# Supplementary material for: PRMT1 is required for the generation of MHC-associated microglia and remyelination in the central nervous system
Source: Life Sci Alliance. 2022 Jun 15;5(10):e202201467. doi: 10.26508/lsa.202201467 (PMC9201232; doi:10.26508/lsa.202201467)
Supplement: Supplementary file 1 [file LSA-2022-01467_TableS1.xlsx]

## Sheet: Sheet 1
p_val	avg_logFC	pct.1	pct.2	p_val_adj	cluster	gene
0	1.71995	0.94	0.218	0	A1	Stmn1
0	1.20137	0.603	0.026	0	A1	Birc5
0	1.34727	0.579	0.04	0	A1	Ube2c
0	1.13211	0.693	0.17	0	A1	Tubb4b
0	1.02175	0.503	0.019	0	A1	Pclaf
0	0.949577	0.489	0.04	0	A1	Pttg1
0	0.871372	0.487	0.061	0	A1	Cdk1
0	0.977337	0.438	0.018	0	A1	Top2a
0	0.76238	0.457	0.047	0	A1	Cks1b
6.25846e-267	0.832358	0.492	0.086	8.63855e-263	A1	H2afx
3.6671e-301	0.889773	0.471	0.068	5.06169e-297	A1	Cenpa
3.8831e-190	1.14331	0.794	0.393	5.35984e-186	A1	Hmgb2
0	0.771334	0.414	0.015	0	A1	Cdca8
1.58872e-243	1.04735	0.909	0.518	2.19292e-239	A1	Tuba1b
1.41833e-158	0.854332	0.711	0.324	1.95772e-154	A1	Ube2s
8.9209e-237	0.739771	0.466	0.086	1.23135e-232	A1	Cks2
0	0.763277	0.386	0.007	0	A1	Pbk
9.37878e-138	0.729454	0.723	0.345	1.29455e-133	A1	Tagln2
1.84665e-147	0.713708	0.612	0.236	2.54893e-143	A1	Hmgn2
0	0.771279	0.397	0.022	0	A1	Ccnb2
0	0.719516	0.387	0.014	0	A1	Cdca3
6.75114e-144	0.731418	0.587	0.219	9.3186e-140	A1	H2afv
6.29786e-226	0.939791	0.904	0.541	8.69293e-222	A1	Ran
0	0.747231	0.364	0.008	0	A1	Nusap1
2.44385e-125	0.701497	0.725	0.378	3.37324e-121	A1	Ranbp1
0	0.646448	0.346	0.005	0	A1	Ccna2
1.00622e-99	0.636376	0.623	0.283	1.38888e-95	A1	Lgals1
2.86588e-103	0.572845	0.676	0.339	3.95577e-99	A1	Psat1
0	0.605988	0.355	0.021	0	A1	Racgap1
0	0.643124	0.345	0.013	0	A1	Lockd
2.4443e-100	0.563404	0.731	0.399	3.37387e-96	A1	Nme1
2.31346e-108	0.58231	0.75	0.419	3.19327e-104	A1	Calm3
0	0.611728	0.351	0.024	0	A1	Cenpw
0	0.825678	0.342	0.016	0	A1	Mki67
2.53503e-87	0.511326	0.723	0.399	3.49911e-83	A1	Phgdh
0	0.688373	0.327	0.007	0	A1	Prc1
5.71569e-125	0.555721	0.462	0.145	7.88937e-121	A1	Selenoh
2.46424e-111	0.619972	0.779	0.463	3.40139e-107	A1	Dbi
3.95194e-91	0.55125	0.678	0.364	5.45486e-87	A1	Txn1
1.35399e-201	0.58345	0.372	0.06	1.86891e-197	A1	Smc2
0	0.810723	0.324	0.014	0	A1	Cenpf
8.76074e-117	0.530495	0.458	0.149	1.20925e-112	A1	Lsm2
4.13926e-88	0.514942	0.711	0.402	5.71342e-84	A1	Cenpx
6.38782e-77	0.507553	0.692	0.385	8.8171e-73	A1	Gm1673
3.62247e-107	0.605409	0.812	0.506	5.0001e-103	A1	Anp32b
2.33252e-91	0.538698	0.563	0.258	3.21958e-87	A1	Banf1
2.70071e-79	0.490028	0.626	0.325	3.72778e-75	A1	Cbx3
3.41918e-83	0.491077	0.571	0.271	4.7195e-79	A1	Rnaseh2c
0	0.605454	0.304	0.006	0	A1	Cdc20
8.1232e-100	0.552565	0.811	0.515	1.12124e-95	A1	Ndufc1
1.63671e-78	0.473575	0.614	0.319	2.25915e-74	A1	Lsm6
1.14228e-85	0.531886	0.824	0.53	1.57668e-81	A1	Fxyd5
2.86159e-64	0.456882	0.792	0.499	3.94986e-60	A1	Fabp5
8.80218e-89	0.541449	0.787	0.495	1.21496e-84	A1	Prelid1
5.19817e-84	0.527464	0.708	0.417	7.17504e-80	A1	Uqcc2
0	0.594787	0.304	0.014	0	A1	Tk1
4.84957e-103	0.564143	0.848	0.558	6.69386e-99	A1	Fkbp2
5.03253e-81	0.53961	0.568	0.282	6.9464e-77	A1	Nucks1
2.43353e-74	0.47803	0.64	0.354	3.359e-70	A1	Lsm4
1.44699e-75	0.494869	0.798	0.513	1.99728e-71	A1	Pgk1
5.12242e-90	0.498073	0.871	0.587	7.07047e-86	A1	Capg
1.42021e-183	0.554615	0.332	0.052	1.96031e-179	A1	Tyms
0	0.526025	0.287	0.007	0	A1	Tpx2
5.73648e-75	0.489845	0.539	0.26	7.91807e-71	A1	Snrpd1
0	0.566189	0.28	0.004	0	A1	Ccnb1
5.71004e-81	0.490328	0.778	0.502	7.88157e-77	A1	Swi5
8.77107e-77	0.496023	0.745	0.469	1.21067e-72	A1	Atp5o
4.3347e-70	0.454252	0.645	0.37	5.98319e-66	A1	Mrpl33
0	0.644521	0.281	0.007	0	A1	Rrm2
1.71511e-95	0.531673	0.954	0.68	2.36737e-91	A1	Cst7
1.99585e-102	0.543077	0.402	0.129	2.75488e-98	A1	Tuba1c
6.01232e-73	0.466282	0.515	0.242	8.2988e-69	A1	Mrpl51
2.55226e-98	0.554036	0.876	0.604	3.52288e-94	A1	Pgam1
3.76487e-67	0.431983	0.754	0.482	5.19664e-63	A1	Ap2s1
4.12496e-81	0.561324	0.474	0.203	5.69368e-77	A1	Pcna
2.92331e-92	0.558826	0.825	0.556	4.03505e-88	A1	Hmgn1
2.98488e-66	0.445619	0.547	0.278	4.12002e-62	A1	Tceal9
3.7953e-106	0.566292	0.871	0.604	5.23866e-102	A1	Ndufa4
6.93218e-76	0.491092	0.485	0.218	9.56849e-72	A1	Dctpp1
1.38077e-62	0.417246	0.594	0.327	1.90587e-58	A1	Mrpl20
3.5516e-89	0.532116	0.826	0.56	4.90228e-85	A1	Cox5a
9.65494e-99	0.526744	0.893	0.627	1.33267e-94	A1	Tpi1
1.61924e-65	0.448729	0.622	0.357	2.23503e-61	A1	Nudc
1.44834e-78	0.472264	0.794	0.53	1.99915e-74	A1	Ndufb7
0	0.474667	0.273	0.011	0	A1	Spc24
2.32743e-263	0.464108	0.284	0.022	3.21255e-259	A1	Tacc3
1.60196e-164	0.748675	0.957	0.696	2.21119e-160	A1	Mif
1.35486e-127	0.586891	0.922	0.661	1.87012e-123	A1	Cox7a2
1.95627e-99	0.525785	0.862	0.602	2.70023e-95	A1	Uqcrb
5.65833e-60	0.411807	0.54	0.28	7.8102e-56	A1	Anxa2
2.93671e-68	0.520439	0.716	0.457	4.05354e-64	A1	Dek
4.9903e-304	0.512622	0.272	0.015	6.88812e-300	A1	Cdkn3
2.46726e-57	0.439964	0.648	0.391	3.40555e-53	A1	Prdx4
1.94882e-60	0.423379	0.695	0.439	2.68996e-56	A1	Timm13
1.52266e-133	0.627881	0.913	0.658	2.10173e-129	A1	Uqcr10
3.89918e-69	0.520704	0.745	0.49	5.38203e-65	A1	Jpt1
1.63018e-66	0.517387	0.452	0.197	2.25013e-62	A1	Ctla2a
1.99734e-74	0.495924	0.798	0.543	2.75693e-70	A1	Smdt1
4.12835e-60	0.443104	0.595	0.34	5.69836e-56	A1	Sf3b5
3.62822e-61	0.423726	0.456	0.202	5.00804e-57	A1	Fn1
4.69797e-83	0.527901	0.817	0.564	6.48461e-79	A1	Atp5g1
9.50899e-97	0.566749	0.838	0.586	1.31253e-92	A1	Rps27l
2.86001e-175	0.464854	0.295	0.043	3.94767e-171	A1	Cdkn2c
2.7701e-65	0.420208	0.838	0.588	3.82357e-61	A1	Sdf2l1
3.11682e-124	0.537567	0.322	0.073	4.30215e-120	A1	Smc4
0	0.460404	0.259	0.01	0	A1	Spc25
1.73357e-71	1.1421	0.452	0.204	2.39285e-67	A1	Hist1h2ap
7.03368e-78	0.437366	0.391	0.143	9.70859e-74	A1	Lsm5
4.99648e-57	0.396868	0.502	0.254	6.89664e-53	A1	Cycs
2.49052e-64	0.452985	0.759	0.512	3.43766e-60	A1	Ndufb11
1.06376e-126	0.589987	0.922	0.676	1.46831e-122	A1	Atp5j
2.838e-82	0.475625	0.851	0.605	3.91729e-78	A1	Nedd8
1.83704e-52	0.400754	0.609	0.363	2.53567e-48	A1	Ndufa5
3.0147e-53	0.390583	0.63	0.384	4.16119e-49	A1	Ndufs6
4.41956e-57	0.443294	0.567	0.322	6.10032e-53	A1	1810037I17Rik
1.20363e-69	0.450534	0.77	0.525	1.66137e-65	A1	Micos10
2.51141e-54	0.380228	0.516	0.271	3.4665e-50	A1	Snrpd3
4.24931e-52	0.381943	0.552	0.308	5.86532e-48	A1	Dynll2
2.01826e-60	0.454225	0.713	0.469	2.7858e-56	A1	Snrpd2
1.07353e-84	0.499338	0.876	0.633	1.4818e-80	A1	Tma7
5.314e-67	0.471955	0.757	0.514	7.33492e-63	A1	Snrpe
1.61397e-54	0.421761	0.635	0.392	2.22776e-50	A1	Atp5g3
1.46984e-43	0.36137	0.648	0.405	2.02881e-39	A1	Ank
5.82912e-107	0.548808	0.918	0.676	8.04593e-103	A1	Cox5b
1.22936e-75	0.478253	0.826	0.585	1.69689e-71	A1	Cox7b
2.47612e-95	0.457684	0.338	0.097	3.41778e-91	A1	Ccdc34
2.26353e-56	0.435314	0.632	0.391	3.12434e-52	A1	Ndufa12
1.01751e-227	0.425298	0.263	0.023	1.40447e-223	A1	Knstrn
1.65704e-57	0.378566	0.45	0.21	2.28721e-53	A1	Alyref
2.11799e-243	1.06322	0.972	0.732	2.92346e-239	A1	Tubb5
2.7765e-67	0.472169	0.806	0.566	3.83241e-63	A1	Krtcap2
2.25091e-50	0.394265	0.605	0.365	3.10694e-46	A1	Emp3
2.80046e-66	0.439432	0.396	0.157	3.86547e-62	A1	Tmpo
2.71687e-76	0.47324	0.86	0.621	3.75009e-72	A1	Sumo2
1.12215e-143	0.642839	0.936	0.698	1.5489e-139	A1	Uqcrq
2.32258e-265	0.461794	0.253	0.016	3.20586e-261	A1	Asf1b
4.98642e-64	0.433617	0.839	0.602	6.88275e-60	A1	Ndufa1
2.69075e-56	0.405854	0.714	0.477	3.71404e-52	A1	Psmb4
5.39496e-56	0.403321	0.476	0.24	7.44666e-52	A1	Nhp2
1.98566e-54	0.397314	0.487	0.251	2.7408e-50	A1	Snrpf
8.56043e-36	0.292215	0.774	0.538	1.1816e-31	A1	Gas6
1.15405e-52	0.411411	0.677	0.442	1.59293e-48	A1	Nop10
4.67758e-61	0.444917	0.725	0.49	6.45647e-57	A1	Ndufs5
1.52896e-48	0.386797	0.614	0.379	2.11042e-44	A1	Ndufb2
7.46368e-149	0.669313	0.931	0.697	1.03021e-144	A1	Hint1
1.74665e-118	0.594697	0.937	0.704	2.41091e-114	A1	Ldha
2.7092e-92	0.515441	0.895	0.662	3.73951e-88	A1	Cox6a1
1.43397e-71	0.484119	0.807	0.574	1.97931e-67	A1	Bag1
3.56293e-157	0.705035	0.273	0.041	4.91791e-153	A1	Hist1h2ae
8.01125e-74	0.439117	0.364	0.132	1.10579e-69	A1	Lmnb1
2.89409e-126	0.602791	0.93	0.699	3.99471e-122	A1	Atp5k
2.06731e-51	0.428544	0.603	0.372	2.85351e-47	A1	Ndufa11
1.03974e-68	0.387918	0.365	0.135	1.43515e-64	A1	Sae1
8.07225e-92	0.527249	0.903	0.674	1.11421e-87	A1	Eno1
9.25287e-77	0.483316	0.845	0.616	1.27717e-72	A1	Tmem256
6.83725e-56	0.372117	0.43	0.201	9.43745e-52	A1	Erh
1.84173e-46	0.353762	0.718	0.49	2.54214e-42	A1	Mdh1
1.95715e-46	0.379013	0.544	0.317	2.70146e-42	A1	Mrpl42
3.45271e-44	0.334205	0.533	0.306	4.76577e-40	A1	Mrps14
9.13122e-87	0.44629	0.319	0.092	1.26038e-82	A1	Incenp
2.01501e-48	0.390802	0.682	0.456	2.78132e-44	A1	Psmb2
1.87384e-45	0.382777	0.561	0.335	2.58646e-41	A1	Rex1bd
1.27263e-148	0.702658	0.969	0.744	1.75661e-144	A1	Tmsb10
3.68668e-91	0.519349	0.888	0.663	5.08873e-87	A1	Tomm6
1.61689e-47	0.370692	0.711	0.488	2.23179e-43	A1	Tmem160
1.05945e-62	0.364031	0.364	0.141	1.46236e-58	A1	Ddx39
7.33564e-46	0.354481	0.754	0.531	1.01254e-41	A1	Hnrnpa1
1.44004e-45	0.388809	0.584	0.363	1.98769e-41	A1	Ndufab1
1.75475e-44	0.362729	0.561	0.341	2.42208e-40	A1	Fundc2
9.92895e-43	0.335309	0.51	0.29	1.37049e-38	A1	Polr2f
1.5767e-88	0.498532	0.902	0.683	2.17632e-84	A1	Cops9
1.3463e-54	0.419779	0.754	0.535	1.8583e-50	A1	Psmb3
1.33601e-42	0.39533	0.607	0.389	1.84409e-38	A1	Nap1l1
1.6257e-46	0.396817	0.625	0.408	2.24396e-42	A1	Eloc
8.66735e-37	0.313618	0.686	0.47	1.19635e-32	A1	Hprt
2.77736e-40	0.321436	0.51	0.296	3.83359e-36	A1	Psmb7
2.04501e-113	0.39436	0.267	0.054	2.82272e-109	A1	Dnajc9
2.39761e-39	0.381982	0.655	0.442	3.30942e-35	A1	Aprt
1.76965e-130	0.392503	0.254	0.042	2.44265e-126	A1	Rrm1
6.55644e-60	0.424698	0.835	0.623	9.04985e-56	A1	Ndufv3
7.36355e-40	0.345067	0.716	0.504	1.01639e-35	A1	Ube2l3
6.90866e-51	0.409119	0.766	0.555	9.53603e-47	A1	Hsbp1
2.96052e-38	0.329727	0.713	0.502	4.08641e-34	A1	Anapc13
1.35696e-50	0.371029	0.787	0.577	1.87301e-46	A1	Tmem14c
1.72028e-99	0.351077	0.272	0.062	2.3745e-95	A1	Pmf1
6.08062e-39	0.305589	0.49	0.28	8.39308e-35	A1	Ciao2a
9.46644e-55	0.412034	0.788	0.579	1.30665e-50	A1	Romo1
4.80571e-36	0.34698	0.603	0.394	6.63332e-32	A1	Hnrnpab
2.93177e-52	0.399465	0.802	0.594	4.04672e-48	A1	Gngt2
1.3819e-40	0.354329	0.64	0.432	1.90744e-36	A1	Akr1b3
2.45891e-51	0.358364	0.367	0.159	3.39404e-47	A1	Rad21
1.88795e-52	0.345529	0.361	0.153	2.60594e-48	A1	Bola3
9.06759e-68	0.416362	0.902	0.694	1.2516e-63	A1	Tspo
4.35437e-64	0.407001	0.825	0.618	6.01034e-60	A1	Tmem258
6.01339e-49	0.341538	0.378	0.172	8.30028e-45	A1	Ubl4a
3.96082e-42	0.334961	0.433	0.227	5.46712e-38	A1	Anp32e
1.23177e-50	0.391663	0.742	0.536	1.70021e-46	A1	Ndufb8
3.74383e-127	0.576285	0.957	0.752	5.16761e-123	A1	Elob
1.27107e-87	0.469143	0.928	0.723	1.75445e-83	A1	Atpif1
3.15128e-35	0.312066	0.498	0.293	4.34971e-31	A1	Cryl1
5.84086e-93	0.513096	0.921	0.717	8.06214e-89	A1	Snrpg
5.19698e-52	0.394272	0.798	0.594	7.17339e-48	A1	Atp5md
1.07899e-39	0.32484	0.432	0.228	1.48933e-35	A1	Mrpl57
2.37447e-48	0.373135	0.764	0.56	3.27748e-44	A1	Snx3
4.17257e-51	0.364519	0.833	0.629	5.7594e-47	A1	Psmb6
4.93531e-71	0.362819	0.294	0.091	6.81221e-67	A1	Rangap1
1.28421e-74	0.45496	0.905	0.702	1.7726e-70	A1	Ndufa3
0	1.28056	0.995	0.793	0	A1	H2afz
5.69903e-93	0.492883	0.917	0.716	7.86637e-89	A1	Uqcr11
5.1332e-33	0.353142	0.553	0.352	7.08536e-29	A1	Cox6a2
1.66584e-35	0.326287	0.49	0.29	2.29936e-31	A1	Cox20
9.49696e-36	0.323376	0.679	0.479	1.31087e-31	A1	Psmb5
1.83333e-32	0.295261	0.531	0.331	2.53054e-28	A1	Scd2
2.49597e-38	0.330597	0.688	0.49	3.44519e-34	A1	Rab5if
1.59291e-31	0.285396	0.564	0.366	2.19869e-27	A1	Trappc2l
1.4433e-34	0.33134	0.651	0.453	1.99219e-30	A1	Psma1
1.41601e-31	0.280664	0.54	0.343	1.95452e-27	A1	Raly
7.06086e-32	0.329301	0.685	0.489	9.74611e-28	A1	Ramp1
5.6604e-36	0.303753	0.441	0.245	7.81305e-32	A1	Ssna1
5.16967e-78	0.449133	0.918	0.723	7.13569e-74	A1	Chchd2
3.01774e-42	0.346413	0.741	0.546	4.16539e-38	A1	Arpp19
1.01786e-151	0.719119	0.944	0.75	1.40495e-147	A1	Hmgb1
1.62171e-37	0.350001	0.656	0.462	2.23845e-33	A1	Mrps21
3.14507e-33	0.315488	0.545	0.351	4.34114e-29	A1	Tmem167
1.81243e-32	0.312809	0.724	0.53	2.5017e-28	A1	Dstn
1.45131e-34	0.329703	0.645	0.452	2.00325e-30	A1	Mydgf
5.61826e-35	0.339256	0.493	0.3	7.75488e-31	A1	Gtf2h5
1.58465e-33	0.330235	0.637	0.445	2.18729e-29	A1	Ssr2
4.48972e-36	0.322571	0.67	0.478	6.19717e-32	A1	Rnf7
4.74418e-65	0.440478	0.866	0.674	6.54839e-61	A1	Bola2
1.93434e-52	0.354825	0.857	0.665	2.66997e-48	A1	Mrfap1
1.27115e-40	0.350272	0.71	0.518	1.75458e-36	A1	Tle5
5.40537e-42	0.339836	0.847	0.655	7.46104e-38	A1	Reep5
4.81351e-47	0.383831	0.779	0.588	6.64409e-43	A1	Ppp1r14b
1.59327e-34	0.317082	0.678	0.487	2.1992e-30	A1	Lamtor2
1.10942e-41	0.355495	0.732	0.541	1.53133e-37	A1	Snrpb
1.94001e-100	0.507716	0.941	0.751	2.6778e-96	A1	Atp5j2
1.52771e-35	0.358472	0.465	0.275	2.1087e-31	A1	Bub3
3.27469e-36	0.327182	0.456	0.266	4.52006e-32	A1	Ndufb6
3.15795e-35	0.316694	0.434	0.244	4.35892e-31	A1	Trappc1
2.50022e-35	0.312947	0.665	0.477	3.45105e-31	A1	Ndufb10
2.89685e-31	0.311168	0.626	0.438	3.99852e-27	A1	Ube2m
1.57602e-28	0.286602	0.636	0.448	2.17539e-24	A1	Psma4
2.1566e-99	0.518501	0.932	0.745	2.97676e-95	A1	Eif5a
3.85443e-33	0.320931	0.479	0.292	5.32027e-29	A1	Rexo2
9.69166e-39	0.314216	0.388	0.201	1.33774e-34	A1	Rbbp7
5.75362e-40	0.334829	0.751	0.564	7.94172e-36	A1	Ndufb9
1.88531e-31	0.325333	0.586	0.399	2.60229e-27	A1	Pdcd5
4.02019e-32	0.324968	0.69	0.504	5.54907e-28	A1	Pet100
1.20157e-88	0.496473	0.92	0.735	1.65853e-84	A1	Mpc1
9.6235e-58	0.418597	0.895	0.71	1.32833e-53	A1	Ifi30
8.06405e-28	0.271939	0.563	0.378	1.11308e-23	A1	Ptges3
7.36256e-32	0.305106	0.648	0.463	1.01625e-27	A1	Wdr83os
5.3011e-29	0.289654	0.609	0.424	7.31711e-25	A1	Dynlrb1
4.87635e-32	0.322789	0.461	0.277	6.73082e-28	A1	Hdgf
3.49047e-65	0.321886	0.264	0.08	4.81789e-61	A1	Usp1
7.2495e-30	0.273766	0.506	0.322	1.00065e-25	A1	Cenpb
2.95037e-36	0.326571	0.728	0.544	4.07239e-32	A1	Park7
3.01184e-30	0.286941	0.484	0.3	4.15724e-26	A1	Hpf1
1.36615e-88	0.481068	0.92	0.737	1.88569e-84	A1	Ubl5
9.75214e-40	0.29061	0.349	0.166	1.34609e-35	A1	Dpy30
2.23603e-33	0.284903	0.433	0.25	3.08639e-29	A1	Commd1
4.70597e-33	0.275481	0.387	0.204	6.49565e-29	A1	Vim
5.47461e-34	0.3214	0.711	0.528	7.55661e-30	A1	Vkorc1
8.40461e-31	0.304441	0.52	0.338	1.16009e-26	A1	Pfdn1
2.88004e-125	0.523035	0.967	0.785	3.97532e-121	A1	Prdx1
1.56091e-29	0.277424	0.474	0.293	2.15453e-25	A1	Ndufv2
4.24992e-31	0.306649	0.493	0.312	5.86616e-27	A1	Cdk4
5.83462e-29	0.290475	0.464	0.283	8.05353e-25	A1	Snrpc
1.723e-31	0.288963	0.427	0.246	2.37826e-27	A1	Npl
3.09455e-40	0.347763	0.756	0.575	4.2714e-36	A1	Dpm3
7.77196e-51	0.397742	0.82	0.64	1.07276e-46	A1	Psma7
3.42901e-42	0.327557	0.798	0.618	4.73306e-38	A1	Sec11c
1.08537e-28	0.278005	0.55	0.37	1.49814e-24	A1	S100a13
1.36729e-155	0.656465	0.981	0.801	1.88727e-151	A1	Pkm
1.11511e-42	0.326069	0.822	0.643	1.53919e-38	A1	Hnrnpa3
1.84819e-32	0.291371	0.757	0.578	2.55106e-28	A1	Fis1
1.30406e-31	0.302532	0.453	0.274	1.8e-27	A1	Dap
3.73566e-30	0.288619	0.419	0.24	5.15633e-26	A1	Fkbp3
1.24226e-45	0.41945	0.848	0.669	1.71469e-41	A1	Ccl6
2.00796e-25	0.293659	0.594	0.415	2.77158e-21	A1	Pdap1
1.11416e-39	0.345006	0.775	0.597	1.53788e-35	A1	Spcs1
6.62042e-34	0.285358	0.377	0.199	9.13816e-30	A1	Fam162a
1.9003e-27	0.27277	0.613	0.435	2.62298e-23	A1	Psma2
2.77657e-33	0.329201	0.659	0.482	3.8325e-29	A1	Ndufb5
2.13493e-31	0.317139	0.594	0.417	2.94685e-27	A1	Gng12
2.71764e-28	0.296933	0.596	0.419	3.75116e-24	A1	Slirp
8.42383e-29	0.290265	0.622	0.445	1.16274e-24	A1	Ndufb4
1.84946e-55	0.402836	0.843	0.666	2.55281e-51	A1	Atp5mpl
1.28611e-38	0.31383	0.833	0.656	1.77522e-34	A1	Tmed3
4.13761e-59	0.563499	0.899	0.723	5.71114e-55	A1	Ifi27l2a
8.40107e-65	0.426842	0.886	0.71	1.1596e-60	A1	Atp5h
2.52672e-29	0.283786	0.659	0.483	3.48763e-25	A1	Cuta
6.63919e-41	0.291339	0.317	0.141	9.16408e-37	A1	Eif1ad
1.43375e-43	0.377729	0.794	0.619	1.97901e-39	A1	Atp5f1
3.39547e-37	0.347044	0.77	0.595	4.68676e-33	A1	Gm10076
2.1356e-32	0.310617	0.754	0.579	2.94776e-28	A1	Rbx1
6.28687e-25	0.251234	0.673	0.498	8.67776e-21	A1	Myl12a
4.5137e-28	0.260016	0.433	0.258	6.23026e-24	A1	Cetn3
2.9852e-60	0.411354	0.845	0.67	4.12047e-56	A1	Sec61b
7.62961e-47	0.362408	0.843	0.668	1.05312e-42	A1	Ost4
1.28654e-40	0.330728	0.842	0.667	1.77581e-36	A1	Rbm3
1.98098e-25	0.256052	0.728	0.553	2.73435e-21	A1	Anxa5
1.12011e-101	0.523964	0.941	0.767	1.54608e-97	A1	Ndufa2
8.46192e-29	0.288703	0.549	0.375	1.168e-24	A1	Ywhaq
7.36465e-27	0.275702	0.545	0.371	1.01654e-22	A1	Abracl
1.64084e-29	0.273162	0.759	0.586	2.26485e-25	A1	Rac2
1.25976e-25	0.273794	0.623	0.45	1.73885e-21	A1	Rab5c
2.71677e-56	0.36804	0.899	0.727	3.74996e-52	A1	Ndufa13
1.54323e-49	0.357718	0.872	0.7	2.13012e-45	A1	Ppp1ca
5.18552e-92	0.482609	0.925	0.754	7.15758e-88	A1	Cox6b1
3.95595e-29	0.257847	0.383	0.212	5.4604e-25	A1	AI506816
1.17736e-42	0.315163	0.295	0.124	1.62512e-38	A1	Dtymk
1.31428e-26	0.269741	0.513	0.342	1.8141e-22	A1	Txnl1
3.87704e-50	0.375634	0.856	0.685	5.35148e-46	A1	Atp5d
4.71379e-31	0.309512	0.396	0.226	6.50644e-27	A1	Mrpl18
3.12694e-40	0.299826	0.299	0.129	4.31612e-36	A1	Serf1
1.7734e-24	0.277304	0.533	0.364	2.44783e-20	A1	Cnih4
1.79806e-26	0.274144	0.604	0.435	2.48187e-22	A1	Psmc3
1.41609e-24	0.257204	0.504	0.335	1.95463e-20	A1	Cmpk1
2.82076e-27	0.285332	0.58	0.411	3.8935e-23	A1	Taf10
3.97958e-27	0.253434	0.411	0.243	5.49302e-23	A1	Pin1
1.95683e-114	0.524619	0.974	0.806	2.70102e-110	A1	Ndufb1-ps
2.24682e-61	0.376574	0.922	0.755	3.10129e-57	A1	Tomm7
2.16165e-25	0.268424	0.545	0.378	2.98373e-21	A1	Cct7
5.95781e-45	0.26363	0.268	0.101	8.22357e-41	A1	Nrm
1.5956e-41	0.361923	0.773	0.607	2.2024e-37	A1	Dynll1
8.73024e-31	0.296086	0.793	0.627	1.20504e-26	A1	Lamtor1
2.65826e-24	0.269989	0.499	0.333	3.6692e-20	A1	Mrps24
6.79873e-42	0.258594	0.278	0.113	9.38428e-38	A1	Pcbd2
3.00193e-29	0.267324	0.359	0.194	4.14356e-25	A1	Pfdn6
6.791e-38	0.341722	0.77	0.606	9.37362e-34	A1	Set
7.50782e-24	0.250831	0.488	0.324	1.0363e-19	A1	Commd4
3.99894e-24	0.259425	0.705	0.541	5.51974e-20	A1	H2afj
1.13143e-22	0.250752	0.499	0.336	1.56171e-18	A1	Vdac3
5.10624e-49	0.342622	0.921	0.759	7.04814e-45	A1	Rpl22l1
1.56415e-27	0.289657	0.741	0.579	2.15899e-23	A1	Psme2
5.85165e-23	0.250833	0.524	0.362	8.07703e-19	A1	Ndufa8
1.9453e-25	0.278503	0.462	0.301	2.6851e-21	A1	Coa3
1.81788e-23	0.265065	0.567	0.407	2.50921e-19	A1	Med28
1.19141e-24	0.270021	0.433	0.273	1.64451e-20	A1	Higd1a
1.29008e-61	0.402684	0.89	0.731	1.7807e-57	A1	Sem1
2.22287e-60	0.37662	0.907	0.748	3.06822e-56	A1	Pomp
2.47149e-33	0.302353	0.775	0.616	3.4114e-29	A1	Psmb1
5.16194e-34	0.318004	0.304	0.145	7.12502e-30	A1	Mcm3
9.70409e-33	0.287242	0.862	0.703	1.33946e-28	A1	Hspe1
2.93637e-32	0.290629	0.789	0.631	4.05307e-28	A1	Psenen
1.90759e-30	0.274656	0.756	0.598	2.63305e-26	A1	Edf1
1.83816e-24	0.257244	0.406	0.248	2.53721e-20	A1	Phf5a
3.19171e-26	0.255779	0.372	0.214	4.40552e-22	A1	Usp50
1.55508e-21	0.250526	0.522	0.365	2.14648e-17	A1	Arpc5l
1.49803e-27	0.342684	0.489	0.333	2.06773e-23	A1	Anapc11
1.52359e-23	0.259018	0.485	0.329	2.10301e-19	A1	Cops6
4.24387e-133	0.553614	0.981	0.825	5.85782e-129	A1	Nme2
3.99815e-96	0.455442	0.974	0.818	5.51865e-92	A1	Calm1
1.81211e-44	0.331505	0.921	0.766	2.50126e-40	A1	Gusb
9.34129e-23	0.251956	0.444	0.289	1.28938e-18	A1	Pa2g4
9.86261e-42	0.306319	0.254	0.099	1.36134e-37	A1	Reep4
4.69193e-72	0.387327	0.968	0.813	6.47627e-68	A1	Cotl1
1.43149e-22	0.255532	0.596	0.442	1.97589e-18	A1	Vdac1
1.13336e-45	0.346213	0.852	0.698	1.56437e-41	A1	Ndufa7
3.11208e-39	0.311225	0.861	0.708	4.29561e-35	A1	Eif2s2
3.34417e-31	0.291004	0.82	0.667	4.61595e-27	A1	Capns1
3.55969e-21	0.266312	0.525	0.372	4.91343e-17	A1	Kdelr2
3.79088e-37	0.265511	0.261	0.108	5.23255e-33	A1	Nxt2
7.25546e-22	0.257638	0.521	0.368	1.00147e-17	A1	Naa38
4.30112e-74	0.430398	0.932	0.78	5.93683e-70	A1	Atp5l
6.48823e-22	0.260359	0.558	0.406	8.9557e-18	A1	Snu13
5.12422e-23	0.272494	0.481	0.329	7.07296e-19	A1	U2af1
1.78625e-25	0.26811	0.346	0.195	2.46556e-21	A1	Cxcl14
9.91276e-80	0.433807	0.949	0.799	1.36826e-75	A1	Gpx4
8.77506e-24	0.264513	0.695	0.545	1.21122e-19	A1	Srp14
6.87771e-45	0.346285	0.837	0.687	9.4933e-41	A1	Pebp1
5.81997e-21	0.261143	0.562	0.413	8.0333e-17	A1	Mrps33
8.39472e-22	0.251221	0.729	0.58	1.15872e-17	A1	Eef1g
1.75955e-99	0.474767	0.955	0.807	2.42871e-95	A1	Cox6c
4.16141e-35	0.309901	0.262	0.115	5.74399e-31	A1	Cdkn2d
4.31648e-35	0.291232	0.842	0.695	5.95804e-31	A1	Dad1
2.57035e-103	0.490451	0.957	0.811	3.54786e-99	A1	Ybx1
1.24951e-25	0.271681	0.724	0.578	1.72469e-21	A1	D8Ertd738e
1.82997e-29	0.268675	0.831	0.685	2.5259e-25	A1	Lamtor4
2.64833e-21	0.255839	0.662	0.516	3.65548e-17	A1	Chmp2a
1.03524e-19	0.251907	0.533	0.388	1.42895e-15	A1	Tcp1
2.94785e-26	0.271593	0.318	0.173	4.06892e-22	A1	Siva1
5.99991e-23	0.279028	0.586	0.441	8.28167e-19	A1	Tomm22
5.10986e-24	0.269026	0.714	0.569	7.05314e-20	A1	Tbca
1.59771e-21	0.256078	0.686	0.542	2.20533e-17	A1	Metap2
1.51662e-29	0.307312	0.77	0.627	2.09339e-25	A1	Cox17
1.40005e-25	0.256399	0.761	0.618	1.93249e-21	A1	Arpc4
6.07536e-27	0.312045	0.685	0.543	8.38582e-23	A1	Ndufc2
4.1199e-31	0.264271	0.262	0.12	5.6867e-27	A1	Hat1
3.88563e-101	0.463682	0.972	0.834	5.36334e-97	A1	Myl6
8.53563e-41	0.32047	0.852	0.714	1.17817e-36	A1	Atp5b
1.05971e-21	0.260206	0.67	0.532	1.46272e-17	A1	Cope
2.55302e-30	0.258218	0.923	0.785	3.52394e-26	A1	Ptms
1.44712e-32	0.295561	0.828	0.692	1.99746e-28	A1	Hnrnpf
6.27973e-33	0.300673	0.84	0.708	8.66791e-29	A1	Selenof
1.55065e-67	0.413651	0.931	0.8	2.14037e-63	A1	Ywhae
1.32539e-20	0.255342	0.713	0.582	1.82944e-16	A1	Ddost
2.0508e-47	0.347559	0.897	0.769	2.83072e-43	A1	Grcc10
2.90186e-131	0.550081	0.985	0.858	4.00544e-127	A1	Atox1
5.4171e-72	0.426752	0.955	0.828	7.47722e-68	A1	Aldoa
1.33772e-82	0.663928	0.912	0.786	1.84645e-78	A1	Arl6ip1
9.98847e-25	0.261672	0.835	0.71	1.37871e-20	A1	Psmb8
4.13555e-31	0.25894	0.92	0.796	5.70829e-27	A1	Pycard
8.07343e-31	0.265456	0.902	0.78	1.11438e-26	A1	Arhgdia
2.91927e-54	0.327664	0.95	0.829	4.02947e-50	A1	Akr1a1
1.7325e-138	0.559496	0.99	0.873	2.39138e-134	A1	Syngr1
1.68566e-76	0.404829	0.949	0.832	2.32672e-72	A1	Arpc3
2.6363e-27	0.27174	0.866	0.751	3.63888e-23	A1	Arhgdib
8.11377e-34	0.262575	0.932	0.819	1.11994e-29	A1	Serpine2
4.66574e-90	0.414675	0.987	0.88	6.44012e-86	A1	Ssr4
1.6145e-70	0.386753	0.96	0.854	2.22849e-66	A1	Sec61g
2.03418e-53	0.306608	0.974	0.87	2.80778e-49	A1	Rpl31
6.56591e-96	0.432144	0.986	0.886	9.06293e-92	A1	Rps17
6.56131e-34	0.264291	0.917	0.822	9.05657e-30	A1	Slc25a5
1.27411e-76	0.381841	0.969	0.875	1.75866e-72	A1	Atp5g2
1.36076e-150	0.543754	0.992	0.899	1.87826e-146	A1	Atp5e
5.36696e-84	0.403782	0.973	0.88	7.40802e-80	A1	Rpl36al
7.58664e-44	0.333824	0.879	0.787	1.04718e-39	A1	Gpx1
2.07318e-65	0.361687	0.957	0.869	2.86161e-61	A1	H3f3a
1.03662e-113	0.450126	0.985	0.898	1.43085e-109	A1	Cox7c
1.35796e-40	0.271875	0.959	0.873	1.87439e-36	A1	Ppib
9.49703e-126	0.5032	0.997	0.914	1.31087e-121	A1	Cd52
1.69286e-105	0.435738	0.986	0.903	2.33665e-101	A1	Cox8a
1.36022e-205	0.659221	0.994	0.913	1.87751e-201	A1	Gng5
1.5906e-46	0.293216	0.974	0.894	2.1955e-42	A1	Aif1
2.13027e-31	0.268355	0.932	0.854	2.94042e-27	A1	Calm2
1.75698e-58	0.332191	0.976	0.899	2.42516e-54	A1	Arpc2
2.43439e-59	0.321533	0.971	0.898	3.36019e-55	A1	Rhoa
4.47967e-95	0.401495	0.99	0.919	6.18329e-91	A1	Cox4i1
4.78475e-125	0.462221	0.997	0.928	6.6044e-121	A1	Sh3bgrl3
9.98263e-105	0.423399	0.989	0.922	1.3779e-100	A1	Oaz1
9.25534e-44	0.252614	0.987	0.923	1.27751e-39	A1	Rps6
1.69738e-48	0.303136	0.968	0.907	2.34289e-44	A1	Clic1
4.44443e-148	0.511725	0.997	0.939	6.13464e-144	A1	Gnas
4.53491e-42	0.254871	0.974	0.916	6.25953e-38	A1	Arpc1b
1.03542e-176	0.567221	0.997	0.941	1.4292e-172	A1	Serf2
2.54764e-148	0.504911	0.997	0.944	3.51651e-144	A1	Pfn1
1.21265e-281	0.858908	1	0.949	1.67382e-277	A1	Gapdh
3.47395e-41	0.25298	0.991	0.942	4.79509e-37	A1	Cd68
1.53722e-144	0.474364	1	0.956	2.12182e-140	A1	Cfl1
3.10438e-62	0.284718	0.997	0.954	4.28497e-58	A1	Rps18
2.77821e-80	0.324659	0.992	0.955	3.83476e-76	A1	Rpl27
4.54016e-208	0.630083	0.999	0.967	6.26679e-204	A1	Ptma
1.93029e-60	0.287432	0.992	0.96	2.66437e-56	A1	Rpl14
4.75114e-88	0.33107	0.999	0.969	6.558e-84	A1	Rps2
1.42589e-84	0.311054	0.999	0.971	1.96815e-80	A1	Rpl29
5.7434e-73	0.29698	0.997	0.969	7.92762e-69	A1	Rpl15
1.46902e-110	0.374508	1	0.973	2.02768e-106	A1	Rpl35
1.07459e-86	0.313342	1	0.974	1.48325e-82	A1	Rps19
5.82258e-66	0.292163	0.997	0.973	8.03691e-62	A1	Rps25
1.00535e-66	0.267995	0.999	0.975	1.38768e-62	A1	Rpl8
2.49188e-126	0.390113	1	0.979	3.43954e-122	A1	Uba52
2.91937e-71	0.28692	0.999	0.979	4.0296e-67	A1	Rpl28
2.49415e-288	0.702759	1	0.981	3.44268e-284	A1	Ppia
1.19188e-73	0.290175	1	0.981	1.64515e-69	A1	Rps20
9.8075e-67	0.265808	1	0.981	1.35373e-62	A1	Rpl11
2.36409e-53	0.255556	0.999	0.98	3.26316e-49	A1	Rps7
1.00222e-78	0.30611	0.999	0.981	1.38337e-74	A1	Rplp0
2.80223e-77	0.282894	1	0.982	3.86792e-73	A1	Rps5
8.43506e-160	0.474778	1	0.984	1.16429e-155	A1	Rps26
7.99914e-89	0.299979	1	0.986	1.10412e-84	A1	Rpl32
2.94387e-68	0.263727	1	0.987	4.06342e-64	A1	Rps15a
8.20654e-106	0.336514	0.999	0.987	1.13275e-101	A1	Rpsa
3.22516e-67	0.25065	1	0.99	4.45169e-63	A1	Rps16
8.41789e-188	0.470345	1	0.991	1.16192e-183	A1	Rpl41
2.80318e-74	0.263862	0.999	0.992	3.86922e-70	A1	Rpl19
3.08357e-70	0.250339	1	0.995	4.25625e-66	A1	Rpl21
1.91822e-144	0.384692	1	0.996	2.64773e-140	A1	Rps8
1.11164e-90	0.280766	1	0.996	1.53439e-86	A1	Rpl13
5.14682e-82	0.270523	1	0.996	7.10416e-78	A1	Rps24
2.0813e-69	0.257646	1	0.996	2.87282e-65	A1	Rps12
7.99601e-148	0.415525	1	0.997	1.10369e-143	A1	Fcer1g
1.64029e-69	0.29088	1	0.998	2.26409e-65	A1	Ctsd
3.66881e-128	0.39433	1	0.999	5.06406e-124	A1	Tyrobp
9.36735e-281	0.657534	1	1	1.29298e-276	A1	Tmsb4x
8.99858e-124	0.358199	1	1	1.24207e-119	A1	Actb
2.26925e-154	0.691851	0.823	0.477	3.13224e-150	A2	Fabp5
2.05562e-130	0.580459	0.69	0.368	2.83737e-126	A2	Gm1673
2.72435e-141	0.838206	0.647	0.326	3.76042e-137	A2	Cox6a2
5.32491e-163	0.583886	0.884	0.568	7.34998e-159	A2	Capg
2.065e-129	0.529833	0.791	0.497	2.85032e-125	A2	Pgk1
9.41726e-115	0.474297	0.76	0.467	1.29986e-110	A2	Tmem160
6.6237e-160	0.556224	0.871	0.583	9.14269e-156	A2	Ndufa1
8.29917e-120	0.515485	0.804	0.516	1.14553e-115	A2	Fxyd5
7.40747e-127	0.510727	0.788	0.501	1.02245e-122	A2	Ndufc1
1.77908e-94	0.434314	0.675	0.388	2.45567e-90	A2	Nme1
1.52302e-94	0.41389	0.684	0.403	2.10222e-90	A2	Uqcc2
6.37633e-102	0.580915	0.554	0.274	8.80124e-98	A2	Lgals1
1.74905e-101	0.46048	0.798	0.521	2.41421e-97	A2	Gas6
2.93825e-136	0.52243	0.844	0.568	4.05567e-132	A2	Cox7b
2.01187e-265	0.952381	0.941	0.666	2.77699e-261	A2	Cst7
1.24449e-147	0.538079	0.877	0.604	1.71777e-143	A2	Ndufv3
7.56867e-116	0.471751	0.833	0.56	1.0447e-111	A2	Romo1
5.81512e-139	0.50508	0.861	0.59	8.02661e-135	A2	Pgam1
6.38487e-99	0.434042	0.759	0.488	8.81303e-95	A2	Swi5
8.48728e-249	0.75407	0.95	0.682	1.1715e-244	A2	Mif
2.09835e-168	0.553466	0.911	0.646	2.89636e-164	A2	Tomm6
4.12991e-81	0.426304	0.655	0.39	5.70052e-77	A2	Ank
2.97546e-83	0.37916	0.595	0.331	4.10702e-79	A2	Psat1
9.29826e-106	0.559991	0.445	0.183	1.28344e-101	A2	Ctla2a
1.67711e-120	0.52462	0.836	0.577	2.31491e-116	A2	Cstb
9.09782e-104	0.457245	0.809	0.55	1.25577e-99	A2	Atp5g1
7.26569e-85	0.440554	0.682	0.425	1.00288e-80	A2	Aprt
2.83252e-191	0.590289	0.941	0.684	3.90972e-187	A2	Uqcrq
1.2177e-103	0.434431	0.813	0.559	1.68079e-99	A2	Bag1
8.14509e-170	0.553883	0.937	0.685	1.12427e-165	A2	Atp5k
3.9849e-77	0.385807	0.616	0.365	5.50035e-73	A2	Ndufb2
5.00319e-82	0.55286	0.78	0.532	6.9059e-78	A2	Spp1
1.20251e-81	0.375784	0.797	0.549	1.65982e-77	A2	Cox5a
6.39423e-99	0.452098	0.863	0.616	8.82596e-95	A2	Tpi1
4.51372e-77	0.408191	0.701	0.456	6.23028e-73	A2	Dbi
2.30691e-90	0.427864	0.448	0.204	3.18423e-86	A2	Fabp3
1.03667e-90	0.408563	0.82	0.577	1.43091e-86	A2	Gm10076
7.59305e-173	0.580006	0.912	0.669	1.04807e-168	A2	Cops9
2.40635e-77	0.381401	0.512	0.269	3.32149e-73	A2	Anxa2
2.14217e-94	0.444643	0.791	0.549	2.95684e-90	A2	Fkbp2
5.57901e-89	0.408237	0.816	0.574	7.70071e-85	A2	Rps27l
1.21176e-67	0.346004	0.685	0.446	1.67259e-63	A2	Mrps21
5.14591e-77	0.388052	0.759	0.52	7.1029e-73	A2	Ndufb7
1.84658e-65	0.35607	0.652	0.414	2.54883e-61	A2	Calm3
9.77197e-122	0.499887	0.84	0.603	1.34883e-117	A2	Tmem256
3.97652e-120	0.481848	0.884	0.647	5.48879e-116	A2	Uqcr10
3.6617e-75	0.383536	0.767	0.533	5.05424e-71	A2	Smdt1
4.87572e-59	0.346429	0.72	0.486	6.72996e-55	A2	Igf1
3.51913e-175	0.544374	0.934	0.702	4.85745e-171	A2	Uqcr11
1.20554e-73	0.379825	0.703	0.472	1.66401e-69	A2	Lamtor2
1.13093e-68	0.353268	0.768	0.537	1.56102e-64	A2	Anxa5
3.29412e-120	0.458183	0.896	0.666	4.54688e-116	A2	Atp5j
6.82596e-119	0.48863	0.879	0.65	9.42188e-115	A2	Cox6a1
1.24133e-109	0.437998	0.879	0.65	1.71341e-105	A2	Atp5mpl
2.78458e-73	0.369243	0.756	0.527	3.84355e-69	A2	Srp14
2.38254e-62	0.34229	0.609	0.38	3.28862e-58	A2	Ndufa12
3.43558e-70	0.360067	0.708	0.479	4.74213e-66	A2	Ndufs5
4.63353e-84	0.412333	0.809	0.581	6.39566e-80	A2	Gngt2
1.17479e-64	0.352383	0.676	0.448	1.62156e-60	A2	Wdr83os
1.25233e-80	0.389598	0.82	0.593	1.72858e-76	A2	Uqcrb
1.22625e-155	0.507124	0.948	0.722	1.6926e-151	A2	Ubl5
3.13257e-128	0.510018	0.88	0.654	4.32388e-124	A2	Sec61b
6.8789e-149	0.515051	0.946	0.721	9.49494e-145	A2	Mpc1
6.66108e-119	0.463798	0.888	0.663	9.19429e-115	A2	Eno1
8.29522e-71	0.364973	0.768	0.543	1.14499e-66	A2	Hsbp1
2.13276e-73	0.390737	0.82	0.596	2.94384e-69	A2	Ndufa4
9.87988e-121	0.46821	0.884	0.66	1.36372e-116	A2	Bola2
5.49713e-78	0.375503	0.798	0.574	7.58769e-74	A2	Ppp1r14b
2.89522e-61	0.321043	0.585	0.361	3.99627e-57	A2	Ndufa11
2.01335e-53	0.390011	0.552	0.33	2.77903e-49	A2	Lgals3
2.89591e-60	0.346738	0.623	0.402	3.99723e-56	A2	Gng12
6.04928e-197	0.714797	0.953	0.733	8.34983e-193	A2	Tmsb10
9.3608e-91	0.386821	0.872	0.653	1.29207e-86	A2	Ost4
2.52871e-59	0.312897	0.709	0.49	3.49038e-55	A2	Prelid1
2.6574e-126	0.509165	0.912	0.694	3.66801e-122	A2	Ldha
1.043e-67	0.359202	0.733	0.517	1.43966e-63	A2	Micos10
8.86946e-54	0.305377	0.678	0.463	1.22425e-49	A2	Atp5o
1.94343e-66	0.348839	0.779	0.564	2.68251e-62	A2	Eef1g
6.96904e-76	0.388307	0.797	0.583	9.61937e-72	A2	Atp5md
4.57869e-58	0.341329	0.647	0.433	6.31996e-54	A2	Nop10
2.40336e-63	0.36154	0.766	0.552	3.31735e-59	A2	Tbca
9.01105e-52	0.3088	0.627	0.413	1.24379e-47	A2	Aldh2
4.24932e-55	0.319793	0.688	0.475	5.86534e-51	A2	Ap2s1
7.40786e-129	0.463346	0.912	0.699	1.02251e-124	A2	Atp6v1f
4.70417e-93	0.396801	0.866	0.654	6.49316e-89	A2	Cox7a2
9.27203e-65	0.338594	0.777	0.565	1.27982e-60	A2	Fis1
1.25059e-53	0.323013	0.611	0.399	1.7262e-49	A2	Cenpx
4.85919e-119	0.452613	0.902	0.691	6.70714e-115	A2	Ndufa3
1.9312e-109	0.431515	0.898	0.688	2.66563e-105	A2	Hspe1
2.43318e-76	0.388645	0.806	0.597	3.35852e-72	A2	Nedd8
5.64399e-69	0.380585	0.767	0.558	7.79039e-65	A2	Krtcap2
3.72752e-70	0.368281	0.778	0.569	5.14509e-66	A2	Pgls
9.65052e-74	0.35099	0.852	0.643	1.33206e-69	A2	Tmed3
2.84827e-54	0.299653	0.791	0.583	3.93147e-50	A2	Edf1
8.14495e-51	0.309808	0.539	0.331	1.12425e-46	A2	Fundc2
1.40567e-54	0.308958	0.507	0.299	1.94024e-50	A2	Timm8b
2.73694e-49	0.285135	0.558	0.35	3.7778e-45	A2	Lsm4
2.43635e-58	0.344917	0.733	0.525	3.36289e-54	A2	Ndufb8
3.82564e-51	0.295347	0.516	0.309	5.28053e-47	A2	Hcfc1r1
4.61377e-55	0.322743	0.712	0.505	6.36839e-51	A2	Ndufb11
9.5183e-53	0.291199	0.756	0.549	1.31381e-48	A2	Snx3
1.1849e-48	0.28883	0.564	0.358	1.63552e-44	A2	S100a13
4.16504e-48	0.285786	0.578	0.372	5.74901e-44	A2	Nenf
6.37766e-75	0.401307	0.812	0.607	8.80309e-71	A2	Tmem258
1.52956e-53	0.320006	0.696	0.492	2.11125e-49	A2	Anapc13
2.04961e-156	0.511076	0.944	0.741	2.82907e-152	A2	Elob
1.57045e-65	0.341425	0.83	0.627	2.16769e-61	A2	Psma7
1.60973e-114	0.451545	0.887	0.684	2.22191e-110	A2	Ndufa7
1.28955e-56	0.321022	0.735	0.532	1.77997e-52	A2	Park7
3.18689e-132	0.450799	0.943	0.742	4.39886e-128	A2	Cox6b1
3.02396e-78	0.375388	0.827	0.626	4.17398e-74	A2	Tma7
1.59567e-49	0.297213	0.67	0.469	2.2025e-45	A2	Ndufb5
8.29717e-47	0.290863	0.634	0.433	1.14526e-42	A2	Timm13
2.13111e-93	0.401631	0.87	0.669	2.94157e-89	A2	Cox5b
9.63191e-47	0.287431	0.527	0.327	1.32949e-42	A2	Rex1bd
1.40548e-152	0.485338	0.952	0.753	1.93999e-148	A2	Grcc10
2.65809e-97	0.409722	0.912	0.713	3.66896e-93	A2	Chchd2
4.92446e-61	0.325891	0.412	0.213	6.79724e-57	A2	Gsto1
1.5919e-50	0.312718	0.665	0.466	2.1973e-46	A2	Ndufb10
8.34078e-47	0.291888	0.638	0.439	1.15128e-42	A2	Txndc17
5.52468e-83	0.367816	0.872	0.673	7.62572e-79	A2	Pebp1
3.9195e-51	0.320271	0.552	0.354	5.41008e-47	A2	Naa38
8.42486e-103	0.707147	0.855	0.657	1.16288e-98	A2	Ccl6
1.75888e-151	0.478346	0.952	0.755	2.42778e-147	A2	Ndufa2
5.02609e-45	0.280417	0.63	0.433	6.93751e-41	A2	Ndufb4
1.09097e-75	0.349754	0.87	0.673	1.50586e-71	A2	Atp5d
2.41126e-65	0.322055	0.874	0.677	3.32826e-61	A2	Eif3k
3.61654e-43	0.278327	0.577	0.38	4.99191e-39	A2	Ranbp1
1.95401e-48	0.292754	0.5	0.304	2.69712e-44	A2	Hcst
2.75911e-46	0.290309	0.658	0.462	3.8084e-42	A2	Snrpd2
1.73145e-39	0.252376	0.657	0.461	2.38991e-35	A2	Hprt
6.93921e-54	0.31674	0.713	0.517	9.57819e-50	A2	Vkorc1
1.04564e-53	0.311747	0.749	0.553	1.44329e-49	A2	Ndufb9
2.8377e-98	0.398857	0.911	0.716	3.91688e-94	A2	Ndufa13
3.02836e-56	0.341241	0.777	0.582	4.18004e-52	A2	Sdf2l1
6.55798e-46	0.270954	0.462	0.267	9.05198e-42	A2	Wfdc17
6.56846e-40	0.274253	0.594	0.399	9.06644e-36	A2	Phgdh
1.42742e-49	0.286801	0.78	0.586	1.97026e-45	A2	Spcs1
7.4507e-52	0.314608	0.457	0.263	1.02842e-47	A2	Dap
9.94414e-92	0.401824	0.893	0.699	1.37259e-87	A2	Atp5h
2.15756e-141	0.476761	0.934	0.741	2.97808e-137	A2	Atp5j2
1.49565e-43	0.278412	0.571	0.378	2.06445e-39	A2	Ndufs6
1.23791e-38	0.270088	0.557	0.364	1.70869e-34	A2	Txn1
5.27645e-58	0.302011	0.375	0.182	7.28309e-54	A2	Cxcl14
2.7638e-52	0.31078	0.757	0.564	3.81487e-48	A2	Dpm3
9.49152e-41	0.257855	0.606	0.413	1.31011e-36	A2	Dynlrb1
1.69509e-58	0.333797	0.805	0.613	2.33973e-54	A2	Cox17
1.74037e-54	0.416126	0.389	0.197	2.40224e-50	A2	Fn1
1.03627e-48	0.312969	0.548	0.357	1.43037e-44	A2	Trappc2l
1.49033e-48	0.302918	0.664	0.473	2.0571e-44	A2	Micos13
1.7896e-50	0.288942	0.81	0.62	2.47018e-46	A2	Psmb6
7.65471e-48	0.267862	0.432	0.243	1.05658e-43	A2	Mtln
3.16206e-231	0.654069	0.979	0.79	4.3646e-227	A2	Pkm
1.29493e-83	0.359918	0.88	0.691	1.78739e-79	A2	Hint1
9.9295e-70	0.335355	0.874	0.686	1.37057e-65	A2	Tspo
2.08904e-119	0.441654	0.931	0.744	2.8835e-115	A2	Tomm7
6.70249e-41	0.25442	0.795	0.609	9.25144e-37	A2	Tpd52
6.74554e-47	0.289891	0.442	0.257	9.31087e-43	A2	Ndufb6
1.58091e-39	0.267822	0.506	0.324	2.18213e-35	A2	Mrpl20
2.07552e-146	0.570221	0.957	0.776	2.86483e-142	A2	Prdx1
2.31383e-80	0.367502	0.896	0.715	3.19378e-76	A2	Atpif1
3.17809e-96	0.41642	0.929	0.749	4.38672e-92	A2	Rpl22l1
2.3304e-41	0.268198	0.756	0.576	3.21665e-37	A2	Rac2
9.3833e-41	0.260146	0.698	0.519	1.29518e-36	A2	Eif3i
1.32876e-38	0.260204	0.629	0.45	1.83409e-34	A2	Psmb2
4.10155e-72	0.348751	0.862	0.683	5.66137e-68	A2	Dad1
8.83549e-51	0.301335	0.835	0.656	1.21956e-46	A2	Capns1
2.72443e-91	0.389841	0.898	0.72	3.76053e-87	A2	Sem1
1.05084e-39	0.268165	0.492	0.314	1.45047e-35	A2	Tmem9b
4.18812e-131	0.44659	0.946	0.769	5.78086e-127	A2	Atp5l
1.01152e-69	0.370921	0.881	0.705	1.3962e-65	A2	Ltc4s
9.30458e-39	0.272915	0.672	0.496	1.28431e-34	A2	Pet100
8.47105e-39	0.264288	0.705	0.529	1.16926e-34	A2	Psmb3
1.88795e-38	0.266665	0.544	0.369	2.60594e-34	A2	Mrpl33
9.76605e-39	0.272421	0.648	0.473	1.34801e-34	A2	Psmb4
7.96609e-37	0.255519	0.534	0.36	1.09956e-32	A2	Ndufa5
8.27902e-51	0.30915	0.822	0.649	1.14275e-46	A2	Lrpap1
6.91541e-182	0.522344	0.969	0.796	9.54535e-178	A2	Cox6c
1.50035e-63	0.346354	0.837	0.664	2.07093e-59	A2	Glmp
8.88251e-91	0.390699	0.909	0.737	1.22605e-86	A2	Eif5a
1.07871e-36	0.262593	0.659	0.487	1.48894e-32	A2	Prdx2
1.09989e-62	0.309335	0.292	0.12	1.51818e-58	A2	Serf1
8.32092e-45	0.262876	0.783	0.612	1.14854e-40	A2	Rtraf
9.06047e-46	0.304575	0.378	0.207	1.25062e-41	A2	S100a1
1.4558e-49	0.282477	0.879	0.709	2.00944e-45	A2	Prdx5
1.95179e-35	0.254651	0.562	0.392	2.69405e-31	A2	Pdcd5
5.51802e-84	0.377022	0.906	0.738	7.61653e-80	A2	Pomp
5.54009e-38	0.268219	0.778	0.61	7.64699e-34	A2	Sec11c
3.08242e-231	0.573942	0.984	0.816	4.25466e-227	A2	Nme2
1.52164e-64	0.340189	0.842	0.674	2.10032e-60	A2	Lamtor4
1.08563e-33	0.264571	0.6	0.433	1.49849e-29	A2	Esd
1.61091e-37	0.273533	0.688	0.521	2.22354e-33	A2	Cope
1.06069e-33	0.250585	0.57	0.403	1.46407e-29	A2	Mrps33
1.21691e-218	0.612021	0.983	0.816	1.67969e-214	A2	Aldoa
2.59788e-39	0.262872	0.773	0.607	3.58586e-35	A2	Psmb1
2.02087e-34	0.257522	0.516	0.35	2.78941e-30	A2	1810058I24Rik
1.40278e-156	0.476382	0.964	0.798	1.93625e-152	A2	Ndufb1-ps
1.21042e-45	0.260444	0.327	0.162	1.67075e-41	A2	Baiap2l2
3.26275e-122	0.427544	0.95	0.79	4.50358e-118	A2	Gpx4
9.73465e-80	0.366299	0.909	0.749	1.34367e-75	A2	Rnasek
2.7536e-33	0.264349	0.632	0.473	3.8008e-29	A2	Rnf7
1.46853e-52	0.278584	0.87	0.713	2.02702e-48	A2	Snrpg
2.75019e-28	0.251177	0.52	0.364	3.79608e-24	A2	Emp3
2.40476e-45	0.281777	0.844	0.688	3.31929e-41	A2	Atp6v0e
1.24487e-49	0.283057	0.848	0.693	1.71829e-45	A2	Eif3h
7.71751e-38	0.25458	0.346	0.193	1.06525e-33	A2	Fam162a
1.58929e-58	0.308197	0.902	0.75	2.1937e-54	A2	Nsa2
1.54172e-28	0.261922	0.637	0.485	2.12803e-24	A2	Ramp1
9.68537e-43	0.288477	0.868	0.717	1.33687e-38	A2	Ifi27l2a
3.91415e-81	0.35424	0.924	0.778	5.4027e-77	A2	Mrpl52
1.76002e-122	0.435104	0.97	0.826	2.42936e-118	A2	Myl6
2.73843e-124	0.433	0.963	0.819	3.77985e-120	A2	Akr1a1
3.46139e-245	0.600042	0.992	0.849	4.77776e-241	A2	Atox1
1.15954e-48	0.263812	0.884	0.741	1.60052e-44	A2	Arhgdib
4.97778e-82	0.371912	0.949	0.807	6.87082e-78	A2	Cotl1
7.94284e-117	0.406203	0.955	0.815	1.09635e-112	A2	Uqcrh
1.54501e-49	0.312198	0.842	0.702	2.13258e-45	A2	Eif2s2
4.8035e-85	0.338911	0.945	0.807	6.63027e-81	A2	Eif3f
3.07383e-52	0.289242	0.912	0.776	4.24281e-48	A2	Atp6v1g1
2.20093e-80	0.330703	0.947	0.812	3.03794e-76	A2	Btf3
1.60825e-156	0.486452	0.979	0.845	2.21987e-152	A2	Sec61g
5.40429e-102	0.368882	0.955	0.824	7.45954e-98	A2	Arpc3
0	0.717722	0.995	0.865	0	A2	Syngr1
3.70888e-68	0.313669	0.947	0.821	5.11936e-64	A2	Slc25a3
4.98695e-53	0.283557	0.915	0.789	6.88348e-49	A2	Pycard
1.83974e-45	0.28306	0.884	0.762	2.53939e-41	A2	Gusb
2.95585e-61	0.282397	0.962	0.841	4.07996e-57	A2	Npm1
2.66053e-50	0.265953	0.916	0.795	3.67234e-46	A2	Ywhae
2.51649e-56	0.295267	0.934	0.815	3.47351e-52	A2	Calm1
2.50561e-129	0.397876	0.981	0.863	3.45849e-125	A2	Rpl31
8.63242e-122	0.377703	0.983	0.867	1.19153e-117	A2	Atp5g2
1.50149e-67	0.295792	0.95	0.835	2.07251e-63	A2	Rpl4
1.18576e-52	0.259793	0.955	0.84	1.63671e-48	A2	Pfdn5
4.68989e-206	0.524711	0.986	0.873	6.47345e-202	A2	Ssr4
3.38248e-185	0.482384	0.984	0.873	4.66884e-181	A2	Rpl36al
1.0099e-47	0.257265	0.923	0.812	1.39397e-43	A2	Ptpn18
1.30776e-46	0.27611	0.92	0.814	1.80511e-42	A2	Serpine2
2.33441e-282	0.591749	0.998	0.893	3.22219e-278	A2	Atp5e
1.03731e-156	0.422089	0.991	0.892	1.43181e-152	A2	Cox7c
1.62735e-120	0.374916	0.979	0.881	2.24624e-116	A2	Rps17
3.96832e-90	0.355036	0.948	0.851	5.47747e-86	A2	Bsg
5.39689e-132	0.384774	0.992	0.895	7.44932e-128	A2	Gabarap
1.40744e-81	0.330558	0.964	0.867	1.94269e-77	A2	Ppib
6.69864e-193	0.464562	0.991	0.897	9.24614e-189	A2	Cox8a
1.23138e-130	0.383877	0.982	0.891	1.69967e-126	A2	Naca
0	0.669354	0.998	0.908	0	A2	Gng5
5.84599e-244	0.621384	0.998	0.909	8.06922e-240	A2	Cd52
4.07283e-125	0.375344	0.991	0.906	5.62173e-121	A2	Eef1b2
3.93137e-124	0.391832	0.997	0.914	5.42647e-120	A2	Cd63
3.63192e-62	0.293814	0.97	0.89	5.01314e-58	A2	Aif1
3.11757e-220	0.478139	0.993	0.914	4.30318e-216	A2	Cox4i1
1.05838e-90	0.320115	0.992	0.917	1.46089e-86	A2	Oaz1
1.34724e-192	0.458756	0.998	0.924	1.8596e-188	A2	Sh3bgrl3
2.59162e-127	0.373343	0.991	0.918	3.57721e-123	A2	Rps6
8.44174e-70	0.261045	0.983	0.912	1.16521e-65	A2	Arpc1b
3.62151e-281	0.596322	0.998	0.935	4.99877e-277	A2	Gnas
4.24866e-305	0.599738	0.999	0.937	5.86442e-301	A2	Serf2
3.98854e-91	0.343851	0.994	0.939	5.50538e-87	A2	Cd68
5.91118e-81	0.29959	0.985	0.93	8.1592e-77	A2	Eef2
0	0.781264	1	0.946	0	A2	Gapdh
7.49099e-94	0.331885	0.994	0.941	1.03398e-89	A2	Pfn1
2.75532e-177	0.41537	0.997	0.948	3.80316e-173	A2	Rpl22
1.83665e-205	0.422028	0.998	0.952	2.53513e-201	A2	Rpl27
2.20575e-84	0.294302	0.991	0.946	3.0446e-80	A2	Clta
1.14748e-70	0.277376	0.981	0.936	1.58386e-66	A2	Rpl23a
7.87333e-183	0.432879	0.998	0.954	1.08676e-178	A2	Rpl36a
1.54922e-134	0.36683	0.998	0.954	2.13839e-130	A2	Cfl1
4.04386e-197	0.42763	0.995	0.952	5.58174e-193	A2	Rps18
5.02225e-161	0.371043	0.999	0.958	6.93221e-157	A2	Rack1
4.37136e-157	0.405395	0.998	0.959	6.03379e-153	A2	Rpl5
6.11699e-183	0.398264	0.997	0.958	8.44328e-179	A2	Rpl14
3.39447e-141	0.333896	0.998	0.964	4.68538e-137	A2	Rpl7
3.5694e-273	0.472509	1	0.967	4.92684e-269	A2	Rps2
1.25114e-149	0.350585	0.999	0.966	1.72695e-145	A2	Rpl7a
2.187e-82	0.271459	0.999	0.967	3.01872e-78	A2	Atp6v0c
9.54327e-255	0.465237	1	0.969	1.31726e-250	A2	Rpl24
1.32382e-142	0.357938	0.995	0.964	1.82726e-138	A2	Rpl12
4.73264e-235	0.444448	0.998	0.968	6.53246e-231	A2	Rpl15
9.63104e-126	0.324543	0.998	0.968	1.32937e-121	A2	Rps15
1.77147e-302	0.532285	1	0.971	2.44516e-298	A2	Rpl35
2.01096e-228	0.430365	0.998	0.969	2.77572e-224	A2	Rpl29
3.71911e-220	0.415401	1	0.972	5.13349e-216	A2	Rps19
1.90795e-76	0.299274	0.998	0.97	2.63355e-72	A2	Fcrls
4.81675e-191	0.408934	0.999	0.972	6.64855e-187	A2	Rps25
1.16196e-202	0.393624	1	0.973	1.60385e-198	A2	Rpl8
2.95966e-137	0.318461	0.998	0.972	4.08522e-133	A2	Rpl3
2.02258e-225	0.414104	1	0.975	2.79176e-221	A2	Rpl26
1.03674e-142	0.327592	0.998	0.973	1.43101e-138	A2	Rpl13a
0	0.538068	1	0.978	0	A2	Uba52
1.09404e-241	0.43195	1	0.978	1.5101e-237	A2	Rpl28
1.20134e-210	0.409263	1	0.978	1.65821e-206	A2	Rps7
9.9739e-213	0.401933	0.999	0.977	1.3767e-208	A2	Rpl10a
1.29597e-67	0.291039	0.996	0.975	1.78883e-63	A2	Ctsl
9.05227e-259	0.454825	1	0.98	1.24948e-254	A2	Rps20
2.31605e-191	0.37368	1	0.98	3.19684e-187	A2	Rps23
4.55073e-123	0.328996	0.997	0.977	6.28137e-119	A2	Npc2
4.67116e-266	0.468388	0.999	0.98	6.4476e-262	A2	Rplp0
2.52737e-266	0.440362	0.999	0.98	3.48853e-262	A2	Rpl11
1.95741e-194	0.380055	1	0.981	2.70182e-190	A2	Rpl9
4.16367e-165	0.35748	1	0.981	5.74712e-161	A2	Rps28
9.90765e-165	0.336468	0.999	0.98	1.36755e-160	A2	Rps3
4.2183e-240	0.420653	0.999	0.981	5.82251e-236	A2	Rps5
4.03478e-208	0.394751	1	0.982	5.56921e-204	A2	Rps13
3.74369e-184	0.382814	0.998	0.98	5.16741e-180	A2	Ppia
1.36659e-164	0.341352	0.999	0.981	1.8863e-160	A2	Rpl17
2.58801e-182	0.355292	1	0.983	3.57223e-178	A2	Rpl18
5.1011e-123	0.294132	1	0.983	7.04105e-119	A2	Rps14
0	0.667959	0.999	0.983	0	A2	Rps26
1.10482e-186	0.390167	0.999	0.983	1.52498e-182	A2	Rpl36
2.05521e-303	0.475564	1	0.985	2.83681e-299	A2	Rpl32
4.69638e-271	0.45471	1	0.986	6.48241e-267	A2	Rpsa
3.27631e-258	0.43777	1	0.986	4.52229e-254	A2	Rps15a
6.22592e-288	0.45265	1	0.988	8.59364e-284	A2	Rps10
5.69667e-223	0.387988	1	0.989	7.86312e-219	A2	Rpl10
2.42258e-221	0.387611	1	0.989	3.34388e-217	A2	Rps16
7.53994e-224	0.406306	1	0.99	1.04074e-219	A2	Rps3a1
0	0.603527	1	0.991	0	A2	Rpl41
3.48839e-307	0.456661	1	0.991	4.81503e-303	A2	Rpl19
5.91844e-198	0.342815	1	0.991	8.16922e-194	A2	Rplp2
9.04453e-298	0.448365	1	0.994	1.24842e-293	A2	Rpl27a
3.88167e-229	0.387938	1	0.994	5.35786e-225	A2	Rps4x
1.7644e-221	0.385719	1	0.994	2.4354e-217	A2	Rpl18a
1.69566e-227	0.383501	1	0.994	2.34052e-223	A2	Rpl34
8.89871e-214	0.369546	1	0.994	1.22829e-209	A2	Rps11
3.12568e-280	0.458842	1	0.995	4.31438e-276	A2	Rpl38
0	0.449237	1	0.995	0	A2	Rps27a
6.96618e-293	0.434104	1	0.995	9.61542e-289	A2	Rps24
1.2735e-267	0.423574	1	0.995	1.75781e-263	A2	Rpl23
9.8745e-183	0.398339	1	0.995	1.36298e-178	A2	Ctsz
1.50034e-219	0.373635	1	0.995	2.07092e-215	A2	Rpl30
0	0.549515	1	0.996	0	A2	Rps8
6.75051e-288	0.45227	1	0.996	9.31773e-284	A2	Rps12
0	0.443105	1	0.996	0	A2	Rpl13
6.54052e-267	0.417712	0.999	0.995	9.02788e-263	A2	Rpl21
4.01008e-224	0.359952	1	0.996	5.53511e-220	A2	Tpt1
3.15079e-183	0.34648	1	0.996	4.34903e-179	A2	Rpl37a
1.53666e-189	0.344637	1	0.996	2.12105e-185	A2	Rpl35a
3.76433e-79	0.283789	1	0.996	5.1959e-75	A2	Ctsb
0	0.559076	1	0.997	0	A2	Fcer1g
0	0.637976	1	0.998	0	A2	Tyrobp
3.45216e-218	0.497121	1	0.998	4.76502e-214	A2	Ctsd
0	0.470625	1	0.998	0	A2	Rpl6
2.49101e-256	0.425024	1	0.998	3.43834e-252	A2	Rpl39
1.19159e-268	0.382631	1	0.998	1.64474e-264	A2	Rplp1
8.72215e-198	0.355084	1	0.998	1.20392e-193	A2	Rps21
1.5028e-292	0.456792	1	0.999	2.07431e-288	A2	Rpl37
9.99842e-292	0.430175	1	0.999	1.38008e-287	A2	Fau
7.26667e-112	0.423481	1	0.999	1.00302e-107	A2	Fth1
0	0.546041	1	1	0	A2	Tmsb4x
2.24696e-154	0.405722	1	1	3.10148e-150	A2	Ftl1
1.92346e-247	0.391739	1	1	2.65496e-243	A2	Eef1a1
2.26466e-275	0.381878	1	1	3.12591e-271	A2	Rps29
0	2.02643	0.873	0.085	0	B1	Ms4a7
7.5912e-213	1.08339	0.783	0.211	1.04781e-208	B1	Cybb
5.33499e-211	1.46927	0.82	0.265	7.36389e-207	B1	Wfdc17
0	1.06944	0.559	0.02	0	B1	Clec12a
2.24875e-192	1.16386	0.854	0.332	3.10395e-188	B1	Ms4a6c
8.5379e-160	0.979997	0.877	0.383	1.17849e-155	B1	Apobec1
1.95404e-111	0.778916	0.626	0.214	2.69716e-107	B1	Ms4a6b
6.0928e-106	0.732218	0.595	0.203	8.40989e-102	B1	Dab2
2.066e-125	0.731191	0.499	0.126	2.85169e-121	B1	Sash1
5.97709e-94	0.844004	0.839	0.478	8.25018e-90	B1	Gpr65
1.85442e-104	0.681595	0.493	0.141	2.55966e-100	B1	Iqgap1
2.66608e-101	0.679834	0.48	0.134	3.67999e-97	B1	Pf4
3.2117e-79	1.02716	0.812	0.47	4.4331e-75	B1	Rgs1
7.67266e-109	1.48113	0.873	0.549	1.05906e-104	B1	Spp1
0	0.89762	0.326	0.005	0	B1	Cd38
5.4223e-61	0.562986	0.534	0.233	7.4844e-57	B1	Apoc2
1.81932e-59	0.607489	0.8	0.502	2.51121e-55	B1	Igf1
3.2487e-70	0.508531	0.443	0.146	4.48419e-66	B1	Tgfbi
3.49593e-61	0.529688	0.507	0.211	4.82543e-57	B1	Mpp1
1.56582e-72	0.565283	0.422	0.134	2.1613e-68	B1	Wwp1
1.30586e-45	0.593272	0.658	0.384	1.80248e-41	B1	Stab1
1.01127e-95	0.516661	0.355	0.081	1.39586e-91	B1	Mdfic
2.19366e-40	0.492201	0.572	0.305	3.02791e-36	B1	Gcnt2
7.94002e-46	0.562879	0.649	0.384	1.09596e-41	B1	Rap2a
9.29779e-271	0.574072	0.271	0.012	1.28337e-266	B1	Mndal
3.36684e-34	0.423128	0.551	0.298	4.64725e-30	B1	Lgals1
7.23051e-36	0.421064	0.522	0.277	9.98027e-32	B1	Pkib
9.28025e-40	0.422057	0.441	0.201	1.28095e-35	B1	Myo5a
4.80386e-47	0.711729	0.405	0.166	6.63077e-43	B1	Apoc4
2.95664e-58	1.42112	0.361	0.122	4.08105e-54	B1	Gpnmb
3.11561e-71	0.37874	0.309	0.073	4.30048e-67	B1	Mtss1
2.22793e-32	0.367942	0.484	0.249	3.07522e-28	B1	Tpp2
1.83956e-82	0.56705	0.294	0.062	2.53915e-78	B1	Adam33
5.68858e-35	0.4589	0.643	0.414	7.85195e-31	B1	Sptssa
2.74518e-135	0.472547	0.255	0.029	3.78917e-131	B1	Arhgap15
3.05404e-41	0.454676	0.384	0.16	4.21549e-37	B1	Ifi207
1.22312e-46	0.348169	0.324	0.108	1.68827e-42	B1	Esyt1
1.57931e-32	0.462693	0.457	0.242	2.17992e-28	B1	Gyg
6.06261e-78	0.401615	0.263	0.052	8.36822e-74	B1	Fzd7
1.43795e-34	0.443282	0.808	0.598	1.9848e-30	B1	Abca1
5.67488e-70	0.37431	0.261	0.057	7.83303e-66	B1	Msr1
1.98682e-149	1.26475	0.954	0.751	2.74241e-145	B1	Bst2
9.51547e-36	0.390808	0.351	0.148	1.31342e-31	B1	Galc
1.84185e-32	0.405066	0.384	0.181	2.5423e-28	B1	Msrb1
1.83741e-27	0.378515	0.608	0.405	2.53618e-23	B1	Tnfaip8
2.48648e-21	0.324893	0.574	0.372	3.43209e-17	B1	Ms4a6d
7.71437e-27	0.410967	0.741	0.543	1.06481e-22	B1	Nrp1
2.3324e-21	0.368743	0.587	0.39	3.21941e-17	B1	Tmcc3
3.32105e-27	0.394471	0.447	0.251	4.58404e-23	B1	Mvb12a
4.48738e-22	0.325321	0.537	0.342	6.19393e-18	B1	Smim14
1.07655e-33	0.355692	0.332	0.14	1.48596e-29	B1	Cyp4f18
2.41965e-63	0.63747	0.902	0.713	3.33985e-59	B1	Tmem176a
1.7669e-23	0.401824	0.643	0.457	2.43885e-19	B1	Plin2
1.59613e-19	0.309567	0.628	0.443	2.20314e-15	B1	Ang
3.61948e-21	0.325706	0.468	0.284	4.99597e-17	B1	Hacd4
3.04012e-19	0.319603	0.428	0.246	4.19627e-15	B1	Pid1
2.93258e-15	0.280859	0.645	0.472	4.04784e-11	B1	P2rx4
9.18481e-49	0.452339	0.971	0.798	1.26778e-44	B1	Fyb
5.93656e-19	0.318603	0.451	0.281	8.19423e-15	B1	Eid1
3.97299e-22	0.311255	0.355	0.185	5.48392e-18	B1	Rftn1
8.10297e-24	0.329244	0.322	0.155	1.11845e-19	B1	Luzp1
2.78985e-31	0.435234	0.812	0.646	3.85082e-27	B1	Tmem86a
2.29598e-18	0.291488	0.407	0.242	3.16915e-14	B1	Vps13c
1.1176e-24	0.253334	0.292	0.127	1.54262e-20	B1	St8sia4
1.82367e-143	0.924716	0.981	0.816	2.51721e-139	B1	Pmepa1
1.76548e-17	0.311004	0.428	0.264	2.43689e-13	B1	Il4ra
4.27579e-17	0.334343	0.47	0.307	5.90187e-13	B1	Camk2d
1.51018e-16	0.256394	0.777	0.615	2.0845e-12	B1	Maf
7.93303e-16	0.267712	0.599	0.438	1.095e-11	B1	Itga6
1.548e-16	0.262869	0.39	0.23	2.1367e-12	B1	Ifnar1
6.47771e-25	0.415606	0.86	0.701	8.94119e-21	B1	Zfp36l1
8.51041e-20	0.25588	0.324	0.166	1.17469e-15	B1	2610507B11Rik
1.41807e-18	0.279136	0.749	0.592	1.95736e-14	B1	Rtcb
1.18991e-15	0.260267	0.835	0.678	1.64243e-11	B1	Rsrp1
2.07891e-28	0.309099	0.255	0.1	2.86952e-24	B1	Serpinb6a
1.13423e-19	0.276491	0.324	0.169	1.56558e-15	B1	Smagp
1.3512e-14	0.275886	0.432	0.278	1.86506e-10	B1	Ifi204
1.56093e-19	0.326785	0.699	0.547	2.15455e-15	B1	H2afj
1.70942e-26	0.317793	0.253	0.101	2.35951e-22	B1	Slc38a6
8.19339e-20	0.353908	0.633	0.484	1.13093e-15	B1	Adgre1
2.60833e-16	0.272959	0.355	0.206	3.60028e-12	B1	Pxdc1
9.38837e-21	0.296949	0.278	0.132	1.29588e-16	B1	Lrp6
1.19684e-12	0.268634	0.447	0.303	1.652e-08	B1	Ankrd12
7.74381e-19	0.263752	0.278	0.134	1.06888e-14	B1	Ptger4
3.02062e-18	0.319044	0.676	0.533	4.16936e-14	B1	Ntpcr
5.18938e-18	0.32977	0.309	0.166	7.1629e-14	B1	2810013P06Rik
8.53411e-18	0.296755	0.299	0.156	1.17796e-13	B1	Prkacb
8.2642e-16	0.285436	0.303	0.161	1.14071e-11	B1	Sesn1
1.71542e-14	0.251789	0.724	0.583	2.3678e-10	B1	Atp2b1
1.44329e-13	0.262159	0.39	0.254	1.99217e-09	B1	Rap2b
6.59364e-13	0.308458	0.347	0.212	9.1012e-09	B1	Lpar6
6.62164e-12	0.371701	0.324	0.198	9.13985e-08	B1	Gadd45g
2.87295e-12	0.256529	0.317	0.191	3.96553e-08	B1	Stk17b
1.84651e-20	0.29336	0.835	0.71	2.54873e-16	B1	Sdcbp
4.61619e-11	0.267892	0.349	0.226	6.37172e-07	B1	R3hdm1
2.56173e-13	0.272375	0.282	0.162	3.53595e-09	B1	AW112010
5.60527e-63	0.586521	0.948	0.839	7.73695e-59	B1	Tmem176b
4.35813e-203	1.78228	0.996	0.921	6.01553e-199	B1	Lyz2
2.37036e-28	0.39992	0.965	0.901	3.27181e-24	B1	Timp2
4.26192e-09	0.362978	0.772	0.714	5.88273e-05	B1	Cd14
2.64132e-35	0.35126	0.973	0.931	3.64582e-31	B1	Selenop
6.1125e-157	0.875984	1	0.985	8.43708e-153	B1	Apoe
1.56968e-213	0.695199	0.531	0.189	2.16663e-209	B2	Ch25h
5.27938e-199	0.514272	0.494	0.163	7.28713e-195	B2	Cacna1a
1.49976e-159	0.634608	0.679	0.368	2.07012e-155	B2	Ank
1.35533e-178	0.484198	0.954	0.646	1.87076e-174	B2	Cst7
3.0363e-129	0.447417	0.697	0.389	4.191e-125	B2	Arsb
4.67765e-143	0.487239	0.569	0.262	6.45656e-139	B2	Gcnt2
5.79686e-143	0.41574	0.502	0.206	8.0014e-139	B2	Myo1e
1.79738e-178	0.493644	0.419	0.131	2.48092e-174	B2	Baiap2l2
4.42414e-103	0.350302	0.601	0.314	6.10664e-99	B2	Psat1
4.44748e-106	0.402979	0.74	0.454	6.13886e-102	B2	Cd180
4.72939e-119	0.401906	0.546	0.264	6.52797e-115	B2	Chst1
5.3441e-113	0.418156	0.776	0.502	7.37647e-109	B2	Hif1a
2.70494e-171	0.554241	0.396	0.123	3.73364e-167	B2	Hcar2
9.27361e-198	0.672263	0.925	0.653	1.28004e-193	B2	Lpl
1.24241e-89	0.376448	0.613	0.345	1.7149e-85	B2	Csf1
1.45371e-73	0.28604	0.62	0.366	2.00656e-69	B2	Prdx4
2.4792e-71	0.312514	0.675	0.427	3.42205e-67	B2	Asap1
1.15425e-81	0.314627	0.521	0.274	1.59321e-77	B2	Apbb2
1.10442e-86	0.371365	0.74	0.494	1.52443e-82	B2	Tbxas1
1.60427e-79	0.29729	0.492	0.248	2.21438e-75	B2	Ints6l
4.57317e-92	0.414418	0.755	0.513	6.31235e-88	B2	Gas6
6.44404e-56	0.259227	0.702	0.462	8.89471e-52	B2	Nktr
7.72981e-79	0.29491	0.502	0.264	1.06695e-74	B2	Cpd
2.02985e-58	0.266848	0.674	0.444	2.8018e-54	B2	Rasgrp3
2.02371e-102	0.602786	0.409	0.181	2.79333e-98	B2	Fn1
7.28414e-49	0.280903	0.707	0.482	1.00543e-44	B2	Fabp5
1.08853e-55	0.283994	0.693	0.471	1.5025e-51	B2	Tent5c
2.00165e-70	0.367813	0.541	0.321	2.76288e-66	B2	Lilrb4a
1.28866e-138	0.405717	0.294	0.081	1.77873e-134	B2	Cspg4
1.11945e-69	0.294727	0.423	0.212	1.54518e-65	B2	Vps13c
3.4703e-66	0.287237	0.814	0.604	4.79006e-62	B2	Lrp1
1.59339e-52	0.251778	0.796	0.587	2.19936e-48	B2	Csf2ra
3.59308e-111	0.345236	0.315	0.108	4.95952e-107	B2	Flt1
2.11929e-79	0.355205	0.372	0.167	2.92526e-75	B2	Gm26917
1.15421e-91	0.325997	0.34	0.136	1.59315e-87	B2	Pdcd1
4.65009e-89	0.440044	0.858	0.659	6.41852e-85	B2	Sgk1
3.08443e-52	0.250424	0.477	0.279	4.25744e-48	B2	Slc16a3
1.61453e-63	0.295078	0.831	0.637	2.22854e-59	B2	Lrpap1
“Spp1	0.279979	0.33	0.138	5.57572e-77	B2	Slc2a6
6.94333e-44	0.454893	0.721	0.531	9.58388e-40	B2	Spp1
3.62406e-65	0.301716	0.361	0.173	5.00228e-61	B2	Kcnq1ot1
7.23171e-61	0.263057	0.876	0.688	9.98193e-57	B2	Ldha
2.35618e-121	0.298679	0.255	0.068	3.25223e-117	B2	Etl4
9.05051e-46	0.268174	0.745	0.558	1.24924e-41	B2	Cd34
5.30905e-133	0.422148	0.928	0.745	7.32808e-129	B2	Gusb
3.71824e-40	0.252429	0.493	0.318	5.13229e-36	B2	Cd72
1.52508e-47	0.268975	0.383	0.209	2.10506e-43	B2	Adamts1
1.01675e-50	0.29602	0.383	0.212	1.40342e-46	B2	Fam20c
5.53978e-187	0.496603	0.967	0.797	7.64656e-183	B2	Serpine2
9.60937e-55	0.351232	0.807	0.644	1.32638e-50	B2	Ccl3
1.10263e-72	0.283806	0.936	0.778	1.52197e-68	B2	Apbb1ip
1.66356e-55	0.290489	0.877	0.745	2.29621e-51	B2	Itgam
3.58814e-78	0.278008	0.943	0.818	4.9527e-74	B2	Plxdc2
9.19334e-25	0.272148	0.775	0.65	1.26896e-20	B2	Ccl4
1.53198e-133	0.362438	0.984	0.86	2.11459e-129	B2	Syngr1
1.60478e-20	0.316785	0.585	0.465	2.21507e-16	B2	Rgs1
1.09903e-20	0.353145	0.452	0.337	1.51698e-16	B2	Socs3
4.28747e-33	0.315894	0.776	0.663	5.91799e-29	B2	Ccl6
4.17094e-60	0.275792	0.958	0.865	5.75715e-56	B2	Calr
1.2303e-61	0.251465	0.971	0.881	1.69819e-57	B2	Anxa3
6.17836e-160	0.357111	0.999	0.931	8.52798e-156	B2	Gnas
3.50098e-51	0.25185	0.966	0.903	4.8324e-47	B2	Hsp90b1
2.24154e-69	0.306265	0.98	0.943	3.09399e-65	B2	Olfml3
2.40977e-74	0.251215	0.998	0.965	3.32621e-70	B2	Cd9
7.20073e-96	0.264528	0.998	0.969	9.93917e-92	B2	Fcrls
5.24563e-115	0.404832	0.995	0.974	7.24054e-111	B2	Ctsl
4.43975e-173	0.485307	0.999	0.989	6.12818e-169	B2	Ly86
1.4893e-126	0.259145	1	0.994	2.05568e-122	B2	Ctsz
2.35903e-213	0.392505	1	0.996	3.25617e-209	B2	Ctsb
3.71455e-185	0.354275	1	0.998	5.1272e-181	B2	Ctsd
3.91098e-271	0.72023	0.822	0.431	5.39833e-267	C1	Lag3
1.71709e-213	0.859311	0.645	0.283	2.37009e-209	C1	Cd74
1.34517e-123	0.580022	0.491	0.236	1.85674e-119	C1	Ifi204
7.03689e-115	0.420786	0.777	0.526	9.71301e-111	C1	Axl
1.12569e-91	0.350072	0.591	0.341	1.55379e-87	C1	Rassf4
3.26061e-115	0.506485	0.436	0.192	4.50062e-111	C1	Itgax
1.3239e-98	0.385764	0.404	0.186	1.82738e-94	C1	Chst2
4.80087e-73	0.275518	0.9	0.682	6.62664e-69	C1	Btg2
5.86852e-61	0.298162	0.543	0.334	8.10032e-57	C1	9930111J21Rik2
1.82156e-204	0.613335	0.923	0.721	2.5143e-200	C1	Lgals3bp
5.42533e-69	0.324896	0.644	0.442	7.48859e-65	C1	P2rx4
1.58944e-66	0.444191	0.673	0.473	2.1939e-62	C1	Ifitm3
1.90535e-79	0.295427	0.359	0.159	2.62996e-75	C1	Tns1
3.82158e-68	0.706258	0.48	0.28	5.27493e-64	C1	Apoc1
6.27689e-66	0.298681	0.412	0.219	8.66399e-62	C1	H2-Q4
3.72974e-50	0.278655	0.567	0.381	5.14816e-46	C1	Apobec3
2.20128e-77	0.434168	0.339	0.158	3.03843e-73	C1	Slfn5
4.53927e-62	0.391725	0.434	0.254	6.26556e-58	C1	Stat1
2.88865e-47	0.265023	0.568	0.392	3.98721e-43	C1	Zfas1
3.36484e-47	0.319152	0.523	0.352	4.64449e-43	C1	Trim30a
2.74268e-86	0.399666	0.803	0.634	3.78572e-82	C1	2410006H16Rik
3.22166e-52	0.326244	0.418	0.249	4.44686e-48	C1	Tor3a
1.5869e-47	0.278769	0.443	0.274	2.1904e-43	C1	Zup1
4.74444e-51	0.263022	0.844	0.677	6.54875e-47	C1	Rgs2
1.33047e-54	0.372469	0.366	0.201	1.83644e-50	C1	Parp14
1.67096e-89	0.353364	0.916	0.753	2.30643e-85	C1	Btg1
1.45798e-38	0.2537	0.539	0.376	2.01245e-34	C1	Apobec1
1.42125e-64	0.429432	0.307	0.146	1.96175e-60	C1	Irf7
6.74015e-71	0.352053	0.272	0.116	9.30343e-67	C1	Oasl2
1.64959e-62	0.252675	0.272	0.121	2.27693e-58	C1	Cd22
2.0805e-44	0.263063	0.35	0.201	2.87171e-40	C1	Sp100
2.21855e-73	0.284816	0.922	0.779	3.06227e-69	C1	Fyb
2.29284e-39	0.403991	0.404	0.262	3.16481e-35	C1	Hist1h1c
3.47254e-43	0.269093	0.851	0.71	4.79315e-39	C1	Ifi27l2a
3.36176e-40	0.253097	0.721	0.585	4.64024e-36	C1	Gm2a
6.01263e-40	0.28114	0.307	0.176	8.29923e-36	C1	Rtp4
2.00513e-38	0.358638	0.332	0.204	2.76768e-34	C1	H2-Ab1
3.44298e-37	0.25589	0.3	0.173	4.75234e-33	C1	Eif2ak2
3.39833e-38	0.250874	0.275	0.149	4.69072e-34	C1	Slfn8
2.701e-132	0.391969	0.98	0.897	3.7282e-128	C1	H2-K1
8.62566e-75	0.294266	0.937	0.861	1.1906e-70	C1	Man2b1
3.17804e-103	0.362398	0.956	0.882	4.38665e-99	C1	Trf
1.53942e-283	0.567559	0.991	0.949	2.12486e-279	C1	H2-D1
3.20867e-102	0.301472	0.982	0.94	4.42892e-98	C1	Ctsh
1.28546e-265	0.69364	0.997	0.983	1.77432e-261	C1	Apoe
6.34178e-140	0.301673	0.998	0.988	8.75357e-136	C1	B2m
3.28612e-112	0.262877	0.999	0.994	4.53584e-108	C1	Rps27
2.62691e-193	0.378786	0.998	0.996	3.62592e-189	C1	Psap
4.23143e-254	0.33538	1	0.999	5.84065e-250	C1	Ctss
6.04757e-175	0.292051	1	0.999	8.34747e-171	C1	Itm2b
0	1.45383	0.816	0.203	0	C2	Gadd45b
0	1.24692	0.886	0.341	0	C2	Nfkbiz
2.77892e-298	1.21266	0.861	0.333	3.83575e-294	C2	Egr1
3.17238e-269	0.922499	0.793	0.274	4.37883e-265	C2	Tnfaip3
0	1.98208	0.703	0.196	0	C2	Il1b
1.35694e-239	1.1659	0.851	0.368	1.87298e-235	C2	Ccrl2
6.22134e-260	0.990408	0.685	0.219	8.58731e-256	C2	Bcl2a1d
6.64232e-260	1.10163	0.619	0.161	9.16839e-256	C2	Nr4a1
3.14011e-224	1.10695	0.66	0.204	4.3343e-220	C2	Tnf
2.95425e-258	1.1701	0.91	0.455	4.07775e-254	C2	Ier2
5.48667e-184	0.664219	0.75	0.305	7.57325e-180	C2	Tgif1
1.38914e-234	1.01025	0.669	0.226	1.91742e-230	C2	Bcl2a1a
4.9619e-188	0.767624	0.753	0.31	6.84891e-184	C2	Cd74
0	1.60439	0.501	0.063	0	C2	Dusp2
6.82272e-216	1.24273	0.701	0.264	9.41741e-212	C2	Il1a
1.02745e-174	0.744409	0.893	0.46	1.41819e-170	C2	Ier3
6.10465e-152	0.69279	0.822	0.406	8.42625e-148	C2	Ppp1r15a
2.66132e-197	1.04089	0.596	0.199	3.67343e-193	C2	Arl5c
1.42912e-180	0.737667	0.567	0.171	1.97261e-176	C2	Gem
2.87152e-192	0.691345	0.55	0.155	3.96357e-188	C2	Csrnp1
1.70955e-111	0.503563	0.886	0.495	2.3597e-107	C2	Dusp1
5.84557e-163	0.711548	0.605	0.219	8.06865e-159	C2	Ifrd1
4.73886e-163	0.726619	0.586	0.201	6.54105e-159	C2	Itgax
1.25611e-225	1.10581	0.503	0.12	1.7338e-221	C2	Sdc4
2.40304e-161	0.735802	0.947	0.566	3.31691e-157	C2	Fos
9.50332e-178	0.673293	0.532	0.155	1.31174e-173	C2	Rasgef1b
2.14765e-172	0.594826	0.513	0.144	2.9644e-168	C2	Kdm6b
1.29418e-297	1.29472	0.967	0.605	1.78636e-293	C2	Nfkbia
1.31294e-209	1.06236	0.947	0.593	1.81225e-205	C2	Atf3
2.62985e-112	0.567231	0.695	0.341	3.62998e-108	C2	Sowahc
9.0188e-149	1.02879	0.712	0.36	1.24486e-144	C2	Csf1
0	1.29762	0.99	0.642	0	C2	Cd83
2.07011e-165	0.682478	0.484	0.136	2.85737e-161	C2	Nfkbid
5.53564e-117	0.552679	0.601	0.253	7.64085e-113	C2	Rel
4.88615e-131	0.662136	0.578	0.233	6.74435e-127	C2	Plaur
3.47505e-125	0.690043	0.535	0.195	4.79662e-121	C2	Osm
7.66757e-133	0.679429	0.816	0.479	1.05835e-128	C2	Tlr2
1.39708e-118	0.809736	0.747	0.413	1.92839e-114	C2	Icam1
9.8486e-141	0.512542	0.485	0.152	1.3594e-136	C2	Plekho2
4.47191e-83	0.437454	0.805	0.475	6.17258e-79	C2	Lag3
3.7131e-110	0.737779	0.628	0.3	5.1252e-106	C2	Cdkn1a
9.83458e-106	0.734076	0.729	0.406	1.35747e-101	C2	Id2
2.27519e-119	0.503354	0.484	0.17	3.14045e-115	C2	Rab20
1.24221e-100	0.574676	0.756	0.452	1.71462e-96	C2	Cxcl16
3.24414e-70	0.400708	0.613	0.311	4.47788e-66	C2	Neurl3
8.76417e-86	0.411391	0.521	0.222	1.20972e-81	C2	Gm43305
4.57732e-180	0.703994	0.993	0.695	6.31807e-176	C2	Btg2
4.25935e-175	0.787048	0.955	0.662	5.87918e-171	C2	Cebpb
6.59558e-81	0.583935	0.635	0.346	9.10388e-77	C2	Pdgfb
2.91462e-61	0.372063	0.78	0.494	4.02304e-57	C2	Ccnl1
2.51634e-99	0.527026	0.452	0.167	3.4733e-95	C2	Irf1
8.41688e-71	0.424546	0.81	0.528	1.16178e-66	C2	Skil
6.10096e-231	1.03163	0.969	0.689	8.42115e-227	C2	Cd14
2.97065e-85	0.503992	0.786	0.507	4.10039e-81	C2	Chd4
5.77856e-59	0.349402	0.61	0.331	7.97614e-55	C2	Socs3
7.79076e-68	0.461068	0.669	0.394	1.07536e-63	C2	Herpud1
2.35728e-89	0.373597	0.441	0.167	3.25375e-85	C2	Fgr
2.67333e-59	0.373628	0.732	0.459	3.69e-55	C2	Dennd4a
3.80802e-183	0.708246	0.993	0.726	5.2562e-179	C2	Zfp36
3.08008e-79	0.334046	0.949	0.683	4.25143e-75	C2	Ier5
1.61904e-150	1.12959	0.912	0.647	2.23476e-146	C2	Ccl4
1.16989e-73	0.463757	0.764	0.5	1.6148e-69	C2	Slc15a3
2.71388e-104	0.404153	0.383	0.119	3.74597e-100	C2	Zc3h12a
3.98386e-116	0.393659	0.345	0.09	5.49892e-112	C2	Pde4b
1.39164e-58	0.3841	0.639	0.385	1.92088e-54	C2	Gna13
2.18005e-43	0.322844	0.724	0.47	3.00913e-39	C2	Smad7
2.22402e-162	0.673712	0.965	0.716	3.06982e-158	C2	Mcl1
3.06018e-62	0.345509	0.482	0.233	4.22397e-58	C2	Smim3
1.68178e-52	0.379154	0.714	0.466	2.32137e-48	C2	Sqstm1
1.76833e-43	0.253832	0.811	0.564	2.44083e-39	C2	Irf2bp2
2.27503e-106	0.431274	0.344	0.098	3.14022e-102	C2	Pmaip1
1.10833e-97	0.430441	0.346	0.106	1.52983e-93	C2	Pim3
1.83266e-120	1.05113	0.889	0.65	2.52961e-116	C2	Ccl3
1.0925e-54	0.334129	0.794	0.559	1.50798e-50	C2	Pnrc1
1.20226e-43	0.318602	0.784	0.552	1.65948e-39	C2	Axl
1.08186e-56	0.434155	0.448	0.217	1.4933e-52	C2	Cybb
5.44563e-65	0.576824	0.45	0.221	7.5166e-61	C2	Fam20c
3.42306e-54	0.300025	0.43	0.202	4.72485e-50	C2	Nab2
4.19443e-55	0.592812	0.565	0.338	5.78957e-51	C2	Lgals3
9.69657e-78	0.351507	0.344	0.118	1.33842e-73	C2	Pim1
2.44567e-49	0.295086	0.44	0.215	3.37575e-45	C2	Tob2
5.7934e-167	0.668879	0.984	0.763	7.99663e-163	C2	Btg1
1.92425e-49	0.284619	0.419	0.199	2.65604e-45	C2	Map3k8
7.52628e-53	0.346204	0.435	0.216	1.03885e-48	C2	Slc2a1
6.91661e-105	0.702327	0.296	0.077	9.54699e-101	C2	Phlda1
3.88915e-43	0.424345	0.489	0.272	5.36819e-39	C2	Cited2
2.86656e-262	0.915776	0.999	0.783	3.95671e-258	C2	Junb
4.15449e-90	0.384361	0.98	0.766	5.73444e-86	C2	Jund
1.04102e-53	0.368508	0.395	0.183	1.43692e-49	C2	Nlrp3
2.13946e-45	0.288788	0.433	0.221	2.95309e-41	C2	Plk3
2.56818e-39	0.318643	0.509	0.299	3.54485e-35	C2	Apbb2
7.74085e-36	0.273098	0.687	0.477	1.06847e-31	C2	Litaf
5.50603e-46	0.311457	0.429	0.221	7.59997e-42	C2	Mfsd12
1.44022e-90	1.18564	0.293	0.085	1.98794e-86	C2	Cxcl2
1.54533e-38	0.331776	0.548	0.341	2.13301e-34	C2	Lilrb4a
2.52144e-59	0.404901	0.356	0.149	3.48034e-55	C2	Marcksl1
5.12005e-88	0.482518	0.9	0.694	7.06721e-84	C2	Nfe2l2
7.94975e-59	0.338757	0.349	0.145	1.0973e-54	C2	Clic4
1.94608e-62	0.357663	0.328	0.124	2.68617e-58	C2	Malt1
1.88598e-42	0.474561	0.422	0.221	2.60322e-38	C2	Adamts1
1.79257e-40	0.293825	0.417	0.216	2.47428e-36	C2	Fosb
9.1868e-33	0.283275	0.746	0.547	1.26805e-28	C2	Asph
4.4034e-54	0.550163	0.361	0.165	6.07802e-50	C2	Plau
7.17346e-51	0.269519	0.338	0.144	9.90153e-47	C2	Siglecf
1.03229e-33	0.313885	0.534	0.341	1.42487e-29	C2	Rhoc
6.00025e-30	0.266682	0.556	0.365	8.28215e-26	C2	Tpm4
1.99132e-46	0.253372	0.337	0.147	2.74862e-42	C2	Tspan33
1.52625e-32	0.318741	0.641	0.451	2.10668e-28	C2	Aplp2
2.22612e-34	0.25071	0.423	0.237	3.07272e-30	C2	Itpkb
5.24114e-51	0.297055	0.307	0.124	7.23435e-47	C2	Hivep2
3.985e-53	0.254629	0.295	0.113	5.50049e-49	C2	Rnf19b
1.01764e-31	0.282997	0.455	0.278	1.40465e-27	C2	Alas1
3.31581e-47	0.272273	0.301	0.125	4.57681e-43	C2	Cd274
3.70089e-51	0.271081	0.287	0.113	5.10833e-47	C2	Ephx1
5.73663e-59	0.725367	0.27	0.096	7.91826e-55	C2	Cxcl10
4.76123e-58	0.27242	0.264	0.091	6.57192e-54	C2	H2-Q6
9.40411e-63	0.291268	0.254	0.081	1.29805e-58	C2	H2-Aa
2.62205e-252	0.994448	0.977	0.804	3.61922e-248	C2	Bcl2a1b
1.55139e-29	0.341395	0.665	0.498	2.14139e-25	C2	Crip1
4.33599e-31	0.270258	0.377	0.212	5.98497e-27	C2	Rab7b
9.56158e-60	0.40521	0.884	0.729	1.31979e-55	C2	Tgfb1
2.25534e-30	0.281027	0.367	0.214	3.11304e-26	C2	H2-Ab1
4.07353e-36	0.34694	0.278	0.13	5.62269e-32	C2	Il4i1
4.60668e-25	0.340752	0.396	0.248	6.3586e-21	C2	Pdgfa
6.33647e-20	0.271099	0.481	0.336	8.74623e-16	C2	Cd72
3.64839e-32	0.327801	0.849	0.71	5.03587e-28	C2	Srgn
2.12575e-30	0.28477	0.263	0.128	2.93418e-26	C2	Ptger4
2.11902e-44	0.343284	0.899	0.77	2.92488e-40	C2	Plek
5.80172e-40	0.580791	0.812	0.691	8.00811e-36	C2	Lpl
2.23681e-18	0.497871	0.58	0.466	3.08747e-14	C2	Gpr84
5.3832e-46	0.259393	0.984	0.876	7.43043e-42	C2	Rhob
7.43593e-17	0.276568	0.789	0.686	1.02638e-12	C2	Sgk1
5.16344e-45	0.27486	0.946	0.847	7.1271e-41	C2	Pabpc1
1.53738e-45	0.271161	0.968	0.883	2.12204e-41	C2	Ucp2
2.89089e-49	0.26259	0.982	0.906	3.9903e-45	C2	H2-K1
2.79192e-12	0.284574	0.922	0.862	3.85369e-08	C2	Hspa5
1.53243e-28	0.256816	0.973	0.915	2.11522e-24	C2	Sat1
5.50925e-59	0.308422	0.991	0.953	7.60441e-55	C2	H2-D1
2.20752e-88	0.471655	0.998	0.98	3.04704e-84	C2	H3f3b
2.86566e-30	0.275137	1	0.984	3.95547e-26	C2	Apoe
1.01298e-193	0.804775	0.557	0.222	1.39822e-189	D	Adgrg1
4.41075e-236	1.00071	0.83	0.497	6.08815e-232	D	Txnip
5.82378e-169	0.840614	0.561	0.233	8.03857e-165	D	Crybb1
0	1.20698	0.915	0.588	0	D	Siglech
0	1.09775	0.957	0.638	0	D	Tmem119
5.95231e-158	0.711044	0.462	0.175	8.21597e-154	D	Slc2a5
4.85515e-159	0.753169	0.733	0.455	6.70156e-155	D	Ccr5
8.69659e-228	0.84549	0.893	0.619	1.20039e-223	D	Dleu2
8.78915e-146	0.701327	0.668	0.398	1.21317e-141	D	Nrip1
1.80457e-174	0.766189	0.756	0.499	2.49085e-170	D	Zfhx3
0	1.11791	0.982	0.727	0	D	P2ry12
2.12743e-161	0.759077	0.686	0.432	2.93649e-157	D	Entpd1
2.22186e-174	0.770344	0.794	0.54	3.06683e-170	D	Hpgd
3.95272e-148	0.698769	0.699	0.446	5.45594e-144	D	Adap2
5.85542e-125	0.653123	0.406	0.157	8.08223e-121	D	Col27a1
2.86036e-141	0.699457	0.648	0.399	3.94816e-137	D	Fgd2
2.09683e-135	0.677772	0.693	0.445	2.89425e-131	D	Tanc2
2.43485e-179	0.739297	0.799	0.552	3.36083e-175	D	Srgap2
2.5083e-142	0.655281	0.351	0.107	3.46221e-138	D	Csmd3
5.29849e-175	0.760057	0.772	0.532	7.31351e-171	D	Ivns1abp
8.02719e-138	0.751756	0.654	0.414	1.10799e-133	D	Elmo1
2.02308e-107	0.866543	0.43	0.192	2.79246e-103	D	Sox4
7.49381e-163	0.700409	0.78	0.542	1.03437e-158	D	Frmd4a
5.81435e-121	0.663118	0.62	0.383	8.02555e-117	D	Il6ra
9.73482e-287	1.29417	0.931	0.697	1.3437e-282	D	Jun
9.52269e-102	0.627045	0.49	0.262	1.31442e-97	D	Numb
1.77852e-119	0.6457	0.348	0.121	2.45489e-115	D	Lrba
4.04293e-111	1.33967	0.622	0.396	5.58045e-107	D	Klf2
1.00277e-219	0.788172	0.873	0.648	1.38412e-215	D	Arhgap5
1.02802e-184	0.751626	0.834	0.609	1.41898e-180	D	Ptgs1
1.4493e-100	0.641331	0.587	0.368	2.00047e-96	D	Pik3r1
1.70806e-127	0.687191	0.697	0.48	2.35764e-123	D	Rhoh
6.68088e-159	0.817094	0.912	0.696	9.22162e-155	D	Btg2
6.90812e-130	0.612814	0.772	0.556	9.53527e-126	D	Ssh2
1.91775e-75	0.866208	0.568	0.357	2.64707e-71	D	Egr1
2.96252e-86	0.636402	0.556	0.346	4.08916e-82	D	Nav3
1.9109e-92	0.615213	0.53	0.322	2.63762e-88	D	Dock10
1.25423e-105	0.638061	0.596	0.388	1.73121e-101	D	Tmem173
1.02321e-103	0.61177	0.605	0.401	1.41233e-99	D	Susd3
4.92701e-101	0.583737	0.309	0.106	6.80075e-97	D	Camk2n1
1.34267e-149	0.717471	0.798	0.597	1.85329e-145	D	Maf
1.34196e-88	0.592898	0.558	0.357	1.8523e-84	D	Dock4
2.85697e-98	0.595057	0.607	0.406	3.94347e-94	D	Il10ra
6.64621e-194	0.86966	0.882	0.683	9.17377e-190	D	Ier5
7.41969e-78	0.542745	0.384	0.19	1.02414e-73	D	Rapgef5
5.42575e-96	0.63937	0.599	0.408	7.48916e-92	D	P2ry13
2.22342e-77	0.561255	0.498	0.309	3.06899e-73	D	Sall1
2.79359e-105	0.614914	0.688	0.5	3.85599e-101	D	Git2
1.39406e-111	0.639043	0.717	0.529	1.92423e-107	D	Mertk
2.52728e-74	0.56724	0.505	0.318	3.4884e-70	D	Ecscr
1.3865e-89	0.596235	0.611	0.425	1.91379e-85	D	Fscn1
3.13542e-139	0.632631	0.792	0.607	4.32782e-135	D	Slco2b1
4.60187e-70	0.551239	0.429	0.244	6.35196e-66	D	Fchsd2
4.32959e-100	0.526256	0.269	0.084	5.97613e-96	D	Gm10790
4.45967e-109	0.602652	0.77	0.587	6.15568e-105	D	Zfp36l2
2.29964e-91	0.613775	0.595	0.415	3.17419e-87	D	St3gal6
9.10219e-98	0.583192	0.66	0.483	1.25638e-93	D	Cttnbp2nl
5.43463e-64	0.529433	0.405	0.23	7.50142e-60	D	Nav2
2.3558e-68	0.535732	0.319	0.146	3.25171e-64	D	Gm47664
5.78777e-129	0.62732	0.753	0.581	7.98886e-125	D	Inpp5d
2.2261e-65	0.518249	0.36	0.188	3.07268e-61	D	Abca9
1.16496e-176	0.704882	0.869	0.697	1.608e-172	D	Mef2a
2.54943e-59	0.614095	0.47	0.3	3.51897e-55	D	Tsc22d3
7.10476e-80	0.561893	0.639	0.469	9.80671e-76	D	E230029C05Rik
8.25598e-61	0.481576	0.446	0.277	1.13957e-56	D	Dapp1
2.8979e-97	0.558144	0.655	0.487	3.99997e-93	D	Cmtm6
2.16188e-66	0.484856	0.547	0.379	2.98404e-62	D	Frmd4b
1.14025e-96	0.480596	0.839	0.671	1.57389e-92	D	AC149090.1
5.39502e-64	0.536245	0.462	0.295	7.44674e-60	D	Ankrd44
3.41539e-72	0.52371	0.578	0.411	4.71426e-68	D	Ophn1
9.28539e-53	0.436187	0.368	0.203	1.28166e-48	D	Adrb2
4.41814e-82	0.690142	0.748	0.584	6.09836e-78	D	Klf6
1.4368e-78	0.559955	0.55	0.389	1.98322e-74	D	Tpst2
2.61577e-63	0.541349	0.482	0.321	3.61054e-59	D	1700017B05Rik
5.9013e-167	0.671053	0.892	0.733	8.14557e-163	D	Glul
1.84779e-95	0.563404	0.76	0.601	2.55051e-91	D	Pou2f2
6.20481e-88	0.531437	0.668	0.509	8.56449e-84	D	Arhgap45
2.97279e-74	0.535471	0.617	0.458	4.10334e-70	D	Jmjd1c
5.4016e-87	0.571701	0.654	0.496	7.45583e-83	D	Pag1
1.76425e-62	0.552082	0.466	0.308	2.43519e-58	D	Klf3
1.26422e-59	0.524063	0.449	0.292	1.74501e-55	D	Slc16a6
7.87631e-80	0.519011	0.643	0.487	1.08717e-75	D	Slc29a3
2.84404e-69	0.494321	0.582	0.426	3.92563e-65	D	Pde3b
2.73521e-57	0.44347	0.3	0.146	3.77542e-53	D	Snta1
2.55111e-225	1.04848	0.92	0.767	3.5213e-221	D	Jund
2.10101e-56	0.472046	0.296	0.145	2.90003e-52	D	Eef2k
1.74553e-77	0.556224	0.605	0.455	2.40935e-73	D	Foxn3
7.83098e-52	0.477836	0.405	0.256	1.08091e-47	D	Zfp710
2.33136e-55	0.401424	0.268	0.119	3.21797e-51	D	Clec4a2
3.29625e-52	0.518438	0.408	0.261	4.54982e-48	D	Irf2bpl
9.15988e-55	0.472069	0.506	0.359	1.26434e-50	D	Crlf3
1.05095e-56	0.508582	0.485	0.338	1.45063e-52	D	Rcsd1
1.43802e-172	0.623626	0.881	0.735	1.9849e-168	D	Ifngr1
1.21698e-57	0.494474	0.51	0.364	1.6798e-53	D	Tm6sf1
3.47891e-53	0.465506	0.444	0.301	4.80194e-49	D	Arid1a
1.15103e-64	0.492454	0.566	0.424	1.58876e-60	D	Mycbp2
1.40305e-62	0.498625	0.583	0.441	1.93663e-58	D	Ighm
1.49321e-83	0.53859	0.875	0.734	2.06108e-79	D	Zfp36
2.41462e-48	0.414846	0.278	0.139	3.3329e-44	D	Il16
2.05812e-50	0.450543	0.252	0.114	2.84083e-46	D	Adrb1
1.16228e-86	0.542169	0.684	0.547	1.60429e-82	D	Cd33
1.65931e-54	0.434338	0.583	0.446	2.29035e-50	D	Pnisr
1.56341e-140	0.614496	0.874	0.738	2.15797e-136	D	Tgfbr1
8.62102e-43	0.422035	0.377	0.241	1.18996e-38	D	March1
2.56726e-44	0.480464	0.308	0.172	3.54359e-40	D	Gm15503
5.47832e-53	0.4437	0.603	0.468	7.56173e-49	D	Dennd4a
3.47425e-53	0.527543	0.537	0.404	4.7955e-49	D	Herpud1
1.05621e-68	0.494734	0.671	0.538	1.45788e-64	D	Skil
1.45926e-44	0.452364	0.408	0.275	2.01421e-40	D	Arid4a
2.61723e-46	0.458346	0.444	0.312	3.61257e-42	D	Chd9
2.1636e-55	0.512529	0.528	0.398	2.98642e-51	D	Usp2
4.49392e-37	0.464116	0.354	0.224	6.20296e-33	D	Cebpd
5.55323e-184	0.759238	0.93	0.801	7.66513e-180	D	Kctd12
3.83939e-40	0.449476	0.356	0.227	5.29952e-36	D	Slc1a3
8.33477e-62	0.461877	0.67	0.542	1.15045e-57	D	Clk1
2.53883e-39	0.418161	0.313	0.186	3.50435e-35	D	Arap3
1.37681e-178	0.607886	0.915	0.789	1.90041e-174	D	Lpcat2
2.66148e-94	0.618516	0.913	0.788	3.67363e-90	D	Junb
3.32087e-28	0.436623	0.467	0.342	4.5838e-24	D	Socs3
1.59105e-83	0.50581	0.696	0.572	2.19613e-79	D	Otulinl
8.35613e-38	0.407118	0.425	0.301	1.1534e-33	D	Il17ra
2.01474e-90	0.560788	0.707	0.584	2.78095e-86	D	Cfh
5.7508e-48	0.441936	0.501	0.378	7.93783e-44	D	Hps4
5.95409e-37	0.403655	0.325	0.202	8.21843e-33	D	Mob3c
3.01182e-27	0.309107	0.413	0.291	4.15722e-23	D	Il1a
1.53454e-263	0.75967	0.965	0.843	2.11813e-259	D	Vsir
3.45451e-47	0.438046	0.51	0.389	4.76825e-43	D	Rock2
1.79055e-45	0.474269	0.482	0.362	2.47149e-41	D	St3gal5
5.10421e-36	0.372315	0.27	0.151	7.04534e-32	D	Soga1
2.25292e-49	0.452816	0.487	0.368	3.10971e-45	D	Gna15
2.6594e-46	0.461605	0.483	0.365	3.67077e-42	D	Dock8
1.03118e-32	0.351089	0.468	0.35	1.42334e-28	D	Mir99ahg
1.04807e-33	0.490282	0.284	0.167	1.44665e-29	D	Gm26532
1.47207e-32	0.429874	0.328	0.211	2.03189e-28	D	Zbtb20
2.61338e-76	0.483076	0.696	0.58	3.60725e-72	D	Celf2
6.27406e-34	0.379144	0.269	0.153	8.66009e-30	D	Gm10138
6.19905e-101	0.524348	0.782	0.666	8.55655e-97	D	Fermt3
1.03025e-37	0.44773	0.365	0.249	1.42206e-33	D	Rtn4rl1
3.971e-41	0.446246	0.475	0.36	5.48117e-37	D	9930111J21Rik2
1.19293e-40	0.421293	0.454	0.339	1.6466e-36	D	Senp2
1.69514e-35	0.386566	0.251	0.136	2.33981e-31	D	Klf7
3.4919e-44	0.467507	0.468	0.354	4.81987e-40	D	Rps6ka1
8.81296e-42	0.445695	0.435	0.321	1.21645e-37	D	Akirin2
4.98175e-62	0.412301	0.71	0.596	6.87632e-58	D	Luc7l2
9.29311e-43	0.42902	0.47	0.357	1.28273e-38	D	Vgll4
1.57725e-80	0.527418	0.719	0.606	2.17708e-76	D	Tra2b
2.39297e-47	0.467845	0.492	0.379	3.30301e-43	D	Ikzf1
3.32618e-33	0.384223	0.305	0.192	4.59112e-29	D	Adora3
7.06293e-28	0.313927	0.354	0.241	9.74896e-24	D	Pid1
5.61995e-40	0.619387	0.7	0.588	7.75721e-36	D	Fos
1.58875e-38	0.44728	0.406	0.294	2.19295e-34	D	Gm2629
1.194e-60	0.373655	0.842	0.73	1.64808e-56	D	Zeb2
0	1.06137	0.983	0.872	0	D	Rhob
2.50557e-110	0.535088	0.802	0.691	3.45844e-106	D	F11r
5.69906e-36	0.431565	0.393	0.282	7.86641e-32	D	Tfe3
1.95551e-37	0.420871	0.411	0.301	2.69919e-33	D	Ctc1
6.2847e-32	0.395884	0.279	0.169	8.67477e-28	D	Cysltr1
1.87516e-37	0.440756	0.453	0.343	2.58828e-33	D	Zbtb7a
8.43669e-37	0.422929	0.45	0.34	1.16452e-32	D	Mgat4a
1.22347e-37	0.406555	0.47	0.361	1.68875e-33	D	Rbm5
6.31184e-32	0.395943	0.28	0.171	8.71224e-28	D	Vps37b
2.12122e-64	0.474344	0.677	0.568	2.92792e-60	D	Pnrc1
6.4605e-60	0.448342	0.656	0.547	8.91742e-56	D	Srsf5
8.97064e-32	0.368733	0.355	0.246	1.23822e-27	D	Slc12a9
3.68626e-41	0.446177	0.589	0.481	5.08815e-37	D	Smad7
7.05446e-34	0.403025	0.382	0.274	9.73727e-30	D	Nfam1
6.54002e-31	0.361135	0.284	0.177	9.02718e-27	D	Idh2
6.83209e-41	0.444989	0.454	0.347	9.43034e-37	D	Sipa1
1.09823e-30	0.365078	0.258	0.152	1.51589e-26	D	Dusp7
8.1162e-31	0.410322	0.44	0.334	1.12028e-26	D	Tent5a
1.96742e-29	0.39242	0.312	0.206	2.71563e-25	D	Pwwp2a
2.33249e-38	0.421757	0.512	0.407	3.21953e-34	D	Zcchc7
3.72527e-30	0.389128	0.293	0.189	5.142e-26	D	0610040J01Rik
1.52351e-27	0.338677	0.276	0.174	2.1029e-23	D	Fbrsl1
8.76668e-86	0.501293	0.773	0.671	1.21006e-81	D	Snrnp70
3.17243e-79	0.500061	0.717	0.615	4.37891e-75	D	Wnk1
1.33469e-34	0.399339	0.524	0.423	1.84227e-30	D	Dusp6
7.82467e-27	0.378871	0.34	0.239	1.08004e-22	D	4632427E13Rik
1.18095e-59	0.499484	0.615	0.514	1.63006e-55	D	Pnp
6.64477e-54	0.461064	0.582	0.481	9.17177e-50	D	Rab3il1
1.85469e-38	0.415337	0.508	0.407	2.56003e-34	D	Kmt2e
3.902e-53	0.463324	0.602	0.502	5.38593e-49	D	Map4k4
1.42057e-30	0.392622	0.378	0.278	1.96082e-26	D	Zfp652
3.94613e-26	0.341776	0.267	0.168	5.44685e-22	D	Akna
7.29587e-34	0.404925	0.43	0.331	1.00705e-29	D	Herc2
1.47976e-33	0.398018	0.485	0.387	2.04251e-29	D	Tmcc3
1.20383e-27	0.374933	0.333	0.236	1.66164e-23	D	Rassf2
8.68979e-23	0.342643	0.323	0.226	1.19945e-18	D	Tagap
5.21237e-23	0.340157	0.264	0.167	7.19464e-19	D	Kdm6b
2.6989e-27	0.38616	0.373	0.276	3.72529e-23	D	Ppp1r10
1.59163e-37	0.452793	0.46	0.364	2.19692e-33	D	Cd164
2.3925e-32	0.39208	0.415	0.319	3.30236e-28	D	Gtf2h2
0	1.07183	0.99	0.894	0	D	Selplg
1.45703e-32	0.403462	0.444	0.348	2.01114e-28	D	Phf14
9.48433e-32	0.399214	0.43	0.334	1.30912e-27	D	Mtus1
1.45711e-41	0.40437	0.527	0.432	2.01125e-37	D	Zmiz1
3.4573e-30	0.38619	0.406	0.311	4.77211e-26	D	Fli1
2.22518e-26	0.359028	0.313	0.218	3.07141e-22	D	Dip2b
2.3441e-24	0.332715	0.323	0.228	3.23556e-20	D	Tnrc6b
2.309e-300	0.703852	1	0.905	3.18711e-296	D	Malat1
7.67542e-52	0.441258	0.648	0.553	1.05944e-47	D	Ptpre
7.69493e-36	0.433808	0.446	0.351	1.06213e-31	D	Cxxc5
9.64435e-25	0.325776	0.26	0.166	1.33121e-20	D	Pcf11
7.63382e-30	0.412923	0.387	0.294	1.0537e-25	D	Tab2
2.42497e-26	0.381653	0.416	0.323	3.34718e-22	D	Resf1
3.79873e-193	0.679013	0.964	0.871	5.24339e-189	D	Gpr34
4.45761e-81	0.514696	0.757	0.664	6.15284e-77	D	Picalm
2.10988e-55	0.476155	0.606	0.513	2.91227e-51	D	Tacc1
1.53839e-28	0.457545	0.453	0.362	2.12343e-24	D	Pdgfb
2.08036e-30	0.38629	0.421	0.33	2.87152e-26	D	Mkln1
2.02453e-22	0.322352	0.255	0.165	2.79446e-18	D	Atf7ip
4.46954e-119	0.475546	0.925	0.836	6.16931e-115	D	Rbm39
5.32841e-24	0.350132	0.322	0.233	7.3548e-20	D	Mgat1
8.88697e-35	0.418032	0.5	0.411	1.22667e-30	D	Wsb1
4.24645e-35	0.398463	0.528	0.44	5.86137e-31	D	Arhgap17
7.67276e-25	0.36027	0.337	0.249	1.05907e-20	D	Rogdi
7.23245e-23	0.348658	0.277	0.189	9.98295e-19	D	Rnf167
1.67199e-22	0.379723	0.322	0.234	2.30784e-18	D	Sall3
2.07543e-22	0.337925	0.297	0.209	2.86472e-18	D	Ppp1r9a
3.6116e-22	0.323884	0.252	0.164	4.9851e-18	D	Med13l
1.27732e-26	0.420241	0.373	0.285	1.76308e-22	D	Acox3
7.42646e-23	0.335265	0.298	0.211	1.02507e-18	D	Kdm2b
1.03756e-22	0.356224	0.319	0.233	1.43215e-18	D	Kif21b
1.48301e-113	0.471446	0.912	0.826	2.047e-109	D	Pld4
1.2213e-26	0.374571	0.37	0.284	1.68576e-22	D	Itpr2
2.24336e-37	0.398369	0.509	0.424	3.09651e-33	D	Cmtm7
1.80609e-23	0.363824	0.332	0.247	2.49295e-19	D	Lpin2
4.54642e-23	0.34785	0.393	0.308	6.27543e-19	D	Zfp292
1.51908e-147	0.57527	0.905	0.82	2.09678e-143	D	Epb41l2
7.80326e-15	0.317378	0.607	0.522	1.07708e-10	D	Dusp1
1.89023e-32	0.407687	0.472	0.388	2.60908e-28	D	Cd2ap
1.47474e-22	0.339489	0.325	0.241	2.03558e-18	D	Iffo1
1.39461e-40	0.327481	0.782	0.698	1.92498e-36	D	Rgs2
1.15462e-20	0.3258	0.29	0.206	1.59373e-16	D	Tsc22d2
9.85218e-34	0.423994	0.456	0.373	1.3599e-29	D	Phyhd1
3.72117e-23	0.310543	0.516	0.435	5.13633e-19	D	Icam1
2.46204e-22	0.339326	0.369	0.288	3.39836e-18	D	Gal3st4
3.07846e-23	0.329988	0.369	0.288	4.2492e-19	D	Akap8l
4.16422e-82	0.473828	0.804	0.724	5.74787e-78	D	Mbnl1
9.15927e-25	0.380031	0.398	0.318	1.26425e-20	D	Cbl
2.81495e-26	0.379015	0.413	0.333	3.88547e-22	D	Ppcdc
7.08804e-20	0.348143	0.283	0.203	9.78362e-16	D	Dennd1c
1.05414e-23	0.338677	0.386	0.306	1.45503e-19	D	Acp2
1.35026e-19	0.323905	0.252	0.172	1.86377e-15	D	Plcl2
1.94615e-29	0.396683	0.487	0.407	2.68628e-25	D	Slc38a2
8.74204e-84	0.456189	0.809	0.73	1.20666e-79	D	Smap2
3.72397e-28	0.371864	0.433	0.354	5.1402e-24	D	Slc7a8
5.04277e-23	0.347007	0.386	0.307	6.96053e-19	D	Rbm26
8.57022e-22	0.319125	0.401	0.322	1.18295e-17	D	Ttc14
6.34833e-160	0.502994	0.961	0.882	8.7626e-156	D	Son
5.00976e-20	0.346858	0.365	0.286	6.91497e-16	D	Chd2
4.46159e-146	0.542563	0.941	0.863	6.15833e-142	D	Qk
1.26696e-54	0.428689	0.667	0.589	1.74879e-50	D	Bin2
1.96738e-19	0.322434	0.288	0.21	2.71558e-15	D	Mfap3
7.45287e-36	0.427989	0.53	0.452	1.02872e-31	D	Fam102b
3.28552e-26	0.353375	0.439	0.361	4.535e-22	D	Arhgef1
3.73546e-18	0.292549	0.351	0.273	5.15605e-14	D	Ptafr
2.63141e-19	0.341043	0.296	0.218	3.63214e-15	D	Foxp1
6.39364e-41	0.399008	0.642	0.564	8.82514e-37	D	Mylip
1.69004e-21	0.329945	0.366	0.288	2.33276e-17	D	Ubn2
2.2805e-48	0.409454	0.662	0.585	3.14777e-44	D	P2ry6
3.30586e-22	0.344528	0.348	0.271	4.56307e-18	D	Trim8
1.25241e-18	0.3368	0.407	0.33	1.7287e-14	D	Neurl3
5.30859e-18	0.284286	0.259	0.182	7.32745e-14	D	Tut4
6.91357e-110	0.49994	0.85	0.773	9.5428e-106	D	Tsc22d4
7.36334e-40	0.31922	0.851	0.774	1.01636e-35	D	Btg1
1.255e-37	0.383773	0.587	0.511	1.73228e-33	D	Arglu1
3.23253e-20	0.461164	0.326	0.251	4.46186e-16	D	Tmx4
6.12895e-30	0.402458	0.454	0.379	8.45978e-26	D	Il21r
2.79821e-33	0.362226	0.55	0.475	3.86237e-29	D	Rsrc2
2.78398e-21	0.339121	0.397	0.322	3.84272e-17	D	Ash1l
2.78515e-17	0.291949	0.276	0.201	3.84434e-13	D	Zswim6
1.27678e-21	0.358318	0.357	0.282	1.76233e-17	D	Il6st
5.40618e-20	0.341796	0.354	0.279	7.46215e-16	D	Bach1
5.32008e-31	0.4883	0.692	0.618	7.3433e-27	D	Atf3
2.50923e-28	0.403221	0.438	0.364	3.46349e-24	D	Prex1
2.6902e-17	0.303269	0.269	0.195	3.71328e-13	D	Rb1cc1
0	1.06507	0.996	0.922	0	D	Cx3cr1
1.13856e-16	0.280533	0.284	0.211	1.57155e-12	D	Tspan13
1.15264e-19	0.369303	0.338	0.265	1.59099e-15	D	Tubgcp5
1.05535e-25	0.364363	0.458	0.385	1.4567e-21	D	Ktn1
6.52625e-18	0.325621	0.281	0.208	9.00819e-14	D	Inka1
6.18322e-28	0.363852	0.483	0.41	8.5347e-24	D	Arhgap30
1.402e-27	0.348772	0.503	0.431	1.93518e-23	D	Dst
4.45718e-26	0.34609	0.498	0.426	6.15225e-22	D	Tra2a
6.16025e-19	0.314629	0.324	0.252	8.50299e-15	D	Cd82
1.48304e-44	0.425807	0.585	0.513	2.04704e-40	D	Pip4p1
1.45969e-15	0.293793	0.28	0.209	2.0148e-11	D	Lpar6
1.91239e-40	0.410553	0.592	0.521	2.63967e-36	D	Cebpz
1.73522e-34	0.388029	0.536	0.466	2.39513e-30	D	Pura
8.8342e-21	0.370157	0.369	0.299	1.21938e-16	D	Specc1
2.15146e-16	0.308646	0.276	0.206	2.96966e-12	D	Atp6v0a2
2.20726e-66	0.457165	0.717	0.647	3.04669e-62	D	Abi3
1.96736e-16	0.335956	0.3	0.231	2.71554e-12	D	Hps3
1.64109e-24	0.356089	0.446	0.377	2.26519e-20	D	Bclaf1
3.38375e-17	0.312995	0.304	0.235	4.67059e-13	D	Kcnk6
3.8511e-99	0.478208	0.839	0.77	5.31567e-95	D	Scamp2
8.20023e-18	0.337573	0.278	0.21	1.13188e-13	D	Mfng
2.48904e-15	0.305703	0.288	0.22	3.43563e-11	D	Snx29
2.49519e-32	0.364707	0.524	0.456	3.44411e-28	D	Snx18
1.56386e-27	0.376901	0.482	0.414	2.1586e-23	D	Cebpg
3.72338e-28	0.348094	0.768	0.7	5.13938e-24	D	Zfp36l1
7.13247e-20	0.343251	0.356	0.288	9.84495e-16	D	Fez2
3.49967e-26	0.302907	0.581	0.513	4.83059e-22	D	Ccnl1
1.89868e-17	0.395912	0.557	0.49	2.62074e-13	D	Ier2
8.67966e-21	0.358461	0.39	0.323	1.19805e-16	D	Tut7
3.05372e-23	0.34349	0.449	0.382	4.21505e-19	D	Hck
1.58884e-18	0.31884	0.374	0.307	2.19307e-14	D	Camk2d
5.22007e-24	0.317596	0.485	0.418	7.20526e-20	D	Chd7
4.90627e-17	0.306424	0.322	0.255	6.77213e-13	D	Zfp644
1.11751e-15	0.305743	0.271	0.204	1.5425e-11	D	Sh3bp1
4.14263e-18	0.339583	0.342	0.276	5.71807e-14	D	Itch
9.2793e-26	0.336855	0.493	0.427	1.28082e-21	D	Cflar
1.70747e-17	0.333477	0.319	0.253	2.35682e-13	D	Sla
1.23682e-17	0.311394	0.345	0.279	1.70718e-13	D	Gpatch8
3.21024e-16	0.291684	0.35	0.284	4.43109e-12	D	Ints6l
4.96511e-14	0.287265	0.264	0.198	6.85333e-10	D	Klk8
8.22773e-177	0.531273	0.99	0.924	1.13567e-172	D	Mef2c
4.12563e-76	0.403673	0.844	0.778	5.6946e-72	D	Srrm2
4.77746e-28	0.370202	0.509	0.444	6.59433e-24	D	Rin2
8.36351e-15	0.309887	0.336	0.271	1.15442e-10	D	Impact
1.88123e-14	0.279629	0.252	0.187	2.59667e-10	D	Cep170
1.54758e-62	0.391032	0.825	0.761	2.13613e-58	D	Itgam
8.37094e-22	0.336724	0.45	0.386	1.15544e-17	D	Ythdc1
5.54134e-15	0.289313	0.29	0.226	7.64871e-11	D	Cdk12
1.85337e-101	0.529235	0.839	0.775	2.55821e-97	D	Hpgds
4.93609e-36	0.372204	0.587	0.523	6.81328e-32	D	Pla2g15
6.62584e-118	0.483706	0.93	0.867	9.14565e-114	D	Lair1
6.30543e-15	0.359467	0.3	0.237	8.70339e-11	D	Tuba1a
8.30272e-14	0.288642	0.285	0.222	1.14602e-09	D	Nuak1
6.65527e-17	0.341427	0.314	0.251	9.18626e-13	D	Taz
1.10552e-19	0.339521	0.389	0.326	1.52594e-15	D	Nr3c1
6.23737e-13	0.316149	0.306	0.243	8.60944e-09	D	Gm43305
2.03201e-14	0.298503	0.266	0.203	2.80478e-10	D	Kat6a
2.69813e-14	0.285881	0.264	0.201	3.72422e-10	D	Rlim
4.03368e-52	0.467263	0.617	0.554	5.56769e-48	D	Csnk1e
4.2306e-17	0.329075	0.345	0.283	5.83949e-13	D	Hnrnph1
1.29622e-18	0.304026	0.388	0.326	1.78917e-14	D	Fcgrt
3.49634e-16	0.305582	0.343	0.282	4.82599e-12	D	Zdhhc20
1.94798e-28	0.378584	0.498	0.438	2.6888e-24	D	Itga6
1.07071e-13	0.299395	0.256	0.196	1.47791e-09	D	Nfix
9.63437e-20	0.357613	0.413	0.354	1.32983e-15	D	Bptf
1.49024e-13	0.297226	0.287	0.228	2.05698e-09	D	1810026B05Rik
4.21998e-13	0.266092	0.338	0.279	5.82483e-09	D	Rel
2.70184e-14	0.318159	0.297	0.238	3.72934e-10	D	Ep300
6.32744e-54	0.421811	0.691	0.633	8.73377e-50	D	Wasf2
1.23313e-87	0.387576	0.916	0.858	1.70209e-83	D	Cyth4
1.11234e-41	0.38134	0.657	0.599	1.53536e-37	D	Macf1
1.5079e-13	0.284606	0.288	0.23	2.08136e-09	D	Pik3cg
1.13281e-12	0.278875	0.268	0.21	1.56362e-08	D	Rnf216
1.22706e-12	0.267586	0.28	0.222	1.69372e-08	D	Setd5
5.0375e-16	0.323269	0.336	0.278	6.95326e-12	D	B4galt1
2.0379e-13	0.288234	0.289	0.231	2.81291e-09	D	Pan3
1.49618e-50	0.367026	0.743	0.685	2.06518e-46	D	Fus
2.72855e-22	0.303202	0.555	0.498	3.76622e-18	D	Nktr
4.37201e-13	0.282604	0.266	0.209	6.03469e-09	D	Msl1
4.81094e-11	0.330103	0.343	0.286	6.64054e-07	D	Cited2
2.47119e-17	0.308381	0.384	0.327	3.41099e-13	D	Lcp2
1.87813e-14	0.29796	0.309	0.252	2.59238e-10	D	Fam91a1
1.58474e-12	0.286629	0.284	0.228	2.18742e-08	D	Tet3
2.45297e-21	0.361188	0.429	0.373	3.38584e-17	D	Eif4a2
3.39822e-12	0.292664	0.251	0.195	4.69056e-08	D	Fam193a
1.78949e-160	0.471836	0.999	0.943	2.47003e-156	D	Sparc
5.29385e-23	0.379383	0.514	0.459	7.3071e-19	D	Zfand5
1.51762e-17	0.331558	0.358	0.303	2.09477e-13	D	Gsdmd
1.28573e-14	0.307312	0.362	0.307	1.7747e-10	D	Map11
1.47487e-11	0.278861	0.268	0.214	2.03576e-07	D	Clasp2
1.8317e-11	0.265318	0.256	0.202	2.52829e-07	D	Kmt2c
9.70649e-266	0.698712	0.988	0.934	1.33979e-261	D	Ddx5
9.95874e-45	0.401516	0.623	0.569	1.3746e-40	D	Orai1
5.40425e-17	0.348528	0.349	0.296	7.45949e-13	D	Cul1
5.68401e-15	0.309342	0.365	0.312	7.84564e-11	D	Fcho2
2.26673e-12	0.297061	0.295	0.242	3.12877e-08	D	Nufip2
5.53958e-12	0.278254	0.256	0.203	7.64628e-08	D	Trim26
0	0.736573	0.99	0.937	0	D	Serinc3
8.83777e-23	0.379266	0.454	0.402	1.21988e-18	D	Ogfrl1
5.0343e-18	0.324646	0.369	0.317	6.94884e-14	D	Grk2
1.40108e-15	0.324602	0.361	0.309	1.93391e-11	D	Pten
1.66248e-14	0.296686	0.353	0.301	2.29472e-10	D	Peli1
1.11059e-34	0.36904	0.597	0.545	1.53295e-30	D	Purb
2.0134e-11	0.266736	0.269	0.218	2.7791e-07	D	Numa1
8.89543e-29	0.358555	0.52	0.469	1.22784e-24	D	Ctsf
4.25222e-14	0.309648	0.324	0.273	5.86934e-10	D	Casp8
4.46395e-12	0.276884	0.306	0.255	6.16159e-08	D	Gcnt1
4.98289e-33	0.36164	0.686	0.637	6.87789e-29	D	Gpr183
2.3897e-11	0.316123	0.266	0.217	3.2985e-07	D	Ttc28
1.11896e-15	0.338687	0.363	0.314	1.5445e-11	D	Tifa
2.93944e-21	0.336558	0.507	0.458	4.05731e-17	D	Prpf38b
1.1085e-10	0.283819	0.266	0.218	1.53006e-06	D	Aftph
6.39243e-11	0.266288	0.266	0.218	8.82347e-07	D	Lrch4
6.12328e-11	0.264868	0.284	0.236	8.45196e-07	D	N4bp1
3.4476e-25	0.358562	0.488	0.44	4.75873e-21	D	Commd8
1.06504e-11	0.266927	0.323	0.275	1.47007e-07	D	Tle4
2.12123e-10	0.262603	0.251	0.203	2.92793e-06	D	Slc4a7
2.82757e-38	0.358905	0.728	0.68	3.90289e-34	D	Rsrp1
2.78528e-20	0.337687	0.441	0.394	3.84452e-16	D	Snx20
5.21442e-13	0.307033	0.361	0.314	7.19747e-09	D	Hook3
5.34158e-54	0.421622	0.74	0.693	7.37298e-50	D	Golm1
9.45373e-20	0.327422	0.466	0.42	1.3049e-15	D	Srsf7
1.95145e-10	0.258036	0.269	0.223	2.69359e-06	D	Tnfrsf13b
7.16868e-25	0.33131	0.507	0.461	9.89493e-21	D	Irf5
1.10208e-11	0.28231	0.294	0.248	1.5212e-07	D	Gmip
5.21705e-10	0.254313	0.253	0.207	7.2011e-06	D	Hfe
1.19554e-217	0.826765	0.967	0.921	1.6502e-213	D	Ubc
5.13105e-19	0.333465	0.47	0.425	7.08239e-15	D	Mafg
3.94795e-10	0.315279	0.264	0.219	5.44936e-06	D	G530011O06Rik
8.72947e-11	0.288465	0.279	0.234	1.20493e-06	D	Tmem63a
1.0681e-09	0.277826	0.276	0.231	1.4743e-05	D	Tob2
6.43004e-11	0.258818	0.304	0.259	8.87539e-07	D	March7
2.93717e-33	0.329253	0.673	0.629	4.05418e-29	D	Ncf1
9.92258e-10	0.269126	0.258	0.214	1.36961e-05	D	Fmnl1
1.85531e-13	0.276005	0.376	0.332	2.56089e-09	D	Ddx17
1.3646e-57	0.360908	0.845	0.801	1.88356e-53	D	Apbb1ip
8.1066e-72	0.398986	0.883	0.84	1.11895e-67	D	Sirpa
9.55415e-28	0.31798	0.575	0.532	1.31876e-23	D	Bmp2k
3.76343e-10	0.270561	0.278	0.235	5.19466e-06	D	Fmnl3
8.4838e-15	0.321999	0.361	0.318	1.17102e-10	D	Pip4k2a
2.39378e-17	0.314745	0.425	0.382	3.30414e-13	D	Irf2
1.79192e-11	0.272844	0.31	0.267	2.47339e-07	D	Akr1b10
3.86099e-11	0.263737	0.327	0.285	5.32932e-07	D	N4bp2l2
1.19604e-77	0.414093	0.872	0.83	1.6509e-73	D	Mtdh
7.24473e-20	0.352245	0.462	0.421	9.99991e-16	D	Nipbl
1.04632e-19	0.325603	0.471	0.43	1.44424e-15	D	Rdx
5.91841e-18	0.327779	0.426	0.385	8.16918e-14	D	Ddx6
2.97693e-10	0.287691	0.296	0.255	4.10906e-06	D	Hhex
5.09172e-32	0.318695	0.775	0.735	7.0281e-28	D	Mcl1
6.36589e-26	0.318399	0.538	0.498	8.78683e-22	D	Arrb2
1.58392e-11	0.26514	0.344	0.304	2.18628e-07	D	Ccnl2
6.91946e-10	0.267225	0.319	0.28	9.55093e-06	D	Rbbp6
1.45701e-09	0.255339	0.313	0.274	2.0111e-05	D	Dhx9
8.09015e-118	0.437441	0.967	0.928	1.11668e-113	D	Selenop
2.60238e-11	0.272289	0.336	0.298	3.59207e-07	D	Rap1gds1
2.70931e-17	0.313566	0.426	0.388	3.73966e-13	D	Csk
1.26177e-09	0.268232	0.29	0.252	1.74162e-05	D	Cmklr1
6.25705e-49	0.398537	0.741	0.703	8.63661e-45	D	Scoc
3.69609e-27	0.31993	0.571	0.534	5.10171e-23	D	Prkcd
4.50799e-08	0.2529	0.253	0.216	0.000622238	D	Tspan7
1.67464e-13	0.27687	0.385	0.348	2.31151e-09	D	Ppp1r12a
1.24773e-11	0.292443	0.325	0.289	1.72224e-07	D	Pald1
8.57261e-08	0.250339	0.258	0.222	0.00118328	D	Arid4b
1.66185e-22	0.341966	0.502	0.466	2.29385e-18	D	Man1a2
4.49804e-09	0.255223	0.29	0.254	6.20864e-05	D	Cybc1
1.25502e-119	0.410979	0.975	0.939	1.73231e-115	D	Rrbp1
3.15062e-59	0.352751	0.868	0.832	4.3488e-55	D	Ckb
4.59561e-18	0.287504	0.517	0.482	6.34331e-14	D	Rasgrp3
2.2322e-09	0.254461	0.292	0.257	3.08111e-05	D	Lrrc3
1.37952e-20	0.258132	0.611	0.576	1.90416e-16	D	Ankrd11
4.8853e-77	0.352465	0.903	0.869	6.74317e-73	D	Bin1
1.27096e-15	0.314572	0.464	0.43	1.75431e-11	D	Ddx3x
8.73563e-10	0.251894	0.327	0.293	1.20578e-05	D	Slc15a4
6.01764e-13	0.30357	0.428	0.394	8.30614e-09	D	Lst1
1.09722e-10	0.276207	0.334	0.3	1.51449e-06	D	Ddx50
8.62528e-58	0.390656	0.781	0.748	1.19055e-53	D	Lyn
6.1656e-15	0.311932	0.423	0.39	8.51038e-11	D	Gsk3b
2.72563e-13	0.262413	0.439	0.406	3.76218e-09	D	Mbnl2
1.77793e-23	0.322243	0.584	0.551	2.45408e-19	D	Tcf4
9.99352e-283	0.623772	0.998	0.966	1.37941e-278	D	Marcks
4.37231e-10	0.258138	0.357	0.325	6.0351e-06	D	Ogt
4.46683e-08	0.25635	0.29	0.258	0.000616557	D	Hivep3
4.41304e-10	0.254853	0.352	0.32	6.09132e-06	D	Elf1
4.245e-10	0.253293	0.357	0.325	5.85937e-06	D	Celf1
9.24422e-09	0.287746	0.296	0.265	0.000127598	D	B230219D22Rik
1.15972e-12	0.268321	0.413	0.384	1.60076e-08	D	Ccdc50
3.45234e-08	0.25878	0.314	0.285	0.000476526	D	Phf3
8.41161e-24	0.33374	0.572	0.544	1.16106e-19	D	Sfpq
2.259e-17	0.279373	0.459	0.431	3.1181e-13	D	Twf2
7.93595e-05	0.261283	0.26	0.232	1	D	Fosb
1.27986e-38	0.347106	0.719	0.691	1.7666e-34	D	Hk2
0.000513976	0.437546	0.264	0.237	1	D	Adamts1
1.47688e-15	0.30831	0.433	0.406	2.03853e-11	D	Tspan14
1.88558e-78	0.468341	0.95	0.924	2.60267e-74	D	Mafb
1.00159e-131	0.452439	0.954	0.928	1.3825e-127	D	Unc93b1
7.2168e-20	0.28458	0.615	0.589	9.96134e-16	D	Alox5ap
1.15252e-06	0.25786	0.252	0.226	0.0159083	D	Rsf1
1.14963e-36	0.333726	0.704	0.678	1.58683e-32	D	Sf3b1
1.43765e-09	0.254669	0.357	0.332	1.98439e-05	D	Tox4
1.82146e-09	0.282313	0.326	0.302	2.51416e-05	D	Ptp4a3
1.05713e-09	0.266094	0.336	0.312	1.45916e-05	D	Hnrnph2
1.58937e-12	0.259384	0.411	0.387	2.19381e-08	D	Vasp
4.00957e-15	0.252992	0.608	0.584	5.53441e-11	D	Irf2bp2
3.73938e-13	0.317806	0.433	0.409	5.16146e-09	D	Brd2
2.23463e-15	0.266687	0.535	0.512	3.08446e-11	D	Runx1
4.36255e-18	0.313506	0.485	0.462	6.02162e-14	D	Evl
8.31237e-47	0.28388	0.97	0.947	1.14736e-42	D	Olfml3
1.55206e-36	0.352584	0.681	0.659	2.1423e-32	D	Lcp1
1.07499e-07	0.251825	0.306	0.284	0.00148381	D	Pum2
5.26654e-22	0.327322	0.539	0.518	7.2694e-18	D	Top1
9.01569e-22	0.312293	0.579	0.558	1.24444e-17	D	Srsf11
4.29644e-22	0.26647	0.664	0.644	5.93038e-18	D	Rbm25
7.76595e-10	0.287988	0.369	0.349	1.07193e-05	D	Atp2c1
4.35094e-11	0.293558	0.401	0.382	6.0056e-07	D	Atf4
1.52752e-06	0.253509	0.284	0.265	0.0210843	D	Pacsin2
1.39246e-48	0.405466	0.706	0.687	1.92201e-44	D	Fam49b
3.14966e-14	0.288108	0.458	0.44	4.34747e-10	D	Ski
4.43998e-15	0.296055	0.448	0.431	6.12851e-11	D	Vav1
4.57441e-14	0.273521	0.476	0.461	6.31406e-10	D	Acin1
7.44583e-09	0.258298	0.373	0.358	0.000102775	D	Atxn7l3b
3.58862e-26	0.319914	0.623	0.609	4.95337e-22	D	Akap13
5.78809e-08	0.253219	0.343	0.329	0.00079893	D	Fes
2.10476e-10	0.258546	0.429	0.415	2.9052e-06	D	Apobec3
2.67346e-05	0.251553	0.289	0.275	0.369018	D	Akap9
1.47968e-33	0.347961	0.637	0.624	2.0424e-29	D	Plekho1
1.0972e-21	0.295799	0.583	0.57	1.51446e-17	D	Ptpn1
2.91682e-18	0.272468	0.583	0.57	4.02609e-14	D	Ypel3
0	0.680504	0.999	0.987	0	D	Csf1r
5.51173e-47	0.312738	0.851	0.839	7.60784e-43	D	Plxdc2
1.483e-16	0.264153	0.557	0.546	2.04699e-12	D	Srsf2
5.09421e-14	0.261499	0.493	0.483	7.03154e-10	D	Nisch
7.90067e-52	0.372202	0.826	0.817	1.09053e-47	D	Cd37
1.12704e-07	0.256046	0.35	0.341	0.00155565	D	Stard3
1.12305e-10	0.270388	0.473	0.465	1.55014e-06	D	Atrx
1.38255e-18	0.276532	0.582	0.574	1.90834e-14	D	Eif5
2.67618e-76	0.406974	0.865	0.859	3.69394e-72	D	Calm2
7.78077e-161	0.385584	1	0.994	1.07398e-156	D	Lgmn
2.66083e-24	0.327188	0.668	0.663	3.67274e-20	D	Arl4c
4.92325e-08	0.257019	0.38	0.376	0.000679557	D	Tgs1
1.20247e-23	0.306517	0.593	0.59	1.65977e-19	D	Rnf13
3.09832e-07	0.250251	0.359	0.356	0.00427661	D	Lpcat3
3.68069e-13	0.290054	0.466	0.464	5.08045e-09	D	Nckap1l
4.19103e-126	0.301477	1	0.999	5.78488e-122	D	Hexb
6.31458e-09	0.259144	0.396	0.395	8.71601e-05	D	Pkn1
4.30776e-13	0.254104	0.483	0.482	5.946e-09	D	Csnk1a1
3.19262e-18	0.252654	0.62	0.619	4.40677e-14	D	Hnrnpu
0	0.930688	1	1	0	D	Cst3
7.40745e-09	0.260149	0.414	0.414	0.000102245	D	Jak1
6.36709e-17	0.295629	0.538	0.539	8.78849e-13	D	Ubl3
5.41213e-08	0.254778	0.386	0.387	0.000747036	D	Snx6
2.1449e-09	0.262174	0.442	0.445	2.9606e-05	D	Hnrnpdl
2.36755e-06	0.255888	0.386	0.389	0.0326793	D	Fubp1
2.8806e-62	0.315147	0.928	0.932	3.97609e-58	D	Basp1
2.50041e-12	0.251874	0.516	0.522	3.45131e-08	D	Srrm1
5.00337e-14	0.272377	0.522	0.529	6.90615e-10	D	Tor1aip1
2.44137e-50	0.331907	0.892	0.9	3.36982e-46	D	Gm42418
9.60309e-40	0.290953	0.868	0.877	1.32551e-35	D	Man2b1
1.64801e-40	0.258456	0.945	0.954	2.27475e-36	D	Rgs10
2.57277e-38	0.332569	0.752	0.763	3.5512e-34	D	Tpm3
1.26349e-07	0.268794	0.421	0.432	0.00174399	D	Xbp1
4.2956e-36	0.291115	0.801	0.813	5.92922e-32	D	Rab14
2.23471e-15	0.258684	0.563	0.579	3.08457e-11	D	Srsf3
4.18309e-23	0.257608	0.74	0.757	5.77392e-19	D	Cyfip1
2.00637e-09	0.251178	0.482	0.501	2.7694e-05	D	Ncor1
5.76647e-14	0.265218	0.568	0.591	7.95946e-10	D	Pak2
3.73078e-14	0.256152	0.577	0.601	5.14959e-10	D	Nars
9.72355e-06	0.262268	0.454	0.482	0.134214	D	Cebpa
4.4882e-15	0.279346	0.591	0.622	6.19507e-11	D	Tnfaip8l2
1.13827e-23	0.265963	0.726	0.759	1.57116e-19	D	Sec62
4.21595e-24	0.26152	0.785	0.822	5.81927e-20	D	Hnrnpa2b1
3.39733e-25	0.2743	0.744	0.782	4.68934e-21	D	Camk1
0.00607326	0.353156	0.502	0.573	1	D	Hsp90aa1
0	1.54546	0.794	0.149	0	E	v
0	1.25622	0.771	0.216	0	E	Pdlim4
0	1.20805	0.787	0.343	0	E	Blvrb
0	1.12549	0.492	0.087	0	E	Pla2g7
1.06554e-231	0.933825	0.671	0.273	1.47077e-227	E	Cd300a
1.74517e-246	0.936417	0.479	0.119	2.40885e-242	E	Gclm
1.20521e-162	0.93364	0.57	0.236	1.66354e-158	E	Crybb1
2.66867e-172	0.767146	0.759	0.439	3.68357e-168	E	Tanc2
5.13269e-164	0.867106	0.7	0.386	7.08465e-160	E	C5ar1
9.03815e-128	0.618987	0.534	0.229	1.24754e-123	E	Adgrg1
1.03608e-128	0.690233	0.632	0.329	1.43011e-124	E	Mir99ahg
2.24706e-140	0.817654	0.489	0.189	3.10162e-136	E	Adrb2
7.38484e-150	0.866242	0.8	0.505	1.01933e-145	E	Txnip
1.274e-152	0.86805	0.747	0.456	1.7585e-148	E	Ccr5
9.10192e-119	0.65398	0.572	0.282	1.25634e-114	E	Il17ra
1.43772e-124	0.651083	0.588	0.3	1.98449e-120	E	Lyl1
3.30096e-152	0.70251	0.392	0.114	4.55632e-148	E	Slc40a1
1.85478e-161	0.69088	0.383	0.108	2.56016e-157	E	Rnf128
1.14906e-113	0.61392	0.62	0.345	1.58604e-109	E	Crlf3
8.21144e-149	0.653537	0.378	0.111	1.13342e-144	E	Txnrd1
7.40109e-144	0.724077	0.817	0.552	1.02157e-139	E	Ssh2
5.03905e-105	0.583175	0.565	0.302	6.9554e-101	E	Sall1
3.94484e-204	0.590391	0.319	0.056	5.44507e-200	E	B430306N03Rik
1.76177e-122	0.6814	0.648	0.39	2.43177e-118	E	Ninj1
3.33961e-101	0.757098	0.466	0.211	4.60967e-97	E	Cebpd
1.35685e-132	0.559485	0.357	0.102	1.87286e-128	E	Camk2n1
1.18156e-134	0.65602	0.755	0.501	1.63091e-130	E	Pla2g15
2.09931e-96	0.568384	0.549	0.297	2.89767e-92	E	Tnrc6a
8.92701e-178	0.977474	0.76	0.508	1.2322e-173	E	Lipa
1.33935e-176	0.763192	0.843	0.591	1.8487e-172	E	Slc11a1
7.75014e-99	1.39167	0.465	0.219	1.06975e-94	E	Tnf
8.87112e-122	0.628735	0.802	0.559	1.22448e-117	E	Irf2bp2
3.49675e-129	0.786424	0.822	0.582	4.82656e-125	E	Zfp36l2
6.05357e-172	0.753139	0.816	0.579	8.35574e-168	E	Taldo1
2.06051e-91	0.562638	0.7	0.463	2.84413e-87	E	E230029C05Rik
1.14939e-81	0.497092	0.622	0.385	1.5865e-77	E	Il6ra
9.236e-103	1.0332	0.673	0.439	1.27485e-98	E	Neat1
2.56064e-87	0.554285	0.631	0.404	3.53445e-83	E	Mafg
8.48513e-81	0.53257	0.632	0.406	1.1712e-76	E	Nrip1
1.72753e-92	0.905741	0.7	0.476	2.38451e-88	E	Ier3
1.02902e-86	0.525142	0.714	0.49	1.42035e-82	E	Pag1
9.05238e-86	0.569505	0.629	0.406	1.2495e-81	E	P2ry13
2.68487e-78	0.533983	0.441	0.219	3.70592e-74	E	Tuba1a
1.55939e-97	0.593597	0.728	0.506	2.15242e-93	E	Zfhx3
6.81415e-140	0.520782	0.285	0.065	9.40557e-136	E	Il18bp
1.03462e-86	0.517188	0.385	0.165	1.42808e-82	E	Slc8a1
0	1.22351	0.952	0.734	0	E	P2ry12
1.91078e-73	0.500414	0.546	0.328	2.63745e-69	E	Mgat4a
4.32217e-75	0.512126	0.536	0.321	5.96589e-71	E	Mtus1
5.72927e-76	0.491447	0.409	0.195	7.90811e-72	E	Tspan13
1.98244e-70	0.498739	0.546	0.333	2.73636e-66	E	Lacc1
9.1546e-96	0.544718	0.75	0.537	1.26361e-91	E	Ivns1abp
2.48112e-64	0.457894	0.569	0.358	3.4247e-60	E	Dock4
1.25598e-69	0.484822	0.542	0.332	1.73362e-65	E	Zbtb7a
8.33578e-86	0.534835	0.755	0.548	1.15059e-81	E	Frmd4a
1.21772e-75	0.57402	0.787	0.581	1.68082e-71	E	Klf6
1.36367e-103	0.640071	0.756	0.55	1.88227e-99	E	Mylip
8.18207e-91	0.971272	0.819	0.616	1.12937e-86	E	Nfkbia
3.17022e-64	0.5354	0.552	0.349	4.37586e-60	E	Nav3
4.14136e-96	0.573629	0.758	0.556	5.71632e-92	E	Ankrd11
1.58022e-91	0.753486	0.666	0.466	2.18118e-87	E	Sqstm1
5.09059e-86	0.532724	0.76	0.56	7.02655e-82	E	Srgap2
7.63712e-66	0.404821	0.829	0.631	1.05415e-61	E	Dleu2
2.53172e-89	0.551405	0.711	0.514	3.49453e-85	E	Bmp2k
2.58019e-96	0.532808	0.866	0.669	3.56144e-92	E	AC149090.1
1.9724e-81	0.570626	0.609	0.413	2.7225e-77	E	Pgd
3.78328e-61	0.472152	0.547	0.354	5.22206e-57	E	St3gal5
9.4738e-55	0.41444	0.505	0.312	1.30767e-50	E	Resf1
2.57436e-58	0.457731	0.422	0.229	3.55338e-54	E	4632427E13Rik
7.77967e-67	0.481492	0.598	0.405	1.07383e-62	E	Susd3
3.54593e-169	0.69545	0.923	0.731	4.89444e-165	E	Ifngr1
3.63969e-59	0.454371	0.433	0.241	5.02386e-55	E	Rapgef6
3.23621e-59	0.448584	0.43	0.239	4.46694e-55	E	Gcnt1
8.36063e-77	0.448445	0.76	0.57	1.15402e-72	E	Alox5ap
3.82965e-59	0.561314	0.562	0.373	5.28607e-55	E	Pik3r1
4.23376e-57	0.406434	0.688	0.499	5.84386e-53	E	Ccnl1
1.68601e-90	0.537898	0.789	0.601	2.32719e-86	E	Maf
1.77796e-61	0.47498	0.383	0.195	2.45412e-57	E	S1pr1
2.58769e-67	0.448021	0.672	0.485	3.5718e-63	E	Slc29a3
5.37741e-78	0.602385	0.291	0.105	7.42244e-74	E	B930036N10Rik
2.94098e-61	0.439033	0.369	0.183	4.05943e-57	E	Itgav
9.44302e-55	0.423326	0.406	0.222	1.30342e-50	E	Mgat1
1.48287e-53	0.459516	0.511	0.327	2.0468e-49	E	Dock10
7.85408e-88	0.529691	0.802	0.622	1.0841e-83	E	Gpr183
6.63846e-64	0.450725	0.687	0.508	9.16307e-60	E	Arhgap45
1.3869e-59	0.418534	0.336	0.158	1.91434e-55	E	Tmem168
4.37513e-52	0.390725	0.386	0.208	6.03899e-48	E	Snx29
1.189e-56	0.451236	0.593	0.415	1.64118e-52	E	Cflar
7.02939e-68	0.503849	0.603	0.426	9.70267e-64	E	Hnrnpm
2.99884e-75	0.529714	0.711	0.534	4.1393e-71	E	Tcf4
2.0602e-51	0.45023	0.474	0.298	2.8437e-47	E	Zfp292
2.42918e-57	0.440261	0.67	0.494	3.35299e-53	E	Runx1
3.63044e-58	0.493325	0.378	0.202	5.0111e-54	E	C1galt1c1
1.63692e-49	0.442801	0.553	0.378	2.25944e-45	E	Lst1
3.46628e-50	0.459033	0.45	0.275	4.78451e-46	E	Gtpbp2
7.61151e-52	0.392342	0.361	0.186	1.05062e-47	E	Klk8
7.51064e-46	0.384855	0.496	0.321	1.03669e-41	E	1700017B05Rik
1.90546e-73	0.507198	0.662	0.488	2.6301e-69	E	Cmtm6
4.51269e-57	0.487339	0.539	0.367	6.22886e-53	E	Ccdc50
3.85426e-49	0.424441	0.466	0.294	5.32003e-45	E	Map11
3.10408e-46	0.395312	0.407	0.235	4.28456e-42	E	Pid1
3.84781e-59	0.62668	0.628	0.457	5.31113e-55	E	Gpr84
1.89976e-47	0.376271	0.573	0.403	2.62224e-43	E	Wsb1
5.17199e-48	0.36827	0.384	0.214	7.1389e-44	E	Grap
3.77212e-46	0.436623	0.492	0.322	5.20666e-42	E	Ecscr
5.04233e-50	0.403274	0.38	0.211	6.95993e-46	E	Fam53b
4.59362e-61	0.397599	0.297	0.128	6.34058e-57	E	Cat
5.93091e-187	0.687535	0.902	0.734	8.18644e-183	E	Rtn4
4.76493e-56	0.495221	0.51	0.342	6.57703e-52	E	Abcd2
5.58517e-57	0.468488	0.594	0.426	7.70921e-53	E	Pde3b
2.13155e-51	0.426587	0.557	0.39	2.94217e-47	E	Tpst2
2.27536e-52	0.426649	0.33	0.163	3.14068e-48	E	Tbc1d23
2.0416e-70	0.539649	0.873	0.707	2.81801e-66	E	Jun
8.08984e-54	0.376244	0.316	0.15	1.11664e-49	E	Fbxl3
2.99644e-59	0.368157	0.284	0.119	4.13599e-55	E	Tbc1d9
8.67448e-46	0.435888	0.434	0.269	1.19734e-41	E	Ppp1r10
1.5761e-51	0.451127	0.521	0.357	2.17548e-47	E	Cd164
2.12078e-44	0.39846	0.455	0.293	2.92732e-40	E	Morc3
1.98981e-41	0.396427	0.411	0.249	2.74654e-37	E	Fchsd2
1.40128e-42	0.385058	0.47	0.308	1.93419e-38	E	Arhgap31
1.07891e-44	0.362562	0.351	0.189	1.48922e-40	E	Ccnt2
3.72865e-71	0.477198	0.731	0.569	5.14666e-67	E	Otulinl
3.6286e-45	0.390954	0.524	0.363	5.00855e-41	E	Ms4a6d
1.67254e-44	0.370257	0.65	0.489	2.30861e-40	E	Rhoh
3.42845e-65	0.454468	0.255	0.094	4.7323e-61	E	Dhx40
5.55023e-41	0.35391	0.587	0.426	7.66098e-37	E	Elmo1
2.23032e-86	0.483158	0.885	0.725	3.0785e-82	E	Zeb2
3.48157e-43	0.383991	0.36	0.201	4.80561e-39	E	Zkscan3
1.85553e-41	0.408579	0.398	0.24	2.56119e-37	E	March1
1.33208e-45	0.395698	0.572	0.414	1.83867e-41	E	Ophn1
1.65942e-43	0.380211	0.385	0.227	2.2905e-39	E	Lnpep
6.85959e-42	0.376772	0.421	0.263	9.46829e-38	E	Irak2
1.51027e-47	0.374265	0.305	0.148	2.08463e-43	E	Soga1
1.15778e-45	0.357415	0.312	0.155	1.59809e-41	E	BC005561
3.71438e-43	0.37075	0.359	0.202	5.12696e-39	E	Mfap3
1.08726e-41	0.400648	0.534	0.379	1.50074e-37	E	Stab1
2.17477e-37	0.437292	0.484	0.329	3.00183e-33	E	Tent5a
3.59449e-87	0.46739	0.856	0.701	4.96148e-83	E	Mef2a
1.40579e-81	0.476759	0.822	0.668	1.94042e-77	E	Rsrp1
6.15646e-48	0.393128	0.288	0.134	8.49777e-44	E	B430010I23Rik
4.58325e-44	0.366811	0.319	0.165	6.32626e-40	E	Cysltr1
7.64599e-38	0.500417	0.459	0.307	1.05538e-33	E	Tnfaip3
1.05004e-40	0.422324	0.409	0.257	1.44937e-36	E	Tubgcp5
3.40899e-40	0.379528	0.554	0.402	4.70543e-36	E	Kmt2e
2.44868e-37	0.604834	0.427	0.275	3.37992e-33	E	Cited2
1.31501e-46	0.423086	0.537	0.387	1.81511e-42	E	Dnajc7
2.50871e-38	0.382782	0.429	0.279	3.46277e-34	E	Slc15a4
4.11689e-102	0.527594	0.866	0.717	5.68255e-98	E	Mbnl1
2.79666e-36	0.351178	0.377	0.228	3.86023e-32	E	Sall3
2.08984e-40	0.361194	0.32	0.172	2.8846e-36	E	Gm15503
1.55331e-95	0.584152	0.916	0.769	2.14404e-91	E	Jund
4.32279e-46	0.335245	0.269	0.122	5.96674e-42	E	Tjp1
4.37484e-36	0.332817	0.347	0.2	6.03859e-32	E	Mob3c
1.01045e-38	0.365522	0.318	0.171	1.39472e-34	E	Col27a1
2.22139e-44	0.410915	0.285	0.139	3.06618e-40	E	Nuak2
5.05702e-38	0.420533	0.614	0.468	6.98021e-34	E	Dennd4a
5.00118e-42	0.450087	0.564	0.419	6.90313e-38	E	Dusp6
3.54915e-63	0.452087	0.723	0.578	4.8989e-59	E	Celf2
4.7004e-49	0.356249	0.255	0.11	6.48796e-45	E	Acvrl1
4.82902e-40	0.356082	0.326	0.181	6.6655e-36	E	AB124611
5.3182e-36	0.351105	0.424	0.279	7.34071e-32	E	Fez2
7.53749e-41	0.389241	0.332	0.188	1.0404e-36	E	Clcn3
3.93747e-37	0.356104	0.461	0.317	5.43489e-33	E	Nr3c1
1.28789e-34	0.338828	0.393	0.249	1.77768e-30	E	Clcn4
3.2093e-75	0.615087	0.835	0.692	4.4298e-71	E	Ier5
2.49141e-95	0.536375	0.881	0.739	3.4389e-91	E	Tgfbr1
1.77357e-43	0.375289	0.273	0.131	2.44806e-39	E	Ank2
2.80902e-36	0.367286	0.556	0.414	3.87729e-32	E	Fgd2
1.66648e-40	0.364474	0.292	0.15	2.30024e-36	E	Rgmb
6.32691e-39	0.358187	0.311	0.169	8.73303e-35	E	Slc38a9
2.3389e-60	0.458084	0.803	0.662	3.22838e-56	E	Tmem119
3.71155e-60	0.434668	0.762	0.621	5.12305e-56	E	Ptgs1
1.54425e-34	0.348188	0.453	0.312	2.13153e-30	E	Cbl
1.78692e-45	0.336606	0.253	0.112	2.46649e-41	E	Zbtb38
5.68729e-35	0.398794	0.408	0.268	7.85017e-31	E	Golgb1
9.50486e-33	0.329663	0.534	0.394	1.31196e-28	E	Mbnl2
6.87341e-35	0.342716	0.36	0.22	9.48737e-31	E	Gpr146
5.65857e-52	0.401542	0.698	0.559	7.81052e-48	E	Orai1
9.87827e-38	0.389169	0.509	0.37	1.3635e-33	E	Knop1
2.38769e-42	0.33732	0.264	0.125	3.29573e-38	E	Gclc
1.29011e-32	0.344637	0.421	0.282	1.78074e-28	E	Akap8l
1.3597e-37	0.328824	0.293	0.155	1.87679e-33	E	Ino80d
1.10909e-53	0.439427	0.648	0.511	1.53088e-49	E	Il10rb
5.98002e-41	0.322662	0.741	0.604	8.25422e-37	E	Tra2b
1.64677e-37	0.390824	0.599	0.462	2.27304e-33	E	Jmjd1c
4.0704e-67	0.478892	0.769	0.633	5.61838e-63	E	C3ar1
1.67712e-42	0.396213	0.641	0.505	2.31493e-38	E	Srrm1
1.51281e-43	0.374777	0.681	0.545	2.08813e-39	E	Srsf5
1.52182e-38	0.372965	0.273	0.137	2.10057e-34	E	Icosl
9.19092e-32	0.330869	0.404	0.269	1.26862e-27	E	B4galt1
2.95039e-75	0.500039	0.813	0.679	4.07242e-71	E	Hk2
5.59046e-32	0.457197	0.357	0.223	7.71651e-28	E	Tagap
3.16055e-37	0.373872	0.835	0.701	4.3625e-33	E	Cd14
1.21058e-46	0.400021	0.639	0.506	1.67096e-42	E	Atp6ap2
7.92993e-32	0.363108	0.415	0.282	1.09457e-27	E	Gal3st4
8.09183e-54	0.397083	0.793	0.661	1.11692e-49	E	Arhgap5
1.25565e-34	0.38713	0.5	0.368	1.73317e-30	E	Mat2a
7.87316e-29	0.321109	0.433	0.301	1.08673e-24	E	Ankrd44
3.92139e-29	0.294067	0.406	0.274	5.4127e-25	E	Tec
2.43759e-52	0.544659	0.811	0.68	3.3646e-48	E	Sgk1
1.4725e-49	0.415318	0.711	0.58	2.03249e-45	E	P2ry6
2.31577e-31	0.338265	0.404	0.273	3.19646e-27	E	Bach1
6.61406e-31	0.334721	0.464	0.333	9.12939e-27	E	Ppp3ca
8.33716e-33	0.32571	0.64	0.509	1.15078e-28	E	Git2
1.83249e-39	0.306925	0.252	0.121	2.52939e-35	E	Cds2
5.8617e-31	0.306	0.338	0.207	8.0909e-27	E	Tmod3
1.16407e-26	0.275896	0.547	0.417	1.60676e-22	E	Il10ra
7.98747e-32	0.34829	0.351	0.221	1.10251e-27	E	Igsf6
4.65455e-29	0.349688	0.397	0.267	6.42467e-25	E	Ptafr
2.53767e-29	0.317735	0.405	0.275	3.50274e-25	E	N4bp2l2
9.21249e-32	0.317492	0.341	0.212	1.2716e-27	E	Cd151
4.18253e-35	0.343757	0.523	0.394	5.77315e-31	E	Tspan14
2.21682e-28	0.316313	0.514	0.386	3.05988e-24	E	Frmd4b
3.72395e-29	0.317796	0.353	0.225	5.14016e-25	E	Tnrc6b
2.32516e-23	0.388848	0.419	0.292	3.20942e-19	E	Il1a
3.86079e-31	0.347043	0.322	0.195	5.32905e-27	E	Tlr13
1.8221e-30	0.34413	0.432	0.305	2.51505e-26	E	Slc7a7
1.70151e-39	0.342156	0.651	0.524	2.34859e-35	E	Prkcd
1.60954e-26	0.329273	0.335	0.208	2.22164e-22	E	Sox4
5.91647e-29	0.303444	0.371	0.244	8.1665e-25	E	Cklf
1.10168e-30	0.312079	0.294	0.167	1.52064e-26	E	Tmcc1
2.4978e-30	0.339574	0.515	0.389	3.44771e-26	E	Rock2
1.2058e-28	0.321264	0.352	0.227	1.66437e-24	E	N4bp1
7.5716e-32	0.396107	0.279	0.155	1.04511e-27	E	Hist1h1e
1.21724e-49	0.400414	0.681	0.557	1.68016e-45	E	Ptpn1
1.38315e-28	0.307749	0.425	0.301	1.90916e-24	E	Pten
8.97652e-26	0.303843	0.401	0.277	1.23903e-21	E	Numb
2.01847e-34	0.370733	0.513	0.39	2.7861e-30	E	Nudcd3
2.72661e-28	0.332898	0.493	0.37	3.76354e-24	E	Atf4
4.38454e-25	0.290148	0.384	0.261	6.05199e-21	E	Zfp710
3.56606e-35	0.360242	0.574	0.452	4.92223e-31	E	Cd47
1.91358e-38	0.393769	0.614	0.492	2.64131e-34	E	Cttnbp2nl
6.89205e-37	0.351989	0.673	0.551	9.51309e-33	E	Ptpre
1.34004e-27	0.319409	0.379	0.257	1.84965e-23	E	Il4ra
3.90718e-192	0.707882	0.952	0.831	5.39308e-188	E	Ctsc
1.6077e-52	0.421859	0.715	0.594	2.21911e-48	E	Abca1
1.19807e-26	0.289428	0.317	0.196	1.6537e-22	E	Abca9
1.66739e-28	0.324076	0.462	0.342	2.3015e-24	E	Thrap3
1.859e-27	0.373678	0.471	0.352	2.56597e-23	E	Gatm
8.99151e-26	0.306856	0.345	0.226	1.2411e-21	E	Hps3
9.92788e-30	0.341346	0.517	0.398	1.37035e-25	E	Brd2
3.30089e-29	0.329146	0.282	0.164	4.55621e-25	E	Abr
3.45677e-61	0.470587	0.844	0.726	4.77138e-57	E	Mcl1
7.14743e-24	0.45713	0.426	0.308	9.86559e-20	E	Tsc22d3
2.60582e-54	0.443274	0.735	0.617	3.59682e-50	E	Slco2b1
1.60112e-24	0.29082	0.319	0.201	2.21003e-20	E	Rapgef5
8.0615e-25	0.298713	0.357	0.239	1.11273e-20	E	Cln8
2.70374e-256	0.798258	0.969	0.852	3.73197e-252	E	Cyth4
5.08126e-26	0.304132	0.323	0.206	7.01367e-22	E	Snrnp48
1.78839e-25	0.292977	0.435	0.318	2.46851e-21	E	Mcfd2
2.7077e-28	0.293042	0.265	0.149	3.73744e-24	E	Atf7
1.16352e-71	0.489079	0.801	0.685	1.606e-67	E	Golm1
1.68773e-28	0.358805	0.567	0.452	2.32958e-24	E	Zfand5
1.32926e-26	0.335347	0.412	0.297	1.83478e-22	E	Tm9sf2
7.34557e-28	0.326505	0.475	0.36	1.01391e-23	E	Ubash3b
3.25212e-204	0.671887	0.96	0.845	4.4889e-200	E	Vsir
1.71948e-40	0.649955	0.704	0.589	2.3734e-36	E	Fos
2.41808e-35	0.622325	0.634	0.519	3.33767e-31	E	Dusp1
[truncated: 461 more rows]
