# Supplementary material for: PRMT1 is required for the generation of MHC-associated microglia and remyelination in the central nervous system
Source: Life Sci Alliance. 2022 Jun 15;5(10):e202201467. doi: 10.26508/lsa.202201467 (PMC9201232; doi:10.26508/lsa.202201467)
Supplement: Supplementary file 3 [file LSA-2022-01467_TableS3.xlsx]

## Sheet: WT_Basal_KO_Basal
Gene	ID	chr	start	end	strand	Length	Copies	Annotation/Divergence	WT_Basal_rep1/	WT_Basal_rep2/	WT_Basal_rep3/	KO_Basal_rep1/	KO_Basal_rep2/	WT_Basal vs. KO_Basal Log2 Fold Change	WT_Basal vs. KO_Basal p-value	WT_Basal vs. KO_Basal adj. p-value	Unigene	RefSeq	Ensembl	alias	orf	chromosome	description	type	Upregulated	Downregulated	BaseMean	HasReads
Tnfaip2	NM_009396	chr12	111442661	111455018	+	3547	1	Tnfaip2||Tnfaip2|NM_009396|	216.41	176.56	204.74	579.44	361.39	1.22821	6.1802e-12	1.55982e-07	Mm.255332	NM_009396	ENSMUSG00000021281	B94|Exoc3l3|M-sec|Tnfip2|tnfb94	-	12 F1|12 60.99 cM	tumor necrosis factor, alpha-induced protein 2	protein-coding	yes	no	307.708	yes
Ldlr	NM_010700	chr9	21723576	21749918	+	4498	1	Ldlr||Ldlr|NM_010700|	36.27	60.84	63.35	148.49	121.08	1.31124	2.54737e-10	2.1431e-06	Mm.3213	NM_010700	ENSMUSG00000032193	Hlb301	-	9 A3|9 7.87 cM	low density lipoprotein receptor	protein-coding	yes	no	86.006	yes
Tspoap1	NM_172449	chr11	87760541	87785928	+	7553	1	Tspoap1||Tspoap1|NM_172449|	16.93	16.7	19.28	71.68	53.09	1.80188	5.47304e-10	3.45335e-06	Mm.342019	NM_172449	ENSMUSG00000034156	Bzrap1|D230016K05|PRAX-1|mKIAA0612	-	11|11 C	TSPO associated protein 1	protein-coding	yes	no	35.536	yes
Amy1	NM_001110505	chr3	113555952	113577750	-	1642	1	Amy1||Amy1|NM_001110505|	1.21	5.96	4.59	72.54	19.56	3.49532	4.2953e-09	2.16818e-05	Mm.439727	NM_007446	ENSMUSG00000074264	Amy-1|Amy1a|C030014B17Rik	-	3 F3|3 49.35 cM	amylase 1, salivary	protein-coding	yes	no	20.772	yes
Trim16	NM_053169	chr11	62820253	62842948	+	3885	1	Trim16||Trim16|NM_053169|	12.09	13.12	17.44	107.52	32.6	2.2756	2.78131e-07	0.000779971	Mm.117087	NM_053169	ENSMUSG00000047821	9130006M08Rik|AI482483|EBBP	-	11|11 B2	tripartite motif-containing 16	protein-coding	yes	no	36.554	yes
Igf1	NM_001111275	chr10	87859052	87937047	+	7066	1	Igf1||Igf1|NM_001111275|	27.81	39.37	22.04	82.78	69.86	1.36799	3.60497e-07	0.000909859	Mm.268521	NM_010512	ENSMUSG00000020053	C730016P09Rik|Igf-1|Igf-I	-	10 C1|10 43.7 cM	insulin-like growth factor 1	protein-coding	yes	no	48.372	yes
Pla2g7	NM_013737	chr17	43568451	43612201	+	1892	1	Pla2g7||Pla2g7|NM_013737|	13.3	34.6	38.56	102.4	66.13	1.52041	1.4462e-06	0.00228129	Mm.9277	NM_013737	ENSMUSG00000023913	PAF-AH|R75400	-	17|17 B3	phospholipase A2, group VII (platelet-activating factor acetylhydrolase, plasma)	protein-coding	yes	no	50.998	yes
Tnfsf9	NM_009404	chr17	57105385	57107757	+	1225	1	Tnfsf9||Tnfsf9|NM_009404|	32.64	50.1	62.43	119.47	94.07	1.11473	1.61846e-06	0.00240285	Mm.41171	NM_009404	ENSMUSG00000035678	4-1BB-L|4-1BBL|AI848817|Cd137l|Ly63l	-	17|17 D	tumor necrosis factor (ligand) superfamily, member 9	protein-coding	yes	no	71.742	yes
Adam4	NM_009620	chr12	81419443	81422039	-	2596	1	Adam4||Adam4|NM_009620|	8.46	15.51	16.53	81.92	29.81	2.02322	2.73018e-06	0.00362669	Mm.408462	NM_009620	ENSMUSG00000072972	AV274654|tMDCV	-	12|12 D1	a disintegrin and metallopeptidase domain 4	protein-coding	yes	no	30.446	yes
AB124611	NM_001198794	chr9	21526177	21545331	+	1294	1	AB124611||AB124611|NM_001198794|	16.93	16.7	24.79	66.56	40.98	1.43527	6.24545e-06	0.00637339	Mm.325205	NM_206536	ENSMUSG00000057191	Gm1706	-	9|9 A3	cDNA sequence AB124611	protein-coding	yes	no	33.192	yes
Cdc14b	NM_172587	chr13	64192545	64274988	-	5832	1	Cdc14b||Cdc14b|NM_172587|	50.78	68	56.92	174.94	84.76	1.14165	3.15456e-05	0.0256832	Mm.25335	NM_172587	ENSMUSG00000033102	2810432N10Rik|A530086E13Rik|AA472821|CDC14B3|Cdc14B1	-	13|13 B3	CDC14 cell division cycle 14B	protein-coding	yes	no	87.08	yes
Ntsr2	NM_008747	chr12	16653470	16660236	+	1540	1	Ntsr2||Ntsr2|NM_008747|	12.09	26.25	30.3	51.2	58.68	1.22248	3.59326e-05	0.0266736	Mm.281715	NM_008747	ENSMUSG00000020591	NT-R-2|NT2R|NTR2|NTRL	-	12 A1.1|12 7.98 cM	neurotensin receptor 2	protein-coding	yes	no	35.704	yes
Kcnj9	NM_008429	chr1	172320508	172329322	-	3847	1	Kcnj9||Kcnj9|NM_008429|	53.2	54.88	59.68	153.61	80.1	1.0532	5.4021e-05	0.0349599	Mm.261168	NM_008429	ENSMUSG00000038026	1700085N21Rik|Girk3|Kir3.3|mbGIRK3	-	1 H3|1 79.66 cM	potassium inwardly-rectifying channel, subfamily J, member 9	protein-coding	yes	no	80.294	yes
Cep83os	NR_015524	chr10	94673493	94688613	-	4130	1	Cep83os||Cep83os|NR_015524|	20.55	35.79	43.15	3.41	8.38	-2.51062	1.70063e-07	0.000536527	Mm.116284	NR_015524		4932415G12Rik|Ccdc41os1	-	10|10 C2	centrosomal protein 83, opposite strand	ncRNA	no	yes	22.256	yes
Mymk	NM_025376	chr2	27061636	27072161	-	1355	1	Mymk||Mymk|NM_025376|	78.58	72.77	74.37	29.01	45.64	-1.0284	2.21763e-05	0.0193002	Mm.330087	NM_025376	ENSMUSG00000009214	1110002H13Rik|AI131587|Tmem8c|myomaker	-	2|2 A3	myomaker, myoblast fusion factor	protein-coding	no	yes	60.074	yes
Slc1a2	NM_001077514	chr2	102658689	102790784	+	11544	1	Slc1a2||Slc1a2|NM_001077514|	160.8	211.15	180.87	323.43	349.28	0.856978	5.6272e-11	7.10124e-07	Mm.267547	NM_011393	ENSMUSG00000005089	1700091C19Rik|2900019G14Rik|AI159670|Eaat2|GLT-1|GLT1|MGLT1	-	2 E2|2 54.13 cM	solute carrier family 1 (glial high affinity glutamate transporter), member 2	protein-coding	no	no	245.106	yes
Slc5a3	NM_017391	chr16	92058322	92087473	+	10910	1	Slc5a3||Slc5a3|NM_017391|	188.6	193.26	249.73	339.64	373.5	0.739591	9.03305e-09	3.79975e-05	Mm.217354	NM_017391	ENSMUSG00000089774	AA623876|BF642829|Smit1	-	16|16 C4	solute carrier family 5 (inositol transporters), member 3	protein-coding	no	no	268.946	yes
Atp1a2	NM_178405	chr1	172271709	172298064	-	6182	1	Atp1a2||Atp1a2|NM_178405|	145.08	206.38	230.45	336.23	323.2	0.748099	4.02214e-07	0.000922861	Mm.207432	NM_178405	ENSMUSG00000007097	AW060654|Atpa-3|mKIAA0778	-	1 H3|1 79.6 cM	ATPase, Na+/K+ transporting, alpha 2 polypeptide	protein-coding	no	no	248.268	yes
Mast4	NM_175171	chr13	102732489	103334492	-	10613	1	Mast4||Mast4|NM_175171|	108.81	101.4	110.18	180.92	172.31	0.713642	6.45803e-07	0.00135829	Mm.202606	NM_175171	ENSMUSG00000034751	4930420O11Rik|AI642422|mKIAA0303	-	13|13 D1	microtubule associated serine/threonine kinase family member 4	protein-coding	no	no	134.724	yes
Vcam1	NM_011693	chr3	116110020	116129688	-	3381	1	Vcam1||Vcam1|NM_011693|	68.91	52.49	67.94	111.79	128.54	0.909716	8.34883e-07	0.00162089	Mm.76649	NM_011693	ENSMUSG00000027962	CD106|Vcam-1	-	3 G1|3 50.17 cM	vascular cell adhesion molecule 1	protein-coding	no	no	85.934	yes
Glb1	NM_009752	chr9	114401078	114474379	+	2365	1	Glb1||Glb1|NM_009752|	239.38	248.14	252.49	120.33	174.17	-0.761563	9.45153e-07	0.00170391	Mm.290516	NM_009752	ENSMUSG00000045594	AW125515|Bge|Bgl|Bgl-e|Bgl-s|Bgl-t|Bgs|Bgt|C130097A14Rik	-	9 F3|9 64.4 cM	galactosidase, beta 1	protein-coding	no	no	206.902	yes
Trpv4	NM_022017	chr5	114622154	114658421	-	3195	1	Trpv4||Trpv4|NM_022017|	73.75	71.58	81.71	179.21	119.22	0.967615	1.19413e-06	0.00200924	Mm.266450	NM_022017	ENSMUSG00000014158	0610033B08Rik|OTRPC4|Trp12|VR-OAC|VRL-2|VROAC	-	5|5 F	transient receptor potential cation channel, subfamily V, member 4	protein-coding	no	no	105.094	yes
Dhx40	NM_026191	chr11	86768849	86807660	-	3689	1	Dhx40||Dhx40|NM_026191|	128.15	164.63	262.59	401.09	326	0.959215	2.43658e-06	0.0034165	Mm.260627	NM_026191	ENSMUSG00000018425	2410016C14Rik|ARG147|DDX40|PAD	-	11|11 C	DEAH (Asp-Glu-Ala-His) box polypeptide 40	protein-coding	no	no	256.492	yes
Capns2	NM_027112	chr8	92901395	92902409	+	1014	1	Capns2||Capns2|NM_027112|	95.51	97.82	89.06	236.38	137.85	0.984582	4.36592e-06	0.00550958	Mm.440514	NM_027112	ENSMUSG00000078144	2310005G05Rik|30K-2	-	8|8 C5	calpain, small subunit 2	protein-coding	no	no	131.324	yes
Sparcl1	NM_001359014	chr5	104079109	104114088	-	3271	1	Sparcl1||Sparcl1|NM_001359014|	55.61	60.84	81.71	120.33	120.15	0.835192	4.78925e-06	0.00575599	Mm.29027	NM_010097	ENSMUSG00000029309	Ecm2|Sc1|hevin|mast9	-	5 E5|5 50.55 cM	SPARC-like 1	protein-coding	no	no	87.728	yes
Pde4b	NM_001177980	chr4	102570060	102607262	+	4187	1	Pde4b||Pde4b|NM_001177980|	310.71	279.15	348.89	465.94	438.7	0.516241	6.31304e-06	0.00637339	Mm.20181	NM_019840	ENSMUSG00000028525	Dpde4|R74983|dunce	-	4 C6|4 46.99 cM	phosphodiesterase 4B, cAMP specific	protein-coding	no	no	368.678	yes
Blvrb	NM_144923	chr7	27447978	27465981	+	856	1	Blvrb||Blvrb|NM_144923|	56.82	46.53	66.11	119.47	96.87	0.916718	6.16832e-06	0.00637339	Mm.24021	NM_144923	ENSMUSG00000040466	-	-	7|7 A3	biliverdin reductase B (flavin reductase (NADPH))	protein-coding	no	no	77.16	yes
Rnf169	NM_175388	chr7	99920254	99980458	-	7146	1	Rnf169||Rnf169|NM_175388|	644.39	639.43	791.43	1286.03	903.47	0.651534	5.81602e-06	0.00637339	Mm.323087	NM_175388	ENSMUSG00000058761	2900057K09Rik	-	7|7 E2	ring finger protein 169	protein-coding	no	no	852.95	yes
Slc11a2	NM_001146161	chr15	100392658	100423055	-	4342	1	Slc11a2||Slc11a2|NM_001146161|	189.81	164.63	176.28	307.21	244.03	0.630664	1.16632e-05	0.0113219	Mm.234608	NM_008732	ENSMUSG00000023030	DCT1|DMT1|Nramp2|mk|van	-	15 F1|15 56.29 cM	solute carrier family 11 (proton-coupled divalent metal ion transporters), member 2	protein-coding	no	no	216.392	yes
Acvrl1	NM_009612	chr15	101128522	101145336	+	3619	1	Acvrl1||Acvrl1|NM_009612|	181.35	182.52	221.27	311.48	271.04	0.562337	1.58618e-05	0.0142977	Mm.279542	NM_009612	ENSMUSG00000000530	AI115505|AI427544|Acvrlk1|Alk1	-	15|15 F1	activin A receptor, type II-like 1	protein-coding	no	no	233.532	yes
Sesn2	NM_144907	chr4	132492807	132510456	-	2636	1	Sesn2||Sesn2|NM_144907|	119.69	103.79	134.97	176.65	191.87	0.604097	3.28717e-05	0.0259265	Mm.23608	NM_144907	ENSMUSG00000028893	HI95|SEST2|Ses2	-	4|4 D2.3	sestrin 2	protein-coding	no	no	145.394	yes
Fzd5	NM_022721	chr1	64730558	64737750	-	6911	1	Fzd5||Fzd5|NM_022721|	143.87	93.05	109.26	188.6	192.8	0.714942	3.48807e-05	0.0266736	Mm.150813	NM_022721	ENSMUSG00000045005	5330434N09Rik|AI427138|Fz-5|Fz5|mFz5	-	1 C2|1 32.74 cM	frizzled class receptor 5	protein-coding	no	no	145.516	yes
Osgin1	NR_157155	chr8	119437147	119446256	+	1963	1	Osgin1||Osgin1|NR_157155|	108.81	102.6	85.39	202.25	140.64	0.790501	4.83177e-05	0.0326551	Mm.272357	NM_027950	ENSMUSG00000074063	1700012B18Rik|Okl38	-	8|8 E1	oxidative stress induced growth inhibitor 1	protein-coding	no	no	127.938	yes
Zfp719	NM_001357769	chr7	43579586	43593710	+	5029	1	Zfp719||Zfp719|NM_001357769|	201.9	205.19	175.36	359.27	254.28	0.652932	6.35811e-05	0.0401181	Mm.234422	NM_172482	ENSMUSG00000030469	8030458J18|9430094P17Rik|C630016O21Rik|mszf6	-	7|7 B3	zinc finger protein 719	protein-coding	no	no	239.2	yes
Arl5c	NM_207231	chr11	97989580	97996173	-	1550	1	Arl5c||Arl5c|NM_207231|	165.63	188.49	165.26	261.13	238.44	0.521776	8.30398e-05	0.050468	Mm.277896	NM_207231	ENSMUSG00000038352	Arl12|BC065791	-	11|11 D	ADP-ribosylation factor-like 5C	protein-coding	no	no	203.79	yes
Txnrd1	NM_001042523	chr10	82833951	82897724	+	3605	1	Txnrd1||Txnrd1|NM_001042523|	226.08	274.38	365.42	477.89	407.03	0.60201	8.39833e-05	0.050468	Mm.210155	NM_015762	ENSMUSG00000020250	TR|TR1|TrxR1	-	10|10 C1	thioredoxin reductase 1	protein-coding	no	no	350.16	yes
Gdf15	NM_001330687	chr8	70629393	70632456	-	1376	1	Gdf15||Gdf15|NM_001330687|	197.07	113.33	128.54	225.29	289.67	0.801546	9.53717e-05	0.0559787	Mm.31325	NM_011819	ENSMUSG00000038508	MIC-1|NAG-1|SBF	-	8|8 B3.3	growth differentiation factor 15	protein-coding	no	no	190.78	yes
Tlr3	NM_126166	chr8	45395665	45410619	-	4394	1	Tlr3||Tlr3|NM_126166|	713.31	708.62	667.48	516.29	541.15	-0.409885	0.000113795	0.0652745	Mm.33874	NM_126166	ENSMUSG00000031639	AI957183	-	8|8 B1.1	toll-like receptor 3	protein-coding	no	no	629.37	yes
Nin	NM_001081453	chr12	70011435	70102854	-	9618	1	Nin||Nin|NM_001081453|	244.22	196.84	191.89	428.39	268.25	0.713476	0.000149413	0.0754206	Mm.244047	NM_008697	ENSMUSG00000021068	3110068G20Rik|AI385615|AU024711|mKIAA1565	-	12|12 C2	ninein	protein-coding	no	no	265.918	yes
Ehd1	NM_010119	chr19	6276896	6300096	+	3173	1	Ehd1||Ehd1|NM_010119|	39.9	40.56	47.74	67.42	93.14	0.884216	0.0001444	0.0754206	Mm.30169	NM_010119	ENSMUSG00000024772	AA409636|Past1|RME-1	-	19 A|19 4.4 cM	EH-domain containing 1	protein-coding	no	no	57.752	yes
Egr3	NM_001289925	chr14	70077317	70082613	+	4048	1	Egr3||Egr3|NM_001289925|	216.41	145.54	164.35	104.96	110.84	-0.712326	0.000141816	0.0754206	Mm.103737	NM_018781	ENSMUSG00000033730	Pilot	-	14|14 D2	early growth response 3	protein-coding	no	no	148.42	yes
D730005E14Rik	NR_030675	chr15	79889532	79893138	-	3606	1	D730005E14Rik||D730005E14Rik|NR_030675|	31.43	29.82	56.01	93.02	68.92	1.01752	0.000146767	0.0754206	Mm.394656	NR_030675		-	-	15|15 E1	RIKEN cDNA D730005E14 gene	ncRNA	no	no	55.84	yes
Tubgcp6	NM_001163319	chr15	89099098	89123150	-	6908	1	Tubgcp6||Tubgcp6|NM_001163319|	228.5	219.51	217.6	382.31	277.56	0.5637	0.000147417	0.0754206	Mm.380934	NM_001163319	ENSMUSG00000051786	AI843275|D430023H11|GCP-6|mKIAA1669	-	15|15 E3	tubulin, gamma complex associated protein 6	protein-coding	no	no	265.096	yes
Dact1	NM_001190466	chr12	71309884	71320107	+	3754	1	Dact1||Dact1|NM_001190466|	25.39	20.28	20.2	52.06	41.91	1.09525	0.00015462	0.0765189	Mm.46662	NM_021532	ENSMUSG00000044548	4921528D17Rik|AI115603|DAPPER|DAPPER1|FRODO|Frd1|Frodo1|MDpr1|MTNG3|THYEX3	-	12|12 C3	dishevelled-binding antagonist of beta-catenin 1	protein-coding	no	no	31.968	yes
Apba1	NM_177034	chr19	23758876	23949597	+	6607	1	Apba1||Apba1|NM_177034|	467.88	486.73	488.45	314.89	396.78	-0.44966	0.000173429	0.0841763	Mm.22879	NM_177034	ENSMUSG00000024897	6430513E09Rik|Lin-10|Mint|Mint1|Urop11|X11|X11alpha	-	19|19 B	amyloid beta (A4) precursor protein binding, family A, member 1	protein-coding	no	no	430.946	yes
Efnb3	NM_007911	chr11	69554092	69560237	-	3206	1	Efnb3||Efnb3|NM_007911|	13.3	32.21	37.64	75.95	53.09	1.18948	0.000177538	0.0845449	Mm.249637	NM_007911	ENSMUSG00000003934	EFL-6|ELF-3|Elk-L3|Epl8|LERK-8|NLERK-2	-	11 B3|11 42.8 cM	ephrin B3	protein-coding	no	no	42.438	yes
Cpt1b	NM_009948	chr15	89416405	89425862	-	2857	1	Cpt1b||Cpt1b|NM_009948|	37.48	52.49	65.19	128.01	77.31	0.970198	0.000181758	0.0849515	Mm.227738	NM_009948	ENSMUSG00000078937	Cpt1|Cpt1-m|Cpti|Cpti-m|M-cpti	-	15 E3|15 44.89 cM	carnitine palmitoyltransferase 1b, muscle	protein-coding	no	no	72.096	yes
H2-Oa	NM_008206	chr17	34092379	34095234	+	1040	1	H2-Oa||H2-Oa|NM_008206|	116.06	127.65	124.87	52.06	91.28	-0.79718	0.000190592	0.0858993	Mm.116	NM_008206	ENSMUSG00000024334	H-2Oa	-	17 B1|17 17.98 cM	histocompatibility 2, O region alpha locus	protein-coding	no	no	102.384	yes
Bcan	NM_007529	chr3	87987531	88000356	-	3240	1	Bcan||Bcan|NM_007529|	13.3	50.1	48.66	71.68	117.36	1.31587	0.000187924	0.0858993	Mm.4598	NM_007529	ENSMUSG00000004892	Cspg7	-	3 F1|3 38.78 cM	brevican	protein-coding	no	no	60.22	yes
Fignl2	NM_001214911	chr15	101050192	101054399	-	4207	1	Fignl2||Fignl2|NM_001214911|	125.74	161.05	175.36	246.62	209.57	0.550415	0.000205164	0.0891228	Mm.385011	NM_001214911	ENSMUSG00000095440	EG668225	-	15|15 F1	fidgetin-like 2	protein-coding	no	no	183.668	yes
6430706D22Rik	NR_040291	chr1	88263113	88269408	-	3629	1	6430706D22Rik||6430706D22Rik|NR_040291|	822.12	235.01	538.95	191.16	243.1	-1.31195	0.000208338	0.0891228	Mm.384762	NR_040291		-	-	-	RIKEN cDNA 6430706D22 gene	ncRNA	no	no	406.068	yes
Thtpa	NM_153083	chr14	55094784	55098995	+	2836	1	Thtpa||Thtpa|NM_153083|	120.9	132.42	128.54	70.83	94.07	-0.642432	0.000215945	0.0908374	Mm.319204	NM_153083	ENSMUSG00000045691	AW122966	-	14|14 C3	thiamine triphosphatase	protein-coding	no	no	109.352	yes
F9	NM_007979	chrX	59999464	60030760	+	2720	1	F9||F9|NM_007979|	83.42	75.16	87.22	24.75	55.88	-1.04677	0.000225228	0.0931891	Mm.391283	NM_007979	ENSMUSG00000031138	AW111646|Cf-9|Cf9	-	X A6|X 33.5 cM	coagulation factor IX	protein-coding	no	no	65.286	yes
Creb5	NM_001327821	chr6	53287303	53700363	+	7850	1	Creb5||Creb5|NM_001327821|	66.49	113.33	65.19	188.6	121.08	0.919065	0.000239258	0.0973972	Mm.227444	NM_172728	ENSMUSG00000053007	9430076C15Rik|CRE-BPa|Crebpa|D430026C09Rik	-	6 B3|6 25.9 cM	cAMP responsive element binding protein 5	protein-coding	no	no	110.938	yes
Rusc2	NM_001369198	chr4	43382069	43427086	+	5269	1	Rusc2||Rusc2|NM_001369198|	249.05	231.44	279.11	412.18	313.89	0.507354	0.000253598	0.0984702	Mm.235730	NM_199057	ENSMUSG00000035969	AI840675|mKIAA0375	-	4|4 A5	RUN and SH3 domain containing 2	protein-coding	no	no	297.134	yes
Rhbdf2	NM_001167680	chr11	116598166	116624252	-	3607	1	Rhbdf2||Rhbdf2|NM_001167680|	245.43	217.12	255.24	324.28	326	0.427793	0.000250987	0.0984702	Mm.89695	NM_172572	ENSMUSG00000020806	4732465I17Rik|Rhbdl6|cub	-	11|11 E2	rhomboid 5 homolog 2	protein-coding	no	no	273.614	yes
Cd274	NM_021893	chr19	29367438	29388094	+	3625	1	Cd274||Cd274|NM_021893|	236.96	190.87	198.32	322.57	277.56	0.515211	0.000245939	0.0984702	Mm.245363	NM_021893	ENSMUSG00000016496	A530045L16Rik|B7h1|Pdcd1l1|Pdcd1lg1|Pdl1	-	19|19 C1	CD274 antigen	protein-coding	no	no	245.256	yes
Dapk1	NM_029653	chr13	60601947	60763191	+	5840	1	Dapk1||Dapk1|NM_029653|	158.38	145.54	178.12	281.61	203.05	0.580225	0.000283664	0.106857	Mm.24103	NM_029653	ENSMUSG00000021559	D13Ucla1|DAP-Kinase	-	13 B2|13 32.53 cM	death associated protein kinase 1	protein-coding	no	no	193.34	yes
Ripor2	NM_029679	chr13	24638648	24733806	+	5553	1	Ripor2||Ripor2|NM_029679|	29.02	29.82	48.66	81.07	60.54	0.950805	0.000298611	0.110833	Mm.217319	NM_029679	ENSMUSG00000036006	Fam65b	-	13|13 A3.1	RHO family interacting cell polarization regulator 2	protein-coding	no	no	49.822	yes
Pcdhgb2	NM_033575	chr18	37689859	37841872	+	4622	1	Pcdhgb2||Pcdhgb2|NM_033575|	460.63	458.1	495.79	280.76	395.85	-0.494983	0.000304367	0.111332	Mm.247203	NM_033575	ENSMUSG00000102748	-	-	18|18 B3	protocadherin gamma subfamily B, 2	protein-coding	no	no	418.226	yes
Nup210l	NM_029937	chr3	90104138	90212151	+	5730	1	Nup210l||Nup210l|NM_029937|	18.13	22.67	23.87	53.76	38.19	1.07493	0.000310059	0.111794	Mm.159949	NM_029937	ENSMUSG00000027939	4930548O11Rik|R26-EGFP|Tg(Gt(ROSA)26Sor-EGFP)130910Eps	-	3|3 F1	nucleoporin 210-like	protein-coding	no	no	31.324	yes
Gm5086	NR_046157	chr13	97560000	97583994	+	1292	1	Gm5086||Gm5086|NR_046157|	238.17	289.89	249.73	126.3	205.84	-0.658803	0.000329146	0.117004	Mm.138047	NR_046157	ENSMUSG00000110235	B230311A21|EG328314	-	13|13 D1	predicted gene 5086	ncRNA	no	no	221.986	yes
Clmn	NR_104436	chr12	104763114	104865076	-	11978	1	Clmn||Clmn|NR_104436|	8.46	27.44	20.2	39.26	49.37	1.21987	0.000374339	0.127675	Mm.244078	NM_053155	ENSMUSG00000021097	9330188N17Rik|AI428889|AI788815|mKIAA1188	-	12|12 E	calmin	protein-coding	no	no	28.946	yes
Chmp5	NM_029814	chr4	40948553	40965302	+	1357	1	Chmp5||Chmp5|NM_029814|	102.76	121.68	128.54	74.24	81.03	-0.617327	0.000371965	0.127675	Mm.212763	NM_029814	ENSMUSG00000028419	2210412K09Rik|AW545668	-	4|4 A5	charged multivesicular body protein 5	protein-coding	no	no	101.65	yes
Plekhh2	NM_001357986	chr17	84511895	84622138	+	6820	1	Plekhh2||Plekhh2|NM_001357986|	88.26	70.38	80.8	134.83	113.63	0.629307	0.000387258	0.128605	Mm.215159	NM_177606	ENSMUSG00000040852	AI256725|E030001K05|mKIAA2028	-	17|17 E4	pleckstrin homology domain containing, family H (with MyTH4 domain) member 2	protein-coding	no	no	97.58	yes
Ccdc122	NM_175369	chr14	77036772	77112263	+	1769	1	Ccdc122||Ccdc122|NM_175369|	31.43	40.56	39.48	16.21	18.63	-1.10561	0.000394187	0.129206	Mm.102168	NM_175369	ENSMUSG00000034795	4933415L06Rik	-	14|14 D3	coiled-coil domain containing 122	protein-coding	no	no	29.262	yes
Mical1	NM_138315	chr10	41476314	41487030	+	3516	1	Mical1||Mical1|NM_138315|	186.19	181.33	190.97	251.75	253.34	0.427584	0.000437723	0.13965	Mm.290431	NM_138315	ENSMUSG00000019823	MICAL|MICAL-1|Nical	-	10|10 B2	microtubule associated monooxygenase, calponin and LIM domain containing 1	protein-coding	no	no	212.716	yes
St8sia1	NM_011374	chr6	142821541	142964452	-	8986	1	St8sia1||St8sia1|NM_011374|	12.09	41.75	22.95	96.43	43.78	1.44721	0.000442649	0.13965	Mm.260838	NM_011374	ENSMUSG00000030283	9330109E03Rik|GD3S|Sia-T|Siat8|Siat8a	-	6 G2-G3|6 74.78 cM	ST8 alpha-N-acetyl-neuraminide alpha-2,8-sialyltransferase 1	protein-coding	no	no	43.4	yes
Pcdhga3	NM_033586	chr18	37674335	37841872	+	4684	1	Pcdhga3||Pcdhga3|NM_033586|	330.06	367.43	379.19	202.25	298.98	-0.534549	0.000439211	0.13965	Mm.247203	NM_033586	ENSMUSG00000104346	-	-	18|18 B3	protocadherin gamma subfamily A, 3	protein-coding	no	no	315.582	yes
Gadl1	NM_028638	chr9	115909455	116076176	+	3623	1	Gadl1||Gadl1|NM_028638|	32.64	20.28	31.22	11.09	11.18	-1.34106	0.000459283	0.143109	Mm.485018	NM_028638	ENSMUSG00000056880	1110027M19Rik|ADC|CSADC	-	9|9 F3	glutamate decarboxylase-like 1	protein-coding	no	no	21.282	yes
Hjurp	NM_198652	chr1	88258856	88277579	-	8424	1	Hjurp||Hjurp|NM_198652|	947.85	330.45	654.63	284.17	345.56	-1.05124	0.000502221	0.14373	Mm.384762	NM_198652	ENSMUSG00000044783	6430706D22Rik|A730008H23Rik|C330011F01Rik|Gm975|Mfleg1	-	1|1 D	Holliday junction recognition protein	protein-coding	no	no	512.532	yes
Clic4	NM_013885	chr4	135213970	135272760	-	4053	1	Clic4||Clic4|NM_013885|	136.62	182.52	179.95	221.88	251.48	0.49184	0.000486153	0.14373	Mm.257765	NM_013885	ENSMUSG00000037242	D0Jmb3|TU-74|mc3s5|mtCLIC	-	4|4 D3	chloride intracellular channel 4 (mitochondrial)	protein-coding	no	no	194.49	yes
Map3k12	NM_001163643	chr15	102497647	102517004	-	5497	1	Map3k12||Map3k12|NM_001163643|	70.12	60.84	58.76	139.1	85.69	0.82543	0.000472539	0.14373	Mm.172897	NM_009582	ENSMUSG00000023050	DLK|MUK|Zpk	-	15|15 F3	mitogen-activated protein kinase kinase kinase 12	protein-coding	no	no	82.902	yes
Pcdhgb4	NM_033576	chr18	37720376	37841870	+	4651	1	Pcdhgb4||Pcdhgb4|NM_033576|	400.18	417.54	432.44	230.41	352.07	-0.533129	0.000506833	0.14373	Mm.247203	NM_033576	ENSMUSG00000103585	-	-	18|18 B3	protocadherin gamma subfamily B, 4	protein-coding	no	no	366.528	yes
Icos	NM_017480	chr1	60977914	61000321	+	3246	1	Icos||Icos|NM_017480|	37.48	75.16	74.37	23.89	34.46	-1.11379	0.000502121	0.14373	Mm.42044	NM_017480	ENSMUSG00000026009	AILIM|CCLP|CRP-1|H4|Ly115	-	1 C2|1 30.6 cM	inducible T cell co-stimulator	protein-coding	no	no	49.072	yes
Tspan18	NM_183180	chr2	93201760	93334487	-	3732	1	Tspan18||Tspan18|NM_183180|	353.03	407.99	322.27	173.23	290.6	-0.655063	0.000498121	0.14373	Mm.274159	NM_183180	ENSMUSG00000027217	2610042G18Rik|6720430O15|BB226562	-	2|2 E1	tetraspanin 18	protein-coding	no	no	309.424	yes
C5ar1	NM_001173550	chr7	16246745	16259338	-	2537	1	C5ar1||C5ar1|NM_001173550|	527.12	549.96	596.79	823.5	665.03	0.404024	0.000488991	0.14373	Mm.247623	NM_007577	ENSMUSG00000049130	C5aR|C5r1|Cd88|D7Msu1	-	7 A2|7 8.77 cM	complement component 5a receptor 1	protein-coding	no	no	632.48	yes
Rai14	NM_001166408	chr15	10568978	10714631	-	4779	1	Rai14||Rai14|NM_001166408|	10.88	14.32	13.77	34.99	26.08	1.21534	0.000533645	0.147387	Mm.212395	NM_030690	ENSMUSG00000022246	1700008J19Rik|1700020L11Rik|Ankycorbin|Norpeg|mKIAA1334	-	15|15 A1	retinoic acid induced 14	protein-coding	no	no	20.008	yes
Treml1	NM_027763	chr17	48359916	48367176	+	1239	1	Treml1||Treml1|NM_027763|	95.51	137.19	127.62	235.53	152.75	0.682968	0.000543087	0.147387	Mm.90177	NM_027763	ENSMUSG00000023993	5430401J17Rik|TLT-1	-	17|17 C	triggering receptor expressed on myeloid cells-like 1	protein-coding	no	no	149.72	yes
Phf7	NR_153761	chr14	31237689	31251315	-	2093	1	Phf7||Phf7|NR_153761|	62.87	88.28	86.3	23.89	54.02	-1.04521	0.000539679	0.147387	Mm.5348	NM_027949	ENSMUSG00000021902	1700006H01Rik|1700010P14Rik|AI427892|AW555949	-	14|14 B	PHD finger protein 7	protein-coding	no	no	63.072	yes
Plpp3	NM_080555	chr4	105157347	105232767	+	3151	1	Plpp3||Plpp3|NM_080555|	89.47	85.89	92.73	131.42	130.4	0.537537	0.000558978	0.150086	Mm.348326	NM_080555	ENSMUSG00000028517	1110003O22Rik|2610002D05Rik|AV025606|D4Bwg0538e|D4Bwg1535e|Lpp3|PRG-2|Ppab2b|Ppap2b	-	4 C6|4 49.18 cM	phospholipid phosphatase 3	protein-coding	no	no	105.982	yes
Sik1	NM_010831	chr17	31844248	31855804	-	4496	1	Sik1||Sik1|NM_010831|	243.01	186.1	366.34	446.31	395.85	0.653663	0.000599016	0.154261	Mm.290941	NM_010831	ENSMUSG00000024042	Hrt-20|Msk|Sik|Sik-1|Snf1lk	-	17 B1|17 17.25 cM	salt inducible kinase 1	protein-coding	no	no	327.522	yes
Epas1	NM_010137	chr17	86753864	86833410	+	5321	1	Epas1||Epas1|NM_010137|	33.85	53.68	51.42	91.31	71.72	0.799547	0.000605088	0.154261	Mm.1415	NM_010137	ENSMUSG00000024140	HIF-2alpha|HIF2A|HLF|HRF|MOP2|bHLHe73	-	17|17 E4	endothelial PAS domain protein 1	protein-coding	no	no	60.396	yes
Prkn	NM_016694	chr17	10840359	12063366	+	3209	1	Prkn||Prkn|NM_016694|	61.66	50.1	57.84	10.24	36.33	-1.30554	0.000615645	0.155383	Mm.311110	NM_016694	ENSMUSG00000023826	Park2	-	17 A1|17 7.8 cM	parkin RBR E3 ubiquitin protein ligase	protein-coding	no	no	43.234	yes
Slc6a1	NM_178703	chr6	114282635	114317525	+	4264	1	Slc6a1||Slc6a1|NM_178703|	33.85	46.53	44.99	79.36	66.13	0.784877	0.000622458	0.155547	Mm.5260	NM_178703	ENSMUSG00000030310	A730043E01|GABATHG|GABATR|GAT-1|Gabt|Gabt1|Gat1|XT-1|Xtrp1	-	6|6 E3	solute carrier family 6 (neurotransmitter transporter, GABA), member 1	protein-coding	no	no	54.172	yes
Clec4a3	NM_153197	chr6	122952644	122969878	+	1293	1	Clec4a3||Clec4a3|NM_153197|	165.63	169.4	177.2	125.45	122.02	-0.476465	0.000659214	0.161533	Mm.25684	NM_153197	ENSMUSG00000043832	3110037K17Rik|Dcir3	-	6|6 F2	C-type lectin domain family 4, member a3	protein-coding	no	no	151.94	yes
E330020D12Rik	NR_033736	chr1	153404186	153414233	-	2820	1	E330020D12Rik||E330020D12Rik|NR_033736|	30.22	60.84	83.55	138.25	94.07	0.976534	0.000697639	0.161663	Mm.31556	NM_001177359		EG626058|F430003O07Rik|Gm6648	-	1|1 G3	Riken cDNA E330020D12 gene	ncRNA	no	no	81.386	yes
Syne1	NM_001347711	chr10	5020196	5488314	-	28115	1	Syne1||Syne1|NM_001347711|	27.81	34.6	33.05	61.44	54.02	0.846217	0.000698174	0.161663	Mm.331626	NM_022027	ENSMUSG00000096054	8B|A330049M09Rik|BE692247|C130039F11Rik|CPG2|KASH1|Myne1|mKIAA1756|myne-1	-	10|10 A1	spectrin repeat containing, nuclear envelope 1	protein-coding	no	no	42.184	yes
Nrbp2	NM_001358359	chr15	76085515	76091690	-	3223	1	Nrbp2||Nrbp2|NM_001358359|	8.46	26.25	24.79	37.55	55.88	1.20056	0.000695268	0.161663	Mm.101946	NM_144847	ENSMUSG00000075590	BC011468	-	15|15 D3	nuclear receptor binding protein 2	protein-coding	no	no	30.586	yes
Gm37013	NM_001174154	chr18	36952648	37841872	+	4614	1	Gm37013||Gm37013|NM_001174154|	321.59	345.96	367.25	180.06	290.6	-0.568502	0.000691192	0.161663	Mm.247203	NM_001174154	ENSMUSG00000103458	Cnr1|Pcdha4|Pcdha4-g	-	18 B2-B3|18	predicted gene, 37013	protein-coding	no	no	301.092	yes
Gm38667	NM_001301259	chr18	36973802	37841872	+	4588	1	Gm38667||Gm38667|NM_001301259|	321.59	345.96	367.25	180.06	290.6	-0.568502	0.000691192	0.161663		NM_001301259		Pcdha7-g	-	18 B2-B3|18	predicted gene, 38667	protein-coding	no	no	301.092	yes
Gm38666	NM_001301256	chr18	36967631	37841872	+	4618	1	Gm38666||Gm38666|NM_001301256|	321.59	345.96	367.25	180.06	290.6	-0.568502	0.000691192	0.161663		NM_001301256		Pcdha6-g	-	18 B2-B3|18	predicted gene, 38666	protein-coding	no	no	301.092	yes
Treml2	NM_001033405	chr17	48300038	48312534	+	4500	1	Treml2||Treml2|NM_001033405|	43.52	40.56	46.82	133.13	54.02	1.09063	0.000712375	0.163451	Mm.329104	NM_001033405	ENSMUSG00000071068	AW049306|Gm750|Tlt2	-	17|17 C	triggering receptor expressed on myeloid cells-like 2	protein-coding	no	no	63.61	yes
Neat1	NR_131212	chr19	5824710	5845478	-	20768	1	Neat1||Neat1|NR_131212|	571.86	1484.05	1661.82	2098.44	2770.96	0.971201	0.000731191	0.164773	Mm.281895	NR_003513	ENSMUSG00000092274	2310043N10Rik|VINC	-	19|19 A	nuclear paraspeckle assembly transcript 1 (non-protein coding)	ncRNA	no	no	1717.43	yes
Slc4a4	NM_001359211	chr5	88887260	89239656	+	7535	1	Slc4a4||Slc4a4|NM_001359211|	22.97	42.95	33.05	61.44	61.47	0.884587	0.000743582	0.165081	Mm.41044	NM_018760	ENSMUSG00000060961	AI835705|NBC|NBC1	-	5|5 E1	solute carrier family 4 (anion exchanger), member 4	protein-coding	no	no	44.376	yes
Klf10	NM_013692	chr15	38294406	38300711	-	3049	1	Klf10||Klf10|NM_013692|	415.89	293.47	345.22	458.26	534.63	0.483626	0.000745643	0.165081	Mm.4292	NM_013692	ENSMUSG00000037465	AI115143|EGR[a]|Egral|Gdnfif|TIEG-1|Tieg|Tieg1|mGIF	-	15|15 B3.1	Kruppel-like factor 10	protein-coding	no	no	409.494	yes
Dusp27	NM_001160049	chr1	166098148	166127898	-	4010	1	Dusp27||Dusp27|NM_001160049|	107.6	72.77	93.65	157.02	127.6	0.629307	0.000760452	0.165457	Mm.35315	NM_001033344	ENSMUSG00000026564	C130085G02Rik|Gm209	-	1|1 H2.3	dual specificity phosphatase 27 (putative)	protein-coding	no	no	111.728	yes
Pcdhga5	NM_033588	chr18	37694375	37841870	+	4659	1	Pcdhga5||Pcdhga5|NM_033588|	346.98	381.75	390.21	223.58	316.68	-0.481597	0.000760002	0.165457	Mm.247203	NM_033588	ENSMUSG00000103567	-	-	18|18 B3	protocadherin gamma subfamily A, 5	protein-coding	no	no	331.84	yes
Alpk1	NM_027808	chr3	127670310	127780527	-	4768	1	Alpk1||Alpk1|NM_027808|	120.9	114.52	128.54	205.66	152.75	0.552101	0.000796841	0.165937	Mm.158704	NM_027808	ENSMUSG00000028028	8430410J10Rik|LAK	-	3|3 G2	alpha-kinase 1	protein-coding	no	no	144.474	yes
Aldoc	NM_009657	chr11	78324198	78327778	+	2705	1	Aldoc||Aldoc|NM_009657|	36.27	45.33	46.82	73.39	70.79	0.732896	0.000834976	0.165937	Mm.7729	NM_009657	ENSMUSG00000017390	AI847350|AU040929|Aldo3|Scrg2	-	11 B5|11 46.74 cM	aldolase C, fructose-bisphosphate	protein-coding	no	no	54.52	yes
Pcdhgc4	NM_033582	chr18	37815079	37841872	+	5016	1	Pcdhgc4||Pcdhgc4|NM_033582|	321.59	351.92	371.84	185.18	294.33	-0.556171	0.000782778	0.165937	Mm.247203	NM_033582	ENSMUSG00000023036	-	-	18|18 B3	protocadherin gamma subfamily C, 4	protein-coding	no	no	304.972	yes
Pcdhga8	NM_033591	chr18	37725706	37841872	+	4722	1	Pcdhga8||Pcdhga8|NM_033591|	328.85	361.47	380.11	200.54	302.71	-0.520478	0.000824175	0.165937	Mm.247203	NM_033591	ENSMUSG00000103897	mKIAA4054	-	18|18 B3	protocadherin gamma subfamily A, 8	protein-coding	no	no	314.736	yes
Tmem88	NM_025915	chr11	69396516	69398234	-	1582	1	Tmem88||Tmem88|NM_025915|	50.78	36.98	76.21	116.06	84.76	0.851326	0.0008215	0.165937	Mm.390406	NM_025915	ENSMUSG00000045377	2600017H02Rik	-	11|11 B3	transmembrane protein 88	protein-coding	no	no	72.958	yes
4930481A15Rik	NR_015545	chr19	5406815	5422847	+	2156	1	4930481A15Rik||4930481A15Rik|NR_015545|	101.56	138.38	169.85	40.11	97.8	-1.00527	0.00082886	0.165937	Mm.388511	NR_015545	ENSMUSG00000086938	-	-	19|19 A	RIKEN cDNA 4930481A15 gene	ncRNA	no	no	109.54	yes
Grin2c	NM_010350	chr11	115249169	115267243	-	4866	1	Grin2c||Grin2c|NM_010350|	2.42	21.47	23.87	38.4	50.3	1.43447	0.000824543	0.165937	Mm.39090	NM_010350	ENSMUSG00000020734	GluN2C|NMDAR2C|NR2C	-	11 E2|11 80.8 cM	glutamate receptor, ionotropic, NMDA2C (epsilon 3)	protein-coding	no	no	27.292	yes
Pcdhgb5	NM_033577	chr18	37730971	37841870	+	4698	1	Pcdhgb5||Pcdhgb5|NM_033577|	331.26	360.28	379.19	207.37	302.71	-0.501435	0.000809566	0.165937	Mm.247203	NM_033577	ENSMUSG00000103749	-	-	18|18 B3	protocadherin gamma subfamily B, 5	protein-coding	no	no	316.162	yes
Pcdhga11	NM_033594	chr18	37755773	37841872	+	4706	1	Pcdhga11||Pcdhga11|NM_033594|	337.31	365.05	388.37	227	308.3	-0.458411	0.000831878	0.165937	Mm.247203	NM_033594	ENSMUSG00000102742	-	-	18|18 B3	protocadherin gamma subfamily A, 11	protein-coding	no	no	325.206	yes
Rnf157	NM_027258	chr11	116336345	116413032	-	4618	1	Rnf157||Rnf157|NM_027258|	114.85	143.16	124.87	55.47	98.73	-0.745004	0.0008108	0.165937	Mm.426344	NM_027258	ENSMUSG00000052949	2610036E23Rik|A130073L17Rik|mKIAA1917	-	11|11 E2	ring finger protein 157	protein-coding	no	no	107.416	yes
Ptprz1	NM_001081306	chr6	22875502	23052916	+	8009	1	Ptprz1||Ptprz1|NM_001081306|	19.34	31.02	19.28	46.94	45.64	0.996835	0.000847209	0.165941	Mm.41639	NM_011219	ENSMUSG00000068748	AI850339|DSD-1-PG|PTPbeta|PTPzeta|Ptprz|Ptpz|R-PTP-zeta|RPTPz|Rptpbeta	-	6|6 A3.1	protein tyrosine phosphatase, receptor type Z, polypeptide 1	protein-coding	no	no	32.444	yes
Pcdhga1	NM_033584	chr18	37661775	37841870	+	4700	1	Pcdhga1||Pcdhga1|NM_033584|	382.04	404.42	422.34	261.99	343.69	-0.427824	0.000854721	0.165941	Mm.247203	NM_033584	ENSMUSG00000103144	-	-	18|18 B3	protocadherin gamma subfamily A, 1	protein-coding	no	no	362.896	yes
Tmem106c	NM_201359	chr15	97964229	97970286	+	1620	1	Tmem106c||Tmem106c|NM_201359|	157.17	155.09	160.67	93.87	125.74	-0.538317	0.000853042	0.165941	Mm.196630	NM_201359	ENSMUSG00000052369	AI046681|BC046621|D15Ertd405e	-	15 F1|15 53.96 cM	transmembrane protein 106C	protein-coding	no	no	138.508	yes
Zc3h6	NM_178404	chr2	128967402	129018563	+	4893	1	Zc3h6||Zc3h6|NM_178404|	169.26	298.24	194.64	75.1	158.34	-0.935411	0.000868769	0.167381	Mm.26377	NM_178404	ENSMUSG00000042851	4631426G04Rik|4833425H18Rik|AU024389|AW060453|Zc3hdc6|mKIAA2035	-	2|2 F1	zinc finger CCCH type containing 6	protein-coding	no	no	179.116	yes
Gpr162	NM_001355257	chr6	124858445	124863983	-	2847	1	Gpr162||Gpr162|NM_001355257|	60.45	42.95	60.6	93.02	85.69	0.69106	0.000882812	0.168798	Mm.2514	NM_013533	ENSMUSG00000038390	A-2|BC031437|Grca	-	6 F2|6 59.17 cM	G protein-coupled receptor 162	protein-coding	no	no	68.542	yes
Il7r	NM_008372	chr15	9506159	9529876	-	3195	1	Il7r||Il7r|NM_008372|	240.59	291.08	270.85	367.8	341.83	0.396648	0.000903822	0.170857	Mm.389	NM_008372	ENSMUSG00000003882	CD127|IL-7Ralpha	-	15 A1|15 4.16 cM	interleukin 7 receptor	protein-coding	no	no	302.43	yes
Slc7a1	NM_001301424	chr5	148327410	148392815	-	7038	1	Slc7a1||Slc7a1|NM_001301424|	210.37	272	224.02	317.45	323.2	0.434516	0.000907123	0.170857	Mm.275489	NM_007513	ENSMUSG00000041313	4831426K01Rik|AI447493|Atrc-1|Atrc1|Cat1|Rec-1|Rev-1|mCAT-1	-	5 G3|5 88.48 cM	solute carrier family 7 (cationic amino acid transporter, y+ system), member 1	protein-coding	no	no	269.408	yes
Arsb	NM_009712	chr13	93771679	93943016	+	3974	1	Arsb||Arsb|NM_009712|	1794.15	1844.32	1631.53	1111.95	1492.13	-0.447762	0.000932297	0.172706	Mm.300178	NM_009712	ENSMUSG00000042082	1110007C02Rik|AI480648|As-1|As-1r|As-1s|As-1t|As1|As1-r|As1-s|As1-t|Asr-1|Ast-1	-	13 C3|13 47.88 cM	arylsulfatase B	protein-coding	no	no	1574.82	yes
Pcdhgb1	NM_033574	chr18	37680272	37841870	+	4677	1	Pcdhgb1||Pcdhgb1|NM_033574|	334.89	355.5	373.68	197.13	302.71	-0.521798	0.000937469	0.172706	Mm.247203	NM_033574	ENSMUSG00000103037	-	-	18|18 B3	protocadherin gamma subfamily B, 1	protein-coding	no	no	312.782	yes
A730008H23Rik	NM_172505	chr1	88264828	88277557	-	2208	1	A730008H23Rik||A730008H23Rik|NM_172505|	415.89	101.4	249.73	93.87	115.5	-1.30775	0.000946011	0.173017	Mm.384762	NM_172505		Fleg1	-	-	RIKEN cDNA A730008H23 gene	protein-coding	no	no	195.278	yes
Zfp948	NM_001357347	chr17	21566978	21588699	+	2830	1	Zfp948||Zfp948|NM_001357347|	12.09	14.32	14.69	36.7	25.15	1.15788	0.000953465	0.173126	Mm.441097	NM_001002008	ENSMUSG00000067931	-	-	17|17 A3.2	zinc finger protein 948	protein-coding	no	no	20.59	yes
Pcdhga6	NM_033589	chr18	37707101	37841870	+	4661	1	Pcdhga6||Pcdhga6|NM_033589|	330.06	357.89	386.53	207.37	305.5	-0.49874	0.00097971	0.176621	Mm.247203	NM_033589	ENSMUSG00000103793	-	-	18|18 B3	protocadherin gamma subfamily A, 6	protein-coding	no	no	317.47	yes
Itga4	NM_010576	chr2	79255426	79333114	+	9777	1	Itga4||Itga4|NM_010576|	30.22	36.98	38.56	64	58.68	0.780476	0.00101384	0.181477	Mm.31903	NM_010576	ENSMUSG00000027009	CD49D|Itga4B	-	2 C3|2 47.38 cM	integrin alpha 4	protein-coding	no	no	45.688	yes
Pcdhga9	NM_033592	chr18	37736936	37841863	+	4710	1	Pcdhga9||Pcdhga9|NM_033592|	332.47	365.05	380.11	210.78	307.37	-0.48793	0.0010308	0.183213	Mm.247203	NM_033592	ENSMUSG00000102440	-	-	18|18 B3	protocadherin gamma subfamily A, 9	protein-coding	no	no	319.156	yes
Hivep1	NM_007772	chr13	42052021	42185026	+	8736	1	Hivep1||Hivep1|NM_007772|	534.38	437.82	428.77	782.54	556.99	0.508119	0.0010552	0.185958	Mm.4808	NM_007772	ENSMUSG00000021366	Cryabp1	-	13 A4|13 20.72 cM	human immunodeficiency virus type I enhancer binding protein 1	protein-coding	no	no	548.1	yes
Pcdhga4	NM_033587	chr18	37685237	37841870	+	4690	1	Pcdhga4||Pcdhga4|NM_033587|	353.03	378.17	401.22	237.24	323.2	-0.446158	0.00106098	0.185958	Mm.247203	NM_033587	ENSMUSG00000103677	-	-	18|18 B3	protocadherin gamma subfamily A, 4	protein-coding	no	no	338.572	yes
Pcdhgc5	NM_033583	chr18	37819546	37841872	+	4700	1	Pcdhgc5||Pcdhgc5|NM_033583|	324.01	355.5	371.84	191.16	299.92	-0.529952	0.00112085	0.193762	Mm.247203	NM_033583	ENSMUSG00000102543	-	-	18|18 B3	protocadherin gamma subfamily C, 5	protein-coding	no	no	308.486	yes
Grasp	NM_019518	chr15	101224207	101232756	+	1999	1	Grasp||Grasp|NM_019518|	81	45.33	74.37	92.16	144.37	0.800647	0.00115304	0.196633	Mm.276573	NM_019518	ENSMUSG00000000531	tamalin	-	15|15 F1	GRP1 (general receptor for phosphoinositides 1)-associated scaffold protein	protein-coding	no	no	87.446	yes
Gm2a	NM_010299	chr11	55097985	55113028	+	4249	1	Gm2a||Gm2a|NM_010299|	753.2	719.36	663.81	553.84	564.44	-0.361267	0.00119084	0.201715	Mm.287807	NM_010299	ENSMUSG00000000594	AA408702|AW215435|GM2-AP|SAP-3	-	11 B1.3|11 32.13 cM	GM2 ganglioside activator protein	protein-coding	no	no	650.93	yes
Pcdhga2	NM_033585	chr18	37668927	37841870	+	4708	1	Pcdhga2||Pcdhga2|NM_033585|	360.28	375.78	392.04	212.49	325.06	-0.500953	0.00125802	0.202304	Mm.247203	NM_033585	ENSMUSG00000103332	mKIAA0588	-	18|18 B3	protocadherin gamma subfamily A, 2	protein-coding	no	no	333.13	yes
Pstpip1	NM_011193	chr9	56089976	56128890	+	1822	1	Pstpip1||Pstpip1|NM_011193|	18.13	15.51	20.2	36.7	35.39	0.980445	0.00121259	0.202304	Mm.2534	NM_011193	ENSMUSG00000032322	CD2BP1|def-2	-	9|9 B	proline-serine-threonine phosphatase-interacting protein 1	protein-coding	no	no	25.186	yes
Daam2	NM_001008231	chr17	49456022	49564337	-	5994	1	Daam2||Daam2|NM_001008231|	13.3	44.14	29.38	47.79	83.83	1.16673	0.00126645	0.202304	Mm.211275	NM_001008231	ENSMUSG00000040260	2310016D11Rik|AI843643|AW557870	-	17|17 C	dishevelled associated activator of morphogenesis 2	protein-coding	no	no	43.688	yes
Gja1	NM_010288	chr10	56377300	56390419	+	3102	1	Gja1||Gja1|NM_010288|	45.94	50.1	70.7	88.75	92.21	0.671931	0.00125569	0.202304	Mm.378921	NM_010288	ENSMUSG00000050953	AU042049|AW546267|Cnx43|Cx43|Cx43alpha1|Gja-1|Npm1|connexin43	-	10 B4|10 28.64 cM	gap junction protein, alpha 1	protein-coding	no	no	69.54	yes
Cx3cr1	NM_009987	chr9	120048683	120068296	-	3750	1	Cx3cr1||Cx3cr1|NM_009987|	3550.82	3581.28	2837.04	2417.61	2575.36	-0.429372	0.00124675	0.202304	Mm.44065	NM_009987	ENSMUSG00000052336	-	-	9|9 F4	chemokine (C-X3-C motif) receptor 1	protein-coding	no	no	2992.42	yes
Fgfr3	NM_001163217	chr5	33722306	33737068	+	3987	1	Fgfr3||Fgfr3|NM_001163217|	16.93	36.98	28.46	45.23	65.2	0.987207	0.00126066	0.202304	Mm.6904	NM_008010	ENSMUSG00000054252	CD333|FR3|Fgfr-3|Flg-2|HBGFR|Mfr3|sam3	-	5 B2|5 17.83 cM	fibroblast growth factor receptor 3	protein-coding	no	no	38.56	yes
G6pc3	NM_175935	chr11	102189699	102194081	+	1532	1	G6pc3||G6pc3|NM_175935|	250.26	294.66	284.62	184.33	228.2	-0.43801	0.0012456	0.202304	Mm.22385	NM_175935	ENSMUSG00000034793	0710001K01Rik|AU019276|AU045429|AV128920|AW545836|UGRP	-	11|11 D	glucose 6 phosphatase, catalytic, 3	protein-coding	no	no	248.414	yes
Inf2	NM_198411	chr12	112588784	112615557	+	4556	1	Inf2||Inf2|NM_198411|	10.88	20.28	22.95	42.67	33.53	1.04466	0.00121595	0.202304	Mm.250193	NM_198411	ENSMUSG00000037679	2610204M08Rik|AA589465|AW125550|EG629699	-	12|12 F1	inverted formin, FH2 and WH2 domain containing	protein-coding	no	no	26.062	yes
	NM_001370968	chr5	71657921	72149572	+	14382	1	Gabrb1||Gabrb1|NM_001370968|	9.67	16.7	18.36	38.4	27.94	1.12188	0.00127532	0.202439									no	no	22.214	yes
Inpp5f	NM_178641	chr7	128611365	128696436	+	4701	1	Inpp5f||Inpp5f|NM_178641|	135.41	128.84	141.39	187.74	181.63	0.436652	0.00128693	0.203004	Mm.490344	NM_178641	ENSMUSG00000042105	5830435P03Rik|AI115354|AW561896|SAC2|cI-27|hSAC2|mKIAA0966	-	7|7 F3	inositol polyphosphate-5-phosphatase F	protein-coding	no	no	155.002	yes
Pcdhga7	NM_033590	chr18	37714834	37841872	+	4652	1	Pcdhga7||Pcdhga7|NM_033590|	337.31	373.4	390.21	197.13	315.75	-0.533545	0.00132242	0.206029	Mm.247203	NM_033590	ENSMUSG00000103472	-	-	18|18 B3	protocadherin gamma subfamily A, 7	protein-coding	no	no	322.76	yes
Chd2	NM_001081345	chr7	73426652	73541746	-	8994	1	Chd2||Chd2|NM_001081345|	726.61	715.78	818.98	1034.29	896.02	0.344331	0.00134552	0.20834	Mm.34539	NM_001081345	ENSMUSG00000078671	2810013C04Rik|2810040A01Rik|5630401D06Rik|AI851092|BC029703|CHD-2	-	7|7 D1	chromodomain helicase DNA binding protein 2	protein-coding	no	no	838.336	yes
Cul7	NM_025611	chr17	46650338	46664364	+	5478	1	Cul7||Cul7|NM_025611|	187.39	139.58	194.64	102.4	134.12	-0.575038	0.00138706	0.209888	Mm.329078	NM_025611	ENSMUSG00000038545	2510004L20Rik|AA409809|C230011P08Rik|p185|p193	-	17|17 C	cullin 7	protein-coding	no	no	151.626	yes
Aqp4	NM_001308647	chr18	15389394	15402999	-	5329	1	Aqp4||Aqp4|NM_001308647|	12.09	13.12	18.36	29.87	32.6	1.06072	0.00140548	0.209888	Mm.250786	NM_009700	ENSMUSG00000024411	WCH4	-	18 A1|18 8.74 cM	aquaporin 4	protein-coding	no	no	21.208	yes
Mcc	NM_001085373	chr18	44425060	44812182	-	7821	1	Mcc||Mcc|NM_001085373|	19.34	17.89	20.2	31.57	47.5	1.02043	0.00138799	0.209888	Mm.312511	NM_001033406	ENSMUSG00000071856	D18Ertd451e|E330037C19	-	18 B3|18 23.74 cM	mutated in colorectal cancers	protein-coding	no	no	27.3	yes
Nr4a3	NM_015743	chr4	48045305	48086446	+	5554	1	Nr4a3||Nr4a3|NM_015743|	43.52	31.02	39.48	52.91	89.42	0.883565	0.00143733	0.209888	Mm.247261	NM_015743	ENSMUSG00000028341	AI573420|CHN|CSMF|MINOR|NOR-1|Nor1|TEC	-	4|4 B1	nuclear receptor subfamily 4, group A, member 3	protein-coding	no	no	51.27	yes
Srxn1	NM_029688	chr2	152105524	152111376	+	2809	1	Srxn1||Srxn1|NM_029688|	30.22	27.44	32.13	88.75	39.12	1.08446	0.00139852	0.209888	Mm.218639	NM_029688	ENSMUSG00000032802	1700127B04Rik|AI854065|AW488194|Npn3|Srx|Srx1|TX01	-	2|2 G3	sulfiredoxin 1 homolog (S. cerevisiae)	protein-coding	no	no	43.532	yes
Arhgap23	NM_021493	chr11	97450160	97502400	+	5413	1	Arhgap23||Arhgap23|NM_021493|	38.69	72.77	61.52	106.67	86.62	0.7324	0.00144635	0.209888	Mm.394118	NM_021493	ENSMUSG00000049807	A330041B18Rik	-	11|11 D	Rho GTPase activating protein 23	protein-coding	no	no	73.254	yes
Siglece	NM_031181	chr7	43651070	43660161	-	1836	1	Siglece||Siglece|NM_031181|	388.09	454.52	437.95	261.13	367.91	-0.455916	0.00144513	0.209888	Mm.157702	NM_031181	ENSMUSG00000030474	Cd170|Siglec12|Siglec5|Siglec9|Siglecl1|mSiglec-E	-	7 B3|7	sialic acid binding Ig-like lectin E	protein-coding	no	no	381.92	yes
Nfatc1	NM_001164109	chr18	80647435	80713071	-	4782	1	Nfatc1||Nfatc1|NM_001164109|	784.64	779.01	759.3	1083.78	911.86	0.354124	0.00149387	0.21545	Mm.329560	NM_016791	ENSMUSG00000033016	2210017P03Rik|AI449492|AV076380|NF-ATc|NFAT2|NFATc|Nfatcb	-	18 E3|18 53.66 cM	nuclear factor of activated T cells, cytoplasmic, calcineurin dependent 1	protein-coding	no	no	863.718	yes
Zfp518b	NM_001081144	chr5	38668484	38684826	-	6875	1	Zfp518b||Zfp518b|NM_001081144|	77.38	84.7	90.9	131.42	114.56	0.530298	0.00151347	0.217037	Mm.38277	NM_001081144	ENSMUSG00000046572	6820424L24Rik|AA410078|AI661722|Znf518b	-	5|5 B3	zinc finger protein 518B	protein-coding	no	no	99.792	yes
Syt11	NM_018804	chr3	88744701	88772599	-	4560	1	Syt11||Syt11|NM_018804|	186.19	242.17	261.67	375.48	278.49	0.495408	0.00157291	0.222998	Mm.379376	NM_018804	ENSMUSG00000068923	1500004A13Rik|3632445O20Rik|5430404N14Rik|6530420C11Rik|AI851970	-	3 F1|3 38.96 cM	synaptotagmin XI	protein-coding	no	no	268.8	yes
Nceh1	NM_178772	chr3	27183004	27244911	+	4385	1	Nceh1||Nceh1|NM_178772|	181.35	145.54	170.77	126.3	110.84	-0.494278	0.00158154	0.222998	Mm.24576	NM_178772	ENSMUSG00000027698	Aadacl1|B230106I24Rik|CPO-BP|Nceh	-	3|3 A3	neutral cholesterol ester hydrolase 1	protein-coding	no	no	146.96	yes
Jdp2	NM_001205053	chr12	85600018	85639878	+	1552	1	Jdp2||Jdp2|NM_001205053|	73.75	72.77	137.72	139.95	176.04	0.711886	0.00159921	0.223264	Mm.103560	NM_030887	ENSMUSG00000034271	Jundm2|Jundp2|TIF	-	12|12 D2	Jun dimerization protein 2	protein-coding	no	no	120.046	yes
Lcor	NM_001370767	chr19	41482682	41596160	+	15205	1	Lcor||Lcor|NM_001370767|	414.69	551.15	503.14	789.37	570.96	0.463834	0.00164376	0.225858	Mm.422910	NM_172154	ENSMUSG00000025019	3110023F06Rik|A630025C20Rik|Mlr2|mKIAA1795	-	19|19 C3	ligand dependent nuclear receptor corepressor	protein-coding	no	no	565.862	yes
Slc6a11	NM_172890	chr6	114131241	114249886	+	4039	1	Slc6a11||Slc6a11|NM_172890|	25.39	62.03	67.02	101.55	88.48	0.862252	0.00164658	0.225858	Mm.44683	NM_172890	ENSMUSG00000030307	D930045G19Rik|E130202I16Rik|GAT4|Gabt4|Gat3	-	6 E3|6 52.98 cM	solute carrier family 6 (neurotransmitter transporter, GABA), member 11	protein-coding	no	no	68.894	yes
Mbd4	NM_010774	chr6	115840697	115853341	-	3569	1	Mbd4||Mbd4|NM_010774|	101.56	89.47	103.75	62.3	69.86	-0.588057	0.00165717	0.226082	Mm.259308	NM_010774	ENSMUSG00000030322	Med1	-	6 E3|6 53.72 cM	methyl-CpG binding domain protein 4	protein-coding	no	no	85.388	yes
Hivep2	NM_001358782	chr10	13966379	14151378	+	9831	1	Hivep2||Hivep2|NM_001358782|	81	128.84	120.28	224.44	135.06	0.698021	0.00166779	0.226309	Mm.42157	NM_010437	ENSMUSG00000015501	Gm20114|MIBP-1|MIBP1|Schnurri-2|Shn-2	-	10|10 A2	human immunodeficiency virus type I enhancer binding protein 2	protein-coding	no	no	137.924	yes
Prkaca	NM_008854	chr8	83972978	83996442	+	2271	1	Prkaca||Prkaca|NM_008854|	281.7	292.28	319.51	232.12	234.72	-0.366051	0.00168618	0.22758	Mm.19111	NM_008854	ENSMUSG00000005469	PKCD|Pkaca	-	8|8 C2	protein kinase, cAMP dependent, catalytic, alpha	protein-coding	no	no	272.066	yes
Gpr35	NM_022320	chr1	92978903	92986391	+	4230	1	Gpr35||Gpr35|NM_022320|	191.02	165.82	197.4	351.59	209.57	0.592417	0.00175948	0.228362	Mm.152780	NM_022320	ENSMUSG00000026271	KPG_007	-	1|1 D	G protein-coupled receptor 35	protein-coding	no	no	223.08	yes
Prdm15	NM_144789	chr16	97791467	97851227	-	6299	1	Prdm15||Prdm15|NM_144789|	139.03	141.96	168.94	217.61	192.8	0.435599	0.00172105	0.228362	Mm.328741	NM_144789	ENSMUSG00000014039	C21orf83|E130018M06Rik|ORF62|Zfp298	-	16|16 C4	PR domain containing 15	protein-coding	no	no	172.068	yes
Pim1	NM_008842	chr17	29490785	29496110	+	2653	1	Pim1||Pim1|NM_008842|	197.07	158.66	198.32	236.38	264.52	0.423025	0.00175593	0.228362	Mm.328931	NM_008842	ENSMUSG00000024014	Pim-1	-	17 A3.3|17 15.38 cM	proviral integration site 1	protein-coding	no	no	210.99	yes
Il1rl1	NM_001025602	chr1	40439629	40465414	+	5278	1	Il1rl1||Il1rl1|NM_001025602|	53.2	38.17	51.42	139.1	55.88	1.02399	0.00170717	0.228362	Mm.289824	NM_010743	ENSMUSG00000026069	DER4|Fit-1|Ly84|ST2L|St2|St2-rs1|T1|T1/ST2	-	1 B|1 19.19 cM	interleukin 1 receptor-like 1	protein-coding	no	no	67.554	yes
Foxn2	NM_001355742	chr17	88440704	88490533	+	5330	1	Foxn2||Foxn2|NM_001355742|	172.89	187.3	191.89	272.23	224.47	0.421734	0.00175762	0.228362	Mm.112824	NM_180974	ENSMUSG00000034998	3230402J05Rik|6030465J18Rik|Fkh19|Foxn1|HTLF	-	17|17 E4	forkhead box N2	protein-coding	no	no	209.756	yes
Plekha5	NM_144920	chr6	140424099	140594906	+	5072	1	Plekha5||Plekha5|NM_144920|	31.43	60.84	56.01	104.96	71.72	0.82353	0.0017211	0.228362	Mm.247670	NM_144920	ENSMUSG00000030231	2810431N21Rik|AI428202|AK129423|AMH-Cre|Ayu21-9|Gt(pU21)9Imeg|Pepp2|Tg(AMH-cre)1Flor	-	6|6 G2	pleckstrin homology domain containing, family A member 5	protein-coding	no	no	64.992	yes
Hepacam	NM_175189	chr9	37367606	37386571	+	3075	1	Hepacam||Hepacam|NM_175189|	15.72	26.25	29.38	38.4	57.75	0.979052	0.00176435	0.228362	Mm.266133	NM_175189	ENSMUSG00000046240	2900042E01Rik|Glialcam|Hepn1	-	9|9 A4	hepatocyte cell adhesion molecule	protein-coding	no	no	33.5	yes
Pcbp4	NM_021567	chr9	106453838	106464011	+	2013	1	Pcbp4||Pcbp4|NM_021567|	16.93	23.86	44.99	69.12	49.37	1.01303	0.00179518	0.231166	Mm.286394	NM_021567	ENSMUSG00000023495	1200003L19Rik|AlphaCP-4	-	9|9 F1	poly(rC) binding protein 4	protein-coding	no	no	40.854	yes
2700081O15Rik	NM_175381	chr19	7417625	7425904	+	4980	1	2700081O15Rik||2700081O15Rik|NM_175381|	299.83	244.56	302.98	462.53	329.72	0.476356	0.00181965	0.233128	Mm.386838	NM_175381	ENSMUSG00000053080	AI255177|AI848741|AW742297	-	19|19 A	RIKEN cDNA 2700081O15 gene	protein-coding	no	no	327.924	yes
Lonrf1	NM_001081150	chr8	36216062	36249359	-	3752	1	Lonrf1||Lonrf1|NM_001081150|	148.71	143.16	157.92	197.98	203.05	0.404773	0.00183405	0.233786	Mm.324032	NM_001081150	ENSMUSG00000039633	-	-	8|8 A4	LON peptidase N-terminal domain and ring finger 1	protein-coding	no	no	170.164	yes
Tmem156	NM_001370814	chr5	65062710	65091609	-	3347	1	Tmem156||Tmem156|NM_001370814|	65.29	68	65.19	121.18	86.62	0.645406	0.00184364	0.233827	Mm.297688	NM_001370814	ENSMUSG00000037913	Col28a1|Gm446	-	5|5 C3.1	transmembrane protein 156	protein-coding	no	no	81.256	yes
Vti1a	NM_001360431	chr19	55316057	55627461	+	4614	1	Vti1a||Vti1a|NM_001360431|	198.28	231.44	191.89	125.45	169.52	-0.50353	0.00191084	0.241138	Mm.258637	NM_016862	ENSMUSG00000024983	1110014F16Rik|1110018K19Rik|4921537J05Rik|MVti1|MVti1a|Vti1|Vti1-rp2	-	19|19 D2	vesicle transport through interaction with t-SNAREs 1A	protein-coding	no	no	183.316	yes
Cyb5d2	NM_001024926	chr11	72777232	72795839	-	2369	1	Cyb5d2||Cyb5d2|NM_001024926|	126.94	126.45	130.38	86.19	97.8	-0.489305	0.0019265	0.241331	Mm.194755	NM_001024926	ENSMUSG00000057778	9330151E16Rik|Gm2	-	11|11 B4	cytochrome b5 domain containing 2	protein-coding	no	no	113.552	yes
Gdap10	NR_045032	chr12	32824116	32826908	+	2792	1	Gdap10||Gdap10|NR_045032|	41.11	20.28	22.95	64.86	46.57	0.987245	0.00194105	0.241331	Mm.440246	NR_045032		Gdap-ps	-	12|12 A3	ganglioside-induced differentiation-associated-protein 10	ncRNA	no	no	39.154	yes
Nod2	NM_145857	chr8	88647347	88688474	+	4596	1	Nod2||Nod2|NM_145857|	59.24	57.26	56.01	107.52	76.38	0.672139	0.00205399	0.252881	Mm.222633	NM_145857	ENSMUSG00000055994	ACUG|BLAU|CD|Card15|F830032C23Rik|IBD1|Nlrc2	-	8|8 C3	nucleotide-binding oligomerization domain containing 2	protein-coding	no	no	71.282	yes
AI661453	NM_145489	chr17	47436639	47470638	+	5023	1	AI661453||AI661453|NM_145489|	49.57	48.91	56.92	93.02	71.72	0.654709	0.00213745	0.255039	Mm.218444	NM_145489	ENSMUSG00000034382	-	-	17|17 C	expressed sequence AI661453	protein-coding	no	no	64.028	yes
Rfc2	NM_020022	chr5	134582690	134598328	+	1497	1	Rfc2||Rfc2|NM_020022|	130.57	132.42	135.88	87.9	104.32	-0.483027	0.00216087	0.256048	Mm.332739	NM_020022	ENSMUSG00000023104	2610008M13Rik|40kDa|AI326953|Recc2	-	5 G2|5 74.68 cM	replication factor C (activator 1) 2	protein-coding	no	no	118.218	yes
Ngp	NM_008694	chr9	110419808	110423012	+	1154	1	Ngp||Ngp|NM_008694|	239.38	172.98	156.08	112.65	137.85	-0.609679	0.00225933	0.263997	Mm.236225	NM_008694	ENSMUSG00000032484	bectenecin	-	9|9 F2	neutrophilic granule protein	protein-coding	no	no	163.788	yes
Sept4	NM_001368776	chr11	87578420	87590538	+	1752	1	Septin4||Septin4|NM_001368776|	15.72	20.28	33.97	41.82	50.3	0.932157	0.00225235	0.263997	Mm.2214	NM_011129	ENSMUSG00000020486	ARTS|Bh5|Pnutl2	-	11|11 C	septin 4	protein-coding	no	no	32.418	yes
Pcdhgb6	NM_033578	chr18	37742094	37841872	+	4676	1	Pcdhgb6||Pcdhgb6|NM_033578|	340.94	376.98	395.72	222.73	325.06	-0.454975	0.00231695	0.269482	Mm.247203	NM_033578	ENSMUSG00000103088	-	-	18|18 B3	protocadherin gamma subfamily B, 6	protein-coding	no	no	332.286	yes
Adarb1	NM_001024837	chr10	77290727	77418273	-	6565	1	Adarb1||Adarb1|NM_001024837|	64.08	54.88	67.94	118.62	81.03	0.66821	0.00236054	0.273293	Mm.276815	NM_130895	ENSMUSG00000020262	1700057H01Rik|AW124433|AW558573|Adar2|BB220382|D10Bwg0447e|Red1	-	10 C1|10 39.72 cM	adenosine deaminase, RNA-specific, B1	protein-coding	no	no	77.31	yes
Pcdhga10	NM_033593	chr18	37747016	37841870	+	4699	1	Pcdhga10||Pcdhga10|NM_033593|	337.31	366.24	400.31	216.76	322.27	-0.465792	0.00238208	0.273311	Mm.247203	NM_033593	ENSMUSG00000102222	-	-	18|18 B3	protocadherin gamma subfamily A, 10	protein-coding	no	no	328.578	yes
Ttyh2	NM_053273	chr11	114675468	114720984	+	3429	1	Ttyh2||Ttyh2|NM_053273|	50.78	87.09	82.63	139.1	98.73	0.680916	0.00238236	0.273311	Mm.271934	NM_053273	ENSMUSG00000034714	1110001A03Rik	-	11|11 E2	tweety family member 2	protein-coding	no	no	91.666	yes
Prnp	NM_001278256	chr2	131909928	131938436	+	3725	1	Prnp||Prnp|NM_001278256|	31.43	40.56	48.66	68.27	64.27	0.693031	0.00262791	0.277411	Mm.648	NM_011170	ENSMUSG00000079037	AA960666|AI325101|CD230|PrP|PrP<C>|PrPC|PrPSc|Prn-i|Prn-p|Sinc|prP27-30|prP33-35C	-	2 F2|2 64.07 cM	prion protein	protein-coding	no	no	50.638	yes
Prkab2	NM_182997	chr3	97658212	97673067	+	4246	1	Prkab2||Prkab2|NM_182997|	145.08	143.16	145.98	181.77	207.71	0.414713	0.00263017	0.277411	Mm.31175	NM_182997	ENSMUSG00000038205	5730553K21Rik|AW049591|BB124140	-	3|3 F2.2	protein kinase, AMP-activated, beta 2 non-catalytic subunit	protein-coding	no	no	164.74	yes
Phlpp1	NM_133821	chr1	106171869	106394245	+	6071	1	Phlpp1||Phlpp1|NM_133821|	143.87	131.23	159.76	227	176.04	0.462198	0.00264117	0.277411	Mm.24115	NM_133821	ENSMUSG00000044340	AI836256|Phlpp|Plekhe1|SCOP|mKIAA0606	-	1|1 E2.1	PH domain and leucine rich repeat protein phosphatase 1	protein-coding	no	no	167.58	yes
Tcaf1	NM_001355770	chr6	42668002	42710115	-	5374	1	Tcaf1||Tcaf1|NM_001355770|	64.08	69.19	81.71	146.78	86.62	0.691071	0.00248979	0.277411	Mm.24652	NM_029930	ENSMUSG00000036667	2810407D09Rik|3321401G04Rik|A230020K05Rik|AI848529|Fam115a	-	6 B2.1|6	TRPM8 channel-associated factor 1	protein-coding	no	no	89.676	yes
Atp1b2	NM_013415	chr11	69599728	69605960	-	2968	1	Atp1b2||Atp1b2|NM_013415|	58.03	144.35	112.01	190.3	162.07	0.738605	0.00251774	0.277411	Mm.235204	NM_013415	ENSMUSG00000041329	Amog|Atpb-2	-	11 B3|11 42.86 cM	ATPase, Na+/K+ transporting, beta 2 polypeptide	protein-coding	no	no	133.352	yes
Ninl	NM_207204	chr2	150934519	151009398	-	5046	1	Ninl||Ninl|NM_207204|	101.56	66.81	100.08	148.49	121.08	0.575778	0.00265769	0.277411	Mm.120911	NM_207204	ENSMUSG00000068115	4930519N13Rik|Gm1004|Gm1634|mKIAA0980	-	2|2 G3	ninein-like	protein-coding	no	no	107.604	yes
Ctsf	NM_019861	chr19	4855165	4860918	+	1918	1	Ctsf||Ctsf|NM_019861|	425.57	441.4	429.69	337.08	358.59	-0.325409	0.00248721	0.277411	Mm.29561	NM_019861	ENSMUSG00000083282	AI481912	-	19|19 A	cathepsin F	protein-coding	no	no	398.466	yes
Pts	NM_001364490	chr9	50521617	50528656	-	1234	1	Pts||Pts|NM_001364490|	122.11	172.98	150.57	82.78	118.29	-0.579337	0.00266622	0.277411	Mm.35856	NM_011220	ENSMUSG00000032067	PTPS	-	9|9 A5.3	6-pyruvoyl-tetrahydropterin synthase	protein-coding	no	no	129.346	yes
Espl1	NM_001356312	chr15	102296293	102324356	+	6623	1	Espl1||Espl1|NM_001356312|	203.11	233.82	195.56	119.47	176.97	-0.522912	0.00266236	0.277411	Mm.288324	NM_001014976	ENSMUSG00000058290	AL024103|AU045071|Cerp|ESP1|PRCE|SSE	-	15|15 F3	extra spindle pole bodies 1, separase	protein-coding	no	no	185.786	yes
Ezr	NM_009510	chr17	6738131	6782780	-	3045	1	Ezr||Ezr|NM_009510|	32.64	29.82	24.79	52.91	48.43	0.803515	0.00264478	0.277411	Mm.277812	NM_009510	ENSMUSG00000052397	AW146364|R75297|Vil2|p81	-	17|17 A1	ezrin	protein-coding	no	no	37.718	yes
Cryzl2	NM_001033284	chr1	157458568	157489062	+	1613	1	Cryzl2||Cryzl2|NM_001033284|	100.35	102.6	101.91	52.91	81.03	-0.61931	0.00249934	0.277411	Mm.215960	NM_001033284	ENSMUSG00000033488	-	-	1|1 H1	crystallin zeta like 2	protein-coding	no	no	87.76	yes
Pcdhga12	NM_033595	chr18	37765580	37841872	+	5072	1	Pcdhga12||Pcdhga12|NM_033595|	340.94	376.98	393.88	217.61	326	-0.463666	0.0026038	0.277411	Mm.247203	NM_033595	ENSMUSG00000102428	Pcdh13|pc2c	-	18|18 B3	protocadherin gamma subfamily A, 12	protein-coding	no	no	331.082	yes
Dph2	NM_026344	chr4	117888643	117892003	-	2515	1	Dph2||Dph2|NM_026344|	73.75	62.03	81.71	110.94	102.46	0.538505	0.00248118	0.277411	Mm.13823	NM_026344	ENSMUSG00000028540	9130020C19Rik|AI467389|Dph2l2	-	4|4 D2.1	DPH2 homolog	protein-coding	no	no	86.178	yes
Pcdhgb7	NM_033579	chr18	37751619	37841870	+	4684	1	Pcdhgb7||Pcdhgb7|NM_033579|	327.64	366.24	386.53	220.17	315.75	-0.44299	0.00266948	0.277411	Mm.247203	NM_033579	ENSMUSG00000104063	-	-	18|18 B3	protocadherin gamma subfamily B, 7	protein-coding	no	no	323.266	yes
Stk38l	NM_172734	chr6	146724930	146778814	+	4590	1	Stk38l||Stk38l|NM_172734|	107.6	121.68	129.46	193.72	146.23	0.495461	0.00259831	0.277411	Mm.322121	NM_172734	ENSMUSG00000001630	4930473A22Rik|Ndr2|Ndr54	-	6|6 G3	serine/threonine kinase 38 like	protein-coding	no	no	139.738	yes
Sgsh	NM_018822	chr11	119343489	119355510	-	4309	1	Sgsh||Sgsh|NM_018822|	275.65	272	274.52	210.78	218.88	-0.362712	0.00246157	0.277411	Mm.103788	NM_018822	ENSMUSG00000005043	4632406A19Rik	-	11 E2|11 83.36 cM	N-sulfoglucosamine sulfohydrolase (sulfamidase)	protein-coding	no	no	250.366	yes
Prkar1b	NM_008923	chr5	139017304	139129752	-	2611	1	Prkar1b||Prkar1b|NM_008923|	101.56	110.95	101.91	40.11	83.83	-0.77767	0.00260566	0.277411	Mm.306163	NM_008923	ENSMUSG00000025855	AI385716|RIbeta	-	5 G2|5 77.74 cM	protein kinase, cAMP dependent regulatory, type I beta	protein-coding	no	no	87.672	yes
Aldh1l2	NM_153543	chr10	83487447	83534140	-	5985	1	Aldh1l2||Aldh1l2|NM_153543|	45.94	50.1	37.64	80.22	65.2	0.709303	0.00251438	0.277411	Mm.263138	NM_153543	ENSMUSG00000020256	D330038I09Rik|mtFDH	-	10|10 C1	aldehyde dehydrogenase 1 family, member L2	protein-coding	no	no	55.82	yes
Tmem86a	NM_026436	chr7	47050640	47054776	+	1786	1	Tmem86a||Tmem86a|NM_026436|	825.74	852.97	703.29	609.31	636.16	-0.363652	0.00272922	0.281154	Mm.27338	NM_026436	ENSMUSG00000010307	1810054O13Rik|AI414959|AW742698	-	7|7 B3	transmembrane protein 86A	protein-coding	no	no	725.494	yes
Dusp16	NM_130447	chr6	134715468	134792628	-	5099	1	Dusp16||Dusp16|NM_130447|	359.07	403.22	337.87	493.25	453.6	0.359466	0.00279137	0.283674	Mm.491182	NM_130447	ENSMUSG00000030203	3830417M17Rik|AW558566|D6Ertd213e|MKP-7|MKP7|Mkpm	-	6 G1|6 65.77 cM	dual specificity phosphatase 16	protein-coding	no	no	409.402	yes
Phlda1	NM_009344	chr10	111506286	111508649	+	1950	1	Phlda1||Phlda1|NM_009344|	39.9	23.86	39.48	54.62	65.2	0.774368	0.00280452	0.283674	Mm.3117	NM_009344	ENSMUSG00000020205	DT1P1B11|TDAG51|Tdag	-	10|10 D1	pleckstrin homology like domain, family A, member 1	protein-coding	no	no	44.612	yes
Chpf2	NR_155297	chr5	24586744	24594398	+	5362	1	Chpf2||Chpf2|NR_155297|	510.2	481.96	520.58	726.22	576.55	0.358045	0.0027736	0.283674	Mm.140672	NM_133913	ENSMUSG00000038181	2010209O12Rik|AW060945|Gm42230|mKIAA1402|mir-671	-	5|5 A3	chondroitin polymerizing factor 2	protein-coding	no	no	563.102	yes
Sema4a	NM_013658	chr3	88435962	88455761	-	3195	1	Sema4a||Sema4a|NM_013658|	85.84	99.02	125.78	174.09	131.33	0.542404	0.00280988	0.283674	Mm.439752	NM_013658	ENSMUSG00000028064	AI132332|SemB|Semab	-	3|3 F1	sema domain, immunoglobulin domain (Ig), transmembrane domain (TM) and short cytoplasmic domain, (semaphorin) 4A	protein-coding	no	no	123.212	yes
Znrf3	NM_001290501	chr11	5276329	5381740	-	7182	1	Znrf3||Znrf3|NM_001290501|	116.06	104.98	93.65	166.41	135.06	0.520667	0.00280012	0.283674	Mm.216313	NM_001080924	ENSMUSG00000041961	Gm1167	-	11|11 A1	zinc and ring finger 3	protein-coding	no	no	123.232	yes
Lgi4	NM_144556	chr7	31059935	31070935	+	3427	1	Lgi4||Lgi4|NM_144556|	368.74	430.66	452.64	592.24	487.13	0.35904	0.00285544	0.285112	Mm.389870	NM_144556	ENSMUSG00000036560	Lgil3|clp	-	7 B1|7 19.29 cM	leucine-rich repeat LGI family, member 4	protein-coding	no	no	466.282	yes
Sdhc	NM_025321	chr1	171129157	171150603	-	1168	1	Sdhc||Sdhc|NM_025321|	206.74	206.38	223.11	162.14	165.79	-0.385033	0.00285801	0.285112	Mm.198138	NM_025321	ENSMUSG00000058076	0610010E03Rik|AI316496|AU019277	-	1|1 H3	succinate dehydrogenase complex, subunit C, integral membrane protein	protein-coding	no	no	192.832	yes
Fam160a2	NM_001242364	chr7	105371211	105400054	-	10872	1	Fam160a2||Fam160a2|NM_001242364|	243.01	287.5	280.03	400.23	315.75	0.395636	0.0028902	0.287188	Mm.30254	NM_199009	ENSMUSG00000044465	4632419K20Rik|6530415H11Rik|FHIP	-	7|7 E3	family with sequence similarity 160, member A2	protein-coding	no	no	305.304	yes
9130023H24Rik	NM_177001	chr7	128234451	128238031	-	3580	1	9130023H24Rik||9130023H24Rik|NM_177001|	107.6	175.37	146.9	64	111.77	-0.72194	0.0029815	0.295099	Mm.183647	NM_177001	ENSMUSG00000062944	GLI4	-	7|7 F3	RIKEN cDNA 9130023H24 gene	protein-coding	no	no	121.128	yes
Kmt2d	NM_001033276	chr15	98831669	98871205	-	19718	1	Kmt2d||Kmt2d|NM_001033276|	2694.85	2811.82	2476.21	4171.29	3002.88	0.416974	0.00300587	0.295196	Mm.264889	NM_001033276	ENSMUSG00000048154	ALR|BC032281|BC058659|C430014K11Rik|KMT2B|Mll2|Mll4	-	15|15 F1	lysine (K)-specific methyltransferase 2D	protein-coding	no	no	3031.41	yes
Lag3	NM_008479	chr6	124904359	124911705	-	1988	1	Lag3||Lag3|NM_008479|	992.59	978.23	885.08	723.66	800.09	-0.335108	0.00300486	0.295196	Mm.4528	NM_008479	ENSMUSG00000030124	CD223|LAG-3|Ly66	-	6|6 F2	lymphocyte-activation gene 3	protein-coding	no	no	875.93	yes
Pcdhgc3	NM_033581	chr18	37806410	37841872	+	4679	1	Pcdhgc3||Pcdhgc3|NM_033581|	328.85	361.47	381.03	205.66	315.75	-0.470499	0.00304694	0.296918	Mm.247203	NM_033581	ENSMUSG00000102918	PC43|Pcdh2	-	18 B3|18 19.67 cM	protocadherin gamma subfamily C, 3	protein-coding	no	no	318.552	yes
Slc9a7	NM_177353	chrX	20098851	20291827	-	9403	1	Slc9a7||Slc9a7|NM_177353|	414.69	375.78	354.4	290.15	306.44	-0.366318	0.00303519	0.296918	Mm.40530	NM_177353	ENSMUSG00000037341	6330509M05Rik|A530087D17Rik|AI450287|NHE7	-	X|X A1.3	solute carrier family 9 (sodium/hydrogen exchanger), member 7	protein-coding	no	no	348.292	yes
Lap3	NM_024434	chr5	45493374	45512691	+	2242	1	Lap3||Lap3|NM_024434|	261.14	245.75	257.08	191.16	207.71	-0.365319	0.00314208	0.298131	Mm.286830	NM_024434	ENSMUSG00000039682	2410015L10Rik|AA410100|LAP-3|Lap|Lapep|Pep-7|Pep-S|Pep7|Peps	-	5 B3|5 24.98 cM	leucine aminopeptidase 3	protein-coding	no	no	232.568	yes
Gm9776	NR_045619	chr13	94356749	94358923	-	2174	1	Gm9776||Gm9776|NR_045619|	60.45	77.54	66.11	40.96	44.71	-0.67615	0.00313043	0.298131	Mm.174191	NM_183205	ENSMUSG00000042857	A530089L17	-	13 C3|13	predicted gene 9776	ncRNA	no	no	57.954	yes
Tril	NM_025817	chr6	53815468	53820825	-	5357	1	Tril||Tril|NM_025817|	18.13	29.82	31.22	49.5	44.71	0.809151	0.00313535	0.298131	Mm.422727	NM_025817	ENSMUSG00000043496	1200009O22Rik|AI316813|mKIAA0644	-	6|6 B3	TLR4 interactor with leucine-rich repeats	protein-coding	no	no	34.676	yes
Klhl21	NM_001033352	chr4	152008891	152017677	+	3888	1	Klhl21||Klhl21|NM_001033352|	178.93	171.79	191.89	250.89	224.47	0.381297	0.00312062	0.298131	Mm.22306	NM_001033352	ENSMUSG00000073700	1810045K06Rik|D330008A20|mKIAA0469	-	4|4 E2	kelch-like 21	protein-coding	no	no	203.594	yes
Foxred1	NM_001359815	chr9	35204221	35211055	-	2317	1	Foxred1||Foxred1|NM_001359815|	178.93	213.54	212.09	139.1	164.86	-0.423024	0.0030979	0.298131	Mm.138512	NM_172291	ENSMUSG00000039048	BC024806|TEG-23|Tex23	-	9 A4|9	FAD-dependent oxidoreductase domain containing 1	protein-coding	no	no	181.704	yes
Nuak2	NM_001195025	chr1	132316125	132333488	+	3117	1	Nuak2||Nuak2|NM_001195025|	484.81	416.34	640.86	704.89	674.34	0.410665	0.00309153	0.298131	Mm.100666	NM_028778	ENSMUSG00000009772	1200013B22Rik|Omphk2|Snark|mKIAA0537	-	1|1 E4	NUAK family, SNF1-like kinase, 2	protein-coding	no	no	584.248	yes
Kcnk12	NM_199251	chr17	87745821	87797994	-	1949	1	Kcnk12||Kcnk12|NM_199251|	258.73	221.89	280.95	189.45	201.19	-0.394664	0.00315685	0.298411	Mm.312046	NM_199251	ENSMUSG00000050138	mntk1	-	17|17 E4	potassium channel, subfamily K, member 12	protein-coding	no	no	230.442	yes
Vps51	NM_001081041	chr19	6067842	6077187	-	2612	1	Vps51||Vps51|NM_001081041|	275.65	305.4	305.74	461.67	333.45	0.417484	0.00321207	0.300354	Mm.227361	NM_001081041	ENSMUSG00000024797	1110014N23Rik|3110057M17Rik|AI837850|Ffr	-	19|19 A	VPS51 GARP complex subunit	protein-coding	no	no	336.382	yes
Glcci1	NM_133236	chr6	8509600	8597549	+	6186	1	Glcci1||Glcci1|NM_133236|	152.33	171.79	190.97	117.77	137.85	-0.445135	0.0032369	0.300354	Mm.210787	NM_133236	ENSMUSG00000029638	2310047L21Rik|A130036A18Rik|Fam117c|Gig18|Tssn1	-	6|6 A1	glucocorticoid induced transcript 1	protein-coding	no	no	154.142	yes
Nwd1	NM_176940	chr8	72646711	72714748	+	7687	1	Nwd1||Nwd1|NM_176940|	10.88	20.28	18.36	35.84	30.74	0.988842	0.00322571	0.300354	Mm.390076	NM_176940	ENSMUSG00000048148	A230063L24Rik	-	8|8 B3.3	NACHT and WD repeat domain containing 1	protein-coding	no	no	23.22	yes
Cirbp	NM_007705	chr10	80167839	80171656	+	1248	1	Cirbp||Cirbp|NM_007705|	194.65	306.59	211.17	119.47	188.15	-0.641095	0.00319018	0.300354	Mm.17898	NM_007705	ENSMUSG00000045193	Cirp|R74941	-	10 C1|10 39.72 cM	cold inducible RNA binding protein	protein-coding	no	no	204.006	yes
Farp2	NM_145519	chr1	93512104	93621976	+	3859	1	Farp2||Farp2|NM_145519|	29.02	29.82	25.71	16.21	11.18	-1.02786	0.00321885	0.300354	Mm.243091	NM_145519	ENSMUSG00000034066	AI465173|BC009153|D030026M03Rik|Fir|mKIAA0793	-	1|1 D	FERM, RhoGEF and pleckstrin domain protein 2	protein-coding	no	no	22.388	yes
Slc25a33	NM_027460	chr4	149744036	149774267	-	1864	1	Slc25a33||Slc25a33|NM_027460|	67.7	59.65	90.9	93.02	138.78	0.644401	0.00326144	0.301522	Mm.41877	NM_027460	ENSMUSG00000028982	5730438N18Rik|Pnc1	-	4|4 E2	solute carrier family 25, member 33	protein-coding	no	no	90.01	yes
Zmynd15	NM_001029929	chr11	70459433	70466201	+	2965	1	Zmynd15||Zmynd15|NM_001029929|	44.73	65.61	77.12	20.48	44.71	-0.964313	0.00329295	0.303324	Mm.425692	NM_001029929	ENSMUSG00000040829	-	-	11|11 B3	zinc finger, MYND-type containing 15	protein-coding	no	no	50.53	yes
Ncam1	NM_010875	chr9	49515139	49799069	-	4854	1	Ncam1||Ncam1|NM_010875|	10.88	27.44	20.2	33.28	47.5	1.02755	0.00331103	0.30388	Mm.4974	NM_010875	ENSMUSG00000039542	CD56|E-NCAM|NCAM-1|Ncam	-	9 A5.3|9 26.83 cM	neural cell adhesion molecule 1	protein-coding	no	no	27.86	yes
Zbtb10	NM_177660	chr3	9250567	9285332	+	7437	1	Zbtb10||Zbtb10|NM_177660|	160.8	190.87	185.46	231.26	237.51	0.37522	0.00334826	0.306184	Mm.103262	NM_177660	ENSMUSG00000069114	4832414A18|AU021107|RINZF	-	3|3 A1	zinc finger and BTB domain containing 10	protein-coding	no	no	201.18	yes
Nabp1	NM_028696	chr1	51469488	51478399	-	2827	1	Nabp1||Nabp1|NM_028696|	107.6	112.14	119.36	133.13	196.53	0.525618	0.00336104	0.306243	Mm.196290	NM_028696	ENSMUSG00000026107	4930434H03Rik|4930442A21Rik|4930488J04Rik|4933440J18Rik|5830411E10Rik|AI852561|Nbp1|Obfc2a|Ssb2	-	1|1 C1.1	nucleic acid binding protein 1	protein-coding	no	no	133.752	yes
Bri3bp	NM_001359486	chr5	125441568	125460885	+	7079	1	Bri3bp||Bri3bp|NM_001359486|	158.38	147.93	149.66	219.32	188.15	0.41503	0.00341606	0.310137	Mm.290720	NM_029752	ENSMUSG00000037905	2410150I18Rik|AI841257|AW742481	-	5|5 G1.1	Bri3 binding protein	protein-coding	no	no	172.688	yes
Pcgf2	NM_009545	chr11	97688823	97700497	-	2727	1	Pcgf2||Pcgf2|NM_009545|	19.34	27.44	22.95	47.79	37.26	0.863466	0.00348116	0.311318	Mm.2418	NM_009545	ENSMUSG00000018537	Mel18|Rnf110|Zfp144|mel-18	-	11 D|11 61.06 cM	polycomb group ring finger 2	protein-coding	no	no	30.956	yes
Usp38	NM_027554	chr8	80980733	81014906	-	4666	1	Usp38||Usp38|NM_027554|	307.08	272	277.28	365.24	364.18	0.343224	0.00350618	0.311594	Mm.246018	NM_027554	ENSMUSG00000038250	4631402N15Rik|4833420O05Rik|AA536967|AU044701|AW544820|mKIAA1891	-	8 C2|8 38.68 cM	ubiquitin specific peptidase 38	protein-coding	no	no	317.156	yes
Ahnak	NM_009643	chr19	8989284	9019196	+	18091	1	Ahnak||Ahnak|NM_009643|	50.78	41.75	61.52	74.24	87.55	0.627461	0.0035593	0.315204	Mm.203866	NM_009643	ENSMUSG00000069833	DY6	-	19|19 A	AHNAK nucleoprotein (desmoyokin)	protein-coding	no	no	63.168	yes
Rassf3	NM_138956	chr10	121410351	121476250	-	3415	1	Rassf3||Rassf3|NM_138956|	320.38	261.26	341.55	386.58	409.82	0.355744	0.00363969	0.318966	Mm.41265	NM_138956	ENSMUSG00000025795	AW212023|AW322379	-	10|10 D2	Ras association (RalGDS/AF-6) domain family member 3	protein-coding	no	no	343.918	yes
Fcer1g	NM_010185	chr1	171229572	171234349	-	649	1	Fcer1g||Fcer1g|NM_010185|	297.41	322.1	293.8	231.26	249.62	-0.351252	0.00362754	0.318966	Mm.22673	NM_010185	ENSMUSG00000058715	AI573376|CD23|FcR-gamma|FcR[g]|FcRgamma|Fce1g|FcepsilonRI|Ly-50	-	1 H3|1 79.23 cM	Fc receptor, IgE, high affinity I, gamma polypeptide	protein-coding	no	no	278.838	yes
Alg8	NM_199035	chr7	97371617	97392158	+	1976	1	Alg8||Alg8|NM_199035|	142.66	138.38	149.66	92.16	118.29	-0.46556	0.0036306	0.318966	Mm.279683	NM_199035	ENSMUSG00000035704	AI447372|Gm1089	-	7|7 E1	asparagine-linked glycosylation 8 (alpha-1,3-glucosyltransferase)	protein-coding	no	no	128.23	yes
Tbx6	NM_011538	chr7	126781483	126785548	+	1700	1	Tbx6||Tbx6|NM_011538|	93.09	136	186.38	209.08	204.91	0.560352	0.00372678	0.324346	Mm.727	NM_011538	ENSMUSG00000030699	rv	-	7 F3|7 69.25 cM	T-box 6	protein-coding	no	no	165.892	yes
Enho	NM_027147	chr4	41638144	41640302	-	1244	1	Enho||Enho|NM_027147|	14.51	20.28	11.02	33.28	28.87	1.03807	0.00379499	0.328019	Mm.372459	NM_027147	ENSMUSG00000028445	1110065P19Rik|2310040A07Rik	-	4|4 A5	energy homeostasis associated	protein-coding	no	no	21.592	yes
Slc7a11	NM_011990	chr3	50364936	50443613	-	9204	1	Slc7a11||Slc7a11|NM_011990|	27.81	31.02	26.63	46.94	49.37	0.750499	0.00387028	0.332252	Mm.260988	NM_011990	ENSMUSG00000027737	9930009M05Rik|AI451155|sut|xCT	-	3 C|3 21.72 cM	solute carrier family 7 (cationic amino acid transporter, y+ system), member 11	protein-coding	no	no	36.354	yes
Uhrf1bp1l	NM_029166	chr10	89744991	89819869	+	6405	1	Uhrf1bp1l||Uhrf1bp1l|NM_029166|	117.27	126.45	132.21	178.35	158.34	0.413488	0.00386368	0.332252	Mm.268922	NM_029166	ENSMUSG00000019951	2010319N22Rik|4930506D01Rik|AA589495|C80672|E030041M21Rik|mKIAA0701	-	10|10 C2	UHRF1 (ICBP90) binding protein 1-like	protein-coding	no	no	142.524	yes
Jag1	NM_013822	chr2	137081451	137116520	-	5442	1	Jag1||Jag1|NM_013822|	15.72	13.12	15.61	31.57	27.01	0.966658	0.00396543	0.334065	Mm.22398	NM_013822	ENSMUSG00000027276	ABE2|Gsfabe2|Htu|Ozz|Ser-1	-	2 F3|2 67.73 cM	jagged 1	protein-coding	no	no	20.606	yes
Clec7a	NR_132130	chr6	129461591	129472779	-	2268	1	Clec7a||Clec7a|NR_132130|	149.92	127.65	108.34	197.98	166.72	0.500338	0.00393663	0.334065	Mm.239516	NM_020008	ENSMUSG00000079293	BGR|Clecsf12|beta-GR	-	6|6 F3	C-type lectin domain family 7, member a	protein-coding	no	no	150.122	yes
Nucb1	NM_001163662	chr7	45492674	45510408	-	2614	1	Nucb1||Nucb1|NM_001163662|	634.72	670.45	616.07	502.64	541.15	-0.307557	0.00399319	0.334065	Mm.258923	NM_008749	ENSMUSG00000030824	B230337F23Rik|C77483|Calnuc|MTEST82|Nucb	-	7|7 B3	nucleobindin 1	protein-coding	no	no	593.006	yes
Hnrnpm	NM_029804	chr17	33646233	33685458	-	2501	1	Hnrnpm||Hnrnpm|NM_029804|	383.25	362.66	383.78	555.55	424.73	0.369691	0.00406078	0.334558	Mm.311439	NM_029804	ENSMUSG00000059208	2610023M21Rik|AA409009|Hnrpm|mKIAA4193	-	17|17 B1	heterogeneous nuclear ribonucleoprotein M	protein-coding	no	no	421.994	yes
BC005561	NM_001166581	chr5	104508350	104554207	+	9430	1	Thoc2l||Thoc2l|NM_001166581|	342.15	437.82	422.34	525.68	492.72	0.333229	0.00406947	0.334558	Mm.482189	NM_001166581	ENSMUSG00000079065	-	-	5|5 E5	cDNA sequence BC005561	protein-coding	no	no	444.142	yes
Galnt11	NM_144908	chr5	25222872	25265918	+	2539	1	Galnt11||Galnt11|NM_144908|	160.8	181.33	202.91	61.44	152.75	-0.781061	0.00406639	0.334558	Mm.246718	NM_144908	ENSMUSG00000038072	A430075I06Rik|AI648252|E430002F06Rik	-	5|5 A3	polypeptide N-acetylgalactosaminyltransferase 11	protein-coding	no	no	151.846	yes
Ipcef1	NM_001347225	chr10	6885801	6980281	-	5936	1	Ipcef1||Ipcef1|NM_001347225|	186.19	177.75	184.55	314.89	203.98	0.495945	0.00409331	0.335425	Mm.331674	NM_001033391	ENSMUSG00000064065	A130090K04Rik	-	10|10 A1	interaction protein for cytohesin exchange factors 1	protein-coding	no	no	213.472	yes
Zfyve28	NM_001015039	chr5	34194894	34288324	-	3955	1	Zfyve28||Zfyve28|NM_001015039|	91.88	127.65	122.11	57.18	91.28	-0.636917	0.00416136	0.338801	Mm.113388	NM_001015039	ENSMUSG00000037224	9630058O20Rik|Gm146|mKIAA1643	-	5|5 B2	zinc finger, FYVE domain containing 28	protein-coding	no	no	98.02	yes
Ganc	NM_172672	chr2	120403896	120460852	+	4757	1	Ganc||Ganc|NM_172672|	245.43	212.35	203.83	132.27	186.28	-0.483918	0.0041759	0.338893	Mm.38851	NM_172672	ENSMUSG00000062646	5830445O15Rik|9330160A12|mFLJ00088	-	2|2 E5	glucosidase, alpha; neutral C	protein-coding	no	no	196.032	yes
Retsat	NM_026159	chr6	72598602	72607488	+	1942	1	Retsat||Retsat|NM_026159|	82.21	62.03	85.39	38.4	57.75	-0.693325	0.00426839	0.345169	Mm.305108	NM_026159	ENSMUSG00000056666	0610039N19Rik|C80029|MMT-7|Ppsig	-	6|6 C1	retinol saturase (all trans retinol 13,14 reductase)	protein-coding	no	no	65.156	yes
H2-Q5	NR_051981	chr17	35394099	35395630	+	1176	1	H2-Q5||H2-Q5|NR_051981|	39.9	21.47	37.64	58.03	55.88	0.765523	0.0042806	0.345169	Mm.439648	NR_051981	ENSMUSG00000055413	H-2Q5|Qa-5|Qa5|Qat-5	-	17 B1|17 18.65 cM	histocompatibility 2, Q region locus 5	pseudo	no	no	42.584	yes
Zfp568	NM_001167873	chr7	29983955	30028282	+	7161	1	Zfp568||Zfp568|NM_001167873|	148.71	113.33	124.87	168.97	184.42	0.443684	0.00433259	0.347742	Mm.322432	NM_001033355	ENSMUSG00000074221	C80731|Gm1691|Znf568|chato	-	7|7 B1	zinc finger protein 568	protein-coding	no	no	148.06	yes
1700096K18Rik	NR_027388	chr5	25530018	25531466	+	1448	1	1700096K18Rik||1700096K18Rik|NR_027388|	21.76	46.53	38.56	18.77	14.9	-1.0849	0.00434006	0.347742	Mm.105263	NR_027388	ENSMUSG00000101856	-	-	5|5 B1	RIKEN cDNA 1700096K18 gene	ncRNA	no	no	28.104	yes
Ripk1	NM_001359997	chr13	34002363	34035170	+	4738	1	Ripk1||Ripk1|NM_001359997|	361.49	314.94	390.21	471.06	430.31	0.328086	0.00445016	0.348812	Mm.374799	NM_009068	ENSMUSG00000021408	D330015H01Rik|RIP|RIP-1|Rinp|Rip1	-	13 A3.3|13 14.01 cM	receptor (TNFRSF)-interacting serine-threonine kinase 1	protein-coding	no	no	393.602	yes
Tpbgl	NM_001195529	chr7	99624067	99627103	-	3036	1	Tpbgl||Tpbgl|NM_001195529|	706.05	761.11	730.84	503.49	657.58	-0.350254	0.0043987	0.348812	Mm.180719	NM_001195529	ENSMUSG00000096606	EG245190|Gm4980	-	7|7 E1	trophoblast glycoprotein-like	protein-coding	no	no	671.814	yes
Cspg4	NM_139001	chr9	56865104	56899870	+	8031	1	Cspg4||Cspg4|NM_139001|	13.3	17.89	11.94	28.16	28.87	0.989164	0.00438342	0.348812	Mm.41329	NM_139001	ENSMUSG00000032911	4732461B14Rik|AN2|NG2	-	9|9 B	chondroitin sulfate proteoglycan 4	protein-coding	no	no	20.032	yes
Mrtfa	NM_001082536	chr15	81012281	81190736	-	4318	1	Mrtfa||Mrtfa|NM_001082536|	472.72	479.57	519.66	655.39	568.16	0.306249	0.00443686	0.348812	Mm.439814	NM_153049	ENSMUSG00000042292	AMKL|Bsac|Mal|Mkl1|Mrtf-A	-	15|15 E1	myocardin related transcription factor A	protein-coding	no	no	539.1	yes
Lamb2	NM_008483	chr9	108479862	108490530	+	5559	1	Lamb2||Lamb2|NM_008483|	183.77	164.63	175.36	127.15	138.78	-0.405047	0.0044302	0.348812	Mm.27560	NM_008483	ENSMUSG00000052911	AW211941|Lamb-2|Lams|npht	-	9 F2|9 59.4 cM	laminin, beta 2	protein-coding	no	no	157.938	yes
Vegfa	NM_001287057	chr17	46016994	46032377	-	3445	1	Vegfa||Vegfa|NM_001287057|	31.43	29.82	33.05	43.52	65.2	0.767608	0.00450767	0.351379	Mm.282184	NM_009505	ENSMUSG00000023951	Vegf|Vpf	-	17 C|17 22.79 cM	vascular endothelial growth factor A	protein-coding	no	no	40.604	yes
Acot11	NM_001347159	chr4	106744555	106805007	-	5597	1	Acot11||Acot11|NM_001347159|	21.76	27.44	37.64	64	41.91	0.844674	0.00455202	0.352765	Mm.222956	NM_025590	ENSMUSG00000034853	1110020M10Rik|2010309H15Rik|AW060409|BFIT|BFIT1|Thea|Them1|mKIAA0707	-	4|4 C7	acyl-CoA thioesterase 11	protein-coding	no	no	38.55	yes
Smarcd3	NM_025891	chr5	24592622	24602002	-	1700	1	Smarcd3||Smarcd3|NM_025891|	10.88	17.89	18.36	29.01	32.6	0.937335	0.00457694	0.353264	Mm.436539	NM_025891	ENSMUSG00000028949	1500001J14Rik|2210409C08Rik|BAF60C	-	5|5 A3	SWI/SNF related, matrix associated, actin dependent regulator of chromatin, subfamily d, member 3	protein-coding	no	no	21.748	yes
Iqcn	NM_001370847	chr8	70702025	70717650	+	6083	1	Iqcn||Iqcn|NM_001370847|	20.55	28.63	42.23	40.96	78.24	0.931086	0.00459313	0.353433	Mm.462671	NM_001370846	ENSMUSG00000110622	Gm16486	-	8|8 B3.3	IQ motif containing N	protein-coding	no	no	42.122	yes
Tab1	NM_025609	chr15	80133146	80161706	+	2923	1	Tab1||Tab1|NM_025609|	162.01	201.61	227.7	297.83	236.58	0.424791	0.00467528	0.357574	Mm.288245	NM_025609	ENSMUSG00000022414	2310012M03Rik|Map3k7ip1|b2b449Clo	-	15|15 E1	TGF-beta activated kinase 1/MAP3K7 binding protein 1	protein-coding	no	no	225.146	yes
Atg2a	NM_194348	chr19	6241668	6262304	+	6261	1	Atg2a||Atg2a|NM_194348|	308.29	320.91	333.28	389.14	408.89	0.301037	0.00469467	0.357694	Mm.277384	NM_194348	ENSMUSG00000024773	1810013C15Rik|A830054M12|BC023754|mKIAA0404	-	19|19 A	autophagy related 2A	protein-coding	no	no	352.102	yes
Siglech	NM_178706	chr7	55768184	55778925	+	2472	1	Siglech||Siglech|NM_178706|	1593.46	1703.55	1410.26	1087.2	1361.73	-0.373349	0.00475287	0.360234	Mm.44425	NM_178706	ENSMUSG00000051504	6430529G09Rik|Siglec-H	-	7|7 B5	sialic acid binding Ig-like lectin H	protein-coding	no	no	1431.24	yes
Spen	NM_001347235	chr4	141467890	141538597	-	12201	1	Spen||Spen|NM_001347235|	817.28	663.29	746.44	981.38	898.82	0.327722	0.00483523	0.365378	Mm.299906	NM_019763	ENSMUSG00000040761	Mint|mKIAA0929	-	4|4 D3	spen family transcription repressor	protein-coding	no	no	821.442	yes
Ganab	NM_008060	chr19	8898057	8916742	+	3925	1	Ganab||Ganab|NM_008060|	610.54	670.45	633.51	510.32	541.15	-0.292011	0.00492167	0.369007	Mm.3196	NM_008060	ENSMUSG00000071650	AU042638|G2an|GluII|mKIAA0088	-	19|19 A	alpha glucosidase 2 alpha neutral subunit	protein-coding	no	no	593.194	yes
Pyroxd2	NM_029011	chr19	42725858	42752775	-	3088	1	Pyroxd2||Pyroxd2|NM_029011|	298.62	380.56	367.25	165.55	308.3	-0.573885	0.00491442	0.369007	Mm.329858	NM_029011	ENSMUSG00000060224	3830409H07Rik|4833409A17Rik	-	19|19 C3	pyridine nucleotide-disulphide oxidoreductase domain 2	protein-coding	no	no	304.056	yes
AW011738	NR_030671	chr4	156203284	156206028	+	2744	1	AW011738||AW011738|NR_030671|	84.63	78.74	58.76	118.62	102.46	0.58043	0.00498316	0.3721	Mm.461024	NR_030671		-	-	4|4 E2	expressed sequence AW011738	ncRNA	no	no	88.642	yes
Rbm15	NM_001045807	chr3	107326110	107333289	-	3267	1	Rbm15||Rbm15|NM_001045807|	221.25	153.89	185.46	281.61	232.85	0.450461	0.00513193	0.37327	Mm.27966	NM_001045807	ENSMUSG00000048109	C230088J01Rik|mKIAA1438	-	3|3 F2.3	RNA binding motif protein 15	protein-coding	no	no	215.012	yes
Frg2f1	NM_001004178	chr4	119530315	119538769	-	1895	1	Frg2f1||Frg2f1|NM_001004178|	30.22	41.75	52.33	8.53	28.87	-1.17696	0.0050555	0.37327	Mm.425205	NM_001004178	ENSMUSG00000087385	AA415398	-	4|4 D2.1	FSHD region gene 2 family member 1	protein-coding	no	no	32.34	yes
Plod1	NM_011122	chr4	147909753	147936776	-	3215	1	Plod1||Plod1|NM_011122|	666.16	675.22	660.14	518.85	579.34	-0.294163	0.00509575	0.37327	Mm.23951	NM_011122	ENSMUSG00000019055	2410042F05Rik|AI854890|AV007929|Lh1|Plod	-	4 E2|4 78.57 cM	procollagen-lysine, 2-oxoglutarate 5-dioxygenase 1	protein-coding	no	no	619.942	yes
Trpm7	NM_001164325	chr2	126791558	126876261	-	7065	1	Trpm7||Trpm7|NM_001164325|	494.48	473.61	419.59	743.29	513.21	0.43048	0.00505446	0.37327	Mm.244705	NM_021450	ENSMUSG00000027365	2310022G15Rik|4833414K03Rik|5033407O22Rik|CHAK|CHAK1|LTrpC-7|Ltpr7|Ltrpc7|TRPPLIK	-	2|2 F1	transient receptor potential cation channel, subfamily M, member 7	protein-coding	no	no	528.836	yes
Capza2	NM_007604	chr6	17637010	17666972	+	2491	1	Capza2||Capza2|NM_007604|	823.33	838.65	803.37	667.34	693.9	-0.284489	0.00512971	0.37327	Mm.392504	NM_007604	ENSMUSG00000015733	1110053K06Rik|AW208808|Cappa2	-	6 A2|6 7.96 cM	capping protein (actin filament) muscle Z-line, alpha 2	protein-coding	no	no	765.318	yes
Btbd2	NM_145361	chr10	80642617	80657071	-	3009	1	Btbd2||Btbd2|NM_145361|	262.35	295.86	286.46	139.1	251.48	-0.544837	0.00508967	0.37327	Mm.60720	NM_145361	ENSMUSG00000003344	2610037C03Rik|4930512K17Rik	-	10|10 C1	BTB (POZ) domain containing 2	protein-coding	no	no	247.05	yes
Scaf4	NM_178923	chr16	90228951	90284503	-	4409	1	Scaf4||Scaf4|NM_178923|	238.17	292.28	304.82	368.66	341.83	0.337507	0.00520785	0.375545	Mm.439811	NM_178923	ENSMUSG00000022983	AA517739|Sfrs15|Sra4|Srsf15	-	16|16 C3.3	SR-related CTD-associated factor 4	protein-coding	no	no	309.152	yes
H2-Q9	NM_001201460	chr17	35439167	35443770	+	1508	1	H2-Q9||H2-Q9|NM_001201460|	35.06	17.89	26.63	41.82	54.95	0.849841	0.00520764	0.375545	Mm.431282	NM_001201460		H-2Q9|Ped|Qa-2|Qa-9|Qa9	-	17|17	histocompatibility 2, Q region locus 9	protein-coding	no	no	35.27	yes
H2-Q7	NM_010394	chr17	35439155	35443773	+	1523	1	H2-Q7||H2-Q7|NM_010394|	35.06	17.89	26.63	41.82	54.95	0.849841	0.00520764	0.375545	Mm.431282	NM_010394	ENSMUSG00000060550	H-2Q7|Ped|Q9|Qa-2|Qa-7|Qa7	-	17 B1|17 18.67 cM	histocompatibility 2, Q region locus 7	protein-coding	no	no	35.27	yes
Ptpn23	NM_001081043	chr9	110385089	110408210	-	5287	1	Ptpn23||Ptpn23|NM_001081043|	540.42	602.45	653.71	716.83	760.03	0.288274	0.00522291	0.375558	Mm.335477	NM_001081043	ENSMUSG00000036057	AI462446|PTP-TD14	-	9|9 F2	protein tyrosine phosphatase, non-receptor type 23	protein-coding	no	no	654.688	yes
Arhgap21	NM_001081364	chr2	20847919	20967721	-	6895	1	Arhgap21||Arhgap21|NM_001081364|	169.26	163.44	182.71	255.16	201.19	0.398074	0.00524954	0.376401	Mm.28507	NM_001081364	ENSMUSG00000036591	5530401C11Rik|AA416458|ARHGAP10	-	2|2 A3	Rho GTPase activating protein 21	protein-coding	no	no	194.352	yes
Zbtb22	NM_020625	chr17	33916176	33919325	+	2604	1	Zbtb22||Zbtb22|NM_020625|	229.71	239.79	219.43	300.39	284.08	0.339771	0.00529462	0.378558	Mm.482096	NM_020625	ENSMUSG00000051390	1110008J20Rik|AI265210|AI415166|Bing1|Zfp297	-	17|17 B1	zinc finger and BTB domain containing 22	protein-coding	no	no	254.68	yes
Hic2	NM_178922	chr16	17233587	17263430	+	6334	1	Hic2||Hic2|NM_178922|	176.51	252.91	280.03	289.29	363.25	0.447841	0.00536827	0.381657	Mm.261602	NM_178922	ENSMUSG00000050240	AA409108|HRG22|mKIAA1020	-	16|16 A3	hypermethylated in cancer 2	protein-coding	no	no	272.398	yes
Rinl	NM_177158	chr7	28788969	28798966	+	2851	1	Rinl||Rinl|NM_177158|	250.26	270.8	285.54	153.61	240.31	-0.466468	0.00538332	0.381657	Mm.74632	NM_177158	ENSMUSG00000051735	5830482F20Rik|9930116N10Rik	-	7|7 B1	Ras and Rab interactor-like	protein-coding	no	no	240.104	yes
Caskin1	NM_027937	chr17	24488783	24508907	+	6135	1	Caskin1||Caskin1|NM_027937|	24.18	25.05	25.71	41.82	43.78	0.760746	0.0054345	0.384205	Mm.70989	NM_027937	ENSMUSG00000033597	3300002N10Rik|C130061I24|C630036E02Rik|mKIAA1306	-	17|17 A3.3	CASK interacting protein 1	protein-coding	no	no	32.108	yes
Ephb3	NM_010143	chr16	21204795	21223304	+	4114	1	Ephb3||Ephb3|NM_010143|	62.87	89.47	108.34	144.22	114.56	0.554401	0.00553363	0.390121	Mm.6972	NM_010143	ENSMUSG00000005958	AW456895|Cek10|Etk2|HEK2|MDK5|Sek4|Tyro6	-	16|16 B1	Eph receptor B3	protein-coding	no	no	103.892	yes
Gas2l3	NM_001079876	chr10	89408823	89443967	-	6727	1	Gas2l3||Gas2l3|NM_001079876|	42.31	33.4	34.89	64.86	54.95	0.6961	0.00563697	0.396299	Mm.11982	NM_001033331	ENSMUSG00000074802	8430435B07Rik|Gm240	-	10|10 C2	growth arrest-specific 2 like 3	protein-coding	no	no	46.082	yes
Shroom1	NM_027917	chr11	53457205	53467766	+	3297	1	Shroom1||Shroom1|NM_027917|	30.22	29.82	34.89	59.74	45.64	0.71981	0.00579354	0.40505	Mm.274370	NM_027917	ENSMUSG00000018387	Apx|Shrm1	-	11|11 B1.3	shroom family member 1	protein-coding	no	no	40.062	yes
4930447M23Rik	NR_126563	chr2	19344317	19352251	+	2331	1	4930447M23Rik||4930447M23Rik|NR_126563|	41.11	64.42	44.07	22.19	33.53	-0.849977	0.00585143	0.407208	Mm.107666	NR_126563		-	-	2|2 A3	RIKEN cDNA 4930447M23 gene	ncRNA	no	no	41.064	yes
Bcl6	NM_001348026	chr16	23965050	23981283	-	4725	1	Bcl6||Bcl6|NM_001348026|	314.34	354.31	479.27	480.45	528.11	0.382855	0.00585667	0.407208	Mm.347398	NM_009744	ENSMUSG00000022508	Bcl5	-	16 B1|16 15.26 cM	B cell leukemia/lymphoma 6	protein-coding	no	no	431.296	yes
Osbpl3	NM_001347213	chr6	50293327	50456354	-	7117	1	Osbpl3||Osbpl3|NM_001347213|	45.94	79.93	72.53	121.18	86.62	0.639496	0.00595416	0.412849	Mm.44153	NM_027881	ENSMUSG00000029822	1200014M06Rik|6720421I08Rik|A530055M08|ORP-3|ORP3|OSBP3	-	6|6 B2.3	oxysterol binding protein-like 3	protein-coding	no	no	81.24	yes
Timp2	NM_011594	chr11	118301061	118355411	-	3613	1	Timp2||Timp2|NM_011594|	1623.68	1591.42	1449.73	1257.02	1292.8	-0.300586	0.0060655	0.416207	Mm.206505	NM_011594	ENSMUSG00000017466	D11Bwg1104e|Timp-2	-	11 E2|11 83.09 cM	tissue inhibitor of metalloproteinase 2	protein-coding	no	no	1442.93	yes
Cacnb1	NM_001282977	chr11	98001508	98022627	-	3497	1	Cacnb1||Cacnb1|NM_001282977|	32.64	31.02	23.87	49.5	48.43	0.751138	0.0060727	0.416207	Mm.41252	NM_031173	ENSMUSG00000020882	CAB1|Cchb1|Cchlb1	-	11 D|11 61.5 cM	calcium channel, voltage-dependent, beta 1 subunit	protein-coding	no	no	37.092	yes
Cdkn1a	NM_001111099	chr17	29090979	29100722	+	1938	1	Cdkn1a||Cdkn1a|NM_001111099|	301.04	270.8	373.68	389.99	421.93	0.347566	0.00612418	0.417752	Mm.195663	NM_007669	ENSMUSG00000023067	CAP20|CDKI|CIP1|Cdkn1|P21|SDI1|Waf1|mda6|p21Cip1|p21WAF	-	17 A3.3|17 15.12 cM	cyclin-dependent kinase inhibitor 1A (P21)	protein-coding	no	no	351.488	yes
Eif4a2	NM_001123038	chr16	23107468	23114132	+	3164	1	Eif4a2||Eif4a2|NM_001123038|	760.46	751.57	712.47	544.45	657.58	-0.317091	0.00614712	0.418187	Mm.260084	NM_013506	ENSMUSG00000022884	4833432N07Rik|BM-010|Ddx2b|Eif4|eIF-4A-II|eIF4A-II	-	16 B1|16 13.93 cM	eukaryotic translation initiation factor 4A2	protein-coding	no	no	685.306	yes
Dnmbp	NM_028029	chr19	43846815	43940198	-	6082	1	Dnmbp||Dnmbp|NM_028029|	278.07	256.49	268.1	330.26	339.97	0.313188	0.00619045	0.420002	Mm.159024	NM_028029	ENSMUSG00000025195	2410003L07Rik|2410003M15Rik|TUBA	-	19|19 C3	dynamin binding protein	protein-coding	no	no	294.578	yes
Abl2	NM_009595	chr1	156558787	156649619	+	10691	1	Abl2||Abl2|NM_009595|	785.85	786.16	823.57	993.33	944.46	0.266554	0.00621104	0.420269	Mm.329515	NM_009595	ENSMUSG00000026596	AA536808|Abll|Arg	-	1 G3|1 67.71 cM	v-abl Abelson murine leukemia viral oncogene 2 (arg, Abelson-related gene)	protein-coding	no	no	866.674	yes
Vwa8	NM_027906	chr14	78849178	79202310	+	6839	1	Vwa8||Vwa8|NM_027906|	137.83	114.52	130.38	65.71	108.04	-0.573319	0.00634183	0.426831	Mm.159651	NM_027906	ENSMUSG00000058997	1300010F03Rik|4932416F07Rik|AI957255|Kiaa0564|mKIAA0564	-	14|14 D3	von Willebrand factor A domain containing 8	protein-coding	no	no	111.296	yes
Babam2	NM_144541	chr5	31698050	32084739	+	1276	1	Babam2||Babam2|NM_144541|	84.63	91.86	83.55	55.47	64.27	-0.543818	0.00632498	0.426831	Mm.482126	NM_144541	ENSMUSG00000052139	6030405P19Rik|AI429776|B830038C02Rik|Bre	-	5|5 B1	BRISC and BRCA1 A complex member 2	protein-coding	no	no	75.956	yes
Cd37	NM_001290802	chr7	45233632	45239115	-	1260	1	Cd37||Cd37|NM_001290802|	569.44	633.46	534.35	418.15	504.83	-0.340784	0.00639271	0.427972	Mm.3689	NM_007645	ENSMUSG00000030798	Tspan26	-	7 B3|7 29.2 cM	CD37 antigen	protein-coding	no	no	532.046	yes
2900026A02Rik	NM_001347397	chr5	113086323	113138585	-	6448	1	2900026A02Rik||2900026A02Rik|NM_001347397|	209.16	235.01	188.22	162.14	159.27	-0.397738	0.0065048	0.433302	Mm.160131	NM_172884	ENSMUSG00000051339	8430408O14Rik|A530094D01|AW539426|Gm449|Kiaa1671|mKIAA1671	-	5|5 F	RIKEN cDNA 2900026A02 gene	protein-coding	no	no	190.76	yes
Trmt12	NM_026642	chr15	58872649	58876781	+	4132	1	Trmt12||Trmt12|NM_026642|	50.78	57.26	67.94	109.23	73.58	0.624499	0.00650665	0.433302	Mm.278805	NM_026642	ENSMUSG00000037085	4632406N01Rik|AI449275|Tyw2	-	15|15 D1	tRNA methyltranferase 12	protein-coding	no	no	71.758	yes
Sdc4	NM_011521	chr2	164424247	164443188	-	2451	1	Sdc4||Sdc4|NM_011521|	291.37	325.68	397.55	449.73	412.62	0.335025	0.00659326	0.435621	Mm.3815	NM_011521	ENSMUSG00000017009	AA959608|AW108331|S4|Synd4|ryudocan|syndecan-4	-	2 H3|2 85.16 cM	syndecan 4	protein-coding	no	no	375.39	yes
Mical3	NM_001270475	chr6	120931546	121131022	-	9369	1	Mical3||Mical3|NM_001270475|	135.41	127.65	146.9	256.01	147.16	0.551063	0.00658878	0.435621	Mm.122399	NM_153396	ENSMUSG00000051586	C130040D16Rik|Mical-3|mKIAA1364	-	6|6 F1	microtubule associated monooxygenase, calponin and LIM domain containing 3	protein-coding	no	no	162.626	yes
Tmppe	NM_001200002	chr9	114401095	114411201	+	6853	1	Tmppe||Tmppe|NM_001200002|	278.07	386.52	387.45	581.15	389.33	0.458711	0.00661934	0.436202	Mm.290516	NM_001200002	ENSMUSG00000079260	-	-	9 F3|9	transmembrane protein with metallophosphoesterase domain	protein-coding	no	no	404.504	yes
Spcs3	NM_029701	chr8	54520433	54529998	-	3457	1	Spcs3||Spcs3|NM_029701|	538	584.55	536.19	448.02	464.78	-0.288354	0.00671623	0.440288	Mm.86437	NM_029701	ENSMUSG00000054408	1810011E08Rik|SPC22/23	-	8|8 B1.3	signal peptidase complex subunit 3 homolog (S. cerevisiae)	protein-coding	no	no	514.308	yes
Myh10	NM_175260	chr11	68691915	68816624	+	7702	1	Myh10||Myh10|NM_175260|	91.88	89.47	94.57	127.15	122.02	0.426112	0.00670115	0.440288	Mm.218233	NM_175260	ENSMUSG00000020900	5730504C04Rik|9330167F11Rik|Fltn|Myhn-2|Myhn2|NMHC II-B|NMHC-B|NMHCII-B|NMMHC II-b|NMMHC-B|NMMHC-IIB|SMemb|mKIAA3005	-	11 B3|11 41.95 cM	myosin, heavy polypeptide 10, non-muscle	protein-coding	no	no	105.018	yes
Otud3	NM_028453	chr4	138895379	138913947	-	1655	1	Otud3||Otud3|NM_028453|	27.81	20.28	35.81	49.5	46.57	0.746696	0.00674661	0.441134	Mm.238081	NM_028453	ENSMUSG00000041161	3110030K17Rik	-	4|4 D3	OTU domain containing 3	protein-coding	no	no	35.994	yes
B430306N03Rik	NM_177083	chr17	48316162	48326511	+	3451	1	B430306N03Rik||B430306N03Rik|NM_177083|	198.28	202.8	175.36	286.73	225.4	0.408427	0.00676891	0.441448	Mm.123455	NM_177083	ENSMUSG00000043740	Treml6	-	17|17 C	RIKEN cDNA B430306N03 gene	protein-coding	no	no	217.714	yes
Laptm4b	NM_033521	chr15	34238026	34284295	+	1884	1	Laptm4b||Laptm4b|NM_033521|	129.36	137.19	117.52	94.72	95	-0.437259	0.00686571	0.443139	Mm.197518	NM_033521	ENSMUSG00000022257	C330023P13Rik|LAPTM4beta	-	15|15 B3.1	lysosomal-associated protein transmembrane 4B	protein-coding	no	no	114.758	yes
Casp8ap2	NM_011997	chr4	32615470	32653271	+	6792	1	Casp8ap2||Casp8ap2|NM_011997|	211.57	144.35	176.28	272.23	217.02	0.452998	0.00692172	0.443394	Mm.22279	NM_011997	ENSMUSG00000028282	D4Ertd659e|FLASH	-	4 A5|4 14.27 cM	caspase 8 associated protein 2	protein-coding	no	no	204.29	yes
Cyb561a3	NM_201351	chr19	10577157	10590041	+	3342	1	Cyb561a3||Cyb561a3|NM_201351|	799.15	841.04	774.91	598.21	715.33	-0.307482	0.00701073	0.446828	Mm.252701	NM_201351	ENSMUSG00000034445	2310004G04Rik|Cybasc3|Lcytb	-	19|19 A	cytochrome b561 family, member A3	protein-coding	no	no	745.728	yes
Galnt10	NM_134189	chr11	57645442	57787500	+	4678	1	Galnt10||Galnt10|NM_134189|	545.26	511.78	557.31	385.72	484.34	-0.321894	0.00701014	0.446828	Mm.271670	NM_134189	ENSMUSG00000020520	AU018154|C330012K04Rik|GalNAc-T10|GalNAc-T9|Galnt9|ppGaNTase	-	11|11 B1.3	polypeptide N-acetylgalactosaminyltransferase 10	protein-coding	no	no	496.882	yes
Mtmr12	NM_172958	chr15	12205028	12272240	+	4553	1	Mtmr12||Mtmr12|NM_172958|	239.38	226.66	258	315.75	291.53	0.317744	0.00712066	0.449296	Mm.54460	NM_172958	ENSMUSG00000039458	3Pap|4932703C11|C730015A02Rik|Pip3ap|mKIAA1682	-	15|15 A1	myotubularin related protein 12	protein-coding	no	no	266.264	yes
Stag3	NM_016964	chr5	138280509	138312393	+	4161	1	Stag3||Stag3|NM_016964|	44.73	65.61	51.42	34.13	31.67	-0.716602	0.00710326	0.449296	Mm.285609	NM_016964	ENSMUSG00000036928	SA-2	-	5 G2|5 77.01 cM	stromal antigen 3	protein-coding	no	no	45.512	yes
	NM_001371034	chr17	26941250	26972434	+	5944	1	Syngap1||Syngap1|NM_001371034|	210.37	242.17	261.67	336.23	277.56	0.353408	0.0071106	0.449296									no	no	265.6	yes
Lrrc61	NM_177736	chr6	48554799	48570722	+	2905	1	Lrrc61||Lrrc61|NM_177736|	159.59	176.56	181.79	93.87	152.75	-0.504305	0.00721806	0.453176	Mm.290764	NM_177736	ENSMUSG00000073096	BC027309	-	6|6 B2.3	leucine rich repeat containing 61	protein-coding	no	no	152.912	yes
Smyd2	NM_026796	chr1	189880492	189922291	-	1585	1	Smyd2||Smyd2|NM_026796|	27.81	27.44	33.05	54.62	42.85	0.709414	0.00737207	0.460554	Mm.156895	NM_026796	ENSMUSG00000026603	1110020E07Rik|4930402C15|KMT3C|Zmynd14	-	1|1 H6	SET and MYND domain containing 2	protein-coding	no	no	37.154	yes
Slc26a11	NM_178743	chr11	119355557	119381076	+	2659	1	Slc26a11||Slc26a11|NM_178743|	45.94	44.14	61.52	83.63	70.79	0.587219	0.00744302	0.460831	Mm.31869	NM_178743	ENSMUSG00000039908	F630021I08Rik	-	11|11 E2	solute carrier family 26, member 11	protein-coding	no	no	61.204	yes
Il18bp	NM_001363982	chr7	102015074	102018232	-	1442	1	Il18bp||Il18bp|NM_001363982|	19.34	22.67	29.38	58.88	31.67	0.907287	0.0074244	0.460831	Mm.422756	NM_010531	ENSMUSG00000070427	IL-18BP|Igifbp|MC54L	-	7|7 E2	interleukin 18 binding protein	protein-coding	no	no	32.388	yes
Notch3	NM_008716	chr17	32120820	32166890	-	7989	1	Notch3||Notch3|NM_008716|	18.13	22.67	11.94	23.04	54.95	1.14132	0.00741835	0.460831	Mm.439741	NM_008716	ENSMUSG00000038146	AW229011|N3|hpbk	-	17 B1|17 17.37 cM	notch 3	protein-coding	no	no	26.146	yes
Pik3r6	NR_126154	chr11	68503019	68552695	+	3474	1	Pik3r6||Pik3r6|NR_126154|	245.43	286.31	310.33	360.98	343.69	0.312961	0.00754759	0.463488	Mm.234573	NM_001004435	ENSMUSG00000046207	BB220380|p84|p84 PIKAP|p87(PIKAP)|p87PIKAP	-	11|11 B3	phosphoinositide-3-kinase regulatory subunit 5	protein-coding	no	no	309.348	yes
Fam129a	NM_022018	chr1	151571373	151719347	+	3912	1	Fam129a||Fam129a|NM_022018|	216.41	136	145.98	297.83	199.32	0.570847	0.00766033	0.469269	Mm.157700	NM_022018	ENSMUSG00000026483	AI256368|AU019833|Niban	-	1|1 G1	family with sequence similarity 129, member A	protein-coding	no	no	199.108	yes
Pus1	NM_001025561	chr5	110773667	110780596	-	1855	1	Pus1||Pus1|NM_001025561|	78.58	51.3	62.43	92.16	97.8	0.556751	0.00778617	0.473782	Mm.23528	NM_019700	ENSMUSG00000029507	A730013B20Rik|MPUS1|mPus1p	-	5|5 F	pseudouridine synthase 1	protein-coding	no	no	76.454	yes
Slc20a2	NM_011394	chr8	22476700	22569616	+	3637	1	Slc20a2||Slc20a2|NM_011394|	72.54	87.09	93.65	132.27	105.25	0.477754	0.00775817	0.473782	Mm.323901	NM_011394	ENSMUSG00000037656	MolPit2|Pit-2|Pit2|Ram-1|Ram1	-	8 A2|8 11.42 cM	solute carrier family 20, member 2	protein-coding	no	no	98.16	yes
Ccdc15	NM_001081429	chr9	37267464	37348357	-	11830	1	Ccdc15||Ccdc15|NM_001081429|	112.44	128.84	111.09	66.56	98.73	-0.521618	0.00785778	0.476737	Mm.390150	NM_001081429	ENSMUSG00000034303	A630039F14Rik|D030074L19	-	9|9 A4	coiled-coil domain containing 15	protein-coding	no	no	103.532	yes
Zfp933	NM_001355730	chr4	147822986	147848418	-	4498	1	Zfp933||Zfp933|NM_001355730|	120.9	122.88	125.78	249.18	127.6	0.604459	0.0078846	0.477217	Mm.332053	NM_198619	ENSMUSG00000059423	2810408P10Rik	-	4|4 E1	zinc finger protein 933	protein-coding	no	no	149.268	yes
Plxnb1	NM_172775	chr9	109095436	109119915	+	8525	1	Plxnb1||Plxnb1|NM_172775|	26.6	29.82	35.81	47.79	52.16	0.672772	0.00791484	0.477901	Mm.53862	NM_172775	ENSMUSG00000053646	2900002G15Rik|AU042020|mKIAA0407	-	9|9 F2	plexin B1	protein-coding	no	no	38.436	yes
Thrap3	NM_001356455	chr4	126164083	126202710	-	4392	1	Thrap3||Thrap3|NM_001356455|	452.16	433.05	426.01	570.05	508.55	0.292896	0.00804843	0.48262	Mm.29813	NM_146153	ENSMUSG00000043962	9330151F09Rik|B230333E16Rik|Trap150	-	4|4 D2.2	thyroid hormone receptor associated protein 3	protein-coding	no	no	477.964	yes
Setx	NM_198033	chr2	29124992	29182471	+	10919	1	Setx||Setx|NM_198033|	403.8	419.92	380.11	565.79	452.67	0.334214	0.00805035	0.48262	Mm.41867	NM_198033	ENSMUSG00000043535	A130090N03|A930037J23Rik|AOA2|AW060766|Als4|SCAR1|Sen1|mKIAA0625	-	2|2 B	senataxin	protein-coding	no	no	444.458	yes
AW549877	NM_145930	chr15	3982035	3995746	-	5067	1	AW549877||AW549877|NM_145930|	921.25	909.04	712.47	608.45	714.4	-0.373214	0.00814949	0.487405	Mm.21299	NM_145930	ENSMUSG00000041935	AI195826	-	15|15 A1	expressed sequence AW549877	protein-coding	no	no	773.122	yes
Cep89	NR_153799	chr7	35397063	35439830	+	3901	1	Cep89||Cep89|NR_153799|	29.02	22.67	30.3	43.52	46.57	0.698202	0.00823744	0.488039	Mm.133263	NM_028120	ENSMUSG00000023072	2610507L03Rik|Ccdc123	-	7|7 B2	centrosomal protein 89	protein-coding	no	no	34.416	yes
Mvb12b	NM_175184	chr2	33729956	33887946	-	4976	1	Mvb12b||Mvb12b|NM_175184|	1080.84	1218.02	1087.99	867.03	990.09	-0.295471	0.00822636	0.488039	Mm.254914	NM_175184	ENSMUSG00000038740	2610200O14Rik|2610528K11Rik|AI414895|Fam125b	-	2|2 B	multivesicular body subunit 12B	protein-coding	no	no	1048.79	yes
Dse	NM_172508	chr10	34151389	34207235	-	3902	1	Dse||Dse|NM_172508|	263.56	242.17	236.88	356.71	284.08	0.363976	0.00823062	0.488039	Mm.34557	NM_172508	ENSMUSG00000039497	6030499O08|AI480506|B130024B19Rik|DS-epi1|Sart2	-	10|10 B1	dermatan sulfate epimerase	protein-coding	no	no	276.68	yes
Tet3	NM_001347313	chr6	83362374	83456392	-	11589	1	Tet3||Tet3|NM_001347313|	1506.41	1531.77	1508.5	2001.16	1717.53	0.282404	0.00836388	0.493363	Mm.211030	NM_183138	ENSMUSG00000034832	B430006D22Rik|BC037432|D230004J03Rik	-	6|6 C3	tet methylcytosine dioxygenase 3	protein-coding	no	no	1653.07	yes
Bahd1	NM_001045523	chr2	118901615	118924524	+	4415	1	Bahd1||Bahd1|NM_001045523|	342.15	318.52	356.24	453.99	390.26	0.304682	0.00856191	0.501378	Mm.330487	NM_001045523	ENSMUSG00000040007	AL022997|AW541238|Gm117|mKIAA0945	-	2|2 E5	bromo adjacent homology domain containing 1	protein-coding	no	no	372.232	yes
Arid3a	NM_001288626	chr10	79927043	79955018	+	5338	1	Arid3a||Arid3a|NM_001288626|	652.86	728.9	740.02	814.12	909.06	0.27129	0.00854852	0.501378	Mm.301282	NM_007880	ENSMUSG00000019564	Bright|Dri1|Dril1	-	10|10 C1	AT rich interactive domain 3A (BRIGHT-like)	protein-coding	no	no	768.992	yes
Htra1	NM_019564	chr7	130936203	130985658	+	2022	1	Htra1||Htra1|NM_019564|	10.88	20.28	24.79	32.43	37.26	0.857626	0.00862066	0.501529	Mm.30156	NM_019564	ENSMUSG00000006205	AI429470|HTRA|L56|Prss11|RSPP11	-	7|7 F3	HtrA serine peptidase 1	protein-coding	no	no	25.128	yes
Syne2	NM_001005510	chr12	75818318	76110928	+	21487	1	Syne2||Syne2|NM_001005510|	21.76	22.67	31.22	50.35	37.26	0.769997	0.00861965	0.501529	Mm.26652	NM_001005510	ENSMUSG00000063450	6820443O06Rik|AW546258|Cpfl8|D12Ertd777e|KASH2|NUA|Nesp2g|dice|mKIAA1011	-	12 C3|12 33.11 cM	spectrin repeat containing, nuclear envelope 2	protein-coding	no	no	32.652	yes
Jam2	NM_023844	chr16	84774123	84826375	+	4798	1	Jam2||Jam2|NM_023844|	529.54	575.01	471	388.28	452.67	-0.333482	0.00884324	0.510743	Mm.41758	NM_023844	ENSMUSG00000053062	1110002N23Rik|2410030G21Rik|2410167M24Rik|JAM-2|JAM-B|Jcam2|VE-JAM	-	16|16 C3.3	junction adhesion molecule 2	protein-coding	no	no	483.3	yes
Notch1	NM_008714	chr2	26457902	26503822	-	9422	1	Notch1||Notch1|NM_008714|	859.6	732.48	854.78	1062.45	951.91	0.291592	0.00884158	0.510743	Mm.290610	NM_008714	ENSMUSG00000026923	9930111A19Rik|Mis6|N1|Tan1|lin-12	-	2 A3|2 18.91 cM	notch 1	protein-coding	no	no	892.244	yes
Brd1	NM_001033274	chr15	88687035	88734219	-	5112	1	Brd1||Brd1|NM_001033274|	628.68	557.11	605.05	785.96	687.38	0.291446	0.00888797	0.511921	Mm.254438	NM_001033274	ENSMUSG00000022387	1110059H06Rik|AI316859|mKIAA4191	-	15|15 E3	bromodomain containing 1	protein-coding	no	no	652.836	yes
Ankra2	NM_001271388	chr13	98263076	98273918	+	2431	1	Ankra2||Ankra2|NM_001271388|	78.58	108.56	105.59	67.42	70.79	-0.513347	0.00890421	0.511921	Mm.209642	NM_023472	ENSMUSG00000021661	1110004M18Rik|Ankra	-	13|13 D1	ankyrin repeat, family A (RFXANK-like), 2	protein-coding	no	no	86.188	yes
Cdh24	NM_199470	chr14	54631992	54641364	-	2705	1	Cdh24||Cdh24|NM_199470|	9.67	19.09	24.79	52.06	24.22	1.06711	0.00895067	0.513423	Mm.386871	NM_199470	ENSMUSG00000059674	1700040A22Rik	-	14|14 C2	cadherin-like 24	protein-coding	no	no	25.966	yes
Dazap1	NM_001122605	chr10	80264991	80288413	+	2059	1	Dazap1||Dazap1|NM_001122605|	256.31	273.19	289.21	358.42	320.41	0.302188	0.00904369	0.517582	Mm.148693	NM_133188	ENSMUSG00000069565	2410042M16Rik|mPrrp	-	10|10 C1	DAZ associated protein 1	protein-coding	no	no	299.508	yes
Wdr24	NM_173741	chr17	25823627	25828730	+	3082	1	Wdr24||Wdr24|NM_173741|	176.51	171.79	197.4	133.98	151.82	-0.365797	0.00910919	0.518326	Mm.95512	NM_173741	ENSMUSG00000025737	BC037651	-	17|17 A3.3	WD repeat domain 24	protein-coding	no	no	166.3	yes
Iqgap1	NM_016721	chr7	80711583	80803331	-	7284	1	Iqgap1||Iqgap1|NM_016721|	96.72	126.45	103.75	186.89	124.81	0.510478	0.0091183	0.518326	Mm.207619	NM_016721	ENSMUSG00000030536	AA682088|D7Ertd237e|D7Ertd257e|mKIAA0051	-	7 D3|7 45.68 cM	IQ motif containing GTPase activating protein 1	protein-coding	no	no	127.724	yes
Map3k8	NM_007746	chr18	4331327	4352953	-	2492	1	Map3k8||Map3k8|NM_007746|	314.34	249.33	314.92	377.19	362.32	0.322253	0.00924683	0.523895	Mm.3275	NM_007746	ENSMUSG00000024235	Cot|Cot/Tpl2|Est|Estf|Tpl-2|Tpl2|c-COT	-	18 A1|18 2.73 cM	mitogen-activated protein kinase kinase kinase 8	protein-coding	no	no	323.62	yes
Arhgap32	NM_001195632	chr9	32115988	32264765	+	9992	1	Arhgap32||Arhgap32|NM_001195632|	224.87	250.52	240.55	307.21	287.81	0.307628	0.00932985	0.525616	Mm.46683	NM_177379	ENSMUSG00000041444	3426406O18Rik|Gc-gap|Grit|Px-rics|Rics|mKIAA0712|p200Rhogap|p250Gap	-	9|9 A4	Rho GTPase activating protein 32	protein-coding	no	no	262.192	yes
Atat1	NM_001142745	chr17	35899832	35910068	-	2021	1	Atat1||Atat1|NM_001142745|	118.48	159.86	146.9	93.87	115.5	-0.45286	0.00931388	0.525616	Mm.273155	NM_028476	ENSMUSG00000024426	0610011P08Rik|2610008K08Rik|2610110G12Rik|3110080J08Rik|Mec17|TAT	-	17|17 B1	alpha tubulin acetyltransferase 1	protein-coding	no	no	126.922	yes
Paqr8	NM_001355122	chr1	20917840	20939650	+	5294	1	Paqr8||Paqr8|NM_001355122|	33.85	21.47	29.38	51.2	42.85	0.723813	0.0094023	0.528409	Mm.40780	NM_028829	ENSMUSG00000025931	1700019B16Rik|3110001D06Rik	-	1|1 A4	progestin and adipoQ receptor family member VIII	protein-coding	no	no	35.75	yes
Arl6ip1	NM_019419	chr7	118118890	118129625	-	2124	1	Arl6ip1||Arl6ip1|NM_019419|	640.77	684.76	636.27	505.2	578.41	-0.284507	0.00946317	0.528409	Mm.29924	NM_019419	ENSMUSG00000030654	AIP-6|AL022945|ARMER|AU042858|Aip-1|Arl6ip|C85138|mKIAA0069	-	7|7 F1	ADP-ribosylation factor-like 6 interacting protein 1	protein-coding	no	no	609.082	yes
Srd5a3	NM_020611	chr5	76140273	76155503	+	1758	1	Srd5a3||Srd5a3|NM_020611|	228.5	233.82	257.08	180.06	204.91	-0.333612	0.00958951	0.52965	Mm.289446	NM_020611	ENSMUSG00000029233	1110025P14Rik|A430076C09|AV364670|AW987574|D730040M03Rik|H5ar|S5AR 3|Srd5a2l	-	5|5 C3.3	steroid 5 alpha-reductase 3	protein-coding	no	no	220.874	yes
Lrrc4	NM_138682	chr6	28828126	28831747	-	3621	1	Lrrc4||Lrrc4|NM_138682|	41.11	59.65	48.66	27.31	33.53	-0.722253	0.00956694	0.52965	Mm.443660	NM_138682	ENSMUSG00000049939	MBAG1|NGL-2|NGL2|NLG-2|Nag14	-	6|6 A3.3	leucine rich repeat containing 4	protein-coding	no	no	42.052	yes
Tsg101	NM_021884	chr7	46888950	46919969	-	1929	1	Tsg101||Tsg101|NM_021884|	129.36	144.35	147.82	101.55	114.56	-0.394752	0.00959032	0.52965	Mm.241334	NM_021884	ENSMUSG00000014402	AI255943|CC2	-	7|7 B3	tumor susceptibility gene 101	protein-coding	no	no	127.528	yes
Gm3704	NR_131166	chr5	151406504	151432118	+	2303	1	Gm3704||Gm3704|NR_131166|	48.36	84.7	56.01	17.07	47.5	-0.983396	0.00981285	0.536116	Mm.443286	NR_131166	ENSMUSG00000097321	-	-	5 G3|5	predicted gene 3704	ncRNA	no	no	50.728	yes
Akt3	NM_011785	chr1	177020076	177248767	-	6749	1	Akt3||Akt3|NM_011785|	186.19	168.21	173.53	262.84	201.19	0.390839	0.00981361	0.536116	Mm.235194	NM_011785	ENSMUSG00000019699	AI851531|D930002M15Rik|Nmf350	-	1|1 H4	thymoma viral proto-oncogene 3	protein-coding	no	no	198.392	yes
Pwwp2b	NM_001098636	chr7	139248482	139267253	+	2635	1	Pwwp2b||Pwwp2b|NM_001098636|	94.3	64.42	105.59	114.35	139.71	0.504023	0.00981018	0.536116	Mm.334300	NM_001033206	ENSMUSG00000060260	AI594893|D7Ertd517e|D930023J19Rik|Pwwp2	-	7 F4|7 84.39 cM	PWWP domain containing 2B	protein-coding	no	no	103.674	yes
Snx12	NM_001110310	chrX	101211961	101222563	-	2420	1	Snx12||Snx12|NM_001110310|	200.69	190.87	233.21	147.63	177.9	-0.37481	0.00979814	0.536116	Mm.206949	NM_018875	ENSMUSG00000046032	2610001F05Rik|AW045757|SDP8	-	X|X D	sorting nexin 12	protein-coding	no	no	190.06	yes
Cd163	NM_001170395	chr6	124304651	124330527	+	4459	1	Cd163||Cd163|NM_001170395|	25.39	45.33	37.64	55.47	60.54	0.666644	0.00986304	0.537653	Mm.37426	NM_053094	ENSMUSG00000008845	CD163v2|CD163v3	-	6|6 F2	CD163 antigen	protein-coding	no	no	44.874	yes
Snapc3	NR_152449	chr4	83417724	83469180	+	4351	1	Snapc3||Snapc3|NR_152449|	94.3	106.17	96.4	147.63	121.08	0.435343	0.00993329	0.53812	Mm.271985	NM_029949	ENSMUSG00000028483	1810020H02Rik|4930558A07Rik|5031401C21Rik|AI414457|E030018J20Rik	-	4|4 C3	small nuclear RNA activating complex, polypeptide 3	protein-coding	no	no	113.116	yes
Akirin2	NM_001007589	chr4	34550615	34566908	+	1710	1	Akirin2||Akirin2|NM_001007589|	467.88	441.4	444.38	352.44	393.99	-0.286647	0.00999819	0.53812	Mm.389532	NM_026019	ENSMUSG00000028291	2700059D21Rik|AA114675|AA522011|AU019887|Akirin-2	-	4|4 A5	akirin 2	protein-coding	no	no	420.018	yes
Drg1	NM_007879	chr11	3249907	3266463	-	1599	1	Drg1||Drg1|NM_007879|	157.17	156.28	158.84	121.18	125.74	-0.361887	0.00996599	0.53812	Mm.3250	NM_007879	ENSMUSG00000020457	AA408859|AI132520|DRG-1|NEDD-3|Nedd3	-	11|11 A1	developmentally regulated GTP binding protein 1	protein-coding	no	no	143.842	yes
Zfp516	NM_183033	chr18	82910879	83005314	+	7714	1	Zfp516||Zfp516|NM_183033|	475.14	436.63	449.89	588.83	525.32	0.284615	0.00995915	0.53812	Mm.326526	NM_183033	ENSMUSG00000058881	C330029B10Rik|D230016L03|Zfp26l|Znf516|mKIAA0222	-	18|18 E3	zinc finger protein 516	protein-coding	no	no	495.162	yes
Tiparp	NM_178892	chr3	65528447	65555518	+	4143	1	Tiparp||Tiparp|NM_178892|	301.04	237.4	279.11	329.4	362.32	0.329955	0.0100384	0.53812	Mm.246398	NM_178892	ENSMUSG00000034640	ARTD14|AW558171|PARP7	-	3|3 E1	TCDD-inducible poly(ADP-ribose) polymerase	protein-coding	no	no	301.854	yes
Eid1	NM_025613	chr2	125673100	125675642	+	2542	1	Eid1||Eid1|NM_025613|	153.54	188.49	185.46	135.69	138.78	-0.371423	0.0100938	0.538597	Mm.425101	NM_025613	ENSMUSG00000091337	2610002K20Rik|Cri1|EID-1|ORF12|PNAS-22|PTD014	-	2|2 F1	EP300 interacting inhibitor of differentiation 1	protein-coding	no	no	160.392	yes
Dennd6b	NM_027081	chr15	89182213	89196474	-	4572	1	Dennd6b||Dennd6b|NM_027081|	88.26	126.45	126.7	162.14	146.23	0.422217	0.0101691	0.540333	Mm.482128	NM_027081	ENSMUSG00000015377	1700027J05Rik|AI414881|Fam116b	-	15|15 E3	DENN/MADD domain containing 6B	protein-coding	no	no	129.956	yes
Tceanc	NM_001007577	chrX	166499815	166510478	-	4038	1	Tceanc||Tceanc|NM_001007577|	95.51	116.91	100.99	59.74	86.62	-0.52854	0.0101942	0.54053	Mm.336318	NM_001007577	ENSMUSG00000051224	A630018P17Rik|Gm390	-	X|X F5	transcription elongation factor A (SII) N-terminal and central domain containing	protein-coding	no	no	91.954	yes
Vps25	NM_001284412	chr11	101253707	101259551	+	1237	1	Vps25||Vps25|NM_001284412|	166.84	192.07	188.22	136.54	150.89	-0.357754	0.0102654	0.543162	Mm.301020	NM_026776	ENSMUSG00000078656	1110020N13Rik|AW107467|D11Wsu68e	-	11 D|11 64.48 cM	vacuolar protein sorting 25	protein-coding	no	no	166.912	yes
Cbarp	NR_036582	chr10	80130434	80139367	-	3273	1	Cbarp||Cbarp|NR_036582|	50.78	38.17	45.91	82.78	57.75	0.636319	0.0103196	0.544889	Mm.485395	NM_015761	ENSMUSG00000035640	9630008F14|Dos|R29144/1	-	10|10 C1	calcium channel, voltage-dependent, beta subunit associated regulatory protein	protein-coding	no	no	55.078	yes
Pdk1	NM_172665	chr2	71873224	71903858	+	5164	1	Pdk1||Pdk1|NM_172665|	687.92	711.01	732.67	458.26	664.1	-0.355508	0.0103746	0.545747	Mm.34411	NM_172665	ENSMUSG00000006494	B830012B01|D530020C15Rik	-	2|2 C3	pyruvate dehydrogenase kinase, isoenzyme 1	protein-coding	no	no	650.792	yes
Ptch1	NM_008957	chr13	63508328	63565735	-	7259	1	Ptch1||Ptch1|NM_008957|	142.66	136	161.59	191.16	186.28	0.345854	0.0104642	0.546805	Mm.228798	NM_008957	ENSMUSG00000021466	A230106A15Rik|Ptc|Ptc1|Ptch|mes|wig	-	13 B3|13 32.8 cM	patched 1	protein-coding	no	no	163.538	yes
Dph5	NM_027193	chr3	115888183	115929323	+	1552	1	Dph5||Dph5|NM_027193|	24.18	29.82	44.99	58.03	51.23	0.691763	0.0105821	0.5494	Mm.5915	NM_027193	ENSMUSG00000033554	2410012M04Rik|AU045680|C80186	-	3|3 G1	diphthamide biosynthesis 5	protein-coding	no	no	41.65	yes
Usp49	NM_198421	chr17	47630690	47686739	+	8240	1	Usp49||Usp49|NM_198421|	120.9	174.17	157	199.69	197.46	0.385129	0.0105826	0.5494	Mm.59393	NM_198421	ENSMUSG00000090115	C330046L10Rik|Gm545	-	17|17 C	ubiquitin specific peptidase 49	protein-coding	no	no	169.844	yes
Gmeb2	NM_198169	chr2	181251451	181287966	-	4031	1	Gmeb2||Gmeb2|NM_198169|	221.25	202.8	284.62	290.15	319.48	0.348195	0.010601	0.5494	Mm.220423	NM_198169	ENSMUSG00000038705	AI839884	-	2|2 H4	glucocorticoid modulatory element binding protein 2	protein-coding	no	no	263.66	yes
Sacs	NM_015788	chr14	61138457	61215499	+	15749	1	Sacs||Sacs|NM_015788|	36.27	33.4	35.81	56.32	52.16	0.614195	0.010774	0.552397	Mm.440703	NM_015788	ENSMUSG00000048279	A230052M14|DNAJC29|E130115J16Rik	-	14 D1|14 32.13 cM	sacsin	protein-coding	no	no	42.792	yes
Helz2	NM_183162	chr2	181227615	181242027	-	10072	1	Helz2||Helz2|NM_183162|	79.79	72.77	61.52	139.95	81.03	0.628177	0.0106912	0.552397	Mm.315872	NM_183162	ENSMUSG00000027580	PDIP1|Pric285|mKIAA1769|mPDIP1	-	2|2 H4	helicase with zinc finger 2, transcriptional coactivator	protein-coding	no	no	87.012	yes
Wdr3	NM_001355657	chr3	100138180	100162407	-	3324	1	Wdr3||Wdr3|NM_001355657|	142.66	132.42	165.26	194.57	184.42	0.35058	0.0107901	0.552397	Mm.24591	NM_175552	ENSMUSG00000033285	AW546279|D030020G18Rik	-	3|3 F2.2	WD repeat domain 3	protein-coding	no	no	163.866	yes
Agmo	NM_178767	chr12	37241639	37581932	+	2130	1	Agmo||Agmo|NM_178767|	223.66	211.15	204.74	163.85	175.11	-0.340764	0.0109516	0.558398	Mm.485540	NM_178767	ENSMUSG00000050103	A530016O06Rik|AI790538|Tmem195	-	12|12 A3	alkylglycerol monooxygenase	protein-coding	no	no	195.702	yes
Nxpe3	NM_001134457	chr16	55839953	55895279	-	6419	1	Nxpe3||Nxpe3|NM_001134457|	30.22	35.79	39.48	53.76	55.88	0.617644	0.0110177	0.559509	Mm.310635	NM_001134457	ENSMUSG00000075033	Fam55c|Gm1752|Gm611	-	16|16 C1.1	neurexophilin and PC-esterase domain family, member 3	protein-coding	no	no	43.026	yes
Ttc8	NM_001364378	chr12	98920574	98983238	+	2244	1	Ttc8||Ttc8|NM_001364378|	38.69	41.75	53.25	67.42	67.06	0.566391	0.0110821	0.56165	Mm.282660	NM_029553	ENSMUSG00000021013	0610012F22Rik|AV001447|BBS8	-	12|12 E	tetratricopeptide repeat domain 8	protein-coding	no	no	53.634	yes
Specc1l	NM_153406	chr10	75212073	75312400	+	6031	1	Specc1l||Specc1l|NM_153406|	383.25	332.84	370.93	538.48	394.92	0.354281	0.0114563	0.579449	Mm.27716	NM_153406	ENSMUSG00000033444	4930470P14Rik|4932439K10Rik|9530057A13Rik|AI317249|Cytsa|mKIAA0376	-	10|10 C1	sperm antigen with calponin homology and coiled-coil domains 1-like	protein-coding	no	no	404.084	yes
Zscan18	NM_001017955	chr7	12768092	12775658	-	3615	1	Zscan18||Zscan18|NM_001017955|	151.12	121.68	126.7	197.13	159.27	0.413809	0.0115025	0.580623	Mm.333573	NM_001017955	ENSMUSG00000070822	EG232875	-	7 A1|7	zinc finger and SCAN domain containing 18	protein-coding	no	no	151.18	yes
Rfc3	NM_027009	chr5	151642824	151651208	-	1198	1	Rfc3||Rfc3|NM_027009|	27.81	28.63	43.15	19.63	17.7	-0.854587	0.0116554	0.583698	Mm.12553	NM_027009	ENSMUSG00000033970	2810416I22Rik|38kDa|AU022547|Recc3	-	5|5 G3	replication factor C (activator 1) 3	protein-coding	no	no	27.384	yes
Vps72	NM_009336	chr3	95111042	95123051	+	1425	1	Vps72||Vps72|NM_009336|	168.05	171.79	207.5	134.83	151.82	-0.367992	0.0116559	0.583698	Mm.133919	NM_009336	ENSMUSG00000008958	Tcfl1|YL-1	-	3|3 F2.1	vacuolar protein sorting 72	protein-coding	no	no	166.798	yes
Zfp609	NM_172536	chr9	65691583	65827564	-	8566	1	Zfp609||Zfp609|NM_172536|	505.36	521.33	516.91	654.54	590.52	0.263747	0.0116195	0.583698	Mm.139231	NM_172536	ENSMUSG00000040524	9830165N24|BC016271|Znf609|mKIAA0295	-	9|9 C	zinc finger protein 609	protein-coding	no	no	557.732	yes
Rcan1	NM_019466	chr16	92391951	92400078	-	2188	1	Rcan1||Rcan1|NM_019466|	407.43	349.54	622.5	256.87	385.61	-0.529438	0.0116552	0.583698	Mm.265744	NM_019466	ENSMUSG00000022951	Adapt78|CALP1L|CSP1|DSC1|Dscr1|MCIP1|RCN1	-	16 C4|16 53.6 cM	regulator of calcineurin 1	protein-coding	no	no	404.39	yes
Igsf6	NM_030691	chr7	121064067	121074530	-	2122	1	Igsf6||Igsf6|NM_030691|	201.9	190.87	206.58	302.95	220.75	0.380532	0.0116984	0.584666	Mm.160384	NM_030691	ENSMUSG00000035004	-	-	7|7 F2	immunoglobulin superfamily, member 6	protein-coding	no	no	224.61	yes
Dglucy	NM_001361017	chr12	100779057	100872610	+	3432	1	Dglucy||Dglucy|NM_001361017|	197.07	213.54	241.47	104.11	199.32	-0.536999	0.011874	0.587625	Mm.218590	NM_145448	ENSMUSG00000021185	9030617O03Rik	-	12|12 E	D-glutamate cyclase	protein-coding	no	no	191.102	yes
Tia1	NM_001164078	chr6	86404219	86433405	+	4427	1	Tia1||Tia1|NM_001164078|	368.74	502.24	401.22	333.67	340.9	-0.341341	0.0118195	0.587625	Mm.333219	NM_011585	ENSMUSG00000071337	2310050N03Rik|AI256674|TIA-1|mTIA-1	-	6|6 D1	cytotoxic granule-associated RNA binding protein 1	protein-coding	no	no	389.354	yes
Deaf1	NM_001282072	chr7	141297176	141327725	-	2337	1	Deaf1||Deaf1|NM_001282072|	71.33	84.7	86.3	126.3	98.73	0.46644	0.0118526	0.587625	Mm.28392	NM_016874	ENSMUSG00000058886	AU042387|C230009B13Rik|NUDR	-	7|7 F5	DEAF1, transcription factor	protein-coding	no	no	93.472	yes
Tmco1	NM_001039483	chr1	167308670	167333978	+	4461	1	Tmco1||Tmco1|NM_001039483|	192.23	235.01	224.94	171.53	175.11	-0.339589	0.0119031	0.587867	Mm.330045	NM_026881	ENSMUSG00000052428	1190006A08Rik|4930403O06Rik|AA109065|AU022572|ESTM39	-	1|1 H2.3	transmembrane and coiled-coil domains 1	protein-coding	no	no	199.764	yes
Slc13a3	NM_054055	chr2	165405295	165473197	-	3199	1	Slc13a3||Slc13a3|NM_054055|	159.59	130.03	179.95	232.97	184.42	0.399952	0.0119258	0.587867	Mm.250738	NM_054055	ENSMUSG00000018459	NaDC-3|NaDC3|SDCT2	-	2|2 H3	solute carrier family 13 (sodium-dependent dicarboxylate transporter), member 3	protein-coding	no	no	177.392	yes
Kdm6b	NM_001017426	chr11	69398518	69416194	-	6773	1	Kdm6b||Kdm6b|NM_001017426|	1662.37	1438.72	1823.42	1921.8	2111.52	0.284064	0.0119488	0.587867	Mm.261201	NM_001017426	ENSMUSG00000018476	1700064E03Rik|BC038313|Jmjd3	-	11|11 B3	KDM1 lysine (K)-specific demethylase 6B	protein-coding	no	no	1791.57	yes
Dad1	NM_001113358	chr14	54235485	54253929	-	692	1	Dad1||Dad1|NM_001113358|	147.5	151.51	159.76	120.33	120.15	-0.35983	0.0119803	0.588269	Mm.319038	NM_010015	ENSMUSG00000022174	AI323713	-	14 C2|14 27.7 cM	defender against cell death 1	protein-coding	no	no	139.85	yes
Dock6	NM_177030	chr9	21800180	21852635	-	6461	1	Dock6||Dock6|NM_177030|	96.72	108.56	109.26	192.86	111.77	0.530465	0.0121385	0.593729	Mm.128153	NM_177030	ENSMUSG00000032198	2410095B20Rik|4931431C02Rik|C330023D02Rik|mKIAA1395	-	9|9 A3	dedicator of cytokinesis 6	protein-coding	no	no	123.834	yes
Ehbp1l1	NM_001114597	chr19	5707374	5726317	-	6369	1	Ehbp1l1||Ehbp1l1|NM_001114597|	580.32	479.57	593.12	739.87	631.5	0.302844	0.0121249	0.593729	Mm.210447	NM_053252	ENSMUSG00000024937	G430002G23Rik	-	19|19 A	EH domain binding protein 1-like 1	protein-coding	no	no	604.876	yes
Amz1	NM_173405	chr5	140724127	140753312	+	2670	1	Amz1||Amz1|NM_173405|	478.76	492.69	525.17	638.32	568.16	0.261964	0.0124424	0.595947	Mm.491298	NM_173405	ENSMUSG00000050022	5330426I05|6530401C20Rik	-	5|5 G2	archaelysin family metallopeptidase 1	protein-coding	no	no	540.62	yes
Agfg2	NM_001303266	chr5	137650481	137684753	-	2910	1	Agfg2||Agfg2|NM_001303266|	62.87	76.35	102.83	121.18	108.04	0.481432	0.0123956	0.595947	Mm.260869	NM_145566	ENSMUSG00000029722	A630095P14Rik|Hrbl|RAB-R|RABR	-	5|5 G2	ArfGAP with FG repeats 2	protein-coding	no	no	94.254	yes
Uhrf1bp1	NM_001080769	chr17	27856507	27900040	+	8526	1	Uhrf1bp1||Uhrf1bp1|NM_001080769|	806.4	737.25	740.02	916.52	925.83	0.262401	0.0123074	0.595947	Mm.291291	NM_001080769	ENSMUSG00000039512	1110020K19Rik|AA408674|F830021D11Rik|mKIAA4127	-	17|17 A3.3	UHRF1 (ICBP90) binding protein 1	protein-coding	no	no	825.204	yes
Arhgdib	NM_001301301	chr6	136923661	136941899	-	1157	1	Arhgdib||Arhgdib|NM_001301301|	398.97	403.22	358.99	294.41	336.24	-0.307346	0.0125053	0.595947	Mm.2241	NM_007486	ENSMUSG00000030220	D4|Gdid4|Ly-GDI	-	6|6 G1	Rho, GDP dissociation inhibitor (GDI) beta	protein-coding	no	no	358.366	yes
Lamp2	NM_010685	chrX	38419503	38456460	-	3597	1	Lamp2||Lamp2|NM_010685|	1299.67	1268.12	1110.03	954.92	1060.88	-0.297212	0.0124777	0.595947	Mm.486	NM_010685	ENSMUSG00000016534	CD107b|LGP-B|Lamp II|Lamp-2|Lamp-2a|Lamp-2b|Lamp-2c|Mac3	-	X A3.3|X 22.67 cM	lysosomal-associated membrane protein 2	protein-coding	no	no	1138.72	yes
Slc38a9	NM_178746	chr13	112660766	112738752	+	8884	1	Slc38a9||Slc38a9|NM_178746|	369.95	570.24	468.25	702.33	543.02	0.397201	0.01243	0.595947	Mm.40834	NM_175376	ENSMUSG00000047789	4833412L08Rik|6720411P22Rik|9130023D20Rik|9430067K09Rik|A730092C09	-	13|13 D2.2	solute carrier family 38, member 9	protein-coding	no	no	530.758	yes
Fbxo46	NM_175530	chr7	19119859	19138261	+	2959	1	Fbxo46||Fbxo46|NM_175530|	151.12	106.17	157	175.79	194.67	0.404519	0.0125235	0.595947	Mm.230830	NM_175530	ENSMUSG00000050428	20D7-FC4|4932704E22Rik|Fbxo34l	-	7|7 A3	F-box protein 46	protein-coding	no	no	156.95	yes
	NM_001373894	chr3	38449259	38484850	-	8487	1	Ankrd50||Ankrd50|NM_001373894|	340.94	274.38	292.89	381.46	377.22	0.314402	0.0122347	0.595947									no	no	333.378	yes
Foxo4	NM_018789	chrX	101254528	101260873	+	3157	1	Foxo4||Foxo4|NM_018789|	232.13	248.14	238.72	333.67	271.04	0.326413	0.012404	0.595947	Mm.240299	NM_018789	ENSMUSG00000042903	Afxh|Mllt7|afx	-	X D|X 43.89 cM	forkhead box O4	protein-coding	no	no	264.74	yes
Epha2	NM_010139	chr4	141301221	141329384	+	3899	1	Epha2||Epha2|NM_010139|	574.27	523.71	555.47	642.59	690.18	0.260756	0.0125348	0.595947	Mm.2581	NM_010139	ENSMUSG00000006445	AW545284|Eck|Myk2|Sek-2|Sek2	-	4 D3|4 73.67 cM	Eph receptor A2	protein-coding	no	no	597.244	yes
Crocc	NM_001145958	chr4	141016637	141060545	-	6197	1	Crocc||Crocc|NM_001145958|	58.03	45.33	46.82	75.95	71.72	0.555876	0.0125617	0.595947	Mm.80685	NM_172122	ENSMUSG00000040860	-	-	4|4 D3	ciliary rootlet coiled-coil, rootletin	protein-coding	no	no	59.57	yes
Maff	NM_010755	chr15	79347520	79359076	+	1953	1	Maff||Maff|NM_010755|	124.53	62.03	99.16	135.69	146.23	0.550322	0.0123168	0.595947	Mm.86646	NM_010755	ENSMUSG00000042622	-	-	15 E1|15 37.7 cM	v-maf musculoaponeurotic fibrosarcoma oncogene family, protein F (avian)	protein-coding	no	no	113.528	yes
Tmbim1	NM_027154	chr1	74288247	74304336	-	2286	1	Tmbim1||Tmbim1|NM_027154|	159.59	184.91	193.73	215.05	239.37	0.323737	0.0127392	0.603234	Mm.261182	NM_027154	ENSMUSG00000006301	2310061B02Rik|AA960455|AU024746|C78899|RECS1|Tmbib1|mKIAA4161	-	1|1 C3	transmembrane BAX inhibitor motif containing 1	protein-coding	no	no	198.53	yes
Hist1h2bc	NM_023422	chr13	23684199	23692480	+	725	1	H2bc4||H2bc4|NM_023422|	58.03	90.67	78.96	49.5	53.09	-0.57795	0.0129218	0.607604	Mm.261676	NM_023422	ENSMUSG00000018102	2610022J01Rik|H2bfs|R74621	-	13|13 A3.1	histone cluster 1, H2bc	protein-coding	no	no	66.05	yes
Sash1	NM_175155	chr10	8722219	8886070	-	7144	1	Sash1||Sash1|NM_175155|	41.11	44.14	68.86	79.36	76.38	0.567994	0.0128572	0.607604	Mm.338275	NM_175155	ENSMUSG00000015305	1100001C18Rik|2500002E12Rik|A330076K04Rik|mKIAA0790	-	10|10 A1	SAM and SH3 domain containing 1	protein-coding	no	no	61.97	yes
Golt1b	NM_025872	chr6	142387243	142403858	+	2787	1	Golt1b||Golt1b|NM_025872|	230.92	221.89	231.37	192.01	176.97	-0.315801	0.013024	0.607604	Mm.3676	NM_025872	ENSMUSG00000030245	2310061A22Rik|AA407874|AU024291|CGI-141	-	6|6 G2	golgi transport 1B	protein-coding	no	no	210.632	yes
Ap5m1	NM_001360070	chr14	49066549	49090740	+	3881	1	Ap5m1||Ap5m1|NM_001360070|	171.68	186.1	191.89	152.75	138.78	-0.341245	0.0129907	0.607604	Mm.379235	NM_144535	ENSMUSG00000036291	4932432K03Rik|Mu5|Mudeng	-	14|14 C1	adaptor-related protein complex 5, mu 1 subunit	protein-coding	no	no	168.24	yes
Yeats2	NM_001145930	chr16	20141063	20232573	+	6055	1	Yeats2||Yeats2|NM_001145930|	229.71	229.05	235.96	282.47	287.81	0.288032	0.012887	0.607604	Mm.390895	NM_001033237	ENSMUSG00000041215	BC042768|mKIAA1197	-	16|16 A3	YEATS domain containing 2	protein-coding	no	no	253	yes
Ccnd3	NM_007632	chr17	47593467	47599688	+	1970	1	Ccnd3||Ccnd3|NM_007632|	149.92	165.82	176.28	216.76	198.39	0.325867	0.0130501	0.607697	Mm.27291	NM_007632	ENSMUSG00000034165	9230106B05Rik|AA682053|AL024085|AW146355|C78795	-	17 C|17 23.37 cM	cyclin D3	protein-coding	no	no	181.434	yes
Plxdc1	NM_001163608	chr11	97923237	97986446	-	2878	1	Plxdc1||Plxdc1|NM_001163608|	464.25	516.55	526.09	363.54	461.05	-0.29983	0.0134622	0.624582	Mm.39617	NM_028199	ENSMUSG00000017417	2410003I07Rik|AI848450|Tem7	-	11|11 D	plexin domain containing 1	protein-coding	no	no	466.296	yes
Eml5	NM_001081191	chr12	98786604	98901484	-	10049	1	Eml5||Eml5|NM_001081191|	10.88	19.09	25.71	38.4	29.81	0.837951	0.0135127	0.624629	Mm.390484	NM_001081191	ENSMUSG00000051166	BC027154|C130068M19Rik	-	12|12 E	echinoderm microtubule associated protein like 5	protein-coding	no	no	24.778	yes
Cfh	NM_009888	chr1	140085855	140183411	-	4322	1	Cfh||Cfh|NM_009888|	1176.35	1172.69	1026.47	813.26	1014.31	-0.31544	0.0135016	0.624629	Mm.8655	NM_009888	ENSMUSG00000026365	Mud-1|NOM|Sas-1|Sas1	-	1 61.62 cM|1 F	complement component factor h	protein-coding	no	no	1040.62	yes
Zfp935	NM_178875	chr13	62453016	62466812	-	2465	1	Zfp935||Zfp935|NM_178875|	93.09	84.7	86.3	121.18	113.63	0.407945	0.0135426	0.624866	Mm.442497	NM_178875	ENSMUSG00000113450	8430426H19Rik|Es113	-	13|13 B3	zinc finger protein 935	protein-coding	no	no	99.78	yes
BC029722	NR_015528	chr2	155817732	155819203	-	1387	1	BC029722||BC029722|NR_015528|	116.06	121.68	126.7	87.04	99.66	-0.39561	0.0137839	0.628731	Mm.330707	NR_015528	ENSMUSG00000074649	-	-	2 H1|2	cDNA sequence BC029722	ncRNA	no	no	110.228	yes
Il15	NM_001254747	chr8	82331624	82402586	-	1260	1	Il15||Il15|NM_001254747|	76.17	79.93	76.21	102.4	107.11	0.426212	0.0138206	0.628731	Mm.4392	NM_008357	ENSMUSG00000031712	AI503618|IL-15	-	8 C2|8 39.33 cM	interleukin 15	protein-coding	no	no	88.364	yes
Phlpp2	NM_001122594	chr8	109868603	109944671	+	7810	1	Phlpp2||Phlpp2|NM_001122594|	430.4	368.63	401.22	502.64	475.02	0.277359	0.0138257	0.628731	Mm.23494	NM_001122594	ENSMUSG00000031732	AI481772|C130044A18Rik|Phlppl	-	8|8 D3	PH domain and leucine rich repeat protein phosphatase 2	protein-coding	no	no	435.582	yes
Tpst1	NM_001130476	chr5	130079370	130135733	+	2043	1	Tpst1||Tpst1|NM_001130476|	53.2	50.1	59.68	83.63	72.65	0.50833	0.0137314	0.628731	Mm.332720	NM_013837	ENSMUSG00000034118	R75054|Tango13a	-	5|5 G1.3	protein-tyrosine sulfotransferase 1	protein-coding	no	no	63.852	yes
Zfp641	NM_173769	chr15	98286122	98296161	-	3740	1	Zfp641||Zfp641|NM_173769|	41.11	50.1	32.13	17.07	29.81	-0.818406	0.0137729	0.628731	Mm.207453	NM_173769	ENSMUSG00000022987	9930016F01Rik|Znf641	-	15|15 F1	zinc finger protein 641	protein-coding	no	no	34.044	yes
Itgb3	NM_016780	chr11	104608000	104670471	+	5750	1	Itgb3||Itgb3|NM_016780|	680.66	629.89	618.82	759.5	797.29	0.262823	0.013789	0.628731	Mm.87150	NM_016780	ENSMUSG00000020689	CD61|GP3A|INGRB3	-	11 E1|11 67.84 cM	integrin beta 3	protein-coding	no	no	697.232	yes
H2-T9	NM_010399	chr17	36038409	36042692	-	1620	1	H2-T9||H2-T9|NM_010399|	101.56	108.56	87.22	67.42	76.38	-0.468455	0.0140819	0.634816	Mm.195061	NM_010399		H-2T9	-	17 B1|17	histocompatibility 2, T region locus 9	protein-coding	no	no	88.228	yes
Skp1a	NM_011543	chr11	52231995	52246858	+	1443	1	Skp1a||Skp1a|NM_011543|	152.33	161.05	169.85	111.79	139.71	-0.374672	0.0140852	0.634816	Mm.42944	NM_011543	ENSMUSG00000036309	15kDa|2610043E24Rik|2610206H23Rik|EMC19|OCP-II|OCP2|SKP1|Tceb1l|p19A|p19Skp1	-	11 B1.3|11 31.86 cM	S-phase kinase-associated protein 1A	protein-coding	no	no	146.946	yes
Gpr146	NM_001362206	chr5	139377697	139396415	+	4800	1	Gpr146||Gpr146|NM_001362206|	603.29	669.25	570.16	840.57	689.25	0.305522	0.0140823	0.634816	Mm.270003	NM_030258	ENSMUSG00000044197	BC003323|D830046C22Rik|PGR8	-	5|5 G2	G protein-coupled receptor 146	protein-coding	no	no	674.504	yes
Ywhab	NM_018753	chr2	163995197	164018587	+	2764	1	Ywhab||Ywhab|NM_018753|	679.46	701.46	693.19	552.13	617.53	-0.254751	0.0141856	0.637066	Mm.34319	NM_018753	ENSMUSG00000018326	1300003C17Rik|14-3-3b	-	2|2 H3	tyrosine 3-monooxygenase/tryptophan 5-monooxygenase activation protein, beta polypeptide	protein-coding	no	no	648.754	yes
Unc13b	NM_001081413	chr4	43058953	43264873	+	6326	1	Unc13b||Unc13b|NM_001081413|	61.66	72.77	78.96	128.86	81.03	0.549701	0.0143206	0.639187	Mm.128892	NM_021468	ENSMUSG00000028456	Munc13-1|Munc13-2|Unc13a|Unc13h1|Unc13h2	-	4|4 A5	unc-13 homolog B	protein-coding	no	no	84.656	yes
Wdr62	NR_152437	chr7	30240138	30280421	-	4728	1	Wdr62||Wdr62|NR_152437|	42.31	54.88	57.84	79.36	70.79	0.520394	0.0143274	0.639187	Mm.271677	NM_146186	ENSMUSG00000037020	2310038K02Rik|b2b1508Clo	-	7|7 B1	WD repeat domain 62	protein-coding	no	no	61.036	yes
Spata2l	NM_001357300	chr8	123232255	123236258	-	2729	1	Spata2l||Spata2l|NM_001357300|	76.17	79.93	93.65	124.59	102.46	0.431254	0.0143511	0.639187	Mm.41459	NM_030176	ENSMUSG00000033594	2610039E05Rik|AI648233	-	8|8 E1	spermatogenesis associated 2-like	protein-coding	no	no	95.36	yes
Fv1	NM_010244	chr4	147868979	147870358	+	1379	1	Fv1||Fv1|NM_010244|	21.76	20.28	21.12	35.84	34.46	0.727723	0.0144608	0.639187	Mm.422607	NM_010244	ENSMUSG00000070583	Fv-1|Rv-1|Rv1	-	4 E2|4 78.56 cM	Friend virus susceptibility 1	protein-coding	no	no	26.692	yes
Hnrnpk	NM_001301340	chr13	58391132	58402512	-	2822	1	Hnrnpk||Hnrnpk|NM_001301340|	637.14	674.03	591.28	507.76	549.53	-0.274785	0.0143988	0.639187	Mm.142872	NM_025279	ENSMUSG00000021546	Hnrpk|KBBP|NOVA	-	13|13 B1	heterogeneous nuclear ribonucleoprotein K	protein-coding	no	no	591.948	yes
Ttc3	NM_009441	chr16	94370739	94469221	+	7204	1	Ttc3||Ttc3|NM_009441|	293.79	326.87	332.36	410.47	366.05	0.277696	0.014449	0.639187	Mm.213408	NM_009441	ENSMUSG00000040785	2610202A04Rik|AA409221|D16Ium21|D16Ium21e|TPRD|mKIAA4119	-	16 C4|16 55.18 cM	tetratricopeptide repeat domain 3	protein-coding	no	no	345.908	yes
Incenp	NM_001369356	chr19	9872295	9899489	-	3150	1	Incenp||Incenp|NM_001369356|	81	90.67	93.65	115.21	120.15	0.396091	0.0143342	0.639187	Mm.29755	NM_016692	ENSMUSG00000024660	2700067E22Rik|AU019509|C130081E20|C77457	-	19 A|19 6.1 cM	inner centromere protein	protein-coding	no	no	100.136	yes
Amotl2	NM_019764	chr9	102717804	102733417	+	4172	1	Amotl2||Amotl2|NM_019764|	35.06	25.05	33.05	50.35	47.5	0.63999	0.0145518	0.64163	Mm.21145	NM_019764	ENSMUSG00000032531	AW549739|C79691|Lccp|MASCOT|mKIAA0989	-	9|9 F1	angiomotin-like 2	protein-coding	no	no	38.202	yes
Olfml2b	NM_177068	chr1	170644532	170682789	+	3080	1	Olfml2b||Olfml2b|NM_177068|	319.17	372.21	349.81	254.31	311.09	-0.310044	0.0147262	0.646391	Mm.287131	NM_177068	ENSMUSG00000038463	1110018N05Rik|4832415H08Rik|AI467542	-	1|1 H3	olfactomedin-like 2B	protein-coding	no	no	321.318	yes
Slc25a25	NM_001164357	chr2	32414487	32451470	-	3287	1	Slc25a25||Slc25a25|NM_001164357|	320.38	357.89	450.8	428.39	528.11	0.329445	0.0148178	0.649283	Mm.37395	NM_146118	ENSMUSG00000026819	1110030N17Rik|MCSC|mKIAA1896	-	2|2 B	solute carrier family 25 (mitochondrial carrier, phosphate carrier), member 25	protein-coding	no	no	417.114	yes
Plec	NM_001164203	chr15	76170974	76208253	-	14892	1	Plec||Plec|NM_001164203|	42.31	68	78.96	116.06	77.31	0.5986	0.0148877	0.651212	Mm.234912	NM_011117	ENSMUSG00000022565	AA591047|AU042537|EBS1|PCN|PLTN|Plec1	-	15 D3|15 35.48 cM	plectin	protein-coding	no	no	76.528	yes
Timm21	NM_025969	chr18	84946191	84951524	-	2407	1	Timm21||Timm21|NM_025969|	89.47	99.02	104.67	65.71	79.17	-0.450176	0.0149684	0.653377	Mm.250617	NM_025969	ENSMUSG00000024645	1700034H14Rik|2700002I20Rik	-	18|18 E4	translocase of inner mitochondrial membrane 21	protein-coding	no	no	87.608	yes
Gpr165	NM_029536	chrX	96713468	96719388	+	3185	1	Gpr165||Gpr165|NM_029536|	523.5	532.06	474.68	389.14	453.6	-0.288332	0.0149889	0.653377	Mm.256065	NM_029536	ENSMUSG00000031210	6530406P05Rik	-	X C3|X	G protein-coupled receptor 165	protein-coding	no	no	474.596	yes
Nedd4l	NM_001114386	chr18	64887756	65217826	+	8102	1	Nedd4l||Nedd4l|NM_001114386|	81	72.77	101.91	121.18	110.84	0.422239	0.0150285	0.653972	Mm.98668	NM_031881	ENSMUSG00000024589	1300012C07Rik|Nedd4-2|Nedd4b	-	18|18 E1	neural precursor cell expressed, developmentally down-regulated gene 4-like	protein-coding	no	no	97.54	yes
Nlgn2	NM_001364137	chr11	69823123	69837784	-	5552	1	Nlgn2||Nlgn2|NM_001364137|	191.02	240.98	228.62	330.26	243.1	0.370833	0.0150827	0.6552	Mm.151293	NM_198862	ENSMUSG00000051790	NL2|NLG2	-	11|11 B3	neuroligin 2	protein-coding	no	no	246.796	yes
Trim41	NM_145377	chr11	48806404	48817391	-	3459	1	Trim41||Trim41|NM_145377|	466.67	501.05	560.98	659.66	577.48	0.266941	0.0151691	0.657824	Mm.794	NM_145377	ENSMUSG00000040365	AW552703|BC020156|R75223|RINCK	-	11|11 B1.2	tripartite motif-containing 41	protein-coding	no	no	553.168	yes
Man2c1	NM_028636	chr9	57130777	57142210	+	3170	1	Man2c1||Man2c1|NM_028636|	313.13	354.31	373.68	251.75	312.96	-0.313777	0.0152281	0.659248	Mm.30110	NM_028636	ENSMUSG00000032295	1110025H24Rik	-	9|9 B	mannosidase, alpha, class 2C, member 1	protein-coding	no	no	321.166	yes
Brk1	NM_133937	chr6	113604772	113616951	+	1090	1	Brk1||Brk1|NM_133937|	319.17	326.87	331.45	258.57	284.08	-0.27733	0.0153099	0.661656	Mm.485793	NM_133937	ENSMUSG00000033940	6720456B07Rik|AW011779	-	6|6 E3	BRICK1, SCAR/WAVE actin-nucleating complex subunit	protein-coding	no	no	304.028	yes
Ptchd1	NM_001093750	chrX	155569736	155623327	-	6484	1	Ptchd1||Ptchd1|NM_001093750|	101.56	89.47	73.45	152.75	102.46	0.531724	0.0154032	0.662409	Mm.218811	NM_001093750	ENSMUSG00000041552	9630036J22Rik|AI848149|Gm387	-	X|X F3	patched domain containing 1	protein-coding	no	no	103.938	yes
Clec16a	NM_001204229	chr16	10545339	10744878	+	6193	1	Clec16a||Clec16a|NM_001204229|	181.35	177.75	209.33	140.81	162.07	-0.342016	0.0154061	0.662409	Mm.159176	NM_177562	ENSMUSG00000068663	4932416N17Rik|curt|mKIAA0350	-	16|16 A1	C-type lectin domain family 16, member A	protein-coding	no	no	174.262	yes
Nfkbie	NM_008690	chr17	45555700	45563168	+	2426	1	Nfkbie||Nfkbie|NM_008690|	367.53	319.71	361.75	395.11	469.43	0.291168	0.0154932	0.665022	Mm.57043	NM_008690	ENSMUSG00000023947	I-kappa-B-epsilon|IKBE|IkB-E|NF-kappa-BIE|ikB-epsilon	-	17|17 B3	nuclear factor of kappa light polypeptide gene enhancer in B cells inhibitor, epsilon	protein-coding	no	no	382.706	yes
C1qc	NM_007574	chr4	136889802	136892914	-	1049	1	C1qc||C1qc|NM_007574|	963.57	959.14	782.25	697.21	771.21	-0.310886	0.0155738	0.667347	Mm.439732	NM_007574	ENSMUSG00000036896	AI385742|Adib|C1qg|Ciqc	-	4 D3|4 69.05 cM	complement component 1, q subcomponent, C chain	protein-coding	no	no	834.676	yes
Lratd2	NM_001162926	chr15	60818996	60825080	-	5560	1	Lratd2||Lratd2|NM_001162926|	165.63	161.05	145.07	227	181.63	0.372741	0.015643	0.668046	Mm.411968	NM_207269	ENSMUSG00000072568	BF642811|D330050I23Rik|Fam84b	-	15|15 D1	LRAT domain containing 1	protein-coding	no	no	176.076	yes
Satb1	NM_001357636	chr17	51736187	51812184	-	6530	1	Satb1||Satb1|NM_001357636|	162.01	184.91	168.94	257.72	190.94	0.376151	0.0157537	0.670703	Mm.311655	NM_009122	ENSMUSG00000023927	2610306G12Rik|AW413156	-	17|17 C	special AT-rich sequence binding protein 1	protein-coding	no	no	192.904	yes
Nsun3	NM_178925	chr16	62734852	62786716	-	1333	1	Nsun3||Nsun3|NM_178925|	21.76	28.63	23.87	46.08	35.39	0.713863	0.0157584	0.670703	Mm.26321	NM_178925	ENSMUSG00000050312	6720484A09Rik|AU022521	-	16|16 C1.3	NOL1/NOP2/Sun domain family member 3	protein-coding	no	no	31.146	yes
Map3k10	NM_001290528	chr7	27656375	27674581	-	3650	1	Map3k10||Map3k10|NM_001290528|	155.96	161.05	205.66	107.52	153.68	-0.437068	0.015997	0.678077	Mm.389883	NM_001081292	ENSMUSG00000040390	BC028668|BC046514|MST|Mlk2	-	7|7 A3	mitogen-activated protein kinase kinase kinase 10	protein-coding	no	no	156.774	yes
Dusp8	NM_008748	chr7	142079487	142095284	-	4806	1	Dusp8||Dusp8|NM_008748|	345.77	200.42	349.81	375.48	447.08	0.445943	0.0160894	0.680202	Mm.39725	NM_008748	ENSMUSG00000037887	5530400B01Rik|AI593498|Nttp1	-	7 F5|7 87.59 cM	dual specificity phosphatase 8	protein-coding	no	no	343.712	yes
Prr14l	NM_194340	chr5	32789207	32854230	-	10525	1	Prr14l||Prr14l|NM_194340|	680.66	700.27	657.38	888.36	760.97	0.268195	0.0161239	0.680521	Mm.248721	NM_194340	ENSMUSG00000054280	6030436E02Rik|C330019G07Rik|Prl14l	-	5|5 B1	proline rich 14-like	protein-coding	no	no	737.528	yes
Mmp11	NM_008606	chr10	75923222	75932502	-	2273	1	Mmp11||Mmp11|NM_008606|	29.02	51.3	40.4	60.59	62.4	0.599358	0.016221	0.682335	Mm.4561	NM_008606	ENSMUSG00000000901	MMP-11|SL-3|ST3|Stmy3	-	10 C1|10 38.62 cM	matrix metallopeptidase 11	protein-coding	no	no	48.742	yes
Slc39a11	NM_001166503	chr11	113244855	113565815	-	2723	1	Slc39a11||Slc39a11|NM_001166503|	118.48	139.58	143.23	86.19	116.43	-0.420024	0.0163238	0.682959	Mm.341021	NM_027216	ENSMUSG00000041654	1810074D23Rik|ZIP-11	-	11|11 E2	solute carrier family 39 (metal ion transporter), member 11	protein-coding	no	no	120.782	yes
Unc13a	NM_001029873	chr8	71626712	71671757	-	7877	1	Unc13a||Unc13a|NM_001029873|	19.34	15.51	26.63	34.99	35.39	0.740619	0.016344	0.682959	Mm.334606	NM_001029873	ENSMUSG00000034799	2410078G03Rik|Munc13-1	-	8|8 B3.3	unc-13 homolog A	protein-coding	no	no	26.372	yes
Cst7	NM_009977	chr2	150570415	150578944	+	979	1	Cst7||Cst7|NM_009977|	33.85	26.25	27.54	16.21	16.77	-0.82591	0.0162874	0.682959	Mm.12965	NM_009977	ENSMUSG00000068129	Cmap	-	2|2 G3	cystatin F (leukocystatin)	protein-coding	no	no	24.124	yes
Aptx	NM_025545	chr4	40682078	40702916	-	5674	1	Aptx||Aptx|NM_025545|	79.79	99.02	123.95	180.06	111.77	0.517852	0.0163974	0.684057	Mm.430710	NM_025545	ENSMUSG00000028411	2410016G21Rik|AA388047|FHA-HIT	-	4|4 A5	aprataxin	protein-coding	no	no	118.918	yes
Idua	NM_008325	chr5	108660331	108685446	+	4401	1	Idua||Idua|NM_008325|	500.52	496.27	455.39	380.6	426.59	-0.274417	0.0166261	0.687911	Mm.358608	NM_008325	ENSMUSG00000033540	6030426D08	-	5 F|5 53.24 cM	iduronidase, alpha-L	protein-coding	no	no	451.874	yes
Mprip	NM_001368931	chr11	59662507	59780862	+	12819	1	Mprip||Mprip|NM_001368931|	473.93	464.06	511.4	369.51	439.63	-0.271221	0.0165593	0.687911	Mm.2402	NM_012027	ENSMUSG00000005417	9530046C02|AA536749|AI647711|C76423|Gm34094|RIP3|Rhoip3|mKIAA0864|p116Rip	-	11|11 B1.3	myosin phosphatase Rho interacting protein	protein-coding	no	no	451.706	yes
Setd1a	NM_178029	chr7	127777389	127800119	+	5894	1	Setd1a||Setd1a|NM_178029|	490.85	533.26	566.49	680.99	597.04	0.257183	0.0166866	0.688682	Mm.435494	NM_010940	ENSMUSG00000042308	BC010250|KMT2F|Nsccn1|mKIAA0339|mNSC1	-	7|7 F3	SET domain containing 1A	protein-coding	no	no	573.726	yes
Stk35	NM_183262	chr2	129800517	129832285	+	6186	1	Stk35||Stk35|NM_183262|	252.68	270.8	298.39	349.88	320.41	0.276741	0.0167426	0.689342	Mm.389329	NM_183262	ENSMUSG00000037885	1700054C12Rik|CLIK1|Stk35l1	-	2|2 F1	serine/threonine kinase 35	protein-coding	no	no	298.432	yes
Basp1	NM_027395	chr15	25363277	25413764	-	1852	1	Basp1||Basp1|NM_027395|	874.1	789.74	738.18	646.86	685.52	-0.278789	0.0169184	0.694314	Mm.29586	NM_027395	ENSMUSG00000045763	2610024P12Rik|CAP-23|CAP23|Ckap3|NAP-22|NAP22	-	15|15 B1	brain abundant, membrane attached signal protein 1	protein-coding	no	no	746.88	yes
Raph1	NM_001045513	chr1	60483185	60566765	-	9090	1	Raph1||Raph1|NM_001045513|	91.88	116.91	123.95	162.14	133.19	0.397989	0.0169958	0.695232	Mm.440325	NM_001045513	ENSMUSG00000026014	9430025M21Rik|C730009O10Rik|Lpd	-	1|1 C2	Ras association (RalGDS/AF-6) and pleckstrin homology domains 1	protein-coding	no	no	125.614	yes
Lzts3	NM_197945	chr2	130632765	130642844	-	4310	1	Lzts3||Lzts3|NM_197945|	90.67	114.52	123.03	184.33	121.08	0.469296	0.0170922	0.696617	Mm.440130	NM_197945	ENSMUSG00000037703	Prosapip1	-	2|2 F1	leucine zipper, putative tumor suppressor family member 3	protein-coding	no	no	126.726	yes
1110032A03Rik	NM_023483	chr9	50761374	50768184	-	3261	1	1110032A03Rik||1110032A03Rik|NM_023483|	54.4	95.44	57.84	40.11	47.5	-0.666639	0.0171401	0.696617	Mm.171374	NM_023483	ENSMUSG00000037971	4930500N06Rik|c11orf1	-	9|9 A5.3	RIKEN cDNA 1110032A03 gene	protein-coding	no	no	59.058	yes
Zdhhc8	NM_172151	chr16	18220753	18235136	-	4847	1	Zdhhc8||Zdhhc8|NM_172151|	397.76	399.64	420.51	329.4	356.73	-0.25665	0.0171353	0.696617	Mm.326263	NM_172151	ENSMUSG00000060166	D16H22S1738E|DHHC-8|E330009O14Rik|Op53c05|ZDHHCL1	-	16 A3|16 11.29 cM	zinc finger, DHHC domain containing 8	protein-coding	no	no	380.808	yes
Htatip2	NM_001146052	chr7	49759512	49773999	+	1280	1	Htatip2||Htatip2|NM_001146052|	12.09	16.7	23.87	32.43	29.81	0.781699	0.01731	0.697904	Mm.20801	NM_016865	ENSMUSG00000039745	AW111545|Cc3|Tip30	-	7|7 B4	HIV-1 Tat interactive protein 2	protein-coding	no	no	22.98	yes
Hnmt	NM_080462	chr2	24002913	24049379	-	1625	1	Hnmt||Hnmt|NM_080462|	143.87	144.35	158.84	112.65	123.88	-0.349889	0.0172641	0.697904	Mm.33120	NM_080462	ENSMUSG00000026986	1500031F01Rik|AI788969	-	2|2 A3	histamine N-methyltransferase	protein-coding	no	no	136.718	yes
Mllt6	NM_139311	chr11	97663412	97685458	+	7232	1	Mllt6||Mllt6|NM_139311|	752	707.43	762.97	881.53	877.39	0.23464	0.0173702	0.699213	Mm.23685	NM_139311	ENSMUSG00000038437	AI315037|Af17	-	11 D|11 61.05 cM	myeloid/lymphoid or mixed-lineage leukemia; translocated to, 6	protein-coding	no	no	796.264	yes
Trappc9	NM_180662	chr15	72589620	73061204	-	4005	1	Trappc9||Trappc9|NM_180662|	255.1	229.05	243.31	163.85	219.81	-0.353698	0.0174092	0.699667	Mm.158902	NM_029640	ENSMUSG00000047921	1810044A24Rik|2900005P22Rik|4632408O18Rik|Ibp|Nibp|TRS130|mKIAA1882	-	15|15 D3	trafficking protein particle complex 9	protein-coding	no	no	222.224	yes
Cst3	NM_009976	chr2	148871722	148875512	-	791	1	Cst3||Cst3|NM_009976|	611.75	609.61	485.69	440.34	481.54	-0.316871	0.0174776	0.700465	Mm.4263	NM_009976	ENSMUSG00000027447	CysC	-	2 G3|2 73.6 cM	cystatin C	protein-coding	no	no	525.786	yes
Peg10	NM_130877	chr6	4747306	4760516	+	6663	1	Peg10||Peg10|NM_130877|	414.69	446.17	594.03	730.49	529.04	0.366384	0.0174954	0.700465	Mm.320575	NM_130877	ENSMUSG00000092035	AA407948|Edr|HB-1|MEF3L|Mar2|Mart2|MyEF-3|Rtl2	-	6 A1|6 1.81 cM	paternally expressed 10	protein-coding	no	no	542.884	yes
F3	NM_010171	chr3	121723537	121735052	+	1865	1	F3||F3|NM_010171|	29.02	22.67	33.05	43.52	45.64	0.630974	0.0175123	0.700465	Mm.273188	NM_010171	ENSMUSG00000028128	AA409063|CD142|Cf-3|Cf3|TF	-	3 G1|3 52.94 cM	coagulation factor III	protein-coding	no	no	34.78	yes
Alyref2	NM_019484	chr1	171503478	171504750	+	1272	1	Alyref2||Alyref2|NM_019484|	31.43	27.44	44.07	54.62	52.16	0.604986	0.0175584	0.701197	Mm.389208	NM_019484	ENSMUSG00000060244	C130042O11Rik|REF2|Refbp2	-	1|1 H3	Aly/REF export factor 2	protein-coding	no	no	41.944	yes
Rac1	NM_001347530	chr5	143505481	143528031	-	2351	1	Rac1||Rac1|NM_001347530|	936.97	960.34	852.03	749.26	793.57	-0.261667	0.0176065	0.702008	Mm.292510	NM_009007	ENSMUSG00000001847	AL023026|D5Ertd559e	-	5 G2|5 82.22 cM	Rac family small GTPase 1	protein-coding	no	no	858.434	yes
Kdelr2	NM_025841	chr5	143403820	143421904	+	1841	1	Kdelr2||Kdelr2|NM_025841|	339.73	297.05	303.9	250.04	265.45	-0.294117	0.0177819	0.705658	Mm.181880	NM_025841	ENSMUSG00000079111	1110007A14Rik	-	5|5 G2	KDEL (Lys-Asp-Glu-Leu) endoplasmic reticulum protein retention receptor 2	protein-coding	no	no	291.234	yes
Stk11	NR_126043	chr10	80115795	80130679	+	3860	1	Stk11||Stk11|NR_126043|	385.67	343.57	426.01	479.6	455.46	0.265316	0.017757	0.705658	Mm.44231	NM_011492	ENSMUSG00000003068	AA408040|Lkb1|Par-4|R75140	-	10|10 C1	serine/threonine kinase 11	protein-coding	no	no	418.062	yes
H2-Q4	NM_001143689	chr17	35379617	35384674	+	1782	1	H2-Q4||H2-Q4|NM_001143689|	339.73	279.15	320.43	363.54	409.82	0.290426	0.0177399	0.705658	Mm.464284	NM_001143689	ENSMUSG00000035929	H-2Q4|H2-D1|H2-Gs10|Qa-4|Qa4|Qat-4|Qb-1|Qb1	-	17 B1|17 18.65 cM	histocompatibility 2, Q region locus 4	protein-coding	no	no	342.534	yes
Ppfibp1	NM_001355729	chr6	146888494	147032025	+	4950	1	Ppfibp1||Ppfibp1|NM_001355729|	45.94	56.07	69.78	99.84	69.86	0.548492	0.0178241	0.706221	Mm.103382	NM_026221	ENSMUSG00000016487	4632409B19Rik|AW214454|AW261454	-	6|6 G3	PTPRF interacting protein, binding protein 1 (liprin beta 1)	protein-coding	no	no	68.298	yes
Prps2	NM_001313758	chrX	167346320	167382749	-	3697	1	Prps2||Prps2|NM_001313758|	345.77	345.96	363.58	303.8	287.81	-0.261721	0.0178535	0.706277	Mm.272955	NM_026662	ENSMUSG00000025742	2610101M19Rik|AA589463|AI464149|Prps-2	-	X F5|X 78.32 cM	phosphoribosyl pyrophosphate synthetase 2	protein-coding	no	no	329.384	yes
Tbrg3	NR_027799	chr15	82890483	82898461	-	7978	1	Tbrg3||Tbrg3|NR_027799|	4.84	44.14	34.89	70.83	49.37	1.09015	0.0179281	0.707012	Mm.417272	NR_027799		TB-11	-	15|15 E1	transforming growth factor beta regulated gene 3	ncRNA	no	no	40.814	yes
Ltf	NM_008522	chr9	111019292	111042766	+	2709	1	Ltf||Ltf|NM_008522|	139.03	68	73.45	41.82	68.92	-0.773097	0.0179149	0.707012	Mm.282359	NM_008522	ENSMUSG00000032496	Csp82|Lf|MMS10R|Ms10r	-	9 F2|9 60.79 cM	lactotransferrin	protein-coding	no	no	78.244	yes
Timp3	NM_011595	chr10	86300412	86349505	+	4672	1	Timp3||Timp3|NM_011595|	9.67	23.86	27.54	46.08	29.81	0.868429	0.0181309	0.712782	Mm.4871	NM_011595	ENSMUSG00000020044	Timp-3	-	10 C1|10 42.83 cM	tissue inhibitor of metalloproteinase 3	protein-coding	no	no	27.392	yes
Maml1	NM_175334	chr11	50255635	50292336	-	5543	1	Maml1||Maml1|NM_175334|	591.2	436.63	502.22	666.48	610.08	0.310653	0.0183787	0.717707	Mm.51116	NM_175334	ENSMUSG00000050567	AI644666|AW743257|D930008C07Rik|Mam-1|Mam1|mKIAA0200	-	11|11 B1.3	mastermind like transcriptional coactivator 1	protein-coding	no	no	561.322	yes
Clu	NM_013492	chr14	65968483	65981548	+	1794	1	Clu||Clu|NM_013492|	33.85	44.14	44.99	56.32	66.13	0.556533	0.0185594	0.71954	Mm.200608	NM_013492	ENSMUSG00000022037	AI893575|ApoJ|Cli|D14Ucla3|SP-40|Sgp-2|Sgp2|Sugp-2	-	14 D1|14 34.36 cM	clusterin	protein-coding	no	no	49.086	yes
Tagap1	NM_147155	chr17	6954965	6961156	-	2351	1	Tagap1||Tagap1|NM_147155|	60.45	69.19	67.94	102.4	81.03	0.468506	0.0185323	0.71954	Mm.371734	NM_147155	ENSMUSG00000052031	2610315E15Rik|AA415005|FKSG15	-	17|17 A1	T cell activation GTPase activating protein 1	protein-coding	no	no	76.202	yes
Gadd45b	NM_008655	chr10	80930091	80932204	+	1259	1	Gadd45b||Gadd45b|NM_008655|	250.26	217.12	229.53	283.32	288.74	0.289282	0.0186303	0.721183	Mm.1360	NM_008655	ENSMUSG00000015312	AI323528|Myd118	-	10 C1|10 39.72 cM	growth arrest and DNA-damage-inducible 45 beta	protein-coding	no	no	253.794	yes
Slc25a26	NM_026255	chr6	94500314	94604652	+	1900	1	Slc25a26||Slc25a26|NM_026255|	33.85	64.42	67.94	87.04	80.1	0.57096	0.0187068	0.721478	Mm.280725	NM_026255	ENSMUSG00000045100	4930433D19Rik|4933433F13Rik|AW557176|D6Bwg0781e|Slc25a6	-	6|6 D2	solute carrier family 25 (mitochondrial carrier, phosphate carrier), member 26	protein-coding	no	no	66.67	yes
Fam3a	NM_025473	chrX	74384720	74393274	-	1883	1	Fam3a||Fam3a|NM_025473|	226.08	272	258.91	199.69	213.29	-0.302248	0.0187795	0.722524	Mm.166485	NM_025473	ENSMUSG00000031399	1810037C20Rik	-	X|X A7.3	family with sequence similarity 3, member A	protein-coding	no	no	233.994	yes
Cyp4v3	NM_133969	chr8	45305801	45333163	-	2877	1	Cyp4v3||Cyp4v3|NM_133969|	391.71	398.45	353.48	279.05	343.69	-0.304786	0.0189895	0.727276	Mm.245297	NM_133969	ENSMUSG00000079057	AU043077|AW111961|Cyp4v2	-	8|8 B1.1	cytochrome P450, family 4, subfamily v, polypeptide 3	protein-coding	no	no	353.276	yes
Adam8	NM_001291066	chr7	139978932	139992562	-	3067	1	Adam8||Adam8|NM_001291066|	14.51	21.47	20.2	32.43	30.74	0.733988	0.0189531	0.727276	Mm.15969	NM_007403	ENSMUSG00000025473	ADAM 8|CD156|CD156a|E430039A18Rik|MS2	-	7|7 F4	a disintegrin and metallopeptidase domain 8	protein-coding	no	no	23.87	yes
C1qa	NM_007572	chr4	136895916	136898844	-	1077	1	C1qa||C1qa|NM_007572|	916.42	920.97	750.12	680.99	736.75	-0.297101	0.018988	0.727276	Mm.439957	NM_007572	ENSMUSG00000036887	AI255395|Adic|C1q	-	4 D3|4 69.05 cM	complement component 1, q subcomponent, alpha polypeptide	protein-coding	no	no	801.05	yes
Yy1	NM_009537	chr12	108793297	108820148	+	5845	1	Yy1||Yy1|NM_009537|	787.06	777.81	792.35	995.03	881.12	0.243767	0.0190356	0.727938	Mm.3868	NM_009537	ENSMUSG00000021264	NF-E1|YY-1	-	12 F1|12 59.58 cM	YY1 transcription factor	protein-coding	no	no	846.674	yes
Slc15a2	NM_021301	chr16	36750164	36784962	-	3964	1	Slc15a2||Slc15a2|NM_021301|	71.33	151.51	154.25	308.07	122.02	0.768442	0.0191744	0.731031	Mm.281804	NM_021301	ENSMUSG00000022899	8430408C16Rik|C78862|Pept2	-	16|16 B3	solute carrier family 15 (H+/peptide transporter), member 2	protein-coding	no	no	161.436	yes
Bid	NM_007544	chr6	120893119	120916824	-	1884	1	Bid||Bid|NM_007544|	235.75	263.65	260.75	335.38	287.81	0.287779	0.0192447	0.732606	Mm.235081	NM_007544	ENSMUSG00000004446	2700049M22Rik|AI875481|AU022477	-	6 F1|6 57.02 cM	BH3 interacting domain death agonist	protein-coding	no	no	276.668	yes
Gsn	NM_146120	chr2	35282380	35307902	+	2630	1	Gsn||Gsn|NM_146120|	18.13	26.25	38.56	55.47	38.19	0.728464	0.0196278	0.741617	Mm.443	NM_146120	ENSMUSG00000026879	ADF	-	2 B|2 23.5 cM	gelsolin	protein-coding	no	no	35.32	yes
Pcm1	NM_023662	chr8	41239759	41334087	+	8306	1	Pcm1||Pcm1|NM_023662|	442.49	403.22	424.18	539.33	481.54	0.259045	0.0196031	0.741617	Mm.117896	NM_023662	ENSMUSG00000031592	2600002H09Rik|9430077F19Rik|C030044G17Rik	-	8 A4|8 23.89 cM	pericentriolar material 1	protein-coding	no	no	458.152	yes
Peak1	NM_172924	chr9	56201129	56418050	-	10966	1	Peak1||Peak1|NM_172924|	588.78	551.15	556.39	695.5	655.72	0.245252	0.019593	0.741617	Mm.490331	NM_172924	ENSMUSG00000074305	1110049L02Rik|9530046P14|AA690169|BE132841|C230081A13Rik|SGK269|mKIAA2002	-	9|9 B	pseudopodium-enriched atypical kinase 1	protein-coding	no	no	609.508	yes
D17H6S56E-5	NM_033075	chr17	34996724	35000746	-	3323	1	D17H6S56E-5||D17H6S56E-5|NM_033075|	738.7	781.39	854.78	992.47	894.16	0.240657	0.0195433	0.741617	Mm.22506	NM_033075		G7e	-	17 B1|17 18.54 cM	DNA segment, Chr 17, human D6S56E 5	protein-coding	no	no	852.3	yes
Hmg20a	NM_025812	chr9	56418619	56496936	+	3749	1	Hmg20a||Hmg20a|NM_025812|	467.88	589.32	592.2	355.86	514.14	-0.352305	0.0197449	0.744283	Mm.150856	NM_025812	ENSMUSG00000032329	1200004E06Rik|5730490E10Rik|Hmgxb1|Ibraf	-	9|9 B	high mobility group 20A	protein-coding	no	no	503.88	yes
Zfp335	NM_199027	chr2	164891892	164911750	-	4515	1	Zfp335||Zfp335|NM_199027|	291.37	273.19	292.89	356.71	335.31	0.264189	0.0197579	0.744283	Mm.330776	NM_199027	ENSMUSG00000039834	1810045J01Rik|NIF-1|Nif1|Znf335	-	2|2 H3	zinc finger protein 335	protein-coding	no	no	309.894	yes
Afg3l2	NM_027130	chr18	67404764	67449192	-	3081	1	Afg3l2||Afg3l2|NM_027130|	204.32	151.51	190.97	226.14	237.51	0.332633	0.0198691	0.745602	Mm.426052	NM_027130	ENSMUSG00000024527	2310036I02Rik|AW260507|Emv66|par	-	18|18 E1	AFG3-like AAA ATPase 2	protein-coding	no	no	202.09	yes
Ccdc9b	NM_001001982	chr2	118754145	118762661	-	4695	1	Ccdc9b||Ccdc9b|NM_001001982|	18.13	13.12	13.77	35.84	20.49	0.908343	0.0198815	0.745602	Mm.379342	NM_001001982	ENSMUSG00000045838	A430105I19Rik|Gm353	-	2|2 E5	coiled-coil domain containing 9B	protein-coding	no	no	20.27	yes
Ccdc62	NM_001134767	chr5	123930689	123969895	+	3895	1	Ccdc62||Ccdc62|NM_001134767|	102.76	170.59	150.57	64	123.88	-0.606155	0.019878	0.745602	Mm.243679	NM_001134767	ENSMUSG00000061882	AI661708|G1-485-3|Gm150|repro29	-	5|5 F	coiled-coil domain containing 62	protein-coding	no	no	122.36	yes
Magi1	NM_001029850	chr6	93675453	94283917	-	7759	1	Magi1||Magi1|NM_001029850|	252.68	237.4	224.94	313.19	276.63	0.29971	0.0201271	0.749614	Mm.217216	NM_010367	ENSMUSG00000045095	AIP3|BAP1|Baiap1|Gukmi1|MAGI1c|Magi-1|TNRC19|WWP3|mKIAA4129	-	6|6 D1	membrane associated guanylate kinase, WW and PDZ domain containing 1	protein-coding	no	no	260.968	yes
Socs7	NM_138657	chr11	97362292	97398542	+	7255	1	Socs7||Socs7|NM_138657|	385.67	356.7	417.75	483.01	447.08	0.252577	0.0203152	0.749614	Mm.34339	NM_138657	ENSMUSG00000038485	2310063P06Rik|C85125|Nap4	-	11|11 D	suppressor of cytokine signaling 7	protein-coding	no	no	418.042	yes
Sparc	NM_001290817	chr11	55394159	55420080	-	2619	1	Sparc||Sparc|NM_001290817|	1448.38	1476.89	1200	1070.13	1193.14	-0.296461	0.0202296	0.749614	Mm.291442	NM_009242	ENSMUSG00000018593	BM-40|ON	-	11 B1.3|11 33.04 cM	secreted acidic cysteine rich glycoprotein	protein-coding	no	no	1277.71	yes
Haghl	NM_001271433	chr17	25782787	25785586	-	1303	1	Haghl||Haghl|NM_001271433|	49.57	66.81	89.06	106.67	90.35	0.499952	0.0202631	0.749614	Mm.29230	NM_026897	ENSMUSG00000061046	1500017E18Rik|2810014I23Rik|C330022E15Rik	-	17|17 A3.3	hydroxyacylglutathione hydrolase-like	protein-coding	no	no	80.492	yes
Atp10d	NR_003966	chr5	72203329	72298771	+	6003	1	Atp10d||Atp10d|NR_003966|	184.98	183.72	170.77	227	219.81	0.305901	0.0201324	0.749614	Mm.32775	NM_153389	ENSMUSG00000046808	9830145H18Rik|ATPVD|D5Buc24e	-	5|5 C3.2	ATPase, class V, type 10D	protein-coding	no	no	197.256	yes
Mpp7	NM_001360860	chr18	7347962	7608154	-	5267	1	Mpp7||Mpp7|NM_001360860|	42.31	29.82	42.23	61.44	53.09	0.56996	0.0202814	0.749614	Mm.133293	NM_001081287	ENSMUSG00000057440	1110068J02Rik|2810038M04Rik|5430426E14Rik|AI415104|Gm955	-	18|18 A1	membrane protein, palmitoylated 7 (MAGUK p55 subfamily member 7)	protein-coding	no	no	45.778	yes
Kctd2	NM_183285	chr11	115420126	115431274	+	1755	1	Kctd2||Kctd2|NM_183285|	169.26	192.07	201.07	144.22	159.27	-0.321364	0.0201626	0.749614	Mm.276299	NM_183285	ENSMUSG00000016940	2310012I15Rik	-	11|11 E2	potassium channel tetramerisation domain containing 2	protein-coding	no	no	173.178	yes
Dhrs7	NM_025522	chr12	72650353	72664828	-	1291	1	Dhrs7||Dhrs7|NM_025522|	90.67	107.37	112.01	73.39	82.9	-0.421331	0.020576	0.754823	Mm.289653	NM_025522	ENSMUSG00000021094	2310016E22Rik|5730564L20Rik|AW061210|Retdsr4|Retsdr4	-	12|12 C3	dehydrogenase/reductase (SDR family) member 7	protein-coding	no	no	93.268	yes
Ccr1l1	NM_007718	chr9	123976430	123986715	-	2155	1	Ccr1l1||Ccr1l1|NM_007718|	43.52	73.96	67.94	31.57	47.5	-0.664336	0.0205559	0.754823	Mm.423532	NM_007718	ENSMUSG00000064039	Cmkbr1l1	-	9 F4|9 75.05 cM	chemokine (C-C motif) receptor 1-like 1	protein-coding	no	no	52.898	yes
Aifm1	NM_001290364	chrX	48474944	48513563	-	2194	1	Aifm1||Aifm1|NM_001290364|	53.2	51.3	52.33	68.27	79.17	0.482361	0.0205211	0.754823	Mm.240434	NM_012019	ENSMUSG00000036932	AIF|AIFsh2|Hq|Pdcd8	-	X A5|X 25.68 cM	apoptosis-inducing factor, mitochondrion-associated 1	protein-coding	no	no	60.854	yes
Tmco3	NM_172282	chr8	13288013	13322924	+	4508	1	Tmco3||Tmco3|NM_172282|	137.83	134.81	147.82	186.89	166.72	0.322888	0.020677	0.757425	Mm.219813	NM_172282	ENSMUSG00000038497	B230339H12Rik|C87304	-	8|8 A1.1	transmembrane and coiled-coil domains 3	protein-coding	no	no	154.814	yes
Tmem154	NM_177260	chr3	84666192	84704575	+	3329	1	Tmem154||Tmem154|NM_177260|	36.27	52.49	34.89	73.39	53.09	0.619295	0.0208075	0.757807	Mm.107370	NM_177260	ENSMUSG00000056498	9930117H01Rik	-	3|3 F1	transmembrane protein 154	protein-coding	no	no	50.026	yes
Tmem33	NM_001285452	chr5	67260565	67291461	+	6391	1	Tmem33||Tmem33|NM_001285452|	453.37	455.71	426.93	367.8	384.67	-0.254346	0.0207827	0.757807	Mm.23217	NM_028975	ENSMUSG00000037720	1110006G02Rik|1600019D15Rik|2410089A21Rik|2700052H22Rik|5430406L04Rik|AA388285|AI314185|AI426615|db83	-	5|5 C3.1	transmembrane protein 33	protein-coding	no	no	417.696	yes
Ppp4r1l-ps	NR_027957	chr2	173579320	173659539	-	4437	1	Ppp4r1l-ps||Ppp4r1l-ps|NR_027957|	106.39	130.03	124.87	176.65	138.78	0.379495	0.0207507	0.757807	Mm.260590	NM_001033179	ENSMUSG00000055897	1700007P14Rik|5830403E09Rik|C030010B13Rik|Ppp4r1l	-	2|2 H3	protein phosphatase 4, regulatory subunit 1-like, pseudogene	pseudo	no	no	135.344	yes
Tradd	NM_001033161	chr8	105258575	105264594	-	1376	1	Tradd||Tradd|NM_001033161|	74.96	52.49	92.73	115.21	95	0.495934	0.0208618	0.758691	Mm.264255	NM_001033161	ENSMUSG00000031887	9130005N23Rik|AA930854	-	8 D3|8 53.04 cM	TNFRSF1A-associated via death domain	protein-coding	no	no	86.078	yes
Mrpl13	NM_026759	chr15	55534095	55557312	-	773	1	Mrpl13||Mrpl13|NM_026759|	31.43	40.56	33.97	18.77	24.22	-0.72628	0.0209503	0.759718	Mm.236795	NM_026759	ENSMUSG00000022370	1110002D09Rik	-	15|15 D1	mitochondrial ribosomal protein L13	protein-coding	no	no	29.79	yes
Als2cl	NM_001146060	chr9	110880322	110900530	+	5115	1	Als2cl||Als2cl|NM_001146060|	64.08	84.7	89.98	108.38	106.18	0.410909	0.0210672	0.761186	Mm.86338	NM_146228	ENSMUSG00000044037	79H19D|79H19E|BC022645|D930044G19Rik|mRn.49018	-	9 F2|9 60.79 cM	ALS2 C-terminal like	protein-coding	no	no	90.664	yes
Insig1	NM_153526	chr5	28071412	28078662	+	2639	1	Insig1||Insig1|NM_153526|	201.9	163.44	157	203.96	248.69	0.367674	0.0211415	0.761186	Mm.30221	NM_153526	ENSMUSG00000045294	1810013C12Rik|Insig-1	-	5|5 B1	insulin induced gene 1	protein-coding	no	no	194.998	yes
Aen	NM_001360709	chr7	78896058	78911209	+	5005	1	Aen||Aen|NM_001360709|	54.4	64.42	80.8	99.84	85.69	0.456591	0.0211139	0.761186	Mm.34109	NM_026531	ENSMUSG00000030609	2700083B06Rik|Isg20l1	-	7|7 D2	apoptosis enhancing nuclease	protein-coding	no	no	77.03	yes
Cfl1	NM_007687	chr19	5490455	5494031	+	1177	1	Cfl1||Cfl1|NM_007687|	545.26	545.19	492.12	422.42	464.78	-0.262017	0.0211171	0.761186	Mm.329655	NM_007687	ENSMUSG00000056201	AA959946|Cof	-	19|19 A	cofilin 1, non-muscle	protein-coding	no	no	493.954	yes
Gin1	NM_026250	chr1	97770172	97793708	+	2770	1	Gin1||Gin1|NM_026250|	26.6	36.98	35.81	58.88	43.78	0.618498	0.0210491	0.761186	Mm.86090	NM_026250	ENSMUSG00000026333	4930429M06Rik|8430411H10Rik|Gin-1|Zh2c2	-	1|1 D	gypsy retrotransposon integrase 1	protein-coding	no	no	40.41	yes
Rbx1	NM_019712	chr15	81466316	81476369	+	1646	1	Rbx1||Rbx1|NM_019712|	94.3	136	138.64	165.55	156.48	0.371786	0.0212114	0.762615	Mm.29405	NM_019712	ENSMUSG00000022400	1500002P15Rik|AA517855|ROC1	-	15|15 E1	ring-box 1	protein-coding	no	no	138.194	yes
Ctso	NM_177662	chr3	81932601	81956725	+	3453	1	Ctso||Ctso|NM_177662|	414.69	459.29	419.59	361.83	367.91	-0.251807	0.0213553	0.765605	Mm.254642	NM_177662	ENSMUSG00000028015	A330105D01Rik|AI118514	-	3|3 E3	cathepsin O	protein-coding	no	no	404.662	yes
Scarb1	NM_016741	chr5	125277087	125341094	-	2496	1	Scarb1||Scarb1|NM_016741|	244.22	277.96	258.91	303.8	330.65	0.273044	0.0214469	0.766713	Mm.282242	NM_016741	ENSMUSG00000037936	AI120173|CD36|Cd36l1|Chohd1|Cla-1|Cla1|D5Ertd460e|Hdlq1|Hlb398|SR-B1|SR-BI|SRBI|Srb1|mSR-BI	-	5 64.11 cM|5 G1.1	scavenger receptor class B, member 1	protein-coding	no	no	283.108	yes
Usp42	NM_029749	chr5	143710326	143732280	-	5115	1	Usp42||Usp42|NM_029749|	181.35	186.1	201.99	242.36	225.4	0.287697	0.0214405	0.766713	Mm.259620	NM_029749	ENSMUSG00000051306	2410140K03Rik|3110031A07Rik|A630018G05Rik|D5Ertd591e	-	5 G2|5 82.5 cM	ubiquitin specific peptidase 42	protein-coding	no	no	207.44	yes
Myo1c	NM_001080775	chr11	75656015	75674634	+	5239	1	Myo1c||Myo1c|NM_001080775|	448.54	427.08	494.87	596.51	506.69	0.259488	0.0216867	0.770916	Mm.234502	NM_008659	ENSMUSG00000017774	C80397|MMIb|MYO1E|NMI|mm1beta|myr2	-	11 B5|11 45.92 cM	myosin IC	protein-coding	no	no	494.738	yes
Tnfrsf17	NM_011608	chr16	11313809	11320068	+	807	1	Tnfrsf17||Tnfrsf17|NM_011608|	55.61	62.03	56.01	26.45	48.43	-0.646649	0.0216772	0.770916	Mm.12935	NM_011608	ENSMUSG00000022496	BCM|BCMA|Tnfrsf13|Tnfrsf13a	-	16|16 A1	tumor necrosis factor receptor superfamily, member 17	protein-coding	no	no	49.706	yes
Slc7a8	NM_016972	chr14	54722215	54781886	-	4013	1	Slc7a8||Slc7a8|NM_016972|	1951.32	2056.67	1738.03	1494.26	1701.7	-0.276466	0.0216547	0.770916	Mm.276831	NM_016972	ENSMUSG00000022180	AA408822|LAT2	-	14|14 C2	solute carrier family 7 (cationic amino acid transporter, y+ system), member 8	protein-coding	no	no	1788.4	yes
Agk	NM_023538	chr6	40325478	40396762	+	2194	1	Agk||Agk|NM_023538|	38.69	29.82	34.89	20.48	22.35	-0.695863	0.0220175	0.780477	Mm.32840	NM_023538	ENSMUSG00000029916	2610037M15Rik|6720408I04Rik|AI465370|Mulk	-	6|6 B1	acylglycerol kinase	protein-coding	no	no	29.246	yes
Serpine2	NM_009255	chr1	79794321	79858665	-	2038	1	Serpine2||Serpine2|NM_009255|	750.79	779.01	689.52	609.31	643.61	-0.252345	0.0220512	0.780577	Mm.3093	NM_009255	ENSMUSG00000026249	B230326M24Rik|PAI-1|PI-7|PI7|PN-1|Spi4	-	1 C4|1 40.97 cM	serine (or cysteine) peptidase inhibitor, clade E, member 2	protein-coding	no	no	694.448	yes
Tapbpl	NM_145391	chr6	125224212	125231860	-	2060	1	Tapbpl||Tapbpl|NM_145391|	124.53	128.84	142.31	173.23	159.27	0.319409	0.0224689	0.790923	Mm.296902	NM_145391	ENSMUSG00000038213	BC017613|TAPBPL-R|Tapbplr	-	6|6 F2	TAP binding protein-like	protein-coding	no	no	145.636	yes
Sirpa	NM_001291019	chr2	129593169	129632228	+	4015	1	Sirpa||Sirpa|NM_001291019|	3246.15	3234.13	2669.94	2398.83	2646.15	-0.290363	0.0226185	0.792163	Mm.1682	NM_007547	ENSMUSG00000037902	AI835480|Bit|CD172a|P84|Ptpns1|SHP-1|SHPS-1|SIRP	-	2 F1|2 63.19 cM	signal-regulatory protein alpha	protein-coding	no	no	2839.04	yes
Pdp2	NM_001024606	chr8	104591472	104599025	+	5667	1	Pdp2||Pdp2|NM_001024606|	290.16	227.86	261.67	331.96	311.09	0.295548	0.0227466	0.792163	Mm.290750	NM_001024606	ENSMUSG00000048371	4833426J09Rik|Gm1705|mKIAA1348	-	8|8 D3	pyruvate dehyrogenase phosphatase catalytic subunit 2	protein-coding	no	no	284.548	yes
St8sia4	NM_009183	chr1	95587682	95667594	-	5404	1	St8sia4||St8sia4|NM_009183|	177.72	190.87	141.39	256.01	194.67	0.401749	0.0225841	0.792163	Mm.306228	NM_009183	ENSMUSG00000040710	PST|PST-1|SIAT8-D|ST8SiaIV|Siat8d	-	1|1 D	ST8 alpha-N-acetyl-neuraminide alpha-2,8-sialyltransferase 4	protein-coding	no	no	192.132	yes
Selenop	NM_001042613	chr15	3270767	3280510	+	2006	1	Selenop||Selenop|NM_001042613|	1603.13	1611.7	1288.14	1203.26	1268.59	-0.295906	0.0227463	0.792163	Mm.392203	NM_009155	ENSMUSG00000064373	AU018766|D15Ucla1|Se-P|Sepp1|selp	-	15 A1|15 1.84 cM	selenoprotein P	protein-coding	no	no	1394.96	yes
Ptms	NM_026988	chr6	124913675	124917946	-	1146	1	Ptms||Ptms|NM_026988|	639.56	583.36	545.37	465.94	519.73	-0.271255	0.0226556	0.792163	Mm.142187	NM_026988	ENSMUSG00000030122	2610009E16Rik	-	6|6 F2	parathymosin	protein-coding	no	no	550.792	yes
Gm15708	NR_040432	chr5	144277061	144280514	+	1761	1	Gm15708||Gm15708|NR_040432|	58.03	145.54	157.92	193.72	175.11	0.601989	0.0228048	0.792163	Mm.441035	NR_040432	ENSMUSG00000086894	-	-	5 G2|5 83.27 cM	predicted gene 15708	ncRNA	no	no	146.064	yes
Smndc1	NM_172429	chr19	53379214	53390634	-	2175	1	Smndc1||Smndc1|NM_172429|	234.55	238.59	259.83	194.57	211.43	-0.282785	0.0228595	0.792514	Mm.313687	NM_172429	ENSMUSG00000025024	-	-	19|19 D2	survival motor neuron domain containing 1	protein-coding	no	no	227.794	yes
Ggnbp1	NM_027544	chr17	27029259	27036378	+	1514	1	Ggnbp1||Ggnbp1|NM_027544|	73.75	91.86	84.47	33.28	74.51	-0.649585	0.0229381	0.794148	Mm.440437	NM_027544	ENSMUSG00000048731	0610031G08Rik|mdf	-	17|17 A3.3	gametogenetin binding protein 1	protein-coding	no	no	71.574	yes
Fbxo17	NM_015796	chr7	28716790	28738140	+	1955	1	Fbxo17||Fbxo17|NM_015796|	31.43	46.53	40.4	17.07	30.74	-0.743126	0.0230851	0.795851	Mm.358659	NM_015796	ENSMUSG00000030598	Fbg4|Fbx17|Fbxo26	-	7|7 B1	F-box protein 17	protein-coding	no	no	33.234	yes
Stx2	NM_001359022	chr5	128984558	128990236	-	2960	1	Stx2||Stx2|NM_001359022|	440.07	518.94	514.16	378.9	446.15	-0.265676	0.0232366	0.795851	Mm.260716	NM_007941	ENSMUSG00000029428	AW538950|Epim|G1-536-1|Syn-2|repro34	-	5 G1.3|5 67.99 cM	syntaxin 2	protein-coding	no	no	459.644	yes
Gm20517	NR_157366	chr17	47611585	47686739	+	7696	1	Gm20517||Gm20517|NR_157366|	130.57	178.94	158.84	199.69	195.6	0.328723	0.0231257	0.795851	Mm.59393	NM_001364933		Med20|Trfp	-	17|17 23.66 cM	predicted gene 20517	protein-coding	no	no	172.728	yes
Itm2b	NM_008410	chr14	73362226	73385289	-	1785	1	Itm2b||Itm2b|NM_008410|	1246.47	1212.05	1031.98	930.18	1008.72	-0.27799	0.0233035	0.795882	Mm.4266	NM_008410	ENSMUSG00000022108	AI256040|Bri|Bri2|Bricd2b|D14Sel6|E25BMM|imBRI2	-	14 D3|14 38.88 cM	integral membrane protein 2B	protein-coding	no	no	1085.88	yes
Kcnip3	NM_001111331	chr2	127456498	127482499	-	2913	1	Kcnip3||Kcnip3|NM_001111331|	189.81	195.65	195.56	251.75	224.47	0.28838	0.023417	0.796005	Mm.315292	NM_019789	ENSMUSG00000079056	4933407H12Rik|AI413860|Csen|DREAM|KChIP3|R74849	-	2|2 F1	Kv channel interacting protein 3, calsenilin	protein-coding	no	no	211.448	yes
Csad	NM_001359126	chr15	102176998	102205052	-	3318	1	Csad||Csad|NM_001359126|	258.73	331.64	307.58	228.7	261.73	-0.301339	0.0234916	0.796913	Mm.296382	NM_144942	ENSMUSG00000023044	Csd	-	15|15 F2	cysteine sulfinic acid decarboxylase	protein-coding	no	no	277.676	yes
Abhd1	NR_003522	chr5	30950066	30955095	+	1339	1	Abhd1||Abhd1|NR_003522|	36.27	34.6	35.81	55.47	50.3	0.562913	0.0239212	0.808229	Mm.389615	NM_021304	ENSMUSG00000006638	LABH-1|LABH1	-	5|5 B1	abhydrolase domain containing 1	protein-coding	no	no	42.49	yes
Gpr65	NM_008152	chr12	98268635	98276722	+	2144	1	Gpr65||Gpr65|NM_008152|	118.48	100.21	137.72	185.18	133.19	0.407646	0.0241471	0.812554	Mm.378924	NM_008152	ENSMUSG00000021886	Dig1|Gpcr25|TDAG8	-	12|12 E	G-protein coupled receptor 65	protein-coding	no	no	134.956	yes
Pex6	NR_157369	chr17	46711476	46725543	+	3341	1	Pex6||Pex6|NR_157369|	326.43	359.08	396.63	236.38	340.9	-0.338153	0.0241138	0.812554	Mm.299399	NM_145488	ENSMUSG00000002763	AI132582|D130055I09Rik|PAF-2	-	17|17 C	peroxisomal biogenesis factor 6	protein-coding	no	no	331.884	yes
Dhrs3	NM_001357276	chr4	144893077	144928209	+	2481	1	Dhrs3||Dhrs3|NM_001357276|	657.69	621.53	603.21	540.19	530.91	-0.240241	0.0243843	0.812554	Mm.14063	NM_011303	ENSMUSG00000066026	Rsdr1|retSDR1	-	4|4 E1	dehydrogenase/reductase (SDR family) member 3	protein-coding	no	no	590.706	yes
Arl8b	NM_026011	chr6	108783059	108823723	+	2915	1	Arl8b||Arl8b|NM_026011|	685.5	703.85	644.53	557.25	598.9	-0.242378	0.0243436	0.812554	Mm.271178	NM_026011	ENSMUSG00000030105	2610313E07Rik|3100002J04Rik|Arl10c|gie1	-	6|6 E2	ADP-ribosylation factor-like 8B	protein-coding	no	no	638.006	yes
Gla	NM_013463	chrX	134588169	134601005	-	3019	1	Gla||Gla|NM_013463|	145.08	79.93	105.59	135.69	177.9	0.493903	0.024268	0.812554	Mm.1114	NM_013463	ENSMUSG00000031266	Ags	-	X E3|X 56.2 cM	galactosidase, alpha	protein-coding	no	no	128.838	yes
Tmsb4x	NM_021278	chrX	167207094	167209218	-	665	1	Tmsb4x||Tmsb4x|NM_021278|	442.49	452.13	358.99	322.57	358.59	-0.30667	0.0241838	0.812554	Mm.142729	NM_021278	ENSMUSG00000049775	Ptmb4|Tb4|Tbeta4	-	X F5|X 78.28 cM	thymosin, beta 4, X chromosome	protein-coding	no	no	386.954	yes
Atp6v1g2	NM_023179	chr17	35236596	35238768	+	1490	1	Atp6v1g2||Atp6v1g2|NM_023179|	41.11	85.89	87.22	168.97	71.72	0.744293	0.0242053	0.812554	Mm.396107	NM_023179	ENSMUSG00000024403	1500002D01Rik|Atp6g2|NG38|VAG2	-	17|17 B1	ATPase, H+ transporting, lysosomal V1 subunit G2	protein-coding	no	no	90.982	yes
Mbip	NM_145442	chr12	56328307	56345894	-	1491	1	Mbip||Mbip|NM_145442|	106.39	99.02	103.75	76.8	81.96	-0.387775	0.0243826	0.812554	Mm.25656	NM_145442	ENSMUSG00000021028	4933408E06Rik	-	12|12 C1	MAP3K12 binding inhibitory protein 1	protein-coding	no	no	93.584	yes
Ccl3	NM_011337	chr11	83647843	83649378	-	785	1	Ccl3||Ccl3|NM_011337|	548.88	485.54	387.45	360.98	393.99	-0.342024	0.0244033	0.812554	Mm.1282	NM_011337	ENSMUSG00000000982	AI323804|G0S19-1|LD78alpha|MIP-1alpha|MIP1-(a)|MIP1-alpha|Mip1a|Scya3	-	11 C|11 51.04 cM	chemokine (C-C motif) ligand 3	protein-coding	no	no	435.368	yes
Mapk6	NM_015806	chr9	75386782	75410016	-	4194	1	Mapk6||Mapk6|NM_015806|	455.79	398.45	433.36	495.81	531.84	0.246525	0.0242164	0.812554	Mm.480076	NM_015806	ENSMUSG00000042688	2610021I23Rik|D130053K17Rik|Erk3|Mapk4|Mapk63|Prkm4|Prkm6	-	9 D|9 42.3 cM	mitogen-activated protein kinase 6	protein-coding	no	no	463.05	yes
Bend3	NM_001359600	chr10	43493165	43515417	+	6111	1	Bend3||Bend3|NM_001359600|	99.14	125.26	112.01	153.61	135.06	0.355598	0.0251035	0.81529	Mm.490388	NM_199028	ENSMUSG00000038214	mKIAA1553	-	10|10 B2	BEN domain containing 3	protein-coding	no	no	125.016	yes
Selplg	NM_009151	chr5	113817798	113830501	-	2601	1	Selplg||Selplg|NM_009151|	1788.1	1744.12	1406.58	1310.78	1398.99	-0.297087	0.0245874	0.81529	Mm.332590	NM_009151	ENSMUSG00000048163	CD162|Psgl-1|Psgl1|Selp1|Selpl	-	5 F|5 55.59 cM	selectin, platelet (p-selectin) ligand	protein-coding	no	no	1529.71	yes
Gnptab	NM_001004164	chr10	88379268	88447323	+	5301	1	Gnptab||Gnptab|NM_001004164|	227.29	218.31	215.76	327.7	234.72	0.342797	0.0249853	0.81529	Mm.335190	NM_001004164	ENSMUSG00000035311	EG432486	-	10|10 C1	N-acetylglucosamine-1-phosphate transferase, alpha and beta subunits	protein-coding	no	no	244.756	yes
Gab3	NM_181584	chrX	74988545	75084905	-	2110	1	Gab3||Gab3|NM_181584|	18.13	28.63	26.63	37.55	40.05	0.643643	0.0250592	0.81529	Mm.267056	NM_181584	ENSMUSG00000032750	5930433H21Rik	-	X|X A7.3	growth factor receptor bound protein 2-associated protein 3	protein-coding	no	no	30.198	yes
Apbb3	NM_001357512	chr18	36671154	36679366	-	2047	1	Apbb3||Apbb3|NM_001357512|	142.66	157.47	153.33	196.28	179.76	0.30486	0.0246674	0.81529	Mm.89673	NM_146085	ENSMUSG00000117679	Fe65l2|Rirl2|TR2S	-	18|18 B2	amyloid beta (A4) precursor protein-binding, family B, member 3	protein-coding	no	no	165.9	yes
Cyp4f16	NM_024442	chr17	32536557	32551798	+	2215	1	Cyp4f16||Cyp4f16|NM_024442|	36.27	39.37	39.48	72.54	45.64	0.615501	0.0248958	0.81529	Mm.30504	NM_024442	ENSMUSG00000048440	2310021J05Rik|AI746515	-	17|17 B1	cytochrome P450, family 4, subfamily f, polypeptide 16	protein-coding	no	no	46.66	yes
Rsu1	NM_009105	chr2	13076967	13271415	-	1574	1	Rsu1||Rsu1|NM_009105|	181.35	188.49	182.71	133.98	163	-0.324308	0.0250948	0.81529	Mm.905	NM_009105	ENSMUSG00000026727	RsuI|rsp-1	-	2|2 A1	Ras suppressor protein 1	protein-coding	no	no	169.906	yes
Uap1l1	NM_001033293	chr2	25361490	25365663	-	1712	1	Uap1l1||Uap1l1|NM_001033293|	182.56	130.03	143.23	188.6	205.84	0.365716	0.0248358	0.81529	Mm.33797	NM_001033293	ENSMUSG00000026956	5730445F03Rik	-	2|2 A3	UDP-N-acteylglucosamine pyrophosphorylase 1-like 1	protein-coding	no	no	170.052	yes
Rhob	NM_007483	chr12	8497661	8500009	-	2348	1	Rhob||Rhob|NM_007483|	2525.59	2413.37	1952.87	1780.14	1980.19	-0.306013	0.0249263	0.81529	Mm.687	NM_007483	ENSMUSG00000054364	AA017882|Arh6|Arhb	-	12|12 A1.1	ras homolog family member B	protein-coding	no	no	2130.43	yes
Chd7	NM_001277149	chr4	8690406	8868449	+	11231	1	Chd7||Chd7|NM_001277149|	1190.86	1142.86	1241.32	1395.26	1398.99	0.216455	0.0247498	0.81529	Mm.138792	NM_001033395	ENSMUSG00000041235	A730019I05Rik|Cycn|Cyn|Dz|Edy|Flo|GENA 47|GENA 60|Gena 52|Lda|Mt|Obt|Todo|WBE1|Whi|metis	-	4 A1|4 3.68 cM	chromodomain helicase DNA binding protein 7	protein-coding	no	no	1273.86	yes
Afap1l1	NM_178928	chr18	61730262	61786662	-	3366	1	Afap1l1||Afap1l1|NM_178928|	284.11	289.89	308.49	370.36	336.24	0.252132	0.0249388	0.81529	Mm.26632	NM_178928	ENSMUSG00000033032	AI173486	-	18|18 E1	actin filament associated protein 1-like 1	protein-coding	no	no	317.818	yes
0610010K14Rik	NM_001177601	chr11	70235204	70237914	-	875	1	0610010K14Rik||0610010K14Rik|NM_001177601|	141.45	161.05	169.85	115.21	135.99	-0.344103	0.0246336	0.81529	Mm.30016	NM_026757	ENSMUSG00000020831	1110020A23Rik|AL033328|AU045833|Bap18	-	11|11 B3	RIKEN cDNA 0610010K14 gene	protein-coding	no	no	144.71	yes
Zrsr2	NM_178794	chrX	163950386	163958666	-	3926	1	Zrsr2||Zrsr2|NM_178794|	85.84	94.24	104.67	121.18	124.81	0.354748	0.0248645	0.81529	Mm.426178	NM_009453	ENSMUSG00000031370	35kDa|5031411E02Rik|A230052C13Rik|C77286|U2af1-rs2|URP	-	X F5|X 75.99 cM	zinc finger (CCCH type), RNA binding motif and serine/arginine rich 2	protein-coding	no	no	106.148	yes
Kdm2a	NM_001001984	chr19	4316147	4397077	-	7224	1	Kdm2a||Kdm2a|NM_001001984|	1015.56	1012.83	1048.51	1276.65	1144.71	0.227085	0.0249917	0.81529	Mm.31941	NM_001001984	ENSMUSG00000054611	100043628|5530401A10Rik|AA589516|AW536790|Cxxc8|Fbl11|Fbl7|Fbxl11|Gm4560|Jhdm1|Jhdm1a|lalina	-	19|19 A	lysine (K)-specific demethylase 2A	protein-coding	no	no	1099.65	yes
Paox	NM_153783	chr7	140125685	140134334	+	1724	1	Paox||Paox|NM_153783|	35.06	42.95	41.32	23.89	27.94	-0.632118	0.0249255	0.81529	Mm.486735	NM_153783	ENSMUSG00000025464	2410012F02Rik|AI118225|Pao	-	7|7 F4	polyamine oxidase (exo-N4-amino)	protein-coding	no	no	34.232	yes
Ccdc134	NM_001326588	chr15	82127922	82142202	+	2040	1	Ccdc134||Ccdc134|NM_001326588|	111.23	100.21	123.03	139.95	145.3	0.336603	0.0251829	0.815907	Mm.440373	NM_172428	ENSMUSG00000068114	2310042L06Rik|AW208859	-	15|15 E1	coiled-coil domain containing 134	protein-coding	no	no	123.944	yes
Tmx2	NM_025868	chr2	84671311	84678828	-	2270	1	Tmx2||Tmx2|NM_025868|	79.79	87.09	98.24	67.42	66.13	-0.421466	0.0252876	0.818248	Mm.371621	NM_025868	ENSMUSG00000050043	2310042M24Rik|AA589631|Txndc14	-	2|2 D	thioredoxin-related transmembrane protein 2	protein-coding	no	no	79.734	yes
Mtor	NM_020009	chr4	148448582	148557685	+	8480	1	Mtor||Mtor|NM_020009|	247.84	194.45	201.07	299.53	245.89	0.338166	0.0253708	0.81884	Mm.21158	NM_020009	ENSMUSG00000028991	2610315D21Rik|AI327068|FRAP|FRAP2|Frap1|RAFT1|RAPT1|flat	-	4 E2|4 78.76 cM	mechanistic target of rapamycin kinase	protein-coding	no	no	237.756	yes
Bbs12	NM_001008502	chr3	37312554	37321451	+	2431	1	Bbs12||Bbs12|NM_001008502|	41.11	71.58	68.86	128.01	63.34	0.651013	0.0253702	0.81884	Mm.32171	NM_001008502	ENSMUSG00000051444	Gm1805|Gm407|Gm721	-	3|3 B	Bardet-Biedl syndrome 12 (human)	protein-coding	no	no	74.58	yes
Plekhn1	NM_001008233	chr4	156221456	156228542	-	2179	1	Plekhn1||Plekhn1|NM_001008233|	108.81	128.84	123.95	84.48	102.46	-0.382396	0.0254416	0.818894	Mm.423124	NM_001008233	ENSMUSG00000078485	BC025458|Clpabp	-	4|4 E2	pleckstrin homology domain containing, family N member 1	protein-coding	no	no	109.708	yes
C1galt1c1	NM_021550	chrX	38630783	38635143	-	1504	1	C1galt1c1||C1galt1c1|NM_021550|	106.39	99.02	119.36	149.34	129.47	0.349563	0.0256489	0.823605	Mm.441410	NM_021550	ENSMUSG00000048970	1500002I11Rik|AB030184|C1GalT2|C81205|Cosmc	-	X|X A3.3	C1GALT1-specific chaperone 1	protein-coding	no	no	120.716	yes
Wdr46	NM_020603	chr17	33940723	33949695	+	2135	1	Wdr46||Wdr46|NM_020603|	90.67	62.03	84.47	116.91	98.73	0.434807	0.0257892	0.82496	Mm.2437	NM_020603	ENSMUSG00000024312	2310007I04Rik|Bing4|C78447|C78559	-	17|17 B1	WD repeat domain 46	protein-coding	no	no	90.562	yes
Dusp22	NM_001037955	chr13	30660059	30711232	+	3045	1	Dusp22||Dusp22|NM_001037955|	154.75	207.58	184.55	123.74	161.13	-0.370875	0.0257609	0.82496	Mm.289646	NM_134068	ENSMUSG00000069255	JKAP|JSP1|LMW-DSP2|MKPX	-	13|13 A3.2	dual specificity phosphatase 22	protein-coding	no	no	166.35	yes
Capns1	NM_009795	chr7	30186934	30195153	-	1522	1	Capns1||Capns1|NM_009795|	282.91	345.96	291.97	250.89	257.07	-0.283188	0.0260871	0.826205	Mm.439782	NM_009795	ENSMUSG00000001794	Capa-4|Capa4|Capn4|Cdps|Css1|D7Ertd146e	-	7 B1|7 17.31 cM	calpain, small subunit 1	protein-coding	no	no	285.76	yes
Anxa3	NM_013470	chr5	96793385	96845968	+	1572	1	Anxa3||Anxa3|NM_013470|	405.01	410.38	374.6	324.28	344.62	-0.25687	0.0259289	0.826205	Mm.7214	NM_013470	ENSMUSG00000029484	Anx3	-	5 E3|5 47.29 cM	annexin A3	protein-coding	no	no	371.778	yes
Cd68	NM_001291058	chr11	69664213	69666170	-	1236	1	Cd68||Cd68|NM_001291058|	700.01	713.39	624.33	547.01	600.76	-0.255941	0.0260648	0.826205	Mm.15819	NM_009853	ENSMUSG00000018774	Lamp4|Scard1|gp110	-	11 B3|11 42.86 cM	CD68 antigen	protein-coding	no	no	637.1	yes
Slco1c1	NR_149743	chr6	141524354	141570177	+	3140	1	Slco1c1||Slco1c1|NR_149743|	8.46	16.7	22.95	26.45	30.74	0.78244	0.025871	0.826205	Mm.284495	NM_021471	ENSMUSG00000030235	OATP-14|OATP-F|Oatp2|Oatpf|Slc21a14	-	6|6 G2	solute carrier organic anion transporter family, member 1c1	protein-coding	no	no	21.06	yes
Hcar2	NM_030701	chr5	123863570	123865516	-	1946	1	Hcar2||Hcar2|NM_030701|	181.35	151.51	121.19	98.14	125.74	-0.445462	0.0259536	0.826205	Mm.440567	NM_030701	ENSMUSG00000045502	Gpr109a|Gpr109b|HM74|Niacr1|PUMA-G|Pumag|mHM74b	-	5|5 F	hydroxycarboxylic acid receptor 2	protein-coding	no	no	135.586	yes
Psap	NM_001146121	chr10	60277628	60302600	+	2630	1	Psap||Psap|NM_001146121|	1552.35	1584.26	1288.14	1198.14	1260.2	-0.278066	0.02609	0.826205	Mm.29978	NM_011179	ENSMUSG00000004207	AI037048|SGP-1	-	10 B4|10 30.02 cM	prosaposin	protein-coding	no	no	1376.62	yes
Pou2f1	NM_001368808	chr1	165865154	165953071	-	13163	1	Pou2f1||Pou2f1|NM_001368808|	603.29	644.2	605.05	814.12	672.48	0.25656	0.0261529	0.826436	Mm.245261	NM_011137	ENSMUSG00000026565	2810482H01Rik|NF-A1|Oct-1|Oct1|Otf-1|Otf1	-	1 H2.3|1 73.21 cM	POU domain, class 2, transcription factor 1	protein-coding	no	no	667.828	yes
LOC114841036	NM_001370419	chr19	6977585	6980440	-	1831	1	LOC114841036||LOC114841036|NM_001370419|	68.91	70.38	79.88	90.46	106.18	0.407704	0.0262823	0.828631		NM_001370419		-	-	-	Uncharacterized protein LOC114841036	protein-coding	no	no	83.162	yes
Parvg	NM_022321	chr15	84324720	84342978	+	2630	1	Parvg||Parvg|NM_022321|	754.41	808.83	718.9	588.83	695.77	-0.257711	0.0263122	0.828631	Mm.251356	NM_022321	ENSMUSG00000022439	AI413459	-	15|15 E2	parvin, gamma	protein-coding	no	no	713.348	yes
B2m	NM_009735	chr2	122147687	122153082	+	851	1	B2m||B2m|NM_009735|	609.33	582.17	497.63	448.87	488.06	-0.277891	0.0264288	0.830371	Mm.163	NM_009735	ENSMUSG00000060802	Ly-m11|beta2-m|beta2m	-	2 E5|2 60.55 cM	beta-2 microglobulin	protein-coding	no	no	525.212	yes
Ccl24	NM_019577	chr5	135569935	135573049	-	1292	1	Ccl24||Ccl24|NM_019577|	14.51	13.12	25.71	36.7	26.08	0.777927	0.0264518	0.830371	Mm.31505	NM_019577	ENSMUSG00000004814	CKb-6|MPIF-2|Scya24	-	5|5 G2	chemokine (C-C motif) ligand 24	protein-coding	no	no	23.224	yes
Coa7	NM_027250	chr4	108328152	108340718	+	2871	1	Coa7||Coa7|NM_027250|	27.81	32.21	30.3	46.08	44.71	0.58106	0.0265142	0.831293	Mm.28354	NM_027250	ENSMUSG00000048351	2010305A19Rik|AI451324|D4Ertd796e|Selrc1	-	4 C7|4 50.44 cM	cytochrome c oxidase assembly factor 7	protein-coding	no	no	36.222	yes
Tnk2	NM_016788	chr16	32644643	32683493	+	4423	1	Tnk2||Tnk2|NM_016788|	20.55	42.95	43.15	59.74	51.23	0.619301	0.0266783	0.834366	Mm.251115	NM_016788	ENSMUSG00000022791	Ack|Ack-1|Ack1|Cdgip|Pyk1	-	16|16 B3	tyrosine kinase, non-receptor, 2	protein-coding	no	no	43.524	yes
Zfp579	NM_026741	chr7	4992852	4996101	-	2156	1	Zfp579||Zfp579|NM_026741|	344.56	481.96	515.99	328.55	389.33	-0.331737	0.0266567	0.834366	Mm.76400	NM_026741	ENSMUSG00000051550	1110003A17Rik|Znf579	-	7|7 A1	zinc finger protein 579	protein-coding	no	no	412.078	yes
Snrk	NM_001357774	chr9	122117266	122169702	+	5041	1	Snrk||Snrk|NM_001357774|	232.13	246.94	287.38	302.09	318.54	0.262881	0.0267458	0.834824	Mm.257989	NM_133741	ENSMUSG00000038145	2010012F07Rik|AI448042|AW547029|E030034B15|R74830|mKIAA0096	-	9|9 F4	SNF related kinase	protein-coding	no	no	277.416	yes
Prepl	NM_001163622	chr17	85063477	85090267	-	3801	1	Prepl||Prepl|NM_001163622|	112.44	128.84	143.23	178.35	149.03	0.337811	0.0267591	0.834824	Mm.259035	NM_145984	ENSMUSG00000024127	2810457N15Rik|9530014L06Rik|D030028O16Rik|mKIAA0436	-	17|17 E4	prolyl endopeptidase-like	protein-coding	no	no	142.378	yes
Arhgap35	NM_172739	chr7	16494473	16614993	-	8380	1	Arhgap35||Arhgap35|NM_172739|	284.11	291.08	270.85	380.6	311.09	0.286083	0.0268421	0.83638	Mm.28646	NM_172739	ENSMUSG00000058230	6430596G11Rik|AI841135|Grlf1|mKIAA1722|p190A|p190RhoGAP	-	7|7 A2	Rho GTPase activating protein 35	protein-coding	no	no	307.546	yes
Tssc4	NM_020285	chr7	143069368	143071087	+	1389	1	Tssc4||Tssc4|NM_020285|	211.57	212.35	321.35	314.89	320.41	0.336797	0.0268869	0.836744	Mm.139675	NM_020285	ENSMUSG00000045752	AA241958|ESTM671070	-	7 F5|7 88.11 cM	tumor-suppressing subchromosomal transferable fragment 4	protein-coding	no	no	276.114	yes
Cnot3	NM_146176	chr7	3645269	3661109	+	2870	1	Cnot3||Cnot3|NM_146176|	269.61	285.12	298.39	218.46	257.07	-0.273809	0.0272792	0.84514	Mm.358731	NM_146176	ENSMUSG00000035632	A930039N10Rik	-	7|7 A1	CCR4-NOT transcription complex, subunit 3	protein-coding	no	no	265.73	yes
Mterf3	NM_025547	chr13	66912095	66933072	-	1471	1	Mterf3||Mterf3|NM_025547|	134.2	145.54	151.49	120.33	110.84	-0.326557	0.0272715	0.84514	Mm.347939	NM_025547	ENSMUSG00000021519	2410017I18Rik|Mterfd1	-	13|13 B3	mitochondrial transcription termination factor 3	protein-coding	no	no	132.48	yes
Marcks	NM_008538	chr10	37133243	37138926	-	4183	1	Marcks||Marcks|NM_008538|	2803.66	2765.29	2332.98	2154.77	2262.41	-0.269959	0.0272907	0.84514	Mm.30059	NM_008538	ENSMUSG00000069662	Macs|PKCSL	-	10 B1|10 19.49 cM	myristoylated alanine rich protein kinase C substrate	protein-coding	no	no	2463.82	yes
Rtn3	NM_001003933	chr19	7425895	7483291	-	4966	1	Rtn3||Rtn3|NM_001003933|	947.85	1016.41	965.88	828.63	861.56	-0.22154	0.0275292	0.849332	Mm.246990	NM_053076	ENSMUSG00000024758	RTN3-A1	-	19|19 A	reticulon 3	protein-coding	no	no	924.066	yes
Fkbp2	NM_001360288	chr19	6977737	6979392	-	667	1	Fkbp2||Fkbp2|NM_001360288|	59.24	59.65	65.19	77.66	90.35	0.434723	0.0277536	0.849332	Mm.4234	NM_008020	ENSMUSG00000056629	mFKBP13|mFKBP2	-	19|19 A	FK506 binding protein 2	protein-coding	no	no	70.418	yes
Dicer1	NM_148948	chr12	104687742	104751952	-	9798	1	Dicer1||Dicer1|NM_148948|	494.48	576.2	589.44	669.04	640.81	0.230408	0.0277625	0.849332	Mm.21135	NM_148948	ENSMUSG00000041415	1110006F08Rik|D12Ertd7e|mKIAA0928	-	12 E|12 54.83 cM	dicer 1, ribonuclease type III	protein-coding	no	no	593.994	yes
Araf	NM_009703	chrX	20848543	20860521	+	2329	1	Araf||Araf|NM_009703|	234.55	310.17	289.21	191.16	253.34	-0.338016	0.0277453	0.849332	Mm.220946	NM_009703	ENSMUSG00000001127	1200013E08Rik|A-Raf|AW495444|Araf1	-	X A1.3|X 16.3 cM	Araf proto-oncogene, serine/threonine kinase	protein-coding	no	no	255.686	yes
Plagl2	NM_018807	chr2	153227769	153241358	-	5402	1	Plagl2||Plagl2|NM_018807|	610.54	571.43	617.9	754.38	668.76	0.234182	0.0275122	0.849332	Mm.103199	NM_018807	ENSMUSG00000051413	AU018672|AW552839|mKIAA0198	-	2|2 H1	pleiomorphic adenoma gene-like 2	protein-coding	no	no	644.602	yes
Adtrp	NM_175417	chr13	41763148	41847488	-	2427	1	Adtrp||Adtrp|NM_175417|	16.93	31.02	28.46	6.83	19.56	-0.976174	0.0276326	0.849332	Mm.25195	NM_175417	ENSMUSG00000058022	9530008L14Rik	-	13|13 A4	androgen dependent TFPI regulating protein	protein-coding	no	no	20.56	yes
Acad12	NM_178799	chr5	121598281	121618938	-	2354	1	Acad12||Acad12|NM_178799|	41.11	42.95	46.82	19.63	36.33	-0.665276	0.0277302	0.849332	Mm.482918	NM_178799	ENSMUSG00000042647	9330129D05Rik	-	5|5 F	acyl-Coenzyme A dehydrogenase family, member 12	protein-coding	no	no	37.368	yes
Rictor	NM_030168	chr15	6708381	6800400	+	9238	1	Rictor||Rictor|NM_030168|	460.63	487.92	426.93	619.55	500.17	0.278294	0.0277515	0.849332	Mm.275811	NM_030168	ENSMUSG00000050310	4921505C17Rik|6030405M08Rik|AVO3|AW492497|D530039E11Rik	-	15|15 A1	RPTOR independent companion of MTOR, complex 2	protein-coding	no	no	499.04	yes
Dmtf1	NR_152858	chr5	9118868	9161776	-	4160	1	Dmtf1||Dmtf1|NR_152858|	454.58	442.59	475.59	553.84	524.39	0.224146	0.0276175	0.849332	Mm.22480	NM_011806	ENSMUSG00000042508	Dimp|Dmp1	-	5|5 A1	cyclin D binding myb-like transcription factor 1	protein-coding	no	no	490.198	yes
Idh2	NM_173011	chr7	80094847	80115350	-	1681	1	Idh2||Idh2|NM_173011|	258.73	272	294.72	192.01	257.07	-0.310485	0.0276814	0.849332	Mm.246432	NM_173011	ENSMUSG00000030541	E430004F23|IDPm|Idh-2	-	7 D2|7 45.43 cM	isocitrate dehydrogenase 2 (NADP+), mitochondrial	protein-coding	no	no	254.906	yes
Itga5	NM_001314041	chr15	103344286	103366791	-	4397	1	Itga5||Itga5|NM_001314041|	227.29	246.94	288.29	321.72	297.12	0.267748	0.0282248	0.852112	Mm.16234	NM_010577	ENSMUSG00000000555	Cd49e|Fnra|VLA5	-	15 F3|15 58.9 cM	integrin alpha 5 (fibronectin receptor alpha)	protein-coding	no	no	276.272	yes
Ndfip1	NM_001355749	chr18	38418907	38465197	+	1797	1	Ndfip1||Ndfip1|NM_001355749|	413.48	433.05	401.22	354.15	354.87	-0.240857	0.0281255	0.852112	Mm.102496	NM_022996	ENSMUSG00000024425	0610010M22Rik|N4wbp5	-	18|18 B3	Nedd4 family interacting protein 1	protein-coding	no	no	391.354	yes
App	NM_001198823	chr16	84954436	85173707	-	3322	1	App||App|NM_001198823|	681.87	634.66	623.41	527.38	577.48	-0.240175	0.0282204	0.852112	Mm.277585	NM_007471	ENSMUSG00000022892	Abeta|Abpp|Adap|Ag|Cvap|E030013M08Rik|betaApp	-	16 C3.3|16 46.92 cM	amyloid beta (A4) precursor protein	protein-coding	no	no	608.96	yes
Dusp10	NM_022019	chr1	184034381	184075636	+	2785	1	Dusp10||Dusp10|NM_022019|	33.85	38.17	62.43	62.3	71.72	0.544085	0.0282128	0.852112	Mm.404024	NM_022019	ENSMUSG00000039384	2610306G15Rik|AI158871|MKP-5|MKP5	-	1|1 H5	dual specificity phosphatase 10	protein-coding	no	no	53.694	yes
Clptm1l	NM_146047	chr13	73604002	73620639	+	2345	1	Clptm1l||Clptm1l|NM_146047|	332.47	323.29	342.46	281.61	285.01	-0.244561	0.0279894	0.852112	Mm.30099	NM_146047	ENSMUSG00000021610	C130052I12Rik|Crr9	-	13|13 C1	CLPTM1-like	protein-coding	no	no	312.968	yes
Lrig3	NM_177152	chr10	125966219	126015359	+	4013	1	Lrig3||Lrig3|NM_177152|	108.81	107.37	119.36	134.83	148.1	0.321741	0.0280646	0.852112	Mm.275586	NM_177152	ENSMUSG00000020105	9030421L11Rik|9130004I02Rik|9430095K15Rik|mKIAA3016	-	10|10 D3	leucine-rich repeats and immunoglobulin-like domains 3	protein-coding	no	no	123.694	yes
Adgre1	NM_010130	chr17	57358686	57483529	+	3202	1	Adgre1||Adgre1|NM_010130|	993.79	971.07	867.64	763.77	837.34	-0.251853	0.0281248	0.852112	Mm.2254	NM_010130	ENSMUSG00000004730	DD7A5-7|EGF-TM7|Emr1|F4/80|Gpf480|Ly71|TM7LN3	-	17 D|17 29.8 cM	adhesion G protein-coupled receptor E1	protein-coding	no	no	886.722	yes
Hspa12a	NM_001327998	chr19	58795750	58943672	-	5882	1	Hspa12a||Hspa12a|NM_001327998|	74.96	114.52	85.39	35.84	81.03	-0.666607	0.0281022	0.852112	Mm.39739	NM_175199	ENSMUSG00000025092	1700063D12Rik|AI118035|AI840429|AW048913|AW556406|D5Mgi40|Gm19925|mKIAA0417	-	19|19 D2	heat shock protein 12A	protein-coding	no	no	78.348	yes
Nrm	NM_134122	chr17	35861318	35865400	+	1457	1	Nrm||Nrm|NM_134122|	238.17	318.52	293.8	229.56	236.58	-0.295172	0.0279422	0.852112	Mm.390992	NM_134122	ENSMUSG00000059791	2610307M02Rik|AI429796	-	17|17 B1	nurim (nuclear envelope membrane protein)	protein-coding	no	no	263.326	yes
Sypl	NM_013635	chr12	32953945	32979502	+	4576	1	Sypl||Sypl|NM_013635|	402.6	478.38	444.38	372.92	379.09	-0.244363	0.0282097	0.852112	Mm.246304	NM_013635	ENSMUSG00000020570	AI314763|AI604763|D12Ertd446e|PanI|Pphn|Sypl1	-	12 A3|12 13.87 cM	synaptophysin-like protein	protein-coding	no	no	415.474	yes
Ppp2ca	NM_019411	chr11	52098824	52122749	+	1917	1	Ppp2ca||Ppp2ca|NM_019411|	444.91	407.99	397.55	340.5	364.18	-0.254015	0.0282833	0.852857	Mm.260288	NM_019411	ENSMUSG00000020349	PP2A|R75353	-	11|11 B1.3	protein phosphatase 2 (formerly 2A), catalytic subunit, alpha isoform	protein-coding	no	no	391.026	yes
Rbbp6	NM_011247	chr7	122970564	123002572	+	6164	1	Rbbp6||Rbbp6|NM_011247|	622.63	749.18	734.51	899.46	780.53	0.247253	0.0283961	0.854218	Mm.4480	NM_011247	ENSMUSG00000030779	4933422O15Rik|AI316869|BB233631|C030034J04Rik|C77662|P2P-R|PACT	-	7|7 F2	retinoblastoma binding protein 6, ubiquitin ligase	protein-coding	no	no	757.262	yes
Steap3	NM_001085409	chr1	120226416	120271082	-	3117	1	Steap3||Steap3|NM_001085409|	16.93	20.28	21.12	43.52	23.29	0.769912	0.0283717	0.854218	Mm.181033	NM_133186	ENSMUSG00000026389	1010001D01Rik|Tsap6|pHyde	-	1|1 E2.3	STEAP family member 3	protein-coding	no	no	25.028	yes
Clgn	NM_001329680	chr8	83389842	83428552	+	3941	1	Clgn||Clgn|NM_001329680|	87.05	133.61	127.62	86.19	88.48	-0.425769	0.0285242	0.856032	Mm.358581	NM_009904	ENSMUSG00000002190	4930459O04Rik|A2/6|AI528775|Cln	-	8 C2|8 39.97 cM	calmegin	protein-coding	no	no	104.59	yes
Ppan	NM_145610	chr9	20888175	20892179	+	1650	1	Ppan||Ppan|NM_145610|	85.84	97.82	81.71	122.03	108.98	0.38169	0.0291181	0.858081	Mm.2930	NM_145610	ENSMUSG00000004100	A230087P06Rik|SSF1	-	9|9 A3	peter pan homolog	protein-coding	no	no	99.276	yes
C1qb	NM_009777	chr4	136880126	136886200	-	1099	1	C1qb||C1qb|NM_009777|	962.36	946.02	780.41	716.83	777.73	-0.276596	0.0290579	0.858081	Mm.2570	NM_009777	ENSMUSG00000036905	Adia	-	4 D3|4 69.05 cM	complement component 1, q subcomponent, beta polypeptide	protein-coding	no	no	836.67	yes
Nasp	NM_016777	chr4	116601052	116627951	-	3056	1	Nasp||Nasp|NM_016777|	48.36	38.17	56.92	77.66	60.54	0.510841	0.028914	0.858081	Mm.257181	NM_016777	ENSMUSG00000028693	5033430J04Rik|AI131596|AI317140|D4Ertd767e|Epcs32|Nasp-T	-	4 D1|4 53.24 cM	nuclear autoantigenic sperm protein (histone-binding)	protein-coding	no	no	56.33	yes
Slc35b1	NM_016752	chr11	95384856	95391776	+	1342	1	Slc35b1||Slc35b1|NM_016752|	140.24	145.54	143.23	116.91	113.63	-0.320321	0.0291365	0.858081	Mm.4593	NM_016752	ENSMUSG00000020873	UGTrel1|Ugalt2	-	11 D|11 59.01 cM	solute carrier family 35, member B1	protein-coding	no	no	131.91	yes
Fech	NM_007998	chr18	64456542	64489098	-	2920	1	Fech||Fech|NM_007998|	253.89	268.42	265.34	229.56	210.5	-0.26475	0.028723	0.858081	Mm.1070	NM_007998	ENSMUSG00000024588	AI894116|Fcl|fch	-	18 E1|18 37.43 cM	ferrochelatase	protein-coding	no	no	245.542	yes
Ralgds	NM_001145835	chr2	28533464	28553082	+	3591	1	Ralgds||Ralgds|NM_001145835|	145.08	194.45	166.18	198.84	225.4	0.319503	0.0287627	0.858081	Mm.5236	NM_009058	ENSMUSG00000026821	Gnds|Rgds|mKIAA1308	-	2|2 A3	ral guanine nucleotide dissociation stimulator	protein-coding	no	no	185.99	yes
Rap2b	NM_028712	chr3	61364507	61368703	+	4196	1	Rap2b||Rap2b|NM_028712|	89.47	101.4	115.68	142.51	122.02	0.355213	0.0290593	0.858081	Mm.422674	NM_028712	ENSMUSG00000036894	4021402C18Rik|AA408554	-	3|3 E1	RAP2B, member of RAS oncogene family	protein-coding	no	no	114.216	yes
Pdgfrb	NM_008809	chr18	61045150	61085067	+	5365	1	Pdgfrb||Pdgfrb|NM_008809|	24.18	27.44	23.87	48.64	31.67	0.672625	0.0291041	0.858081	Mm.4146	NM_008809	ENSMUSG00000024620	AI528809|CD140b|PDGFR-1|Pdgfr	-	18 E1|18 34.41 cM	platelet derived growth factor receptor, beta polypeptide	protein-coding	no	no	31.16	yes
Comp	NM_016685	chr8	70373548	70382066	+	2389	1	Comp||Comp|NM_016685|	29.02	13.12	33.05	67.42	27.01	0.894702	0.0286874	0.858081	Mm.45071	NM_016685	ENSMUSG00000031849	TSP5	-	8 B3.3|8 34.15 cM	cartilage oligomeric matrix protein	protein-coding	no	no	33.924	yes
Gpr180	NM_021434	chr14	118137127	118164232	+	2860	1	Gpr180||Gpr180|NM_021434|	106.39	137.19	109.26	176.65	133.19	0.392784	0.0288968	0.858081	Mm.275411	NM_021434	ENSMUSG00000022131	AB041545|E130016I23Rik|Itr	-	14|14 E4	G protein-coupled receptor 180	protein-coding	no	no	132.536	yes
Abcd1	NM_007435	chrX	73716597	73738534	+	3629	1	Abcd1||Abcd1|NM_007435|	851.13	851.78	814.39	645.15	780.53	-0.249384	0.0287367	0.858081	Mm.365	NM_007435	ENSMUSG00000031378	ALDP|Ald|Aldgh	-	X A7.3|X 37.39 cM	ATP-binding cassette, sub-family D (ALD), member 1	protein-coding	no	no	788.596	yes
Etfb	NR_075104	chr7	43444072	43457800	+	892	1	Etfb||Etfb|NR_075104|	43.52	42.95	53.25	25.6	36.33	-0.614328	0.028855	0.858081	Mm.30200	NM_026695	ENSMUSG00000004610	0610009I16Rik|2810441H06Rik	-	7 B3|7 28.25 cM	electron transferring flavoprotein, beta polypeptide	protein-coding	no	no	40.33	yes
Adap1	NM_172723	chr5	139271876	139325464	-	2378	1	Adap1||Adap1|NM_172723|	137.83	140.77	161.59	192.86	173.24	0.30365	0.0289471	0.858081	Mm.297819	NM_172723	ENSMUSG00000056413	4930431P11Rik|Centa1|GC1L|p42IP4	-	5|5 G2	ArfGAP with dual PH domains 1	protein-coding	no	no	161.258	yes
Zswim4	NM_172503	chr8	84210942	84237042	-	4321	1	Zswim4||Zswim4|NM_172503|	221.25	201.61	234.12	264.55	266.38	0.262759	0.0293627	0.858228	Mm.117094	NM_172503	ENSMUSG00000035671	D330002I24|E130119J17Rik	-	8|8 C2	zinc finger SWIM-type containing 4	protein-coding	no	no	237.582	yes
Flvcr1	NM_001081259	chr1	191005832	191026190	-	4068	1	Flvcr1||Flvcr1|NM_001081259|	178.93	158.66	208.42	122.89	163.93	-0.364345	0.0292669	0.858228	Mm.134053	NM_198025	ENSMUSG00000066595	9630055N22Rik|FLVCR|Mfsd7b	-	1|1 H6	feline leukemia virus subgroup C cellular receptor 1	protein-coding	no	no	166.566	yes
Mga	NM_013720	chr2	119897228	119969581	+	13884	1	Mga||Mga|NM_013720|	833	779.01	683.09	1026.61	852.24	0.283453	0.029397	0.858228	Mm.87532	NM_013720	ENSMUSG00000033943	AV312082|C130042M01Rik|C80739|D030062C11Rik|Mad5	-	2|2 E5	MAX gene associated	protein-coding	no	no	834.79	yes
Rrad	NM_019662	chr8	104628070	104631289	-	1530	1	Rrad||Rrad|NM_019662|	153.54	109.75	153.33	163.85	197.46	0.360907	0.0293081	0.858228	Mm.29467	NM_019662	ENSMUSG00000031880	REM3|Rad	-	8|8 D3	Ras-related associated with diabetes	protein-coding	no	no	155.586	yes
Ppcdc	NR_152144	chr9	57413961	57440114	-	1906	1	Ppcdc||Ppcdc|NR_152144|	544.05	555.92	513.24	433.51	484.34	-0.241031	0.0293429	0.858228	Mm.250508	NM_176831	ENSMUSG00000063849	1810057I13Rik|8430432M10Rik	-	9|9 B	phosphopantothenoylcysteine decarboxylase	protein-coding	no	no	506.212	yes
Naglu	NM_013792	chr11	101070094	101077671	+	2466	1	Naglu||Naglu|NM_013792|	720.56	693.11	666.57	582	610.08	-0.230798	0.0293169	0.858228	Mm.95452	NM_013792	ENSMUSG00000001751	-	-	11|11 D	alpha-N-acetylglucosaminidase (Sanfilippo disease IIIB)	protein-coding	no	no	654.464	yes
H2-Q8	NM_023124	chr17	35424847	35428361	+	1002	1	H2-Q8||H2-Q8|NM_023124|	32.64	16.7	22.95	33.28	46.57	0.713637	0.029187	0.858228	Mm.486287	NM_023124		H-2Q8|MMS10-T|Ms10t|Qa-2|Qa-8|Qa8	-	17 B1|17	histocompatibility 2, Q region locus 8	protein-coding	no	no	30.428	yes
Yipf4	NM_026417	chr17	74489493	74500277	+	2122	1	Yipf4||Yipf4|NM_026417|	212.78	232.63	237.8	191.16	189.08	-0.273283	0.0296965	0.864486	Mm.41891	NM_026417	ENSMUSG00000024072	2310034L04Rik	-	17|17 E2	Yip1 domain family, member 4	protein-coding	no	no	212.69	yes
Lcmt2	NM_177846	chr2	121137292	121140698	-	3406	1	Lcmt2||Lcmt2|NM_177846|	95.51	96.63	85.39	114.35	125.74	0.36954	0.0296757	0.864486	Mm.219449	NM_177846	ENSMUSG00000074890	D330024M17|Tyw4	-	2|2 E5	leucine carboxyl methyltransferase 2	protein-coding	no	no	103.524	yes
Ulk2	NM_013881	chr11	61775598	61855092	-	5760	1	Ulk2||Ulk2|NM_013881|	1022.81	985.39	921.81	764.62	894.16	-0.250091	0.0297313	0.864502	Mm.162025	NM_013881	ENSMUSG00000004798	A830085I22Rik|AU015340|Unc51.2|mKIAA0623	-	11|11 B2	unc-51 like kinase 2	protein-coding	no	no	917.758	yes
Rab11fip5	NM_001003955	chr6	85334962	85374634	-	6113	1	Rab11fip5||Rab11fip5|NM_001003955|	991.38	864.9	899.77	1359.42	948.18	0.316105	0.0297671	0.864547	Mm.220334	NM_177466	ENSMUSG00000051343	9130206P09Rik|C75969|D6Ertd32e|GAF1|RIP11	-	6 C3|6 37.35 cM	RAB11 family interacting protein 5 (class I)	protein-coding	no	no	1012.73	yes
Slc39a13	NM_001290765	chr2	91061781	91070315	-	2397	1	Slc39a13||Slc39a13|NM_001290765|	200.69	250.52	252.49	275.64	297.12	0.272439	0.0299013	0.867446	Mm.192375	NM_026721	ENSMUSG00000002105	1100001L14Rik|AA387663|ZIP-13|ZIP13	-	2|2 E1	solute carrier family 39 (metal ion transporter), member 13	protein-coding	no	no	255.292	yes
Acat1	NM_144784	chr9	53580522	53610350	-	3350	1	Acat1||Acat1|NM_144784|	111.23	107.37	139.56	94.72	92.21	-0.37305	0.0303135	0.868739	Mm.293233	NM_144784	ENSMUSG00000032047	6330585C21Rik|Acat	-	9 A5.3|9 29.12 cM	acetyl-Coenzyme A acetyltransferase 1	protein-coding	no	no	109.018	yes
Mrtfb	NM_001122667	chr16	13256481	13417529	+	8248	1	Mrtfb||Mrtfb|NM_001122667|	162.01	181.33	158.84	221.88	193.73	0.305838	0.0303446	0.868739	Mm.270643	NM_153588	ENSMUSG00000009569	Gt4-1|MRTF-B|Mkl2|mKIAA1243	-	16|16 A1	myocardin related transcription factor B	protein-coding	no	no	183.558	yes
Klhl26	NM_001364258	chr8	70450218	70476945	-	3204	1	Klhl26||Klhl26|NM_001364258|	130.57	147.93	145.07	199.69	158.34	0.33329	0.0302173	0.868739	Mm.187090	NM_172052	ENSMUSG00000055707	C630013N10Rik|Klkl26	-	8|8 B3.3	kelch-like 26	protein-coding	no	no	156.32	yes
Stau2	NM_001347044	chr1	16344291	16519115	-	3199	1	Stau2||Stau2|NM_001347044|	85.84	110.95	128.54	74.24	89.42	-0.428608	0.0303959	0.868739	Mm.216257	NM_025303	ENSMUSG00000025920	-	-	1|1 A3	staufen double-stranded RNA binding protein 2	protein-coding	no	no	97.798	yes
G2e3	NM_001167963	chr12	51348230	51376986	+	6672	1	G2e3||G2e3|NM_001167963|	152.33	159.86	133.13	208.22	169.52	0.343729	0.0302511	0.868739	Mm.253264	NM_001015099	ENSMUSG00000035293	6030408C04Rik|9030416F18|AW046379|D930034K21Rik|mKIAA1333	-	12|12 B3	G2/M-phase specific E3 ubiquitin ligase	protein-coding	no	no	164.612	yes
Mob3c	NM_175308	chr4	115828080	115836185	+	2889	1	Mob3c||Mob3c|NM_175308|	553.72	559.5	618.82	686.97	665.96	0.215274	0.0302299	0.868739	Mm.35571	NM_175308	ENSMUSG00000028709	AW822253|D130076I06Rik|Mobkl2c	-	4|4 D1	MOB kinase activator 3C	protein-coding	no	no	616.994	yes
Nanos1	NM_178421	chr19	60755987	60759914	+	3927	1	Nanos1||Nanos1|NM_178421|	66.49	53.68	50.5	26.45	47.5	-0.636256	0.0300077	0.868739	Mm.186390	NM_178421	ENSMUSG00000072437	NOS-1	-	19|19 D3	nanos C2HC-type zinc finger 1	protein-coding	no	no	48.924	yes
Pde1b	NM_008800	chr15	103503034	103530056	+	3191	1	Pde1b||Pde1b|NM_008800|	600.87	838.65	764.81	1038.55	798.22	0.311397	0.0304277	0.868739	Mm.390792	NM_008800	ENSMUSG00000022489	Pde1b1	-	15|15 F3	phosphodiesterase 1B, Ca2+-calmodulin dependent	protein-coding	no	no	808.22	yes
Car2	NM_009801	chr3	14886288	14900770	+	1915	1	Car2||Car2|NM_009801|	4.84	38.17	32.13	36.7	65.2	1.0026	0.0303684	0.868739	Mm.1186	NM_009801	ENSMUSG00000027562	AI131712|CAII|Ca2|Car-2|Ltw-5|Lvtw-5	-	3 A1|3 3.23 cM	carbonic anhydrase 2	protein-coding	no	no	35.408	yes
Slc46a1	NM_026740	chr11	78465701	78471945	+	1965	1	Slc46a1||Slc46a1|NM_026740|	419.52	493.89	497.63	380.6	421	-0.244887	0.0302479	0.868739	Mm.131618	NM_026740	ENSMUSG00000020829	1110002C08Rik|D11Ertd18e|HCP1|Pcft	-	11 B5|11 46.74 cM	solute carrier family 46, member 1	protein-coding	no	no	442.528	yes
Thsd1	NM_019576	chr8	22227303	22261332	+	4421	1	Thsd1||Thsd1|NM_019576|	56.82	63.23	52.33	78.51	79.17	0.452641	0.0308979	0.872533	Mm.32067	NM_019576	ENSMUSG00000031480	4833423O18Rik|Tmtsp	-	8|8 A2	thrombospondin, type I, domain 1	protein-coding	no	no	66.012	yes
Rtn1	NM_153457	chr12	72211749	72409054	-	3615	1	Rtn1||Rtn1|NM_153457|	548.88	553.54	548.13	482.16	470.36	-0.219616	0.0308193	0.872533	Mm.221275	NM_153457	ENSMUSG00000021087	Nsp	-	12|12 C3	reticulon 1	protein-coding	no	no	520.614	yes
Sgce	NM_001130188	chr6	4674350	4747204	-	1781	1	Sgce||Sgce|NM_001130188|	218.83	275.58	251.57	191.16	217.95	-0.294963	0.0307289	0.872533	Mm.8739	NM_011360	ENSMUSG00000004631	e-SG	-	6 A1|6 1.81 cM	sarcoglycan, epsilon	protein-coding	no	no	231.018	yes
Flna	NM_001290421	chrX	74223461	74246534	-	8276	1	Flna||Flna|NM_001290421|	689.13	691.92	629.84	992.47	688.32	0.314519	0.0307503	0.872533	Mm.295533	NM_010227	ENSMUSG00000031328	ABP-280|Dilp2|F730004A14Rik|Fln1|GENA 379|filamin-1	-	X A7.3|X 37.89 cM	filamin, alpha	protein-coding	no	no	738.336	yes
Txndc12	NM_025334	chr4	108834678	108862119	+	1261	1	Txndc12||Txndc12|NM_025334|	164.42	200.42	193.73	151.9	153.68	-0.298105	0.0307991	0.872533	Mm.159965	NM_025334	ENSMUSG00000028567	0610040B21Rik|ERp16|ERp19	-	4|4 C7	thioredoxin domain containing 12 (endoplasmic reticulum)	protein-coding	no	no	172.83	yes
Als2	NM_001159948	chr1	59162756	59237093	-	6614	1	Als2||Als2|NM_001159948|	158.38	144.35	145.07	197.13	175.11	0.31122	0.0309063	0.872533	Mm.272078	NM_028717	ENSMUSG00000026024	3222402C23Rik|9430073A21Rik|Als2cr6|Alsin|mKIAA1563	-	1|1 C1.3	alsin Rho guanine nucleotide exchange factor	protein-coding	no	no	164.008	yes
Bnip3l	NM_009761	chr14	66985240	67008877	-	3226	1	Bnip3l||Bnip3l|NM_009761|	373.58	458.1	411.32	364.39	333.45	-0.258165	0.0308285	0.872533	Mm.29820	NM_009761	ENSMUSG00000022051	C86132|D14Ertd719e|Nip3L|Nix	-	14 D1|14 34.6 cM	BCL2/adenovirus E1B interacting protein 3-like	protein-coding	no	no	388.168	yes
Ccl4	NM_013652	chr11	83662584	83664683	+	655	1	Ccl4||Ccl4|NM_013652|	438.87	421.12	347.05	308.07	352.07	-0.297723	0.0307564	0.872533	Mm.244263	NM_013652	ENSMUSG00000018930	AT744.1|Act-2|MIP-1B|Mip1b|Scya4	-	11 C|11 51.09 cM	chemokine (C-C motif) ligand 4	protein-coding	no	no	373.436	yes
C920006O11Rik	NR_040401	chr9	78175914	78178882	+	1440	1	C920006O11Rik||C920006O11Rik|NR_040401|	21.76	42.95	22.95	11.09	19.56	-0.936956	0.0313112	0.873523	Mm.131285	NR_040401	ENSMUSG00000097574	-	-	9|9 E1	RIKEN cDNA C920006O11 gene	ncRNA	no	no	23.662	yes
Zfp777	NM_001347139	chr6	48024188	48047794	-	3134	1	Zfp777||Zfp777|NM_001347139|	220.04	217.12	240.55	319.16	242.17	0.302228	0.0310279	0.873523	Mm.381553	NM_001081382	ENSMUSG00000071477	2500002G23Rik	-	6|6 B2.3	zinc finger protein 777	protein-coding	no	no	247.808	yes
Samd1	NM_001081415	chr8	83997516	84000407	+	2239	1	Samd1||Samd1|NM_001081415|	238.17	204	237.8	157.87	208.64	-0.323625	0.0313913	0.873523		NM_001081415	ENSMUSG00000079003	AA589507	-	8|8 C2	sterile alpha motif domain containing 1	protein-coding	no	no	209.296	yes
Ctss	NM_001267695	chr3	95526786	95556405	+	1345	1	Ctss||Ctss|NM_001267695|	824.54	810.02	650.04	605.04	657.58	-0.284709	0.0311641	0.873523	Mm.3619	NM_021281	ENSMUSG00000038642	Cats	-	3 F2.1|3 40.74 cM	cathepsin S	protein-coding	no	no	709.444	yes
Zfp653	NM_001310759	chr9	22055411	22071376	-	2195	1	Zfp653||Zfp653|NM_001310759|	112.44	140.77	151.49	179.21	161.13	0.31863	0.0313108	0.873523	Mm.347707	NM_177318	ENSMUSG00000038895	E430039K05Rik|Znf653	-	9|9 A3	zinc finger protein 653	protein-coding	no	no	149.008	yes
Ubox5	NM_001255993	chr2	130589996	130630038	-	3871	1	Ubox5||Ubox5|NM_001255993|	87.05	107.37	89.98	132.27	114.56	0.375703	0.031259	0.873523	Mm.486003	NM_080562	ENSMUSG00000027300	1500010O06Rik|C330018L13Rik|Rnf37|UIP5|Ubce7ip5|Ube7ip5	-	2 F1|2	U box domain containing 5	protein-coding	no	no	106.246	yes
Tlnrd1	NM_030705	chr7	83880495	83884341	-	3846	1	Tlnrd1||Tlnrd1|NM_030705|	204.32	190.87	252.49	264.55	266.38	0.2792	0.0313846	0.873523	Mm.272998	NM_030705	ENSMUSG00000070462	AW061151|Mesdc1	-	7|7 D3	talin rod domain containing 1	protein-coding	no	no	235.722	yes
Cplane1	NM_001162906	chr15	8169106	8271158	+	10364	1	Cplane1||Cplane1|NM_001162906|	147.5	124.07	109.26	162.14	164.86	0.360795	0.0313307	0.873523	Mm.164436	NM_001162906	ENSMUSG00000039801	2410089E03Rik|4732468D17Rik|Hug|Jbts17|b2b012Clo	-	15|15 A1	ciliogenesis and planar polarity effector 1	protein-coding	no	no	141.566	yes
Cbx4	NM_007625	chr11	119077571	119086237	-	5188	1	Cbx4||Cbx4|NM_007625|	550.09	477.19	590.36	603.33	688.32	0.2453	0.0312768	0.873523	Mm.268070	NM_007625	ENSMUSG00000039989	MPc2|PC2	-	11 E2|11 83.34 cM	chromobox 4	protein-coding	no	no	581.858	yes
Narf	NM_026272	chr11	121237236	121255856	+	4391	1	Narf||Narf|NM_026272|	388.09	368.63	404.9	457.41	454.53	0.222654	0.0311677	0.873523	Mm.291832	NM_026272	ENSMUSG00000000056	4430402O11Rik	-	11|11 E2	nuclear prelamin A recognition factor	protein-coding	no	no	414.712	yes
Slc25a11	NM_024211	chr11	70644027	70647039	-	1846	1	Slc25a11||Slc25a11|NM_024211|	285.32	308.98	292.89	249.18	251.48	-0.251	0.0312415	0.873523	Mm.296082	NM_024211	ENSMUSG00000014606	2310022P18Rik|2oxoc	-	11 B3|11 43.21 cM	solute carrier family 25 (mitochondrial carrier oxoglutarate carrier), member 11	protein-coding	no	no	277.57	yes
Fbxl18	NM_001033312	chr5	142871789	142895238	-	2822	1	Fbxl18||Fbxl18|NM_001033312|	65.29	103.79	89.98	144.22	96.87	0.472498	0.0314559	0.874355	Mm.89753	NM_001033312	ENSMUSG00000066640	AI427077|B130019G13Rik|C330021B20Rik	-	5 G2|5	F-box and leucine-rich repeat protein 18	protein-coding	no	no	100.03	yes
Sptan1	NM_001309460	chr2	29965560	30031450	+	7965	1	Sptan1||Sptan1|NM_001309460|	336.1	270.8	346.14	424.13	355.8	0.282844	0.0315307	0.874654	Mm.204969	NM_001076554	ENSMUSG00000057738	2610027H02Rik|Spna-2|Spna2	-	2 B|2 20.93 cM	spectrin alpha, non-erythrocytic 1	protein-coding	no	no	346.594	yes
Manf	NM_029103	chr9	106888753	106891938	-	861	1	Manf||Manf|NM_029103|	188.6	161.05	191.89	143.37	151.82	-0.305573	0.0316402	0.875622	Mm.29778	NM_029103	ENSMUSG00000032575	3230402M22Rik|AA407711|AA408789|AA673178|Armet|D17914|D18Mgi17	-	9 F1|9 57.98 cM	mesencephalic astrocyte-derived neurotrophic factor	protein-coding	no	no	167.346	yes
Shisa5	NM_001284332	chr9	109038567	109057792	+	1912	1	Shisa5||Shisa5|NM_001284332|	488.43	498.66	476.51	413.03	428.45	-0.225053	0.0316276	0.875622	Mm.196533	NM_025858	ENSMUSG00000025647	2310008D10Rik|6430628I05Rik|Scotin|mShisa5	-	9|9 F2	shisa family member 5	protein-coding	no	no	461.016	yes
Cacfd1	NM_029862	chr2	27009926	27021089	+	1637	1	Cacfd1||Cacfd1|NM_029862|	32.64	44.14	51.42	61.44	61.47	0.497323	0.031786	0.877732	Mm.150270	NM_029862	ENSMUSG00000015488	5930434B04Rik|mFwe	-	2|2 A3	calcium channel flower domain containing 1	protein-coding	no	no	50.222	yes
Gm16845	NR_040406	chr9	22071002	22086131	+	1511	1	Gm16845||Gm16845|NR_040406|	15.72	34.6	28.46	9.39	18.63	-0.92775	0.0318749	0.878614	Mm.439941	NR_040406	ENSMUSG00000096981	-	-	9 A3|9 8.23 cM	predicted gene, 16845	ncRNA	no	no	21.36	yes
Zfp574	NM_175477	chr7	25076807	25083492	+	4631	1	Zfp574||Zfp574|NM_175477|	232.13	186.1	230.45	247.48	287.81	0.291585	0.0319379	0.879042	Mm.41568	NM_175477	ENSMUSG00000045252	A630056B21Rik|Znf574	-	7|7 A3	zinc finger protein 574	protein-coding	no	no	236.794	yes
Nt5dc3	NM_175331	chr10	86779005	86838389	+	5925	1	Nt5dc3||Nt5dc3|NM_175331|	170.47	169.4	216.68	220.17	238.44	0.285085	0.0320568	0.879438	Mm.200446	NM_175331	ENSMUSG00000054027	AU040402|AW540062|C630002B14Rik|TU12B1-TY	-	10|10 C1	5'-nucleotidase domain containing 3	protein-coding	no	no	203.032	yes
Poglut2	NM_023645	chr1	44106546	44118773	-	2305	1	Poglut2||Poglut2|NM_023645|	96.72	101.4	110.18	64	92.21	-0.416349	0.0320491	0.879438	Mm.281714	NM_023645	ENSMUSG00000026047	1810049A15Rik|5730416C13Rik|EP58|Kdel1|Kdelc1	-	1|1 C1.1	protein O-glucosyltransferase 2	protein-coding	no	no	92.902	yes
Smg5	NM_178246	chr3	88336260	88362337	+	4404	1	Smg5||Smg5|NM_178246|	360.28	336.42	383.78	430.95	421	0.228353	0.0319873	0.879438	Mm.439830	NM_173188	ENSMUSG00000001415	BC024683|mKIAA1089	-	3|3 F1	Smg-5 homolog, nonsense mediated mRNA decay factor (C. elegans)	protein-coding	no	no	386.486	yes
Laptm5	NM_010686	chr4	130913316	130936148	+	2401	1	Laptm5||Laptm5|NM_010686|	1692.59	1722.64	1397.4	1292.86	1394.33	-0.271237	0.0321953	0.882276	Mm.271868	NM_010686	ENSMUSG00000028581	E3|Stra13	-	4|4 D2.2	lysosomal-associated protein transmembrane 5	protein-coding	no	no	1499.96	yes
Dpm2	NM_010073	chr2	32570858	32573571	+	854	1	Dpm2||Dpm2|NM_010073|	106.39	141.96	142.31	109.23	94.07	-0.369882	0.0322361	0.882436	Mm.22001	NM_010073	ENSMUSG00000026810	AW557993|R75484	-	2|2 B	dolichol-phosphate (beta-D) mannosyltransferase 2	protein-coding	no	no	118.792	yes
Golga4	NM_018748	chr9	118506318	118582519	+	7485	1	Golga4||Golga4|NM_018748|	431.61	305.4	373.68	487.28	433.11	0.301148	0.0325534	0.883448	Mm.10409	NM_018748	ENSMUSG00000038708	AI225887|AU019508|Olp-1	-	9|9 F3	golgi autoantigen, golgin subfamily a, 4	protein-coding	no	no	406.216	yes
Pacsin1	NM_011861	chr17	27655591	27711117	+	4179	1	Pacsin1||Pacsin1|NM_011861|	72.54	106.17	115.68	29.87	88.48	-0.74924	0.032529	0.883448	Mm.4926	NM_011861	ENSMUSG00000040276	A830061D09Rik|H74|mKIAA1379|syndapin	-	17|17 A3.3	protein kinase C and casein kinase substrate in neurons 1	protein-coding	no	no	82.548	yes
Zfp36	NM_011756	chr7	28376784	28379228	-	1762	1	Zfp36||Zfp36|NM_011756|	1883.62	1840.75	1455.24	1356.86	1493.99	-0.293045	0.0326579	0.883448	Mm.389856	NM_011756	ENSMUSG00000044786	Gos24|Nup475|TIS11D|TISII|Tis11|Ttp|Zfp-36	-	7 A3-B1|7 16.72 cM	zinc finger protein 36	protein-coding	no	no	1606.09	yes
Hpgd	NM_008278	chr8	56294552	56321046	+	1706	1	Hpgd||Hpgd|NM_008278|	686.71	639.43	582.1	529.09	550.47	-0.249285	0.0323999	0.883448	Mm.18832	NM_008278	ENSMUSG00000031613	15-PGDH|AV026552	-	8|8 B2	hydroxyprostaglandin dehydrogenase 15 (NAD)	protein-coding	no	no	597.56	yes
Ap4b1	NM_026193	chr3	103809517	103822025	+	2891	1	Ap4b1||Ap4b1|NM_026193|	164.42	177.75	195.56	154.46	139.71	-0.299159	0.0326977	0.883448	Mm.197568	NM_026193	ENSMUSG00000032952	1810038H16Rik|AV004952|Ap4b4	-	3|3 F2.2	adaptor-related protein complex AP-4, beta 1	protein-coding	no	no	166.38	yes
Ywhae	NM_009536	chr11	75732887	75765841	+	2067	1	Ywhae||Ywhae|NM_009536|	661.32	681.18	674.83	563.23	604.49	-0.216673	0.0323444	0.883448	Mm.234700	NM_009536	ENSMUSG00000020849	AU019196	-	11 B5|11 45.92 cM	tyrosine 3-monooxygenase/tryptophan 5-monooxygenase activation protein, epsilon polypeptide	protein-coding	no	no	637.01	yes
Zfp7	NM_001358816	chr15	76879253	76892394	+	3012	1	Zfp7||Zfp7|NM_001358816|	21.76	23.86	22.04	44.38	28.87	0.695763	0.0326259	0.883448	Mm.38948	NM_145916	ENSMUSG00000033669	KRAB20|KRAB7|Krox-2|Zfp-7|Zfp65|Zfp80|Zfp86-rs1|mszf73-2	-	15 D3|15 36.28 cM	zinc finger protein 7	protein-coding	no	no	28.182	yes
Rint1	NM_177323	chr5	23787711	23820369	+	3269	1	Rint1||Rint1|NM_177323|	101.56	100.21	112.01	145.93	122.02	0.344692	0.0324937	0.883448	Mm.133300	NM_177323	ENSMUSG00000028999	1500019C06Rik|2810450M21Rik|Rint-1	-	5|5 A3	RAD50 interactor 1	protein-coding	no	no	116.346	yes
Otud1	NM_027715	chr2	19657731	19661279	+	3548	1	Otud1||Otud1|NM_027715|	616.59	516.55	488.45	474.48	421.93	-0.282	0.0327631	0.883448	Mm.83981	NM_027715	ENSMUSG00000043415	4933428L19Rik	-	2|2 A3	OTU domain containing 1	protein-coding	no	no	503.6	yes
Ctsd	NM_009983	chr7	142375910	142387827	-	1900	1	Ctsd||Ctsd|NM_009983|	1757.88	1701.17	1362.51	1251.9	1403.64	-0.292004	0.032646	0.883448	Mm.231395	NM_009983	ENSMUSG00000007891	CD|CatD	-	7|7 F5	cathepsin D	protein-coding	no	no	1495.42	yes
Olfml3	NM_133859	chr3	103735394	103738001	-	1731	1	Olfml3||Olfml3|NM_133859|	1340.78	1333.74	1122.88	1011.25	1120.49	-0.26298	0.0327373	0.883448	Mm.211535	NM_133859	ENSMUSG00000027848	2810002E22Rik|AI115209|AW550633|HNOEL-iso|ONT3|mONT3	-	3|3 F2.2	olfactomedin-like 3	protein-coding	no	no	1185.83	yes
Cpd	NM_007754	chr11	76777208	76847008	-	9111	1	Cpd||Cpd|NM_007754|	458.21	481.96	451.72	640.88	488.99	0.273934	0.0329938	0.886827	Mm.276736	NM_007754	ENSMUSG00000020841	AA960140|AW322530|D830034L15Rik	-	11 B5|11 46.05 cM	carboxypeptidase D	protein-coding	no	no	504.352	yes
Srebf2	NM_033218	chr15	82147269	82204960	+	4533	1	Srebf2||Srebf2|NM_033218|	269.61	270.8	291.05	330.26	327.86	0.234185	0.0329892	0.886827	Mm.38016	NM_033218	ENSMUSG00000022463	AI608257|SREBP-2|SREBP2|SREBP2gc|bHLHd2|lop13|nuc	-	15|15 E1	sterol regulatory element binding factor 2	protein-coding	no	no	297.916	yes
Fcrl1	NM_153090	chr3	87376387	87392133	+	2021	1	Fcrl1||Fcrl1|NM_153090|	186.19	236.21	222.19	174.09	179.76	-0.293056	0.0331055	0.887939	Mm.255203	NM_153090	ENSMUSG00000059994	A230020G22Rik|Bxmas1|Bxmh1|Bxmh1b|Fcrh1|Fcrh1l|Fcrh1s|Ifgp1	-	3|3 F1	Fc receptor-like 1	protein-coding	no	no	199.688	yes
Ankrd28	NM_001024604	chr14	31700015	31830415	-	5174	1	Ankrd28||Ankrd28|NM_001024604|	106.39	125.26	100.08	162.99	125.74	0.381711	0.0330746	0.887939	Mm.37660	NM_001024604	ENSMUSG00000014496	AI465466|AI604979|E430019N21Rik|mKIAA0379	-	14|14 B	ankyrin repeat domain 28	protein-coding	no	no	124.092	yes
Gca	NM_145523	chr2	62664327	62694109	+	3273	1	Gca||Gca|NM_145523|	64.08	62.03	61.52	52.06	35.39	-0.517113	0.0332059	0.889019	Mm.219877	NM_145523	ENSMUSG00000026893	5133401E04Rik|AI573844	-	2|2 C1.3	grancalcin	protein-coding	no	no	55.016	yes
Prox1	NM_008937	chr1	190118035	190170827	-	8017	1	Prox1||Prox1|NM_008937|	209.16	159.86	225.86	244.92	249.62	0.300951	0.0332771	0.889705	Mm.132579	NM_008937	ENSMUSG00000010175	A230003G05Rik|PROX-1	-	1 H6|1 95.85 cM	prospero homeobox 1	protein-coding	no	no	217.884	yes
Nutf2	NM_001357230	chr8	105860875	105880401	+	2166	1	Nutf2||Nutf2|NM_001357230|	27.81	44.14	51.42	69.98	53.09	0.558637	0.0334706	0.893931	Mm.455474	NM_026532	ENSMUSG00000008450	2700067I02Rik|AI115459|AI413596|AW546000|Ntf2|Ntf3|PP15	-	8 D3|8 53.05 cM	nuclear transport factor 2	protein-coding	no	no	49.288	yes
Inppl1	NM_001122739	chr7	101822632	101837824	-	4701	1	Inppl1||Inppl1|NM_001122739|	484.81	447.36	465.49	564.93	532.77	0.225008	0.0336118	0.894861	Mm.476000	NM_010567	ENSMUSG00000032737	51C|SHIP2	-	7|7 E2	inositol polyphosphate phosphatase-like 1	protein-coding	no	no	499.072	yes
Mcat	NM_001030014	chr15	83546797	83555711	-	1886	1	Mcat||Mcat|NM_001030014|	129.36	134.81	171.69	107.52	123.88	-0.350754	0.0336076	0.894861	Mm.37560	NM_001030014	ENSMUSG00000048755	AI225907|BC025519	-	15|15 E1	malonyl CoA:ACP acyltransferase (mitochondrial)	protein-coding	no	no	133.452	yes
Csmd3	NM_001081391	chr15	47580638	48791989	-	12881	1	Csmd3||Csmd3|NM_001081391|	911.58	726.52	549.04	489.84	626.84	-0.403975	0.0337412	0.89703	Mm.309363	NM_001081391	ENSMUSG00000022311	4930500N14Rik|mKIAA1894	-	15|15 B3.3	CUB and Sushi multiple domains 3	protein-coding	no	no	660.764	yes
Olfm4	NM_001351947	chr14	80000302	80023141	+	2743	1	Olfm4||Olfm4|NM_001351947|	36.27	39.37	39.48	13.65	32.6	-0.754735	0.0338367	0.898006	Mm.26456	NM_001030294	ENSMUSG00000022026	GC1|GW112|Gm296|Gm913|OlfD|pPD4	-	14|14 D3	olfactomedin 4	protein-coding	no	no	32.274	yes
Ccnd1	NM_007631	chr7	144929931	144939925	-	3787	1	Ccnd1||Ccnd1|NM_007631|	663.74	818.37	729.92	600.77	656.65	-0.242567	0.0339989	0.898376	Mm.273049	NM_007631	ENSMUSG00000070348	AI327039|CycD1|Cyl-1|PRAD1|bcl-1|cD1	-	7 F5|7 88.92 cM	cyclin D1	protein-coding	no	no	693.89	yes
Psmg1	NM_019537	chr16	95979933	95990960	-	1031	1	Psmg1||Psmg1|NM_019537|	26.6	31.02	41.32	20.48	20.49	-0.711821	0.0340286	0.898376	Mm.396248	NM_019537	ENSMUSG00000022913	AW552102|Dscr2	-	16|16 C4	proteasome (prosome, macropain) assembly chaperone 1	protein-coding	no	no	27.982	yes
Limd2	NM_001356458	chr11	106156254	106160729	-	3221	1	Limd2||Limd2|NM_001356458|	571.86	583.36	611.48	495.81	529.04	-0.214142	0.0340271	0.898376	Mm.21687	NM_172397	ENSMUSG00000040699	0610025L06Rik|AI413966	-	11|11 E1	LIM domain containing 2	protein-coding	no	no	558.31	yes
Ptpn21	NM_011877	chr12	98676741	98734645	-	5660	1	Ptpn21||Ptpn21|NM_011877|	153.54	122.88	180.87	209.08	180.69	0.336757	0.0339126	0.898376	Mm.4420	NM_011877	ENSMUSG00000021009	PTPD1|PTPRL10	-	12|12 E	protein tyrosine phosphatase, non-receptor type 21	protein-coding	no	no	169.412	yes
Dusp2	NM_010090	chr2	127336159	127338377	+	1611	1	Dusp2||Dusp2|NM_010090|	263.56	196.84	181.79	254.31	299.92	0.360859	0.0340852	0.898931	Mm.4729	NM_010090	ENSMUSG00000027368	PAC1	-	2|2 F1	dual specificity phosphatase 2	protein-coding	no	no	239.284	yes
Trim14	NM_029077	chr4	46505072	46536141	-	3193	1	Trim14||Trim14|NM_029077|	330.06	334.03	356.24	264.55	312.96	-0.251518	0.0342915	0.903428	Mm.240252	NM_029077	ENSMUSG00000039853	5830400N10Rik|pub	-	4|4 B1	tripartite motif-containing 14	protein-coding	no	no	319.568	yes
Zfp983	NM_001357098	chr17	21650611	21664966	+	4580	1	Zfp983||Zfp983|NM_001357098|	106.39	115.72	115.68	87.04	92.21	-0.342076	0.0343538	0.903525	Mm.296733	NM_001166497	ENSMUSG00000035868	3110052M02Rik|mszf57|mszf71	-	17|17 A3.2	zinc finger protein 983	protein-coding	no	no	103.408	yes
Polr3gl	NM_027241	chr3	96577872	96594181	-	1412	1	Polr3gl||Polr3gl|NM_027241|	146.29	168.21	175.36	131.42	135.99	-0.303936	0.0343902	0.903525	Mm.292739	NM_027241	ENSMUSG00000028104	2010003I19Rik	-	3|3 F2.1	polymerase (RNA) III (DNA directed) polypeptide G like	protein-coding	no	no	151.454	yes
Pold4	NM_027196	chr19	4231893	4233634	+	912	1	Pold4||Pold4|NM_027196|	169.26	188.49	197.4	151.05	155.55	-0.286555	0.0345419	0.904359	Mm.32518	NM_027196	ENSMUSG00000024854	2410012M21Rik|AI463381|AW060307|Polds|p12	-	19|19 A	polymerase (DNA-directed), delta 4	protein-coding	no	no	172.35	yes
Ankrd11	NR_037865	chr8	122883822	123042284	-	8789	1	Ankrd11||Ankrd11|NR_037865|	1293.63	1333.74	1366.18	1735.76	1424.13	0.235227	0.0344843	0.904359	Mm.31567	NM_001081379	ENSMUSG00000035569	2410104C19Rik|3010027A04Rik|6330578C09Rik|9530048I21Rik|AA930108|Gm176|Yod	-	8|8 E1	ankyrin repeat domain 11	protein-coding	no	no	1430.69	yes
Klhl38	NM_177755	chr15	58314573	58324169	-	2205	1	Klhl38||Klhl38|NM_177755|	65.29	31.02	51.42	33.28	27.94	-0.694557	0.0345911	0.90471	Mm.124498	NM_177755	ENSMUSG00000022357	8230402K04Rik	-	15|15 D1	kelch-like 38	protein-coding	no	no	41.79	yes
2610203C22Rik	NR_015470	chr1	9560833	9631092	-	1236	1	2610203C22Rik||2610203C22Rik|NR_015470|	44.73	11.93	35.81	10.24	19.56	-1.06895	0.0347426	0.907731	Mm.279818	NR_015470	ENSMUSG00000079671	2310007M24Rik	-	1|1 A2	RIKEN cDNA 2610203C22 gene	ncRNA	no	no	24.454	yes
Rhoa	NM_016802	chr9	108306160	108337943	+	2164	1	Rhoa||Rhoa|NM_016802|	455.79	483.15	459.07	378.9	422.86	-0.229748	0.0349066	0.911072	Mm.757	NM_016802	ENSMUSG00000007815	Arha|Arha1|Arha2	-	9|9 F1-F2	ras homolog family member A	protein-coding	no	no	439.954	yes
Ptrhd1	NM_001204912	chr12	4234013	4240123	+	4024	1	Ptrhd1||Ptrhd1|NM_001204912|	93.09	78.74	99.16	130.57	105.25	0.370696	0.0349572	0.911451	Mm.250552	NM_001204912	ENSMUSG00000096199	2410017P09Rik	-	12|12 A1.1	peptidyl-tRNA hydrolase domain containing 1	protein-coding	no	no	101.362	yes
Mfsd11	NM_001361585	chr11	116853762	116875457	+	3058	1	Mfsd11||Mfsd11|NM_001361585|	349.4	391.29	382.86	281.61	349.28	-0.26231	0.0353524	0.914855	Mm.348004	NM_178620	ENSMUSG00000020818	2600014M03Rik	-	11|11 E2	major facilitator superfamily domain containing 11	protein-coding	no	no	350.888	yes
Tpm3	NM_001271764	chr3	90079521	90100902	+	2312	1	Tpm3||Tpm3|NM_001271764|	531.96	534.45	504.06	438.63	464.78	-0.22452	0.0352741	0.914855	Mm.240839	NM_022314	ENSMUSG00000027940	TM30nm|TMnm|Tm5NM|Tpm-5|Tpm5|Trop-5|gamma-TM|hTM30nm|hTMnm	-	3|3 F1	tropomyosin 3, gamma	protein-coding	no	no	494.776	yes
Glce	NM_033320	chr9	62057244	62122609	-	4844	1	Glce||Glce|NM_033320|	114.85	102.6	89.98	139.1	125.74	0.368116	0.0352042	0.914855	Mm.24411	NM_033320	ENSMUSG00000032252	1110017N23Rik|AI747411|C130034A12Rik|Hsepi	-	9|9 B	glucuronyl C5-epimerase	protein-coding	no	no	114.454	yes
Tbc1d5	NM_001285991	chr17	50733127	51179352	-	5637	1	Tbc1d5||Tbc1d5|NM_001285991|	627.47	683.57	647.29	531.65	596.11	-0.224238	0.035366	0.914855	Mm.120650	NM_028162	ENSMUSG00000023923	1600014N05Rik	-	17|17 C	TBC1 domain family, member 5	protein-coding	no	no	617.218	yes
Card10	NM_130859	chr15	78775136	78803042	-	4687	1	Card10||Card10|NM_130859|	24.18	27.44	28.46	40.96	40.05	0.584194	0.0352234	0.914855	Mm.17629	NM_130859	ENSMUSG00000033170	AI449026|Bimp1|Carma3	-	15|15 E1	caspase recruitment domain family, member 10	protein-coding	no	no	32.218	yes
Vegfb	NM_011697	chr19	6982472	6987651	-	1269	1	Vegfb||Vegfb|NM_011697|	245.43	244.56	221.27	175.79	214.23	-0.293436	0.0354687	0.915333	Mm.15607	NM_011697	ENSMUSG00000024962	VEGF-B|Vrf	-	19|19 A	vascular endothelial growth factor B	protein-coding	no	no	220.256	yes
Tfip11	NM_018783	chr5	112326369	112338073	+	3522	1	Tfip11||Tfip11|NM_018783|	211.57	201.61	240.55	283.32	246.83	0.26834	0.0357028	0.919492	Mm.172947	NM_018783	ENSMUSG00000029345	2810002G02Rik|AF097181|AW046167|Srr1|TIP33|Tip39	-	5|5 F	tuftelin interacting protein 11	protein-coding	no	no	236.776	yes
Speg	NM_007463	chr1	75375297	75432306	+	10706	1	Speg||Speg|NM_007463|	168.05	144.35	195.56	222.73	199.32	0.300368	0.0357595	0.920015	Mm.275397	NM_007463	ENSMUSG00000026207	AW125581|Apeg1|BPEG|D1Bwg1450e|SPEGalpha|SPEGbeta|mKIAA1297	-	1 C4|1 38.88 cM	SPEG complex locus	protein-coding	no	no	186.002	yes
Zkscan7	NM_001177505	chr9	122886818	122898619	+	5007	1	Zkscan7||Zkscan7|NM_001177505|	158.38	133.61	150.57	91.31	136.92	-0.388237	0.0358206	0.920329	Mm.86999	NM_001177505	ENSMUSG00000063488	BC042569|Zfp167	-	9|9 F4	zinc finger with KRAB and SCAN domains 7	protein-coding	no	no	134.158	yes
Agap2	NM_001301014	chr10	127078907	127093170	+	5539	1	Agap2||Agap2|NM_001301014|	197.07	214.73	254.32	288.44	254.28	0.273455	0.0358447	0.920329	Mm.336761	NM_001033263	ENSMUSG00000025422	AGAP-2|Centg1|PIKE|cnt-g1|mKIAA0167	-	10|10 D3	ArfGAP with GTPase domain, ankyrin repeat and PH domain 2	protein-coding	no	no	241.768	yes
Ino80d	NM_001081436	chr1	63047801	63114267	-	13415	1	Ino80d||Ino80d|NM_001081436|	1124.37	1021.18	960.37	1453.29	1096.28	0.286831	0.0360321	0.921481	Mm.74718	NM_001081436	ENSMUSG00000040865	7330405I11|A430093A21Rik|BC010584	-	1|1 C2	INO80 complex subunit D	protein-coding	no	no	1131.1	yes
Ccdc102a	NM_001033533	chr8	94902869	94918098	-	2287	1	Ccdc102a||Ccdc102a|NM_001033533|	33.85	38.17	33.97	58.03	45.64	0.548921	0.0360061	0.921481	Mm.277871	NM_001033533	ENSMUSG00000063605	BC027663|Gm586	-	8|8 C5	coiled-coil domain containing 102A	protein-coding	no	no	41.932	yes
Zfp691	NM_183140	chr4	119169518	119173856	-	2333	1	Zfp691||Zfp691|NM_183140|	668.57	689.53	650.04	520.56	624.98	-0.238619	0.0360948	0.92186	Mm.169620	NM_183140	ENSMUSG00000045268	6430544H17Rik|Znf691	-	4|4 D2.1	zinc finger protein 691	protein-coding	no	no	630.736	yes
Myo1g	NM_178440	chr11	6506548	6520958	-	3264	1	Myo1g||Myo1g|NM_178440|	240.59	236.21	277.28	286.73	317.61	0.248204	0.0361965	0.92186	Mm.239554	NM_178440	ENSMUSG00000020437	E430002D17Rik	-	11|11 A1	myosin IG	protein-coding	no	no	271.684	yes
Mks1	NM_001039684	chr11	87853215	87863803	+	2464	1	Mks1||Mks1|NM_001039684|	93.09	118.1	116.6	68.27	97.8	-0.415428	0.0361711	0.92186	Mm.24404	NM_001039684	ENSMUSG00000034121	AK190930|B8d3|avc6	-	11|11 C	Meckel syndrome, type 1	protein-coding	no	no	98.772	yes
Dbt	NM_010022	chr3	116513070	116549981	+	3280	1	Dbt||Dbt|NM_010022|	157.17	161.05	167.1	143.37	119.22	-0.31003	0.0361256	0.92186	Mm.3636	NM_010022	ENSMUSG00000000340	BCKAD-E2|D3Wsu60e	-	3 G1|3 50.37 cM	dihydrolipoamide branched chain transacylase E2	protein-coding	no	no	149.582	yes
Palld	NM_001293773	chr8	61511431	61760089	-	5408	1	Palld||Palld|NM_001293773|	21.76	34.6	38.56	51.2	44.71	0.573687	0.0364141	0.925533	Mm.29933	NM_001081390	ENSMUSG00000058056	2410003B16Rik|6030492A02	-	8|8 B3.1	palladin, cytoskeletal associated protein	protein-coding	no	no	38.166	yes
Sos1	NM_009231	chr17	80393752	80480453	-	8876	1	Sos1||Sos1|NM_009231|	293.79	305.4	333.28	386.58	351.14	0.233867	0.0366096	0.927701	Mm.60975	NM_009231	ENSMUSG00000024241	4430401P03Rik|9630010N06|AI449023	-	17 E3|17 50.67 cM	SOS Ras/Rac guanine nucleotide exchange factor 1	protein-coding	no	no	334.038	yes
Slc2a5	NM_019741	chr4	150119344	150144168	+	3069	1	Slc2a5||Slc2a5|NM_019741|	895.87	922.16	804.29	694.65	795.43	-0.244304	0.0366056	0.927701	Mm.260220	NM_019741	ENSMUSG00000028976	AI526984|Glut5|Slc5a	-	4|4 E2	solute carrier family 2 (facilitated glucose transporter), member 5	protein-coding	no	no	822.48	yes
Golgb1	NM_030035	chr16	36885011	36933085	+	10982	1	Golgb1||Golgb1|NM_030035|	686.71	608.41	696.86	914.82	696.7	0.267442	0.0365943	0.927701	Mm.244815	NM_030035	ENSMUSG00000034243	4930428L02Rik|628101|6330407A06Rik|AU042952|C130074L01Rik|F730017E11Rik|Gm6840|mKIAA4151	-	16|16 B3	golgi autoantigen, golgin subfamily b, macrogolgin 1	protein-coding	no	no	720.7	yes
Dtwd1	NM_001355583	chr2	126152141	126165277	+	1697	1	Dtwd1||Dtwd1|NM_001355583|	22.97	26.25	26.63	53.76	28.87	0.700712	0.0369117	0.93177	Mm.29019	NM_026981	ENSMUSG00000023330	1810033A06Rik	-	2|2 F1	DTW domain containing 1	protein-coding	no	no	31.696	yes
Zmpste24	NM_172700	chr4	121059237	121098210	-	3379	1	Zmpste24||Zmpste24|NM_172700|	378.42	368.63	388.37	321.72	331.58	-0.225169	0.0369179	0.93177	Mm.34399	NM_172700	ENSMUSG00000043207	A530043O15Rik|D030046F19|FACE1|Face-1|MADB|STE24|Ste24p	-	4|4 D2.2	zinc metallopeptidase, STE24	protein-coding	no	no	357.744	yes
Dido1	NM_175551	chr2	180657963	180702102	-	8445	1	Dido1||Dido1|NM_175551|	518.66	578.59	483.86	724.51	564.44	0.279673	0.0368609	0.93177	Mm.253836	NM_011805	ENSMUSG00000038914	6720461J16Rik|D130048F08Rik|DATF-1|DIO-1|Datf1|dido	-	2|2 H4	death inducer-obliterator 1	protein-coding	no	no	574.012	yes
Tmem119	NM_146162	chr5	113793729	113800396	-	2119	1	Tmem119||Tmem119|NM_146162|	1924.72	1826.43	1542.47	1414.04	1550.81	-0.267339	0.0370172	0.932457	Mm.41681	NM_146162	ENSMUSG00000054675	AW208946|BC025600|obif	-	5|5 F	transmembrane protein 119	protein-coding	no	no	1651.69	yes
Chn2	NM_001163640	chr6	54039932	54301812	+	3125	1	Chn2||Chn2|NM_001163640|	389.3	402.03	382.86	320.87	350.21	-0.234009	0.037019	0.932457	Mm.321147	NM_023543	ENSMUSG00000004633	1700026N20Rik|4930557O16Rik|ARHGAP3|Bch	-	6|6 B3	chimerin 2	protein-coding	no	no	369.054	yes
Tnfsf10	NM_009425	chr3	27317077	27339665	+	4935	1	Tnfsf10||Tnfsf10|NM_009425|	114.85	91.86	110.18	87.9	75.44	-0.380845	0.0372154	0.935595	Mm.1062	NM_009425	ENSMUSG00000039304	A330042I21Rik|AI448571|APO-2L|Ly81|TL2|Tnlg6a|Trail	-	3|3 A3	tumor necrosis factor (ligand) superfamily, member 10	protein-coding	no	no	96.046	yes
Zfp608	NM_175751	chr18	54888045	54990180	-	6093	1	Zfp608||Zfp608|NM_175751|	396.55	313.75	352.56	449.73	407.03	0.262443	0.0372984	0.936691	Mm.192984	NM_175751	ENSMUSG00000052713	4932417D18Rik|D430007A19Rik|Znf608	-	18|18 D3	zinc finger protein 608	protein-coding	no	no	383.924	yes
Tgfb1	NM_011577	chr7	25687002	25705077	+	2162	1	Tgfb1||Tgfb1|NM_011577|	1092.93	1073.67	964.04	853.37	936.07	-0.235935	0.0375244	0.94128	Mm.248380	NM_011577	ENSMUSG00000002603	TGF-beta1|TGFbeta1|Tgfb|Tgfb-1	-	7 A3|7 13.98 cM	transforming growth factor, beta 1	protein-coding	no	no	984.016	yes
Dgcr8	NM_033324	chr16	18253965	18289168	-	4198	1	Dgcr8||Dgcr8|NM_033324|	124.53	116.91	98.24	172.38	125.74	0.394177	0.0375557	0.94128	Mm.447352	NM_033324	ENSMUSG00000022718	D16H22S1742E|D16H22S788E|D16Wis2|Gy1|N41|Vo59c07|mir-1306	-	16 A3|16 11.31 cM	DGCR8, microprocessor complex subunit	protein-coding	no	no	127.56	yes
Rnpc3	NM_001038696	chr3	113605067	113630149	-	3859	1	Rnpc3||Rnpc3|NM_001038696|	65.29	95.44	100.08	156.17	90.35	0.49271	0.0378011	0.944518	Mm.316928	NM_026043	ENSMUSG00000027981	2810441O16Rik|AI447568|C030014B17Rik	-	3|3 F3	RNA-binding region (RNP1, RRM) containing 3	protein-coding	no	no	101.466	yes
Utrn	NM_011682	chr10	12382188	12861735	-	12235	1	Utrn||Utrn|NM_011682|	103.97	114.52	113.85	151.9	127.6	0.325646	0.0378925	0.944518	Mm.331784	NM_011682	ENSMUSG00000019820	AA589569|DRP|Dmdl	-	10 A1-A2|10 3.77 cM	utrophin	protein-coding	no	no	122.368	yes
Fnip2	NM_001162999	chr3	79455971	79567679	-	7062	1	Fnip2||Fnip2|NM_001162999|	527.12	419.92	512.32	584.56	576.55	0.241558	0.0378536	0.944518	Mm.244005	NM_001162999	ENSMUSG00000061175	D630023B12Rik|mKIAA1450	-	3|3 E3	folliculin interacting protein 2	protein-coding	no	no	524.094	yes
Med12l	NM_177855	chr3	59006978	59318412	+	10158	1	Med12l||Med12l|NM_177855|	620.21	770.66	695.95	928.47	749.79	0.25969	0.0379512	0.944625	Mm.240059	NM_177855	ENSMUSG00000056476	A130035F20|A630079M02|AU044581|TRALPUSH	-	3|3 D	mediator complex subunit 12-like	protein-coding	no	no	753.016	yes
1110002L01Rik	NR_030694	chr12	3403883	3426747	-	3295	1	1110002L01Rik||1110002L01Rik|NR_030694|	55.61	76.35	72.53	49.5	50.3	-0.464089	0.0381896	0.945896	Mm.415417	NR_030694	ENSMUSG00000071456	-	-	12|12 A1.1	RIKEN cDNA 1110002L01 gene	ncRNA	no	no	60.858	yes
Paics	NM_025939	chr5	76951302	76967509	+	2474	1	Paics||Paics|NM_025939|	213.99	208.77	197.4	171.53	172.31	-0.274111	0.0381458	0.945896	Mm.182931	NM_025939	ENSMUSG00000029247	2610511I09Rik|ADE2H1|AIRC|PAIS	-	5|5 C3.3	phosphoribosylaminoimidazole carboxylase, phosphoribosylaminoribosylaminoimidazole, succinocarboxamide synthetase	protein-coding	no	no	192.8	yes
Zfp747	NM_175560	chr7	127372537	127376050	-	2679	1	Zfp747||Zfp747|NM_175560|	81	68	75.29	116.06	84.76	0.418435	0.0384259	0.948477	Mm.221270	NM_175560	ENSMUSG00000054381	6430604K15Rik	-	7|7 F3	zinc finger protein 747	protein-coding	no	no	85.022	yes
Pitpnc1	NR_153311	chr11	107207892	107470720	-	6327	1	Pitpnc1||Pitpnc1|NR_153311|	756.83	835.08	729.92	605.04	715.33	-0.242917	0.0384442	0.948477	Mm.397413	NM_145823	ENSMUSG00000040430	1110020B03Rik|5830436L09Rik|AI662802|AI851387|C330017I21Rik|Dnr411|RDGBB|RDGBB1|mrdgBbeta|rdgB-beta	-	11|11 E1	phosphatidylinositol transfer protein, cytoplasmic 1	protein-coding	no	no	728.44	yes
Mtch1	NM_019880	chr17	29332076	29347932	-	1923	1	Mtch1||Mtch1|NM_019880|	293.79	355.5	322.27	242.36	298.05	-0.275012	0.0384243	0.948477	Mm.3224	NM_019880	ENSMUSG00000024012	2310034O17Rik|AI255158|AU018396|C77849|PSAP	-	17|17 A3.3	mitochondrial carrier 1	protein-coding	no	no	302.394	yes
Zgpat	NM_001048148	chr2	181365423	181380793	+	2054	1	Zgpat||Zgpat|NM_001048148|	257.52	180.14	200.15	263.69	271.04	0.319393	0.038412	0.948477	Mm.87720	NM_144894	ENSMUSG00000027582	1500006I01Rik|BC021513	-	2|2 H4	zinc finger, CCCH-type with G patch domain	protein-coding	no	no	234.508	yes
Oxct1	NM_024188	chr15	4026428	4155344	+	3449	1	Oxct1||Oxct1|NM_024188|	548.88	586.94	577.51	479.6	515.07	-0.212395	0.0385732	0.949803	Mm.13445	NM_024188	ENSMUSG00000022186	2610008O03Rik|Oxct|Oxct2a|Scot-s	-	15|15 A1	3-oxoacid CoA transferase 1	protein-coding	no	no	541.6	yes
Vezt	NM_001304720	chr10	93961522	94035742	-	13933	1	Vezt||Vezt|NM_001304720|	139.03	136	137.72	203.1	148.1	0.344502	0.0385499	0.949803	Mm.124177	NM_172538	ENSMUSG00000036099	A630071D13Rik|AI848282	-	10|10 C2	vezatin, adherens junctions transmembrane protein	protein-coding	no	no	152.79	yes
Snx17	NM_153680	chr5	31193304	31198900	+	1912	1	Snx17||Snx17|NM_153680|	394.13	375.78	400.31	332.82	341.83	-0.222364	0.0387182	0.950592	Mm.6118	NM_153680	ENSMUSG00000029146	5830447M19Rik|AI790646|D5Ertd260e|b2b1625.1Clo|mKIAA0064	-	5|5 B1	sorting nexin 17	protein-coding	no	no	368.974	yes
Kcnma1	NM_001253364	chr14	23306612	24004205	-	6139	1	Kcnma1||Kcnma1|NM_001253364|	134.2	137.19	136.8	71.68	130.4	-0.448067	0.0386652	0.950592	Mm.343607	NM_010610	ENSMUSG00000063142	5730414M22Rik|BKCa|MaxiK|Slo|Slo1|mSlo|mSlo1	-	14|14 A3	potassium large conductance calcium-activated channel, subfamily M, alpha member 1	protein-coding	no	no	122.054	yes
Tyrobp	NM_011662	chr7	30413782	30417579	+	563	1	Tyrobp||Tyrobp|NM_011662|	288.95	299.43	260.75	225.29	248.69	-0.266072	0.0387561	0.950599	Mm.46301	NM_011662	ENSMUSG00000030579	DAP12|KARAP|Ly83	-	7 B1|7 17.45 cM	TYRO protein tyrosine kinase binding protein	protein-coding	no	no	264.622	yes
Tmem173	NM_028261	chr18	35733678	35740554	-	2287	1	Sting1||Sting1|NM_028261|	847.51	925.74	813.47	744.99	745.13	-0.222982	0.0388404	0.950817	Mm.45995	NM_028261	ENSMUSG00000024349	2610307O08Rik|ERIS|MPYS|Mita|STING|STING-beta	-	18 B2|18	transmembrane protein 173	protein-coding	no	no	815.368	yes
Rrm2b	NM_001357022	chr15	37923953	37960856	-	4687	1	Rrm2b||Rrm2b|NM_001357022|	162.01	178.94	164.35	132.27	144.37	-0.294533	0.0392352	0.954123	Mm.24738	NM_199476	ENSMUSG00000022292	p53R2	-	15|15 B3.1	ribonucleotide reductase M2 B (TP53 inducible)	protein-coding	no	no	156.388	yes
Eef1a1	NM_010106	chr9	78478454	78481724	-	1774	1	Eef1a1||Eef1a1|NM_010106|	539.21	503.43	431.52	390.84	433.11	-0.266752	0.0392779	0.954123	Mm.138471	NM_010106	ENSMUSG00000037742	-	-	9|9 E1	eukaryotic translation elongation factor 1 alpha 1	protein-coding	no	no	459.622	yes
Idh3a	NM_029573	chr9	54586511	54604662	+	2383	1	Idh3a||Idh3a|NM_029573|	94.3	112.14	111.09	87.9	78.24	-0.360398	0.0392291	0.954123	Mm.279195	NM_029573	ENSMUSG00000032279	1110003P10Rik|1500012E04Rik|AA407078|AI316514	-	9|9 A5.3	isocitrate dehydrogenase 3 (NAD+) alpha	protein-coding	no	no	96.734	yes
Gnpda2	NM_001038015	chr5	69575001	69592304	-	1845	1	Gnpda2||Gnpda2|NM_001038015|	108.81	106.17	78.04	78.51	65.2	-0.442302	0.0391968	0.954123	Mm.33830	NM_027681	ENSMUSG00000029209	4921523I18Rik|4933412A11Rik|BB189630|GNPDA|Gnp2|Sb52|mKIAA4008	-	5|5 C3.1	glucosamine-6-phosphate deaminase 2	protein-coding	no	no	87.346	yes
Tspan3	NM_019793	chr9	56135884	56161070	-	1716	1	Tspan3||Tspan3|NM_019793|	275.65	314.94	316.76	242.36	271.97	-0.24865	0.0391188	0.954123	Mm.28484	NM_019793	ENSMUSG00000032324	1700055K04Rik|TM4-A|Tm4sf8	-	9|9 B	tetraspanin 3	protein-coding	no	no	284.336	yes
Fkbp7	NM_001355080	chr2	76663034	76673098	-	1005	1	Fkbp7||Fkbp7|NM_001355080|	64.08	52.49	50.5	41.82	36.33	-0.511273	0.0390691	0.954123	Mm.24720	NM_010222	ENSMUSG00000002732	23kDa|FKBP-7|FKBP23	-	2 C3|2 45.09 cM	FK506 binding protein 7	protein-coding	no	no	49.044	yes
Trrap	NM_001081362	chr5	144768794	144859778	+	12338	1	Trrap||Trrap|NM_001081362|	859.6	833.88	776.74	1074.4	893.23	0.244653	0.0392465	0.954123	Mm.273570	NM_001081362	ENSMUSG00000045482	AI481500	-	5|5 G2	transformation/transcription domain-associated protein	protein-coding	no	no	887.57	yes
Anp32a	NM_009672	chr9	62341343	62378805	+	2079	1	Anp32a||Anp32a|NM_009672|	241.8	274.38	291.97	214.2	240.31	-0.261689	0.0394025	0.954743	Mm.269088	NM_009672	ENSMUSG00000032249	Anp32|I1PP2A|LANP|PHAP1|W91701|pp32	-	9 B|9 33.68 cM	acidic (leucine-rich) nuclear phosphoprotein 32 family, member A	protein-coding	no	no	252.532	yes
Mrgpre	NM_175534	chr7	143778363	143784500	-	3758	1	Mrgpre||Mrgpre|NM_175534|	111.23	89.47	74.37	59.74	73.58	-0.466775	0.0394169	0.954743	Mm.183561	NM_175534	ENSMUSG00000048965	C130069N09Rik|Ebrt3|Mgrf|MrgE	-	7|7 F5	MAS-related GPR, member E	protein-coding	no	no	81.678	yes
Mal	NM_010762	chr2	127633226	127656695	-	2771	1	Mal||Mal|NM_010762|	18.13	58.46	69.78	70.83	90.35	0.702847	0.0397376	0.956476	Mm.39040	NM_010762	ENSMUSG00000027375	Mpv17|Vip17	-	2|2 F1	myelin and lymphocyte protein, T cell differentiation protein	protein-coding	no	no	61.51	yes
Egln2	NM_053208	chr7	27158658	27166802	-	2096	1	Egln2||Egln2|NM_053208|	199.48	162.24	238.72	256.01	242.17	0.297456	0.0396907	0.956476	Mm.29978	NM_053208	ENSMUSG00000058709	0610011A13Rik|C85656|Hif-p4h-1|Ier4|Phd1|SM-20	-	7 A3|7 15.83 cM	egl-9 family hypoxia-inducible factor 2	protein-coding	no	no	219.724	yes
Actb	NM_007393	chr5	142903115	142906754	-	1909	1	Actb||Actb|NM_007393|	1493.11	1498.36	1190.82	1119.63	1215.5	-0.27153	0.0397035	0.956476	Mm.328431	NM_007393	ENSMUSG00000029580	Actx|E430023M04Rik|beta-actin	-	5 G2|5 81.8 cM	actin, beta	protein-coding	no	no	1303.48	yes
Mir22hg	NR_030711	chr11	75461539	75466690	+	1761	1	Mir22hg||Mir22hg|NR_030711|	90.67	41.75	67.94	88.75	105.25	0.522612	0.0398295	0.956476	Mm.482242	NR_030711	ENSMUSG00000085148	2210403K04Rik|mir-22	-	11|11 B5	Mir22 host gene (non-protein coding)	ncRNA	no	no	78.872	yes
Nemp2	NM_001142647	chr1	52630705	52651919	+	3377	1	Nemp2||Nemp2|NM_001142647|	186.19	211.15	192.81	155.31	171.38	-0.279306	0.0398241	0.956476	Mm.83541	NM_172654	ENSMUSG00000043015	5330401P04Rik|9830163O08|Tmem194b	-	1|1 C1.1	nuclear envelope integral membrane protein 2	protein-coding	no	no	183.368	yes
Fam107a	NM_001360337	chr14	8296270	8309777	-	3328	1	Fam107a||Fam107a|NM_001360337|	21.76	39.37	37.64	51.2	47.5	0.562568	0.0396925	0.956476	Mm.256058	NM_183187	ENSMUSG00000021750	DRR1	-	14|14 A1	family with sequence similarity 107, member A	protein-coding	no	no	39.494	yes
BC106179	NR_152126	chr16	23221524	23225484	-	2644	1	BC106179||BC106179|NR_152126|	26.6	32.21	16.53	9.39	17.7	-0.890594	0.0396332	0.956476	Mm.326729	NR_152126		-	-	16|16 B1	cDNA sequence BC106179	ncRNA	no	no	20.486	yes
Eno3	NM_007933	chr11	70657176	70662513	+	1569	1	Eno3||Eno3|NM_007933|	103.97	107.37	102.83	55.47	97.8	-0.468743	0.0398978	0.957207	Mm.251322	NM_007933	ENSMUSG00000060600	Eno-3|MSE	-	11 B3|11 43.21 cM	enolase 3, beta muscle	protein-coding	no	no	93.488	yes
P2ry12	NM_001357008	chr3	59216271	59262985	-	2548	1	P2ry12||P2ry12|NM_001357008|	2144.76	2135.41	1669.17	1577.89	1723.12	-0.28152	0.0399528	0.957616	Mm.422675	NM_027571	ENSMUSG00000036353	2900079B22Rik|4921504D23Rik|P2Y12	-	3|3 D	purinergic receptor P2Y, G-protein coupled 12	protein-coding	no	no	1850.07	yes
Ikbkg	NM_010547	chrX	74429681	74453778	+	6795	1	Ikbkg||Ikbkg|NM_010547|	350.61	439.01	403.98	338.79	339.04	-0.243117	0.0405023	0.960243	Mm.12967	NM_010547	ENSMUSG00000004221	1110037D23Rik|AI848108|AI851264|AW124339|IKK[g]|NEMO	-	X|X A7.3	inhibitor of kappaB kinase gamma	protein-coding	no	no	374.286	yes
C5ar2	NM_176912	chr7	16234587	16244154	-	3517	1	C5ar2||C5ar2|NM_176912|	643.19	738.45	722.57	558.11	651.06	-0.227932	0.0403031	0.960243	Mm.239570	NM_176912	ENSMUSG00000074361	C5L2|E030029A11Rik|Gpr77	-	7|7 A2	complement component 5a receptor 2	protein-coding	no	no	662.676	yes
H2-Q6	NM_001368741	chr17	35424850	35430055	+	2167	1	H2-Q6||H2-Q6|NM_001368741|	135.41	118.1	152.41	147.63	199.32	0.337707	0.0406242	0.960243	Mm.439827	NM_207648	ENSMUSG00000073409	0610037M15Rik|H-2Q6|Qa-6|Qa6	-	17 B1|17 18.66 cM	histocompatibility 2, Q region locus 6	protein-coding	no	no	150.574	yes
Arl4d	NM_025404	chr11	101665541	101667832	+	1379	1	Arl4d||Arl4d|NM_025404|	54.4	31.02	43.15	58.03	66.13	0.520495	0.040627	0.960243	Mm.266840	NM_025404	ENSMUSG00000034936	1110036H21Rik|ARL6|AW456149|Arf4l|Arfl4|Arl5	-	11|11 D	ADP-ribosylation factor-like 4D	protein-coding	no	no	50.546	yes
Gatd1	NM_172116	chr7	141408184	141414125	-	1482	1	Gatd1||Gatd1|NM_172116|	130.57	169.4	157.92	117.77	129.47	-0.318134	0.0406564	0.960243	Mm.290953	NM_172116	ENSMUSG00000051007	BC023835|D230016J19Rik|Pddc1	-	7|7 F5	glutamine amidotransferase like class 1 domain containing 1	protein-coding	no	no	141.026	yes
Ralgapa2	NM_001033348	chr2	146241299	146512004	-	9529	1	Ralgapa2||Ralgapa2|NM_001033348|	123.32	140.77	132.21	184.33	147.16	0.319703	0.0403173	0.960243	Mm.222310	NM_001033348	ENSMUSG00000037110	A230067G21Rik|AS250|BC053994|RGC2|pp250	-	2|2 G1	Ral GTPase activating protein, alpha subunit 2 (catalytic)	protein-coding	no	no	145.558	yes
Tcf20	NM_001114140	chr15	82808626	82912134	-	7339	1	Tcf20||Tcf20|NM_001114140|	570.65	462.87	415.92	736.46	507.62	0.351429	0.0406712	0.960243	Mm.252156	NM_013836	ENSMUSG00000041852	2810438H08Rik|SPBP|mKIAA0292	-	15|15 E1	transcription factor 20	protein-coding	no	no	538.704	yes
Gm28043	NR_132314	chr17	29614789	29705979	+	9173	1	Gm28043||Gm28043|NR_132314|	427.98	442.59	487.53	548.72	509.48	0.211786	0.0406524	0.960243	Mm.305994	NR_132314		Rnf8-cmtr1	-	17 A3.3|17	predicted gene, 28043	ncRNA	no	no	483.26	yes
Ncor2	NM_011424	chr5	125017153	125179214	-	8652	1	Ncor2||Ncor2|NM_011424|	1088.1	1062.93	1099.01	1340.65	1189.42	0.211377	0.0403592	0.960243	Mm.278646	NM_011424	ENSMUSG00000029478	N-CoR|SMRT|SMRTe	-	5|5 G1.1	nuclear receptor co-repressor 2	protein-coding	no	no	1156.02	yes
Ldhb	NM_008492	chr6	142490249	142507957	-	1289	1	Ldhb||Ldhb|NM_008492|	305.88	300.63	290.13	229.56	273.84	-0.26066	0.0401682	0.960243	Mm.9745	NM_008492	ENSMUSG00000030246	AI790582|H-Ldh|LDH-B|LDH-H|Ldh-2|Ldh2	-	6 G2|6 74.17 cM	lactate dehydrogenase B	protein-coding	no	no	280.008	yes
Exosc2	NM_144886	chr2	31670715	31681352	+	1672	1	Exosc2||Exosc2|NM_144886|	42.31	50.1	46.82	64.86	63.34	0.454576	0.0405798	0.960243	Mm.150972	NM_144886	ENSMUSG00000039356	Rrp4	-	2|2 B	exosome component 2	protein-coding	no	no	53.486	yes
Eif2s2	NM_026030	chr2	154871410	154892906	-	2496	1	Eif2s2||Eif2s2|NM_026030|	151.12	165.82	150.57	123.74	131.33	-0.298275	0.0407345	0.960839	Mm.377134	NM_026030	ENSMUSG00000074656	2810026E11Rik|38kDa|AA408636|AA571381|AA986487|AW822225|D2Ertd303e|EIF2|EIF2B	-	2 H1|2 76.89 cM	eukaryotic translation initiation factor 2, subunit 2 (beta)	protein-coding	no	no	144.516	yes
Lamc1	NM_010683	chr1	153218922	153332786	-	7567	1	Lamc1||Lamc1|NM_010683|	99.14	121.68	99.16	148.49	123.88	0.348572	0.0409576	0.961608	Mm.1249	NM_010683	ENSMUSG00000026478	Lamb2	-	1 G3|1 65.3 cM	laminin, gamma 1	protein-coding	no	no	118.47	yes
Hist1h1c	NM_015786	chr13	23738807	23739531	+	724	1	H1f2||H1f2|NM_015786|	176.51	127.65	162.51	100.7	140.64	-0.383967	0.0408752	0.961608	Mm.193539	NM_015786	ENSMUSG00000036181	0610008C09Rik|H1.2|H1c|H1f2|H1var1|His1a	-	13|13 A3.1	histone cluster 1, H1c	protein-coding	no	no	141.602	yes
Nmt2	NM_008708	chr2	3284212	3328877	+	4434	1	Nmt2||Nmt2|NM_008708|	130.57	138.38	162.51	176.65	177.9	0.282331	0.0409469	0.961608	Mm.65021	NM_008708	ENSMUSG00000026643	A930001K02Rik|AI605445|AU044698|hNMT-2	-	2|2 A1	N-myristoyltransferase 2	protein-coding	no	no	157.202	yes
Prdm10	NM_001368846	chr9	31313427	31381731	+	6714	1	Prdm10||Prdm10|NM_001368846|	124.53	180.14	138.64	249.18	151.82	0.433298	0.0408053	0.961608	Mm.335039	NM_199315	ENSMUSG00000042496	Gm1112|tristanin	-	9|9 A4	PR domain containing 10	protein-coding	no	no	168.862	yes
Klf11	NM_178357	chr12	24651371	24662782	+	3975	1	Klf11||Klf11|NM_178357|	207.95	161.05	276.36	271.37	279.42	0.338206	0.0410234	0.961967	Mm.9616	NM_178357	ENSMUSG00000020653	9830142A17|D12Ertd427e|Tieg2|Tieg2b|Tieg3	-	12 A1.3|12 8.49 cM	Kruppel-like factor 11	protein-coding	no	no	239.23	yes
Bod1l	NM_001081422	chr5	41787540	41844315	-	10485	1	Bod1l||Bod1l|NM_001081422|	736.28	743.22	844.68	890.07	909.06	0.202024	0.04116	0.962064	Mm.158726	NM_001081422	ENSMUSG00000061755	A230054D04Rik|AI853319|FAM44A|mKIAA1327	-	5|5 B3	biorientation of chromosomes in cell division 1-like	protein-coding	no	no	824.662	yes
Setd1b	NM_001040398	chr5	123142193	123168630	+	8825	1	Setd1b||Setd1b|NM_001040398|	876.52	986.58	968.63	1249.34	998.48	0.240461	0.041148	0.962064	Mm.250391	NM_177581	ENSMUSG00000038384	AA516740|BC035291|KMT2G|mKIAA1076	-	5|5 F	SET domain containing 1B	protein-coding	no	no	1015.91	yes
Strn3	NM_052973	chr12	51608541	51691914	-	4129	1	Strn3||Strn3|NM_052973|	446.12	453.33	449.89	368.66	410.75	-0.219807	0.0411676	0.962064	Mm.65979	NM_052973	ENSMUSG00000020954	Gs2na|SG2NA	-	12|12 B3	striatin, calmodulin binding protein 3	protein-coding	no	no	425.75	yes
Tbc1d23	NM_001358433	chr16	57168864	57231466	-	3658	1	Tbc1d23||Tbc1d23|NM_001358433|	427.98	474.8	459.99	339.64	431.25	-0.251507	0.0419372	0.96246	Mm.257819	NM_026254	ENSMUSG00000022749	4930451A13Rik|AU015720|AU043671|AU043778|D030022P07Rik|W51689	-	16|16 C1.1	TBC1 domain family, member 23	protein-coding	no	no	426.732	yes
Gm6548	NR_003363	chr17	78850505	78852544	-	2039	1	Gm6548||Gm6548|NR_003363|	206.74	272	258	209.93	197.46	-0.281694	0.0417471	0.96246	Mm.311918	NR_003363		EG625054	-	17|17 E3	eukaryotic translation elongation factor 1 alpha 1 pseudogene	pseudo	no	no	228.826	yes
Clcn3	NM_173874	chr8	60910389	60983311	-	5754	1	Clcn3||Clcn3|NM_173874|	469.09	455.71	466.41	606.75	495.51	0.238403	0.0415622	0.96246	Mm.25263	NM_007711	ENSMUSG00000004319	Clc3	-	8 B3.1|8 30.9 cM	chloride channel, voltage-sensitive 3	protein-coding	no	no	498.694	yes
Ppp1r26	NM_001368159	chr2	28447070	28455508	+	5747	1	Ppp1r26||Ppp1r26|NM_001368159|	107.6	122.88	108.34	85.34	94.07	-0.341303	0.0418072	0.96246	Mm.330095	NM_001005420	ENSMUSG00000035829	Gm347|Kiaa0649|mKIAA0649	-	2|2 A3	protein phosphatase 1, regulatory subunit 26	protein-coding	no	no	103.646	yes
Gpr37l1	NM_134438	chr1	135160250	135167681	-	2250	1	Gpr37l1||Gpr37l1|NM_134438|	35.06	59.65	89.98	78.51	107.11	0.56561	0.0412858	0.96246	Mm.272290	NM_134438	ENSMUSG00000026424	AW047233|CAG-18|D0Kist8	-	1|1 E4	G protein-coupled receptor 37-like 1	protein-coding	no	no	74.062	yes
4833438C02Rik	NR_152247	chr19	46303585	46305629	-	1785	1	4833438C02Rik||4833438C02Rik|NR_152247|	54.4	70.38	79.88	45.23	54.02	-0.482392	0.0419059	0.96246	Mm.439920	NR_152247	ENSMUSG00000118087	AI837757	-	19|19 C3	RIKEN cDNA 4833438C02 gene	ncRNA	no	no	60.782	yes
Ciart	NM_001033302	chr3	95878505	95882228	-	1384	1	Ciart||Ciart|NM_001033302|	71.33	39.37	74.37	76.8	101.52	0.507227	0.0415866	0.96246	Mm.331218	NM_001033302	ENSMUSG00000038550	Chrono|Gm129	-	3|3 F2.1	circadian associated repressor of transcription	protein-coding	no	no	72.678	yes
Rab3d	NM_001324531	chr9	21907492	21918183	-	3816	1	Rab3d||Rab3d|NM_001324531|	35.06	40.56	42.23	85.34	38.19	0.64474	0.0418737	0.96246	Mm.260157	NM_031874	ENSMUSG00000019066	C130057E11Rik	-	9|9 A3	RAB3D, member RAS oncogene family	protein-coding	no	no	48.276	yes
Nedd4	NM_010890	chr9	72662331	72749850	+	5455	1	Nedd4||Nedd4|NM_010890|	15.72	26.25	21.12	30.72	35.39	0.63652	0.0419585	0.96246	Mm.279923	NM_010890	ENSMUSG00000032216	AA959633|AL023035|AU019897|E430025J12Rik|EG639396|Gm7265|KIAA0093|Nedd4-1|Nedd4a	-	9 D|9 40.08 cM	neural precursor cell expressed, developmentally down-regulated 4	protein-coding	no	no	25.84	yes
Aaas	NM_153416	chr15	102338247	102350759	-	1785	1	Aaas||Aaas|NM_153416|	70.12	63.23	80.8	53.76	53.09	-0.436341	0.0418428	0.96246	Mm.352946	NM_153416	ENSMUSG00000036678	AAA|ADRACALA|D030041N15Rik|GL003	-	15|15 F3	achalasia, adrenocortical insufficiency, alacrimia	protein-coding	no	no	64.2	yes
Ensa	NM_001026212	chr3	95624980	95630493	+	2271	1	Ensa||Ensa|NM_001026212|	317.97	291.08	291.97	206.52	285.94	-0.301748	0.0414057	0.96246	Mm.241365	NM_019561	ENSMUSG00000038619	1700020C18Rik|2610007F17Rik|AI451924	-	3|3 F2.1	endosulfine alpha	protein-coding	no	no	278.696	yes
Cdc42	NM_009861	chr4	137319696	137357759	-	2136	1	Cdc42||Cdc42|NM_009861|	969.61	1054.58	908.95	817.53	868.08	-0.227349	0.0413504	0.96246	Mm.1022	NM_009861	ENSMUSG00000006699	AI747189|AU018915	-	4 D3|4 69.83 cM	cell division cycle 42	protein-coding	no	no	923.75	yes
Tmem30a	NM_133718	chr9	79768941	79793430	-	3647	1	Tmem30a||Tmem30a|NM_133718|	762.88	764.69	719.82	657.1	647.33	-0.211801	0.0415665	0.96246	Mm.486324	NM_133718	ENSMUSG00000032328	2010200I23Rik|AW540225|Cdc50a|D9Wsu20e	-	9 E1|9 43.82 cM	transmembrane protein 30A	protein-coding	no	no	710.364	yes
Kdm8	NM_029842	chr7	125444620	125462268	+	2429	1	Kdm8||Kdm8|NM_029842|	19.34	25.05	25.71	40.96	31.67	0.619754	0.0415454	0.96246	Mm.307239	NM_029842	ENSMUSG00000030752	3110005O21Rik|Jmjd5	-	7|7 F3	lysine (K)-specific demethylase 8	protein-coding	no	no	28.546	yes
B3glct	NM_001081204	chr5	149678230	149762599	+	4541	1	B3glct||B3glct|NM_001081204|	71.33	106.17	95.49	142.51	101.52	0.413808	0.0416331	0.96246	Mm.45060	NM_001081204	ENSMUSG00000051950	B3galtl|Gm1057|beta3Glc-T	-	5|5 G3	beta-3-glucosyltransferase	protein-coding	no	no	103.404	yes
Aste1	NR_152139	chr9	105395362	105405756	+	2831	1	Aste1||Aste1|NR_152139|	48.36	38.17	49.58	23.04	37.26	-0.613075	0.0416677	0.96246	Mm.84941	NM_025651	ENSMUSG00000032567	1100001A21Rik|AV006403	-	9|9 F1	asteroid homolog 1	protein-coding	no	no	39.282	yes
Selenof	NM_053102	chr3	144570427	144597676	+	1500	1	Selenof||Selenof|NM_053102|	354.24	365.05	309.41	271.37	304.57	-0.262524	0.0414693	0.96246	Mm.29812	NM_053102	ENSMUSG00000037072	9430015P09Rik|Sep15	-	3|3 H2	selenoprotein F	protein-coding	no	no	320.928	yes
Pank4	NM_001305804	chr4	154964123	154980938	+	2677	1	Pank4||Pank4|NM_001305804|	151.12	159.86	205.66	232.97	196.53	0.301028	0.042529	0.962682	Mm.30042	NM_172990	ENSMUSG00000029056	D030031I12Rik|R75150	-	4|4 E2	pantothenate kinase 4	protein-coding	no	no	189.228	yes
Baz2a	NM_054078	chr10	128092783	128129303	+	8310	1	Baz2a||Baz2a|NM_054078|	678.25	781.39	798.78	978.82	806.61	0.234641	0.0422159	0.962682	Mm.252213	NM_054078	ENSMUSG00000040054	AA415431|C030005G16Rik|C78388|Tip5|Walp3|mKIAA0314	-	10|10 D3	bromodomain adjacent to zinc finger domain, 2A	protein-coding	no	no	808.77	yes
Hacd3	NM_021345	chr9	64986983	65021717	-	2712	1	Hacd3||Hacd3|NM_021345|	346.98	363.85	374.6	317.45	309.23	-0.219698	0.0421979	0.962682	Mm.308180	NM_021345	ENSMUSG00000033629	4930523M17Rik|AW742319|B-ind1|Hcad3|Hspc121|Ptplad1	-	9|9 C	3-hydroxyacyl-CoA dehydratase 3	protein-coding	no	no	342.422	yes
Gm10790	NR_033545	chr13	41865915	41913092	+	1683	1	Gm10790||Gm10790|NR_033545|	458.21	580.97	497.63	436.07	436.83	-0.24232	0.0425101	0.962682	Mm.387093	NR_033545	ENSMUSG00000113856	-	-	13 A4|13	predicted gene 10790	ncRNA	no	no	481.942	yes
Ntrk2	NM_008745	chr13	58806569	58937031	+	7005	1	Ntrk2||Ntrk2|NM_008745|	13.3	39.37	32.13	39.26	53.09	0.684775	0.0424423	0.962682	Mm.130054	NM_008745	ENSMUSG00000055254	GP145-TrkB/GP95-TrkB|Tkrb|trk-B|trkB	-	13 B1|13 31.2 cM	neurotrophic tyrosine kinase, receptor, type 2	protein-coding	no	no	35.43	yes
Myo5a	NM_010864	chr9	75071206	75223687	+	11602	1	Myo5a||Myo5a|NM_010864|	184.98	232.63	231.37	267.96	254.28	0.257872	0.0423137	0.962682	Mm.3645	NM_010864	ENSMUSG00000034593	9630007J19Rik|AI413174|AI661011|Dbv|MVa|Myo5|MyoVA|Sev-1|d|d-120J|flail|flr	-	9 D|9 42.26 cM	myosin VA	protein-coding	no	no	234.244	yes
Gpr34	NM_011823	chrX	13632769	13640858	+	1893	1	Gpr34||Gpr34|NM_011823|	1491.9	1439.91	1188.07	1144.37	1174.51	-0.259514	0.0422593	0.962682	Mm.487326	NM_011823	ENSMUSG00000040229	Lypsr1	-	X|X A1.1	G protein-coupled receptor 34	protein-coding	no	no	1287.75	yes
Casp4	NM_007609	chr9	5308849	5336791	+	1426	1	Casp4||Casp4|NM_007609|	129.36	104.98	107.42	146.78	140.64	0.328859	0.0424914	0.962682	Mm.1569	NM_007609	ENSMUSG00000033538	CASP-11|CASP-4|Casp11|Caspl|ich-3	-	9 A1|9 2.46 cM	caspase 4, apoptosis-related cysteine peptidase	protein-coding	no	no	125.836	yes
Eif2s3y	NM_012011	chrY	1010595	1028594	+	1761	1	Eif2s3y||Eif2s3y|NM_012011|	194.65	218.31	201.07	164.7	176.97	-0.271526	0.0422219	0.962682	Mm.250909	NM_012011	ENSMUSG00000069049	Eif-2gy|Spy|Tfy	-	Y|Y A1	eukaryotic translation initiation factor 2, subunit 3, structural gene Y-linked	protein-coding	no	no	191.14	yes
Tgfbr3l	NM_001195258	chr8	4248214	4251423	+	1062	1	Tgfbr3l||Tgfbr3l|NM_001195258|	21.76	35.79	33.97	13.65	23.29	-0.748227	0.0424633	0.962682	Mm.439193	NM_001195258	ENSMUSG00000089736	Gm14378	-	8|8 A1.1	transforming growth factor, beta receptor III-like	protein-coding	no	no	25.692	yes
Ddi2	NM_001017966	chr4	141683563	141723419	-	3520	1	Ddi2||Ddi2|NM_001017966|	558.56	499.85	520.58	641.74	595.17	0.221105	0.0424334	0.962682	Mm.393721	NM_001017966	ENSMUSG00000078515	1110056G13Rik|1700027M01Rik|9130022E05Rik|AI604911|AU040698	-	4|4 E1	DNA-damage inducible protein 2	protein-coding	no	no	563.18	yes
Phldb1	NM_153537	chr9	44686308	44735198	-	5418	1	Phldb1||Phldb1|NM_153537|	164.42	190.87	153.33	201.4	217.02	0.296082	0.0425814	0.963003	Mm.28639	NM_153537	ENSMUSG00000048537	AU041016|D330037A14Rik|Ll5a	-	9|9 A5.2	pleckstrin homology like domain, family B, member 1	protein-coding	no	no	185.408	yes
Magt1	NM_001190409	chrX	105968085	106011802	-	4407	1	Magt1||Magt1|NM_001190409|	564.6	586.94	626.17	479.6	550.47	-0.21674	0.0426627	0.963978	Mm.275943	NM_025952	ENSMUSG00000031232	2410001C15Rik|2610529C04Rik|2810482I07Rik|IAG2|IAP	-	X|X D	magnesium transporter 1	protein-coding	no	no	561.556	yes
Jund	NM_001286944	chr8	70697739	70700616	+	2877	1	Jund||Jund|NM_001286944|	1647.86	1593.8	1320.28	1234.83	1332.86	-0.259915	0.042704	0.964048	Mm.419851	NM_010592	ENSMUSG00000071076	Jund1	-	8 B3.3|8 34.15 cM	jun D proto-oncogene	protein-coding	no	no	1425.93	yes
Sat1	NM_001291865	chrX	155213126	155216449	-	1265	1	Sat1||Sat1|NM_001291865|	616.59	583.36	496.71	467.65	488.99	-0.254018	0.0430193	0.965595	Mm.2734	NM_009121	ENSMUSG00000025283	AA617398|SSAT|Sat	-	X F3|X 72.38 cM	spermidine/spermine N1-acetyl transferase 1	protein-coding	no	no	530.66	yes
Cotl1	NM_028071	chr8	119809214	119840579	-	1632	1	Cotl1||Cotl1|NM_028071|	845.09	813.6	706.96	625.52	714.4	-0.249217	0.0430906	0.965595	Mm.393405	NM_028071	ENSMUSG00000031827	1810074P22Rik|2010004C08Rik|Clp	-	8|8 E1	coactosin-like 1 (Dictyostelium)	protein-coding	no	no	741.114	yes
Mettl23	NM_028865	chr11	116843515	116849740	+	1030	1	Mettl23||Mettl23|NM_028865|	51.99	57.26	61.52	36.7	45.64	-0.48697	0.0431168	0.965595	Mm.429312	NM_028865	ENSMUSG00000090266	1110005A03Rik|1500035B17Rik|4933424L15Rik	-	11|11 E2	methyltransferase like 23	protein-coding	no	no	50.622	yes
Dnase1l1	NM_027109	chrX	74273217	74281626	-	1500	1	Dnase1l1||Dnase1l1|NM_027109|	20.55	39.37	44.07	59.74	46.57	0.592205	0.0431037	0.965595	Mm.20169	NM_027109	ENSMUSG00000019088	2310005K03Rik|AI324885|Dnase1ll|Dnasex|Dnl1ll|G4.8	-	X A7.3|X 37.94 cM	deoxyribonuclease 1-like 1	protein-coding	no	no	42.06	yes
Tuba4a	NM_001313724	chr1	75214972	75219294	-	2324	1	Tuba4a||Tuba4a|NM_001313724|	77.38	31.02	76.21	79.36	108.98	0.591453	0.0430644	0.965595	Mm.1155	NM_009447	ENSMUSG00000026202	M[a]4|Tuba4	-	1|1 C4	tubulin, alpha 4A	protein-coding	no	no	74.59	yes
Ino80	NM_026574	chr2	119373043	119477687	-	6282	1	Ino80||Ino80|NM_026574|	299.83	340	366.34	390.84	400.51	0.223321	0.0428164	0.965595	Mm.330496	NM_026574	ENSMUSG00000034154	2310079N15Rik|4632409L19Rik|Inoc1	-	2|2 E5	INO80 complex subunit	protein-coding	no	no	359.504	yes
Topbp1	NM_176979	chr9	103305327	103350427	+	5056	1	Topbp1||Topbp1|NM_176979|	177.72	174.17	134.05	115.21	138.78	-0.359333	0.0433707	0.967009	Mm.259893	NM_176979	ENSMUSG00000032555	1110031N14Rik|2810429C13Rik|AI256758|D430026L04Rik|mKIAA0259	-	9|9 F1	topoisomerase (DNA) II binding protein 1	protein-coding	no	no	147.986	yes
Map3k11	NM_022012	chr19	5689131	5702864	+	3780	1	Map3k11||Map3k11|NM_022012|	674.62	621.53	701.46	809	744.2	0.209307	0.0435403	0.967009	Mm.185026	NM_022012	ENSMUSG00000004054	2610017K16Rik|Mlk3|PTK1|SPRK	-	19 A|19 4.34 cM	mitogen-activated protein kinase kinase kinase 11	protein-coding	no	no	710.162	yes
Gng10	NM_025277	chr4	59035156	59041899	+	1115	1	Gng10||Gng10|NM_025277|	376	382.94	344.3	320.01	308.3	-0.236325	0.0433158	0.967009	Mm.41780	NM_025277	ENSMUSG00000038607	AV006524	-	4 B3|4 32.36 cM	guanine nucleotide binding protein (G protein), gamma 10	protein-coding	no	no	346.31	yes
Nav2	NM_001111016	chr7	48959073	49610088	+	10979	1	Nav2||Nav2|NM_001111016|	805.19	738.45	717.06	249.18	752.58	-0.607509	0.0435273	0.967009	Mm.333881	NM_175272	ENSMUSG00000052512	5330421F07Rik|AU067780|BQ960892|HELAD1|POMFIL2|RAINB1|RAINB2|Unc53H2|mKIAA3015	-	7|7 B4	neuron navigator 2	protein-coding	no	no	652.492	yes
Apod	NM_001301353	chr16	31296192	31314808	-	2059	1	Apod||Apod|NM_001301353|	7.25	23.86	23.87	34.99	27.94	0.749095	0.0434512	0.967009	Mm.2082	NM_007470	ENSMUSG00000022548	-	-	16 B2|16 21.41 cM	apolipoprotein D	protein-coding	no	no	23.582	yes
Ang	NM_007447	chr14	51096000	51102009	+	1095	1	Ang||Ang|NM_007447|	380.83	452.13	405.82	342.2	366.05	-0.233412	0.0435164	0.967009	Mm.202665	NM_007447	ENSMUSG00000072115	AI385586|Ang1|Rnase5|Rnase5a	-	14 C1|14 26.37 cM	angiogenin, ribonuclease, RNase A family, 5	protein-coding	no	no	389.406	yes
Ifrd1	NM_013562	chr12	40203129	40223189	-	1793	1	Ifrd1||Ifrd1|NM_013562|	396.55	292.28	335.12	388.28	448.94	0.280516	0.04344	0.967009	Mm.168	NM_013562	ENSMUSG00000001627	Ifnl|PC4|Tis7	-	12 B1|12 18.06 cM	interferon-related developmental regulator 1	protein-coding	no	no	372.234	yes
Zfp407	NM_001033341	chr18	84207702	84589504	-	7891	1	Zfp407||Zfp407|NM_001033341|	183.77	149.12	152.41	221.02	183.49	0.315453	0.0435265	0.967009	Mm.329575	NM_001033341	ENSMUSG00000048410	6430585N13Rik|Gm333|Gm334|Gm948|ZNF407	-	18|18 E4	zinc finger protein 407	protein-coding	no	no	177.962	yes
Canx	NM_001110499	chr11	50293957	50325673	-	4256	1	Canx||Canx|NM_001110499|	1302.09	1356.4	1166.95	1071.84	1126.08	-0.228449	0.0436564	0.968228	Mm.248827	NM_007597	ENSMUSG00000020368	1110069N15Rik|AI988026|Cnx|D11Ertd153e	-	11 B1.3|11 30.46 cM	calnexin	protein-coding	no	no	1204.67	yes
Synj2	NR_151772	chr17	5941280	6040191	+	6381	1	Synj2||Synj2|NR_151772|	93.09	73.96	78.96	104.96	107.11	0.36274	0.0438421	0.969791	Mm.236068	NM_011523	ENSMUSG00000023805	AI481647|SJ2|mKIAA0348	-	17 A1|17 3.59 cM	synaptojanin 2	protein-coding	no	no	91.616	yes
Tmem59	NM_029565	chr4	107178630	107200996	+	1529	1	Tmem59||Tmem59|NM_029565|	398.97	433.05	400.31	347.32	362.32	-0.222398	0.0438313	0.969791	Mm.291192	NM_029565	ENSMUSG00000028618	1110001M20Rik|3110046P06Rik|AI256529|D4Ertd20e|MTDCF1|ORF18	-	4 C7|4 50.12 cM	transmembrane protein 59	protein-coding	no	no	388.394	yes
Tnrc18	NM_001122730	chr5	142724602	142817662	-	10527	1	Tnrc18||Tnrc18|NM_001122730|	1636.98	1449.45	1400.16	1941.42	1643.95	0.247379	0.0439215	0.969846	Mm.354649	NM_178242	ENSMUSG00000039477	BC025631|EG381742|Zfp469	-	5|5 G2	trinucleotide repeat containing 18	protein-coding	no	no	1614.39	yes
Ap1s2	NM_001290379	chrX	163909017	163933666	+	2215	1	Ap1s2||Ap1s2|NM_001290379|	178.93	188.49	180.87	144.22	160.2	-0.275532	0.0439213	0.969846	Mm.426783	NM_026887	ENSMUSG00000031367	1500012A13Rik|AI853648|EST1	-	X|X F5	adaptor-related protein complex 1, sigma 2 subunit	protein-coding	no	no	170.542	yes
Rpl15	NM_001359897	chr14	18267823	18270981	-	1965	1	Rpl15||Rpl15|NM_001359897|	67.7	54.88	71.61	105.82	72.65	0.450848	0.0441213	0.971208	Mm.2050	NM_025586	ENSMUSG00000012405	2510008H07Rik	-	14 A2|14	ribosomal protein L15	protein-coding	no	no	74.532	yes
Fra10ac1	NM_001081075	chr19	38188479	38224152	-	1391	1	Fra10ac1||Fra10ac1|NM_001081075|	13.3	20.28	30.3	29.01	41.91	0.689087	0.0441371	0.971208	Mm.30607	NM_027466	ENSMUSG00000054237	5730455O13Rik|AI448293	-	19|19 C2	FRA10AC1 homolog (human)	protein-coding	no	no	26.96	yes
Fam193b	NM_145382	chr13	55539316	55571120	-	4320	1	Fam193b||Fam193b|NM_145382|	854.76	957.95	961.29	676.72	892.3	-0.251173	0.0440537	0.971208	Mm.35661	NM_145382	ENSMUSG00000021495	IRIZIO|Kiaa1931	-	13|13 B1	family with sequence similarity 193, member B	protein-coding	no	no	868.604	yes
Txnip	NM_001009935	chr3	96557957	96561857	+	2786	1	Txnip||Txnip|NM_001009935|	2334.57	2224.88	1904.21	1735.76	1920.58	-0.253065	0.0445022	0.976687	Mm.410189	NM_023719	ENSMUSG00000038393	1200008J08Rik|AA682105|Hyplip1|THIF|Tbp-2|VDUP1	-	3 F2.1|3 41.93 cM	thioredoxin interacting protein	protein-coding	no	no	2024	yes
Srpk3	NM_019684	chrX	73774405	73778924	+	1951	1	Srpk3||Srpk3|NM_019684|	162.01	193.26	187.3	231.26	207.71	0.268075	0.0444779	0.976687	Mm.111904	NM_019684	ENSMUSG00000002007	Mssk1|Stk23	-	X|X A7.3	serine/arginine-rich protein specific kinase 3	protein-coding	no	no	196.308	yes
Hoxb4	NM_010459	chr11	96318267	96321638	+	2563	1	Hoxb4||Hoxb4|NM_010459|	39.9	42.95	51.42	34.99	27.01	-0.543112	0.0447742	0.976797	Mm.3546	NM_010459	ENSMUSG00000038692	Hox-2.6	-	11 D|11 59.83 cM	homeobox B4	protein-coding	no	no	39.254	yes
Rnf187	NM_022423	chr11	58932288	58938906	-	1932	1	Rnf187||Rnf187|NM_022423|	436.45	480.77	421.42	383.16	385.61	-0.22553	0.0451534	0.976797	Mm.249986	NM_022423	ENSMUSG00000020496	2410016F01Rik|AB030190|RACO-1	-	11|11 B1.3	ring finger protein 187	protein-coding	no	no	421.482	yes
Atp1b3	NM_007502	chr9	96332656	96364431	-	1969	1	Atp1b3||Atp1b3|NM_007502|	435.24	470.03	461.82	345.62	433.11	-0.24146	0.044819	0.976797	Mm.424	NM_007502	ENSMUSG00000032412	AA409958|AI664000|AW212096	-	9 E3.3|9 50.31 cM	ATPase, Na+/K+ transporting, beta 3 polypeptide	protein-coding	no	no	429.164	yes
Urb1	NM_029497	chr16	90751527	90810413	-	7288	1	Urb1||Urb1|NM_029497|	153.54	184.91	159.76	205.66	199.32	0.278037	0.0447789	0.976797	Mm.328688	NM_029497	ENSMUSG00000039929	4921511H13Rik|5730405K23Rik|AA670781|AI645590|mKIAA0539	-	16|16 C3.3	URB1 ribosome biogenesis 1 homolog (S. cerevisiae)	protein-coding	no	no	180.638	yes
Mpeg1	NM_010821	chr19	12460770	12465285	+	4342	1	Mpeg1||Mpeg1|NM_010821|	3399.7	3373.71	2736.96	2621.56	2739.29	-0.25858	0.0450145	0.976797	Mm.3999	NM_010821	ENSMUSG00000046805	MPS1|Mpg-1|P-2	-	19|19 A	macrophage expressed gene 1	protein-coding	no	no	2974.24	yes
Jun	NM_010591	chr4	95049036	95052222	-	3186	1	Jun||Jun|NM_010591|	3088.98	2859.54	2394.5	2235.84	2439.38	-0.267554	0.0451651	0.976797	Mm.275071	NM_010591	ENSMUSG00000052684	AP-1|Junc|c-jun	-	4 C5|4 43.34 cM	jun proto-oncogene	protein-coding	no	no	2603.65	yes
Rab2b	NM_172601	chr14	52261759	52279395	-	2741	1	Rab2b||Rab2b|NM_172601|	174.1	202.8	185.46	130.57	174.17	-0.313702	0.0448421	0.976797	Mm.32870	NM_172601	ENSMUSG00000022159	1500012D09Rik|4930528G15Rik|A230002G14|D530043M21Rik	-	14|14 C2	RAB2B, member RAS oncogene family	protein-coding	no	no	173.42	yes
Pkd1	NM_013630	chr17	24549950	24596514	+	14079	1	Pkd1||Pkd1|NM_013630|	1276.7	1225.18	1126.55	1661.52	1270.45	0.264196	0.0451241	0.976797	Mm.30435	NM_013630	ENSMUSG00000032855	PC1|mFLJ00285	-	17 A3.3|17 12.4 cM	polycystin 1, transient receptor poteintial channel interacting	protein-coding	no	no	1312.08	yes
Atxn7	NM_139227	chr14	14012491	14107301	+	6829	1	Atxn7||Atxn7|NM_139227|	434.03	478.38	495.79	573.47	522.52	0.211089	0.0446589	0.976797	Mm.133625	NM_139227	ENSMUSG00000021738	A430107N12Rik|AI627028|Sca7|ataxin-7	-	14|14 A1	ataxin 7	protein-coding	no	no	500.838	yes
Slc44a2	NM_001359227	chr9	21320719	21355028	+	3584	1	Slc44a2||Slc44a2|NM_001359227|	834.21	889.95	744.61	663.07	744.2	-0.239456	0.0450118	0.976797	Mm.148425	NM_152808	ENSMUSG00000057193	1110028E10Rik|CTL2	-	9|9 A3	solute carrier family 44, member 2	protein-coding	no	no	775.208	yes
Fmo5	NM_001161765	chr3	97628838	97655287	+	5270	1	Fmo5||Fmo5|NM_001161765|	166.84	214.73	198.32	152.75	166.72	-0.288404	0.0450374	0.976797	Mm.385180	NM_010232	ENSMUSG00000028088	5033418D19Rik|AI195026	-	3|3 F2.2	flavin containing monooxygenase 5	protein-coding	no	no	179.872	yes
Cdc42ep4	NM_020006	chr11	113726850	113751160	-	3244	1	Cdc42ep4||Cdc42ep4|NM_020006|	221.25	195.65	250.65	261.99	274.77	0.252479	0.0450733	0.976797	Mm.293378	NM_020006	ENSMUSG00000041598	1500041M20Rik|Borg4|CEP4	-	11|11 E2	CDC42 effector protein (Rho GTPase binding) 4	protein-coding	no	no	240.862	yes
Kxd1	NM_029366	chr8	70513396	70523180	-	1207	1	Kxd1||Kxd1|NM_029366|	117.27	149.12	150.57	116.06	108.98	-0.318851	0.0450139	0.976797	Mm.482129	NM_029366	ENSMUSG00000055553	0610030B01Rik|2810422J05Rik|C78305	-	8|8 B3.3	KxDL motif containing 1	protein-coding	no	no	128.4	yes
Amacr	NM_008537	chr15	10981756	10996624	+	2566	1	Amacr||Amacr|NM_008537|	48.36	33.4	55.09	22.19	37.26	-0.645732	0.045208	0.976887	Mm.2787	NM_008537	ENSMUSG00000022244	Macr1	-	15|15 A1	alpha-methylacyl-CoA racemase	protein-coding	no	no	39.26	yes
Fth1	NM_010239	chr19	9982646	9985111	+	935	1	Fth1||Fth1|NM_010239|	625.05	600.06	495.79	454.85	509.48	-0.263881	0.0452752	0.977502	Mm.1776	NM_010239	ENSMUSG00000024661	FHC|Fth|HFt|MFH	-	19 A|19 6.23 cM	ferritin heavy polypeptide 1	protein-coding	no	no	537.046	yes
Fam104a	NM_138598	chr11	113661319	113684151	-	2610	1	Fam104a||Fam104a|NM_138598|	145.08	150.31	154.25	199.69	168.59	0.287152	0.0453234	0.977708	Mm.351688	NM_138598	ENSMUSG00000041629	D11Wsu99e	-	11 E2|11 79.12 cM	family with sequence similarity 104, member A	protein-coding	no	no	163.584	yes
Trf	NM_133977	chr9	103208876	103230286	-	2299	1	Trf||Trf|NM_133977|	1002.26	978.23	840.09	768.04	838.27	-0.241413	0.0454609	0.979835	Mm.37214	NM_133977	ENSMUSG00000032554	AI266983|Cd176|HP|Tf|Tfn|hpx	-	9 F1|9 55.03 cM	transferrin	protein-coding	no	no	885.378	yes
Ern1	NM_023913	chr11	106397620	106487796	-	3933	1	Ern1||Ern1|NM_023913|	152.33	158.66	128.54	215.05	159.27	0.349252	0.0456769	0.98075	Mm.340943	NM_023913	ENSMUSG00000020715	9030414B18Rik|AI225830|C85377|Ire1a|Ire1alpha|Ire1p	-	11|11 E1	endoplasmic reticulum (ER) to nucleus signalling 1	protein-coding	no	no	162.77	yes
Gm6277	NR_045421	chr18	11821088	11839377	-	1415	1	Gm6277||Gm6277|NR_045421|	73.75	84.7	75.29	32.43	73.58	-0.575461	0.0456976	0.98075	Mm.353277	NR_045421		-	-	18 A1|18	predicted gene 6277	ncRNA	no	no	67.95	yes
Alox5	NM_009662	chr6	116410071	116461178	-	2800	1	Alox5||Alox5|NM_009662|	211.57	267.22	269.01	168.97	234.72	-0.32128	0.045673	0.98075	Mm.41072	NM_009662	ENSMUSG00000025701	5-LO|5-LOX|5LO|5LX|AI850497|F730011J02	-	6 E3|6 53.79 cM	arachidonate 5-lipoxygenase	protein-coding	no	no	230.298	yes
F13a1	NM_001166391	chr13	36867178	37050244	-	3825	1	F13a1||F13a1|NM_001166391|	39.9	82.31	98.24	82.78	140.64	0.58381	0.0459266	0.983081	Mm.235105	NM_028784	ENSMUSG00000039109	1200014I03Rik|AI462306|F13a	-	13|13 A3.3	coagulation factor XIII, A1 subunit	protein-coding	no	no	88.774	yes
Tent5a	NM_001160378	chr9	85320439	85327124	-	5474	1	Tent5a||Tent5a|NM_001160378|	877.73	780.2	1048.51	1083.78	1054.36	0.232251	0.0458722	0.983081	Mm.74610	NM_001160378	ENSMUSG00000032265	BAP014|D930050G01Rik|Fam46a	-	9|9 E3.1	terminal nucleotidyltransferase 5A	protein-coding	no	no	968.916	yes
Atp11a	NM_001293667	chr8	12757016	12868728	+	7488	1	Atp11a||Atp11a|NM_001293667|	330.06	273.19	269.01	374.63	331.58	0.27109	0.0459499	0.983081	Mm.257837	NM_015804	ENSMUSG00000031441	4930558F19Rik|AU040868|Atpc1h|Ih	-	8|8 A1.1	ATPase, class VI, type 11A	protein-coding	no	no	315.694	yes
Cd164	NM_016898	chr10	41519500	41531042	+	2819	1	Cd164||Cd164|NM_016898|	1720.4	1714.29	1480.03	1348.33	1464.18	-0.235251	0.0460037	0.983139	Mm.269815	NM_016898	ENSMUSG00000019818	A115|A24|AA589639|AW540279|MGC-24|MSSP	-	10 B2|10 22.46 cM	CD164 antigen	protein-coding	no	no	1545.45	yes
Wfs1	NM_011716	chr5	36966104	36988982	-	3549	1	Wfs1||Wfs1|NM_011716|	90.67	81.12	112.93	131.42	113.63	0.348061	0.0460466	0.983223	Mm.20916	NM_011716	ENSMUSG00000039474	AI481085|wolframin	-	5|5 B3	wolframin ER transmembrane glycoprotein	protein-coding	no	no	105.954	yes
H2-Eb1	NM_010382	chr17	34305867	34316674	+	1658	1	H2-Eb1||H2-Eb1|NM_010382|	241.8	299.43	269.93	137.39	268.25	-0.431427	0.0461479	0.984553	Mm.22564	NM_010382	ENSMUSG00000060586	Eb|H-2Eb|H2Eb|Ia-4|Ia4	-	17 B1|17 17.98 cM	histocompatibility 2, class II antigen E beta	protein-coding	no	no	243.36	yes
H2-Ab1	NM_207105	chr17	34263227	34269418	+	1182	1	H2-Ab1||H2-Ab1|NM_207105|	222.46	250.52	256.16	163.85	232.85	-0.310261	0.0463159	0.985111	Mm.254067	NM_207105	ENSMUSG00000073421	AI845868|Abeta|H-2Ab|H2-Ab|I-Abeta|IAb|Ia-2|Ia2|Rmcs1	-	17 B1|17 17.98 cM	histocompatibility 2, class II antigen A, beta 1	protein-coding	no	no	225.168	yes
Treml4	NM_001163796	chr17	48264295	48275358	+	1707	1	Treml4||Treml4|NM_001163796|	16.93	27.44	30.3	36.7	40.05	0.592496	0.046287	0.985111	Mm.131234	NM_172623	ENSMUSG00000051682	5031403H21Rik|BB137214|IDCP1|TLT-4|TLT4|Treml3	-	17|17 C	triggering receptor expressed on myeloid cells-like 4	protein-coding	no	no	30.284	yes
Rgs5	NM_009063	chr1	169655501	169695813	+	4087	1	Rgs5||Rgs5|NM_009063|	60.45	64.42	67.02	73.39	98.73	0.409013	0.0463302	0.985111	Mm.20954	NM_009063	ENSMUSG00000026678	1110070A02Rik	-	1 H2.3|1 76.84 cM	regulator of G-protein signaling 5	protein-coding	no	no	72.802	yes
Laptm4a	NM_008640	chr12	8921307	8938741	+	2116	1	Laptm4a||Laptm4a|NM_008640|	498.11	517.75	452.64	406.21	435.9	-0.228625	0.0464303	0.98641	Mm.30071	NM_008640	ENSMUSG00000020585	AA286466|LAPTM4|MTP|Mtrp|mKIAA0108	-	12|12 A1.1	lysosomal-associated protein transmembrane 4A	protein-coding	no	no	462.122	yes
Ptprb	NM_029928	chr10	116301374	116389538	+	11849	1	Ptprb||Ptprb|NM_029928|	10.88	19.09	21.12	34.99	22.35	0.726136	0.0465751	0.988654	Mm.37213	NM_029928	ENSMUSG00000020154	3230402H02Rik|C130094E24|Ptpz|Rptpb|VE-PTP|Veptp	-	10|10 D2	protein tyrosine phosphatase, receptor type, B	protein-coding	no	no	21.686	yes
Sspn	NM_010656	chr6	145934122	145965225	+	4428	1	Sspn||Sspn|NM_010656|	65.29	57.26	48.66	24.75	50.3	-0.620537	0.0466923	0.989304	Mm.49689	NM_010656	ENSMUSG00000030255	Krag	-	6 G3|6 77.7 cM	sarcospan	protein-coding	no	no	49.252	yes
Parvb	NM_133167	chr15	84232043	84315609	+	3680	1	Parvb||Parvb|NM_133167|	182.56	258.87	266.26	313.19	270.11	0.292843	0.0467625	0.989304	Mm.323892	NM_133167	ENSMUSG00000022438	AI595373|AW742462|D15Gsk1|affixin	-	15|15 E2	parvin, beta	protein-coding	no	no	258.198	yes
Cdkn2aipnl	NM_029976	chr11	51967631	51977336	+	1859	1	Cdkn2aipnl||Cdkn2aipnl|NM_029976|	181.35	174.17	203.83	143.37	166.72	-0.284398	0.0467599	0.989304	Mm.289456	NM_029976	ENSMUSG00000020392	A430101B06Rik|AA409260|D11Ertd497e|MNCb-1520	-	11 B1.3|11 31.78 cM	CDKN2A interacting protein N-terminal like	protein-coding	no	no	173.888	yes
Crebl2	NM_177687	chr6	134830199	134857883	+	2527	1	Crebl2||Crebl2|NM_177687|	82.21	72.77	83.55	104.11	99.66	0.34431	0.0468435	0.990187	Mm.267010	NM_177687	ENSMUSG00000032652	AI046348|B230205M03	-	6|6 G1	cAMP responsive element binding protein-like 2	protein-coding	no	no	88.46	yes
Poc5	NM_026173	chr13	96388294	96415587	+	3008	1	Poc5||Poc5|NM_026173|	54.4	59.65	76.21	88.75	81.03	0.397013	0.0469421	0.990613	Mm.86472	NM_026173	ENSMUSG00000021671	1200014M14Rik|AV144706	-	13|13 D1	POC5 centriolar protein	protein-coding	no	no	72.008	yes
	NM_001372392	chr6	113366633	113377838	-	2230	1	Tada3||Tada3|NM_001372392|	172.89	174.17	197.4	122.89	171.38	-0.322025	0.0471069	0.991602									no	no	167.746	yes
Rit1	NR_028056	chr3	88716854	88731048	+	2527	1	Rit1||Rit1|NR_028056|	113.65	113.33	145.07	188.6	132.26	0.35721	0.0472656	0.992382	Mm.4009	NM_009069	ENSMUSG00000028057	RIBB|ROC1|Rit	-	3|3 F1	Ras-like without CAAX 1	protein-coding	no	no	138.582	yes
Pnp2	NM_001123371	chr14	50956141	50964749	+	1212	1	Pnp2||Pnp2|NM_001123371|	8.46	15.51	22.95	25.6	27.94	0.721858	0.0473012	0.992382	Mm.482171	NM_001123371	ENSMUSG00000068417	-	-	14|14 C1	purine-nucleoside phosphorylase 2	protein-coding	no	no	20.092	yes
Phf21b	NM_001081166	chr15	84785376	84856129	-	3702	1	Phf21b||Phf21b|NM_001081166|	70.12	54.88	75.29	87.9	89.42	0.388904	0.0474015	0.99366	Mm.101022	NM_001081166	ENSMUSG00000016624	A730032D07Rik	-	15|15 E2	PHD finger protein 21B	protein-coding	no	no	75.522	yes
Spata5l1	NM_001033256	chr2	122630625	122632704	+	1318	1	Spata5l1||Spata5l1|NM_001033256|	108.81	72.77	113.85	132.27	124.81	0.365637	0.0474422	0.993687	Mm.271306	NM_001033256		AV141009|C130039A10Rik	-	2|2 E5	spermatogenesis associated 5-like 1	protein-coding	no	no	110.502	yes
Ctnna1	NM_009818	chr18	35118912	35254775	+	3641	1	Ctnna1||Ctnna1|NM_009818|	322.8	320.91	346.14	419.01	360.46	0.228654	0.0475739	0.994695	Mm.18962	NM_009818	ENSMUSG00000037815	2010010M04Rik|AA517462|AI988031|Catna1	-	18 B1|18 18.89 cM	catenin (cadherin associated protein), alpha 1	protein-coding	no	no	353.864	yes
Plaur	NM_011113	chr7	24462483	24475968	+	1495	1	Plaur||Plaur|NM_011113|	145.08	125.26	184.55	200.54	179.76	0.307066	0.0476759	0.994695	Mm.1359	NM_011113	ENSMUSG00000046223	Cd87|u-PAR|uPAR	-	7|7 A3	plasminogen activator, urokinase receptor	protein-coding	no	no	167.038	yes
Aldh6a1	NM_001313967	chr12	84430721	84448317	-	3444	1	Aldh6a1||Aldh6a1|NM_001313967|	162.01	212.35	171.69	156.17	139.71	-0.3058	0.0477204	0.994695	Mm.247510	NM_134042	ENSMUSG00000021238	1110038I05Rik|Mmsdh	-	12 D1|12 39.21 cM	aldehyde dehydrogenase family 6, subfamily A1	protein-coding	no	no	168.386	yes
Bahcc1	NM_198423	chr11	120232947	120292297	+	10672	1	Bahcc1||Bahcc1|NM_198423|	187.39	194.45	166.18	261.99	195.6	0.319025	0.0476847	0.994695	Mm.309498	NM_198423	ENSMUSG00000039741	B930044J06|BC060615	-	11|11 E2	BAH domain and coiled-coil containing 1	protein-coding	no	no	201.122	yes
Tmed3	NM_025360	chr9	89699203	89705043	-	1319	1	Tmed3||Tmed3|NM_025360|	246.64	266.03	265.34	207.37	234.72	-0.244425	0.0477268	0.994695	Mm.27606	NM_025360	ENSMUSG00000032353	1200002G13Rik|AW546672|P24b	-	9|9 E3.1	transmembrane p24 trafficking protein 3	protein-coding	no	no	244.02	yes
Gnao1	NM_001113384	chr8	93810838	93960694	+	5990	1	Gnao1||Gnao1|NM_001113384|	15.72	48.91	32.13	44.38	59.61	0.673654	0.0479031	0.99645	Mm.251445	NM_010308	ENSMUSG00000031748	AW050213|Galphao|Gnao|alphaO	-	8 C5|8 45.94 cM	guanine nucleotide binding protein, alpha O	protein-coding	no	no	40.15	yes
	NR_164332	chr17	25570829	25575034	+	1441	1	Cerox1||Cerox1|NR_164332|	21.76	34.6	34.89	21.33	16.77	-0.686775	0.0480062	0.996981									no	no	25.87	yes
Vamp8	NM_016794	chr6	72385221	72390667	-	781	1	Vamp8||Vamp8|NM_016794|	194.65	176.56	179.95	147.63	158.34	-0.274629	0.0482586	0.998192	Mm.1838	NM_016794	ENSMUSG00000050732	AU041171|Edb|endobrevin	-	6 C1|6 32.27 cM	vesicle-associated membrane protein 8	protein-coding	no	no	171.426	yes
Zzef1	NM_001045536	chr11	72796226	72927120	+	11041	1	Zzef1||Zzef1|NM_001045536|	525.91	505.82	457.23	653.68	535.56	0.250194	0.0482901	0.998192	Mm.272030	NM_001045536	ENSMUSG00000055670	8430405D05Rik|BC051585|C130099L13Rik|C85424|NSPA|mKIAA0399	-	11|11 B4	zinc finger, ZZ-type with EF hand domain 1	protein-coding	no	no	535.64	yes
Rpl5	NM_016980	chr5	107900528	107909005	+	2004	1	Rpl5||Rpl5|NM_016980|	59.24	78.74	82.63	144.22	69.86	0.532401	0.0481363	0.998192	Mm.277897	NM_016980	ENSMUSG00000058558	U21RNA	-	5 F|5 52.23 cM	ribosomal protein L5	protein-coding	no	no	86.938	yes
Siglecg	NM_172900	chr7	43408280	43418349	+	2461	1	Siglecg||Siglecg|NM_172900|	50.78	81.12	86.3	123.74	80.1	0.473036	0.0481986	0.998192	Mm.24444	NM_172900	ENSMUSG00000030468	9830164H23|A630096C01Rik|Siglec-G|Siglec10|mSiglec-G	-	7|7 B3	sialic acid binding Ig-like lectin G	protein-coding	no	no	84.408	yes
Fam120aos	NR_015601	chr13	48968112	48969905	+	1458	1	Fam120aos||Fam120aos|NR_015601|	45.94	54.88	46.82	34.99	34.46	-0.507568	0.0482231	0.998192	Mm.426304	NR_015601		C030044B11Rik	-	13|13 A5	family with sequence similarity 120A, opposite strand	ncRNA	no	no	43.418	yes
Hspa1b	NM_010478	chr17	34956429	34959238	-	2809	1	Hspa1b||Hspa1b|NM_010478|	860.81	905.46	839.18	632.35	841.07	-0.252108	0.0483504	0.998622	Mm.372314	NM_010478	ENSMUSG00000090877	HSP70B1|Hsp70|Hsp70-1|Hsp70.1|hsp68	-	17 B1|17 18.5 cM	heat shock protein 1B	protein-coding	no	no	815.774	yes
Kdm2b	NM_001003953	chr5	122870676	122989099	-	5124	1	Kdm2b||Kdm2b|NM_001003953|	430.4	380.56	356.24	477.04	450.8	0.243779	0.048429	0.999311	Mm.86406	NM_013910	ENSMUSG00000029475	Cxxc2|Fbl10|Fbxl10|Jhdm1b|PCCX2	-	5|5 F	lysine (K)-specific demethylase 2B	protein-coding	no	no	419.008	yes
Fcrls	NM_030707	chr3	87250965	87263524	-	1976	1	Fcrls||Fcrls|NM_030707|	1448.38	1461.38	1231.22	1148.64	1219.22	-0.236122	0.0484629	0.999311	Mm.45173	NM_030707	ENSMUSG00000015852	2810439C17Rik|9330158F12|FcRH2sc|Fcrh2|IFGP2|IgSR|MMAN-g|Msr2|moFcRH2sc	-	3|3 F1	Fc receptor-like S, scavenger receptor	protein-coding	no	no	1301.77	yes
Cep104	NM_177673	chr4	153975561	154007225	+	3234	1	Cep104||Cep104|NM_177673|	62.87	56.07	84.47	88.75	62.4	0.138609	0.571497	1	Mm.297905	NM_177673	ENSMUSG00000039523	A930027E11|AI115523|Kiaa0562|mKIAA0562	-	4|4 E2	centrosomal protein 104	protein-coding	no	no	70.912	yes
Sorbs1	NM_178362	chr19	40292040	40513736	-	6263	1	Sorbs1||Sorbs1|NM_178362|	32.64	25.05	32.13	48.64	25.15	0.29453	0.387045	1	Mm.210815	NM_009166	ENSMUSG00000025006	2310065E01Rik|9530001P15Rik|CAP|SH3P12|Sh3d5|mKIAA1296	-	19 C3|19 34.25 cM	sorbin and SH3 domain containing 1	protein-coding	no	no	32.722	yes
Gfod2	NM_001368388	chr8	105714044	105758607	-	4602	1	Gfod2||Gfod2|NM_001368388|	29.02	5.96	24.79	18.77	26.08	0.143868	0.80074	1	Mm.40954	NM_027469	ENSMUSG00000013150	5730466C23Rik	-	8|8 D3	glucose-fructose oxidoreductase domain containing 2	protein-coding	no	no	20.924	yes
AU022793	NR_045719	chr15	39962649	39967515	+	1863	1	AU022793||AU022793|NR_045719|	36.27	70.38	65.19	54.62	63.34	0.0229476	0.947561	1	Mm.394885	NR_045719		-	-	15 B3.1|15	expressed sequence AU022793	ncRNA	no	no	57.96	yes
Reep5	NM_007874	chr18	34344886	34373415	-	2888	1	Reep5||Reep5|NM_007874|	616.59	683.57	620.66	622.11	573.75	-0.109689	0.308372	1	Mm.280075	NM_007874	ENSMUSG00000005873	AI324241|AU022809|AW495741|DP1/TB2|Dp1|R74856|TB2/DP1	-	18|18 B1	receptor accessory protein 5	protein-coding	no	no	623.336	yes
Gpn3	NM_024216	chr5	122372508	122382769	+	1387	1	Gpn3||Gpn3|NM_024216|	45.94	39.37	40.4	38.4	42.85	-0.0536226	0.866974	1	Mm.266328	NM_024216	ENSMUSG00000029464	A930018B01Rik|Atpbd1c|D5Ertd708e	-	5 F|5 62.33 cM	GPN-loop GTPase 3	protein-coding	no	no	41.392	yes
Uhmk1	NM_010633	chr1	170193422	170215407	-	7857	1	Uhmk1||Uhmk1|NM_010633|	744.74	753.95	707.88	821.8	696.7	0.0344469	0.771628	1	Mm.209150	NM_010633	ENSMUSG00000026667	4732477C12Rik|4930500M09Rik|AA673513|AI449218|AU021979|C820018A03Rik|KIS|Kist|P-CIP2	-	1|1 H3	U2AF homology motif (UHM) kinase 1	protein-coding	no	no	745.014	yes
Chtf8	NM_001364186	chr8	106883863	106893593	-	3292	1	Chtf8||Chtf8|NM_001364186|	457	521.33	505.89	435.22	529.98	-0.0499461	0.681705	1	Mm.490308	NM_145412	ENSMUSG00000046691	5830457O10Rik|Ctf8|Derpc	-	8|8 D3	CTF8, chromosome transmission fidelity factor 8	protein-coding	no	no	489.884	yes
Scube1	NM_001271472	chr15	83602583	83725039	-	7887	1	Scube1||Scube1|NM_001271472|	49.57	47.72	46.82	34.99	54.95	-0.111756	0.704095	1	Mm.40393	NM_022723	ENSMUSG00000016763	7330410C13Rik|A630023E24Rik	-	15|15 E1	signal peptide, CUB domain, EGF-like 1	protein-coding	no	no	46.81	yes
Pim2	NM_138606	chrX	7878306	7883432	+	2030	1	Pim2||Pim2|NM_138606|	83.42	59.65	104.67	101.55	107.11	0.312036	0.122389	1	Mm.347478	NM_138606	ENSMUSG00000031155	DXCch3|Pim-2	-	X A1.1|X 3.55 cM	proviral integration site 2	protein-coding	no	no	91.28	yes
Zfp944	NM_001355280	chr17	22337983	22361400	-	2776	1	Zfp944||Zfp944|NM_001355280|	101.56	133.61	111.09	116.91	110.84	-0.0266487	0.888111	1	Mm.442162	NM_176962	ENSMUSG00000033972	6330416L07Rik	-	17|17 A3.3	zinc finger protein 944	protein-coding	no	no	114.802	yes
St3gal2	NM_009179	chr8	110919865	110972497	+	4457	1	St3gal2||St3gal2|NM_009179|	729.02	598.87	621.58	583.71	648.26	-0.0910791	0.456325	1	Mm.200388	NM_009179	ENSMUSG00000031749	AI429591|AW822065|ST3GalII|Siat5	-	8|8 E1	ST3 beta-galactoside alpha-2,3-sialyltransferase 2	protein-coding	no	no	636.288	yes
Eif5a2	NM_177586	chr3	28781277	28798846	+	5017	1	Eif5a2||Eif5a2|NM_177586|	81	84.7	57.84	89.6	59.61	0.00330314	1	1	Mm.193670	NM_177586	ENSMUSG00000050192	9630038B20|eIF5AII	-	3|3 A3	eukaryotic translation initiation factor 5A2	protein-coding	no	no	74.55	yes
Hexdc	NM_001146073	chr11	121207643	121222656	+	1942	1	Hexdc||Hexdc|NM_001146073|	73.75	84.7	98.24	53.76	85.69	-0.319051	0.168352	1	Mm.275130	NM_001001333	ENSMUSG00000039307	BC069960|Hexd	-	11|11 E2	hexosaminidase (glycosyl hydrolase family 20, catalytic domain) containing	protein-coding	no	no	79.228	yes
Adipor2	NM_001355692	chr6	119353150	119388734	-	4137	1	Adipor2||Adipor2|NM_001355692|	593.62	597.68	613.31	594.8	587.72	-0.0371404	0.71344	1	Mm.291826	NM_197985	ENSMUSG00000030168	1110001I14Rik|ADCR2|AI115388|AW554121|D6Ucla1e|Paqr2	-	6 F1|6 56.78 cM	adiponectin receptor 2	protein-coding	no	no	597.426	yes
Pomt1	NM_145145	chr2	32236640	32255006	+	2830	1	Pomt1||Pomt1|NM_145145|	137.83	152.7	161.59	140.81	163.93	-0.00183416	1	1	Mm.31192	NM_145145	ENSMUSG00000039254	AI505244	-	2|2 B	protein-O-mannosyltransferase 1	protein-coding	no	no	151.372	yes
Ggt5	NM_011820	chr10	75589381	75617200	+	4346	1	Ggt5||Ggt5|NM_011820|	343.35	397.26	429.69	454.85	411.69	0.13811	0.228412	1	Mm.257927	NM_011820	ENSMUSG00000006344	AI551243|GGL|GGT-REL|Ggtla1	-	10|10 C1	gamma-glutamyltransferase 5	protein-coding	no	no	407.368	yes
Prdx5	NM_001358444	chr19	6906697	6910106	-	1253	1	Prdx5||Prdx5|NM_001358444|	137.83	132.42	130.38	137.39	149.03	0.0908128	0.56261	1	Mm.279782	NM_012021	ENSMUSG00000024953	AOEB166|AOPP|PLP|Pmp20|Prdx6|PrxV	-	19 A|19 5.08 cM	peroxiredoxin 5	protein-coding	no	no	137.41	yes
Capn10	NM_011796	chr1	92934408	92947948	+	2854	1	Capn10||Capn10|NM_011796|	64.08	56.07	47.74	66.56	46.57	0.0181092	0.999931	1	Mm.294315	NM_011796	ENSMUSG00000026270	AW049679|Capn8|mKIAA1845	-	1|1 D	calpain 10	protein-coding	no	no	56.204	yes
Ppcs	NM_026494	chr4	119418527	119422420	-	1441	1	Ppcs||Ppcs|NM_026494|	24.18	32.21	32.13	43.52	35.39	0.404364	0.153604	1	Mm.27245	NM_026494	ENSMUSG00000028636	6330579B17Rik|AI413471|AI790434	-	4|4 D2.1	phosphopantothenoylcysteine synthetase	protein-coding	no	no	33.486	yes
Trappc13	NM_001093759	chr13	104142153	104178466	-	3521	1	Trappc13||Trappc13|NM_001093759|	176.51	165.82	167.1	144.22	149.03	-0.221634	0.111764	1	Mm.272541	NM_025879	ENSMUSG00000021711	2410002O22Rik|2610524F24Rik|AI451892|AU017229	-	13|13 D1	trafficking protein particle complex 13	protein-coding	no	no	160.536	yes
Ankfy1	NM_009671	chr11	72690002	72772146	+	7985	1	Ankfy1||Ankfy1|NM_009671|	1048.2	1009.25	1018.21	1075.25	1087.89	0.0642368	0.520795	1	Mm.10313	NM_009671	ENSMUSG00000020790	Ankhzn|ZFYVE14|mKIAA1255	-	11|11 B4	ankyrin repeat and FYVE domain containing 1	protein-coding	no	no	1047.76	yes
Ugcg	NM_011673	chr4	59189550	59222833	+	3702	1	Ugcg||Ugcg|NM_011673|	446.12	393.68	413.16	413.03	402.37	-0.0461635	0.678173	1	Mm.198803	NM_011673	ENSMUSG00000028381	AU043821|C80537|Epcs21|GlcT-1|Ugcgl	-	4 32.44 cM|4 B3	UDP-glucose ceramide glucosyltransferase	protein-coding	no	no	413.672	yes
Purg	NM_001098233	chr8	33386325	33417469	+	1794	1	Purg||Purg|NM_001098233|	36.27	32.21	36.73	39.26	33.53	0.0432163	0.922462	1	Mm.159402	NM_152821	ENSMUSG00000049184	4930486B15Rik	-	8|8 A3	purine-rich element binding protein G	protein-coding	no	no	35.6	yes
Sept2	NM_001159717	chr1	93478993	93509732	+	3193	1	Septin2||Septin2|NM_001159717|	553.72	528.48	501.3	490.69	519.73	-0.0750526	0.491293	1	Mm.428652	NM_010891	ENSMUSG00000026276	AW208991|Nedd-5|Nedd5|mKIAA0158	-	1|1 D	septin 2	protein-coding	no	no	518.784	yes
Wdr41	NM_172590	chr13	94976344	95023316	+	3044	1	Wdr41||Wdr41|NM_172590|	261.14	329.26	321.35	301.24	291.53	-0.0489605	0.703208	1	Mm.33856	NM_172590	ENSMUSG00000042015	B830029I03Rik|MSTP048	-	13|13 D1	WD repeat domain 41	protein-coding	no	no	300.904	yes
Ebf3	NM_001113414	chr7	137193671	137314445	-	4965	1	Ebf3||Ebf3|NM_001113414|	448.54	467.64	447.13	471.92	441.49	-0.00325169	0.969052	1	Mm.258708	NM_010096	ENSMUSG00000010476	3110018A08Rik|O/E-2|mKIAA4201	-	7|7 F3	early B cell factor 3	protein-coding	no	no	455.344	yes
Zc3h3	NM_172121	chr15	75754447	75841908	-	3315	1	Zc3h3||Zc3h3|NM_172121|	66.49	68	82.63	75.95	66.13	-0.0443119	0.877312	1	Mm.209800	NM_172121	ENSMUSG00000075600	BC049953|Kiaa0150|Smicl|Zc3hdc3	-	15|15 D3	zinc finger CCCH type containing 3	protein-coding	no	no	71.84	yes
Msl1	NM_028722	chr11	98795516	98807859	+	4576	1	Msl1||Msl1|NM_028722|	906.75	944.83	958.53	937.86	987.3	0.0263061	0.78834	1	Mm.258352	NM_028722	ENSMUSG00000052915	2810017F12Rik|4121402D02Rik|4930463F05Rik|AA682082|Msl-1	-	11|11 D	male specific lethal 1	protein-coding	no	no	947.054	yes
Slc37a4	NM_001357729	chr9	44397095	44402968	+	2419	1	Slc37a4||Slc37a4|NM_001357729|	120.9	128.84	136.8	116.91	124.81	-0.108187	0.476945	1	Mm.30087	NM_008063	ENSMUSG00000032114	100043178|G6PT|G6pt1|GSD-1b|mG6PT	-	9|9 A5.2	solute carrier family 37 (glucose-6-phosphate transporter), member 4	protein-coding	no	no	125.652	yes
Tango2	NM_001359108	chr16	18300825	18348098	-	1687	1	Tango2||Tango2|NM_001359108|	124.53	150.31	153.33	147.63	175.11	0.159358	0.283843	1	Mm.265990	NM_138583	ENSMUSG00000013539	D16H22S680E|T10	-	16 A3|16 11.34 cM	transport and golgi organization 2	protein-coding	no	no	150.182	yes
Manea	NM_172865	chr4	26324506	26346652	-	4619	1	Manea||Manea|NM_172865|	362.7	289.89	302.07	360.98	305.5	0.0565368	0.69954	1	Mm.245602	NM_172865	ENSMUSG00000040520	4932703L02Rik	-	4|4 A3	mannosidase, endo-alpha	protein-coding	no	no	324.228	yes
Psma7	NM_001289476	chr2	180036367	180042464	-	1578	1	Psma7||Psma7|NM_001289476|	87.05	89.47	112.01	106.67	100.59	0.0869334	0.609986	1	Mm.21728	NM_011969	ENSMUSG00000027566	C6-I	-	2|2 H4	proteasome (prosome, macropain) subunit, alpha type 7	protein-coding	no	no	99.158	yes
Edc4	NM_001301100	chr8	105880881	105893225	+	4723	1	Edc4||Edc4|NM_001301100|	339.73	341.19	368.17	355	354.87	0.00798127	0.94296	1	Mm.28979	NM_181594	ENSMUSG00000036270	BC022641	-	8|8 D3	enhancer of mRNA decapping 4	protein-coding	no	no	351.792	yes
Vti1b	NM_001364374	chr12	79156017	79172458	-	1213	1	Vti1b||Vti1b|NM_001364374|	77.38	89.47	84.47	74.24	82.9	-0.105269	0.588307	1	Mm.265929	NM_016800	ENSMUSG00000021124	AU015348|GES30|MVti1b|SNARE|Vti1-rp1	-	12|12 C3	vesicle transport through interaction with t-SNAREs 1B	protein-coding	no	no	81.692	yes
Rnf25	NM_001305230	chr1	74593748	74601397	-	1457	1	Rnf25||Rnf25|NM_001305230|	123.32	144.35	143.23	145.07	151.82	0.101755	0.468523	1	Mm.280920	NM_021313	ENSMUSG00000026171	0610009H16Rik|AO7	-	1|1 C3	ring finger protein 25	protein-coding	no	no	141.558	yes
Cdk16	NM_011049	chrX	20688426	20699879	+	3080	1	Cdk16||Cdk16|NM_011049|	253.89	289.89	267.18	276.49	269.18	0.00335102	1	1	Mm.102574	NM_011049	ENSMUSG00000031065	Crk5|Pctaire1|Pctk1	-	X A1.3|X 16.18 cM	cyclin-dependent kinase 16	protein-coding	no	no	271.326	yes
Osm	NM_001013365	chr11	4236785	4241026	+	1902	1	Osm||Osm|NM_001013365|	542.84	397.26	500.38	452.29	574.68	0.0813836	0.570718	1	Mm.131422	NM_001013365	ENSMUSG00000058755	OncoM	-	11 A1|11 2.94 cM	oncostatin M	protein-coding	no	no	493.49	yes
Ptpn12	NM_001356590	chr5	20986645	21035247	-	4611	1	Ptpn12||Ptpn12|NM_001356590|	123.32	110.95	149.66	134.83	126.67	0.0113733	0.925209	1	Mm.319117	NM_011203	ENSMUSG00000028771	P19-PTP|PTP-P19|PTP-PEST|PTPG1	-	5|5 A3	protein tyrosine phosphatase, non-receptor type 12	protein-coding	no	no	129.086	yes
Ddit3	NM_007837	chr10	127290793	127296288	+	864	1	Ddit3||Ddit3|NM_007837|	152.33	90.67	134.97	109.23	170.45	0.131909	0.561256	1	Mm.110220	NM_007837	ENSMUSG00000025408	CHOP-10|CHOP10|chop|gadd153	-	10|10 D3	DNA-damage inducible transcript 3	protein-coding	no	no	131.53	yes
Arl4c	NM_177305	chr1	88698226	88702191	-	3965	1	Arl4c||Arl4c|NM_177305|	1650.28	1413.66	1344.15	1414.89	1369.18	-0.0929194	0.448109	1	Mm.27968	NM_177305	ENSMUSG00000049866	A630084M22Rik|Arl7|LAK	-	1|1 D	ADP-ribosylation factor-like 4C	protein-coding	no	no	1438.43	yes
Trmt1l	NM_026876	chr1	151428542	151458183	+	2742	1	Trmt1l||Trmt1l|NM_026876|	233.34	242.17	271.77	214.2	277.56	-0.0364908	0.820188	1	Mm.289373	NM_026876	ENSMUSG00000053286	1190005F20Rik|AW226554|C1orf25|Trm1-like|Trm1l	-	1|1 G1	tRNA methyltransferase 1 like	protein-coding	no	no	247.808	yes
Stard9	NM_001370940	chr2	120629121	120715881	+	15011	1	Stard9||Stard9|NM_001370940|	2468.77	2049.51	1740.78	2438.09	1963.42	0.0598073	0.70406	1	Mm.2289	NM_010621	ENSMUSG00000033705	4831403C07Rik|E230025N21Rik|Kif16a|mKIAA1300	-	2|2 E5	START domain containing 9	protein-coding	no	no	2132.11	yes
9930104L06Rik	NM_001355603	chr4	124937048	124944661	+	2843	1	9930104L06Rik||9930104L06Rik|NM_001355603|	131.78	164.63	192.81	180.92	165.79	0.0702929	0.626347	1	Mm.266907	NM_177573	ENSMUSG00000044730	C1orf109	-	4|4 D2.2	RIKEN cDNA 9930104L06 gene	protein-coding	no	no	167.186	yes
Acads	NM_007383	chr5	115110299	115119346	-	1851	1	Acads||Acads|NM_007383|	251.47	266.03	261.67	250.04	254.28	-0.0540705	0.654534	1	Mm.18759	NM_007383	ENSMUSG00000029545	AI196007|Bcd-1|Bcd1|Hdlq8|SCAD	-	5 55.99 cM|5 F	acyl-Coenzyme A dehydrogenase, short chain	protein-coding	no	no	256.698	yes
Zfp128	NM_153802	chr7	12881178	12893422	+	3826	1	Zfp128||Zfp128|NM_153802|	65.29	56.07	71.61	69.12	74.51	0.138785	0.481014	1	Mm.293823	NM_153802	ENSMUSG00000060397	9630016P15Rik|Znf8|mZnf8	-	7|7 A1	zinc finger protein 128	protein-coding	no	no	67.32	yes
Ing3	NM_001311061	chr6	21949571	21976038	+	3744	1	Ing3||Ing3|NM_001311061|	107.6	97.82	119.36	87.9	95	-0.262091	0.129353	1	Mm.39999	NM_023626	ENSMUSG00000029670	1300013A07Rik|P47ING3	-	6|6 A3.1	inhibitor of growth family, member 3	protein-coding	no	no	101.536	yes
Dctd	NR_027759	chr8	48109958	48141667	+	2690	1	Dctd||Dctd|NR_027759|	38.69	36.98	45.91	40.96	42.85	0.0265056	0.965594	1	Mm.121549	NM_178788	ENSMUSG00000031562	6030466N05Rik	-	8|8 B1.1	dCMP deaminase	protein-coding	no	no	41.078	yes
Naprt	NM_172607	chr15	75890964	75894481	-	1865	1	Naprt||Naprt|NM_172607|	42.31	42.95	49.58	34.13	40.98	-0.280181	0.278031	1	Mm.288368	NM_172607	ENSMUSG00000022574	9130210N20Rik|Naprt1	-	15|15 D3	nicotinate phosphoribosyltransferase	protein-coding	no	no	41.99	yes
Hk2	NM_013820	chr6	82725027	82774454	-	5476	1	Hk2||Hk2|NM_013820|	1333.52	1142.86	1207.35	1318.46	1301.19	0.0794311	0.470993	1	Mm.255848	NM_013820	ENSMUSG00000000628	AI642394|HKII	-	6 C3|6 35.94 cM	hexokinase 2	protein-coding	no	no	1260.68	yes
Phb	NM_008831	chr11	95666957	95680773	+	1786	1	Phb||Phb|NM_008831|	48.36	64.42	67.94	61.44	68.92	0.0920976	0.693279	1	Mm.263862	NM_008831	ENSMUSG00000038845	Bap32	-	11 59.01 cM|11 D	prohibitin	protein-coding	no	no	62.216	yes
Eif1ad	NM_027236	chr19	5366813	5371511	+	2458	1	Eif1ad||Eif1ad|NM_027236|	95.51	87.09	124.87	103.26	99.66	-0.0371576	0.905124	1	Mm.299167	NM_027236	ENSMUSG00000024841	2010003J03Rik|AI131644	-	19|19 A	eukaryotic translation initiation factor 1A domain containing	protein-coding	no	no	102.078	yes
Il15ra	NM_133836	chr2	11705293	11733985	+	1704	1	Il15ra||Il15ra|NM_133836|	59.24	56.07	72.53	71.68	67.99	0.136359	0.498219	1	Mm.200196	NM_008358	ENSMUSG00000023206	AA690181|IL-15RA	-	2 A1|2 8.97 cM	interleukin 15 receptor, alpha chain	protein-coding	no	no	65.502	yes
Engase	NR_153103	chr11	118476832	118489206	+	4291	1	Engase||Engase|NR_153103|	505.36	498.66	600.46	518.85	600.76	0.0504773	0.645167	1	Mm.473963	NM_172573	ENSMUSG00000033857	C130099A03|D230014K01Rik	-	11|11 E2	endo-beta-N-acetylglucosaminidase	protein-coding	no	no	544.818	yes
Zbtb11os1	NR_027965	chr16	55973268	55974617	-	1349	1	Zbtb11os1||Zbtb11os1|NR_027965|	24.18	31.02	29.38	17.07	25.15	-0.437283	0.196995	1	Mm.472722	NM_133677	ENSMUSG00000102101	2310061J03Rik	-	16|16 C1.1	zinc finger and BTB domain containing 11, opposite strand 1	ncRNA	no	no	25.36	yes
Rad17	NM_001044371	chr13	100617164	100651061	-	2688	1	Rad17||Rad17|NM_001044371|	103.97	104.98	105.59	110.09	102.46	0.0105032	0.990272	1	Mm.248489	NM_011233	ENSMUSG00000021635	MmRad24	-	13|13 D1	RAD17 checkpoint clamp loader component	protein-coding	no	no	105.418	yes
Myh9	NM_022410	chr15	77760585	77842175	-	7354	1	Myh9||Myh9|NM_022410|	1605.55	1426.79	1354.25	1356.01	1453.94	-0.0725321	0.536827	1	Mm.29677	NM_022410	ENSMUSG00000022443	Fltn|Myhn-1|Myhn1|NMHCIIA|NMMHC-A|NMMHC-IIA|TU72.6	-	15 E1|15 36.81 cM	myosin, heavy polypeptide 9, non-muscle	protein-coding	no	no	1439.31	yes
Cd48	NM_007649	chr1	171681992	171705257	+	1198	1	Cd48||Cd48|NM_007649|	256.31	233.82	207.5	219.32	207.71	-0.130074	0.349426	1	Mm.1738	NM_007649	ENSMUSG00000015355	AI449234|AW610730|BCM1|BLAST|BLAST-1|BLAST1|Bcm-1|MEM-102|SLAMF2|Sgp-60	-	1 H3|1 79.54 cM	CD48 antigen	protein-coding	no	no	224.932	yes
Nfatc3	NM_001368796	chr8	106059590	106130537	+	6110	1	Nfatc3||Nfatc3|NM_001368796|	580.32	538.03	515.99	577.73	513.21	-0.00899684	0.933962	1	Mm.383185	NM_010901	ENSMUSG00000031902	C80703|D8Ertd281e|NFAT4|NFATx	-	8 D3|8 53.08 cM	nuclear factor of activated T cells, cytoplasmic, calcineurin dependent 3	protein-coding	no	no	545.056	yes
Loxl3	NM_013586	chr6	83034205	83052566	+	4043	1	Loxl3||Loxl3|NM_013586|	162.01	196.84	213.93	215.9	208.64	0.13635	0.305747	1	Mm.380433	NM_013586	ENSMUSG00000000693	Lor2|Loxl2	-	6 C3|6 35.94 cM	lysyl oxidase-like 3	protein-coding	no	no	199.464	yes
L3mbtl2	NR_110362	chr15	81663889	81688315	+	3777	1	L3mbtl2||L3mbtl2|NR_110362|	139.03	132.42	158.84	135.69	158.34	0.0157925	0.919654	1	Mm.280768	NM_145993	ENSMUSG00000022394	4732493N06Rik|M4mbt	-	15|15 E1	L3MBTL2 polycomb repressive complex 1 subunit	protein-coding	no	no	144.864	yes
Atf2	NM_001025093	chr2	73816509	73892639	-	4271	1	Atf2||Atf2|NM_001025093|	319.17	372.21	358.99	366.1	344.62	0.0100097	0.94076	1	Mm.209903	NM_009715	ENSMUSG00000027104	Atf-2|CRE-BP|Creb2|D130078H02Rik|D18875|Tg(Gzma-Klra1)7Wum|mXBP	-	2|2 C3	activating transcription factor 2	protein-coding	no	no	352.218	yes
Dtx2	NM_023742	chr5	135994800	136032881	+	2635	1	Dtx2||Dtx2|NM_023742|	136.62	124.07	143.23	151.05	156.48	0.176133	0.221219	1	Mm.275574	NM_023742	ENSMUSG00000004947	2610524D08Rik|AA408415|AU022494|Deltex2	-	5|5 G2	deltex 2, E3 ubiquitin ligase	protein-coding	no	no	142.29	yes
Mgrn1	NM_001357062	chr16	4886100	4938296	+	3321	1	Mgrn1||Mgrn1|NM_001357062|	547.68	602.45	573.83	561.52	558.85	-0.0485279	0.638421	1	Mm.291326	NM_029657	ENSMUSG00000022517	2610042J20Rik|mKIAA0544|md|nc	-	16 A1|16 2.48 cM	mahogunin, ring finger 1	protein-coding	no	no	568.866	yes
Litaf	NM_019980	chr16	10959273	10993121	-	2230	1	Litaf||Litaf|NM_019980|	668.57	670.45	701.46	687.82	700.42	0.0164303	0.87041	1	Mm.294753	NM_019980	ENSMUSG00000022500	3222402J11Rik|C85531|N4WBP3|TBX1	-	16|16 A1	LPS-induced TN factor	protein-coding	no	no	685.744	yes
Zfhx3	NM_007496	chr8	108714644	108961636	+	16420	1	Zfhx3||Zfhx3|NM_007496|	4496.26	5072.49	4457.54	5115.97	4634.72	0.0466934	0.674409	1	Mm.416972	NM_007496	ENSMUSG00000038872	A230102L03Rik|Atbf1|Sci|WBP9|mKIAA4228	-	8|8 D3	zinc finger homeobox 3	protein-coding	no	no	4755.4	yes
Pnn	NM_008891	chr12	59066919	59074017	+	3452	1	Pnn||Pnn|NM_008891|	287.74	368.63	402.14	308.92	347.42	-0.120037	0.385223	1	Mm.22347	NM_008891	ENSMUSG00000020994	AU045199|D12Ertd512e	-	12 C1|12 26.0 cM	pinin	protein-coding	no	no	342.97	yes
Rxra	NM_011305	chr2	27677201	27763319	+	5248	1	Rxra||Rxra|NM_011305|	626.26	585.75	647.29	654.54	644.54	0.0547246	0.588825	1	Mm.24624	NM_011305	ENSMUSG00000015846	9530071D11Rik|Nr2b1|RXRalpha1	-	2 A3|2 19.38 cM	retinoid X receptor alpha	protein-coding	no	no	631.676	yes
Eloa	NM_013736	chr4	136003370	136021649	-	4571	1	Eloa||Eloa|NM_013736|	597.24	547.57	537.11	657.95	571.89	0.122228	0.297211	1	Mm.27663	NM_013736	ENSMUSG00000028668	110kDa|AA408125|Tceb3|Tceb3a	-	4|4 D3	elongin A	protein-coding	no	no	582.352	yes
Lilr4b	NM_008147	chr10	51480612	51486329	+	1465	1	Lilr4b||Lilr4b|NM_008147|	38.69	23.86	22.04	33.28	43.78	0.448247	0.179841	1	Mm.439661	NM_008147	ENSMUSG00000112023	Gp49a|gp49	-	10|10 B3	leukocyte immunoglobulin-like receptor, subfamily B, member 4B	protein-coding	no	no	32.33	yes
Trnt1	NM_027296	chr6	106769138	106782474	+	2229	1	Trnt1||Trnt1|NM_027296|	110.02	118.1	117.52	124.59	104.32	-0.0178047	0.946203	1	Mm.196332	NM_027296	ENSMUSG00000013736	2410043H24Rik|2610044E04Rik|9830143O18Rik|AA408384|C76540|CGI-47|mt-Trat	-	6|6 E1	tRNA nucleotidyl transferase, CCA-adding, 1	protein-coding	no	no	114.91	yes
Guca1b	NM_146079	chr17	47385393	47392967	+	1661	1	Guca1b||Guca1b|NM_146079|	15.72	26.25	31.22	17.92	27.01	-0.154123	0.748479	1	Mm.59151	NM_146079	ENSMUSG00000023979	BC018258|GCAP2	-	17|17 C	guanylate cyclase activator 1B	protein-coding	no	no	23.624	yes
Selenos	NM_001348246	chr7	66079649	66089405	+	1209	1	Selenos||Selenos|NM_001348246|	162.01	171.79	170.77	168.97	155.55	-0.0615818	0.647366	1	Mm.482127	NM_024439	ENSMUSG00000075701	1500011E07Rik|C78786|H-4|H-47|H4|H47|Sels|Seps1|Vimp	-	7 C|7 35.49 cM	selenoprotein S	protein-coding	no	no	165.818	yes
Nacc2	NM_001037098	chr2	26055536	26092396	-	6882	1	Nacc2||Nacc2|NM_001037098|	476.34	496.27	504.06	490.69	483.4	-0.0274148	0.793506	1	Mm.131074	NM_026495	ENSMUSG00000026932	0610020I02Rik|AI448087|Btbd14a|C030048H19Rik	-	2|2 A3	nucleus accumbens associated 2, BEN and BTB (POZ) domain containing	protein-coding	no	no	490.152	yes
Gpd2	NM_001145820	chr2	57237678	57370719	+	5712	1	Gpd2||Gpd2|NM_001145820|	45.94	65.61	71.61	91.31	49.37	0.193741	0.491247	1	Mm.3711	NM_010274	ENSMUSG00000026827	AA408484|AI448216|AU021455|AW494132|GPDH|Gdm1|Gpd-m|Gpdh-m|TISP38	-	2 C1.1|2 31.66 cM	glycerol phosphate dehydrogenase 2, mitochondrial	protein-coding	no	no	64.768	yes
Lactb	NM_030717	chr9	66955393	66975484	-	2020	1	Lactb||Lactb|NM_030717|	234.55	236.21	240.55	196.28	225.4	-0.183146	0.154327	1	Mm.157882	NM_030717	ENSMUSG00000032370	LACT-1|Lact1|Mrpl56	-	9|9 C	lactamase, beta	protein-coding	no	no	226.598	yes
Ifngr1	NM_010511	chr10	19591949	19610227	+	2097	1	Ifngr1||Ifngr1|NM_010511|	978.08	953.18	874.06	812.41	845.73	-0.186836	0.0865861	1	Mm.549	NM_010511	ENSMUSG00000020009	CD119|IFN-gammaR|Ifgr|Ifngr|Nktar	-	10 A3|10 8.49 cM	interferon gamma receptor 1	protein-coding	no	no	892.692	yes
Zc3h12b	NM_001034907	chrX	95711678	95931088	+	6466	1	Zc3h12b||Zc3h12b|NM_001034907|	44.73	42.95	26.63	40.11	40.05	0.0802618	0.84815	1	Mm.302708	NM_001034907	ENSMUSG00000035045	A130028J20Rik|CXorf32|Gm373	-	X|X C3	zinc finger CCCH-type containing 12B	protein-coding	no	no	38.894	yes
Nans	NM_053179	chr4	46489329	46503438	+	1893	1	Nans||Nans|NM_053179|	87.05	76.35	103.75	98.99	100.59	0.142186	0.408998	1	Mm.249349	NM_053179	ENSMUSG00000028334	4632418E04Rik|BB056474|Sas	-	4|4 B1	N-acetylneuraminic acid synthase (sialic acid synthase)	protein-coding	no	no	93.346	yes
Vmac	NM_178926	chr17	56713932	56716921	-	2171	1	Vmac||Vmac|NM_178926|	55.61	77.54	61.52	49.5	56.82	-0.296931	0.197031	1	Mm.37290	NM_178926	ENSMUSG00000054723	AI662250	-	17|17 D	vimentin-type intermediate filament associated coiled-coil protein	protein-coding	no	no	60.198	yes
Zbtb7b	NM_009565	chr3	89377644	89393378	-	3862	1	Zbtb7b||Zbtb7b|NM_009565|	523.5	586.94	557.31	623.82	601.69	0.128912	0.213899	1	Mm.262184	NM_009565	ENSMUSG00000028042	Thpok|Zfp67|c-Krox	-	3 F1|3 39.09 cM	zinc finger and BTB domain containing 7B	protein-coding	no	no	578.652	yes
Mrps30	NM_021556	chr13	118380110	118387252	-	1581	1	Mrps30||Mrps30|NM_021556|	83.42	88.28	104.67	109.23	84.76	0.0597595	0.771771	1	Mm.143810	NM_021556	ENSMUSG00000021731	2610020A16Rik|AA968347|PAP|Pdcd9	-	13|13 D2.3	mitochondrial ribosomal protein S30	protein-coding	no	no	94.072	yes
Mpg	NM_010822	chr11	32226505	32232702	+	1738	1	Mpg||Mpg|NM_010822|	47.15	54.88	62.43	28.16	67.99	-0.213753	0.546227	1	Mm.263161	NM_010822	ENSMUSG00000020287	9830006D05|AI326268|APNG|Aag|Mid1	-	11 A4|11 18.83 cM	N-methylpurine-DNA glycosylase	protein-coding	no	no	52.122	yes
	NM_001374737	chr5	30888934	30906661	+	3688	1	Agbl5||Agbl5|NM_001374737|	139.03	158.66	148.74	89.6	142.51	-0.375893	0.0498738	1									no	no	135.708	yes
Ppp2r5e	NM_012024	chr12	75449463	75596232	-	6233	1	Ppp2r5e||Ppp2r5e|NM_012024|	319.17	348.35	324.1	333.67	375.36	0.088907	0.452555	1	Mm.259626	NM_012024	ENSMUSG00000021051	4633401M22Rik|B56beta	-	12|12 C3	protein phosphatase 2, regulatory subunit B', epsilon	protein-coding	no	no	340.13	yes
Dgcr6	NR_110380	chr16	18066403	18071632	+	1348	1	Dgcr6||Dgcr6|NR_110380|	22.97	25.05	35.81	35.84	33.53	0.279467	0.329569	1	Mm.27155	NM_010047	ENSMUSG00000003531	-	-	16 A3|16 11.19 cM	DiGeorge syndrome critical region gene 6	protein-coding	no	no	30.64	yes
Adam15	NM_001037722	chr3	89339640	89350028	-	2962	1	Adam15||Adam15|NM_001037722|	825.74	899.5	825.4	788.52	798.22	-0.112104	0.276614	1	Mm.274049	NM_009614	ENSMUSG00000028041	AD56|MDC15	-	3 F1|3 39.07 cM	a disintegrin and metallopeptidase domain 15 (metargidin)	protein-coding	no	no	827.476	yes
Uqcrc2	NM_025899	chr7	120635189	120659523	+	1855	1	Uqcrc2||Uqcrc2|NM_025899|	140.24	162.24	163.43	150.19	140.64	-0.107372	0.470794	1	Mm.334206	NM_025899	ENSMUSG00000030884	1500004O06Rik	-	7|7 F2	ubiquinol cytochrome c reductase core protein 2	protein-coding	no	no	151.348	yes
Tmem106a	NM_001359325	chr11	101582299	101591786	+	2529	1	Tmem106a||Tmem106a|NM_001359325|	183.77	194.45	174.45	147.63	169.52	-0.226419	0.108976	1	Mm.280559	NM_144830	ENSMUSG00000034947	0610008L10Rik|AI043106|BC022145	-	11|11 D	transmembrane protein 106A	protein-coding	no	no	173.964	yes
Pdcd6	NM_011051	chr13	74303121	74317326	-	1513	1	Pdcd6||Pdcd6|NM_011051|	83.42	89.47	97.32	81.92	81.03	-0.160413	0.389915	1	Mm.24254	NM_011051	ENSMUSG00000021576	AV299538|Alg2|MA-3|PS2|alg-2	-	13|13 C1	programmed cell death 6	protein-coding	no	no	86.632	yes
Gtpbp2	NM_001357745	chr17	46162064	46169370	+	3293	1	Gtpbp2||Gtpbp2|NM_001357745|	606.92	671.64	717.06	722.81	679.93	0.0637659	0.533424	1	Mm.22147	NM_019581	ENSMUSG00000023952	nmf205	-	17|17 C	GTP binding protein 2	protein-coding	no	no	679.672	yes
Sbf1	NM_001081030	chr15	89288236	89315311	-	6111	1	Sbf1||Sbf1|NM_001081030|	552.51	572.62	554.55	624.67	631.5	0.153971	0.128152	1	Mm.35483	NM_030019	ENSMUSG00000036529	2610510A08Rik|B230113C15Rik|Mtmr5|mKIAA3020	-	15|15 E3	SET binding factor 1	protein-coding	no	no	587.17	yes
Rfng	NM_009053	chr11	120780745	120784204	-	2103	1	Rfng||Rfng|NM_009053|	154.75	165.82	205.66	167.26	176.04	-0.0516855	0.778468	1	Mm.871	NM_009053	ENSMUSG00000025158	-	-	11 E2|11 84.53 cM	RFNG O-fucosylpeptide 3-beta-N-acetylglucosaminyltransferase	protein-coding	no	no	173.906	yes
Gstz1	NM_001252555	chr12	87147165	87164723	+	1951	1	Gstz1||Gstz1|NM_001252555|	54.4	72.77	85.39	55.47	76.38	-0.129501	0.624354	1	Mm.29652	NM_010363	ENSMUSG00000021033	GSTZ1-1|MAAI	-	12|12 D2	glutathione transferase zeta 1 (maleylacetoacetate isomerase)	protein-coding	no	no	68.882	yes
Crls1	NM_001024385	chr2	132846666	132866768	+	1894	1	Crls1||Crls1|NM_001024385|	87.05	69.19	92.73	77.66	78.24	-0.108558	0.612451	1	Mm.357342	NM_025646	ENSMUSG00000027357	0610009I22Rik|4930557M15Rik|5730490M08Rik	-	2|2 F2	cardiolipin synthase 1	protein-coding	no	no	80.974	yes
Mbnl2	NM_001360377	chr14	120275669	120431698	+	4570	1	Mbnl2||Mbnl2|NM_001360377|	683.08	626.31	564.65	670.75	612.87	0.0271629	0.839325	1	Mm.238266	NM_175341	ENSMUSG00000022139	1110002M11Rik|AI047808|AI837313|AI849185|AL118326|MBLL|R75232|mKIAA4072	-	14|14 E4	muscleblind like splicing factor 2	protein-coding	no	no	631.532	yes
Mpv17l2	NM_183170	chr8	70758649	70760921	-	946	1	Mpv17l2||Mpv17l2|NM_183170|	72.54	59.65	75.29	61.44	78.24	-0.00627458	1	1	Mm.213010	NM_183170	ENSMUSG00000035559	Fksg24	-	8|8 B3.3	MPV17 mitochondrial membrane protein-like 2	protein-coding	no	no	69.432	yes
Alkbh2	NM_175016	chr5	114123926	114128218	-	1108	1	Alkbh2||Alkbh2|NM_175016|	20.55	27.44	32.13	27.31	31.67	0.112592	0.736735	1	Mm.332593	NM_175016	ENSMUSG00000044339	9530023G02|AU016977|Abh2|mABH2	-	5|5 F	alkB homolog 2, alpha-ketoglutarate-dependent dioxygenase	protein-coding	no	no	27.82	yes
Ivns1abp	NM_001359263	chr1	151344486	151364444	+	4330	1	Ivns1abp||Ivns1abp|NM_001359263|	2617.48	2537.44	2157.62	2078.82	2186.96	-0.208467	0.0894544	1	Mm.33764	NM_028582	ENSMUSG00000023150	1190004M08Rik|1700126I16Rik|AA960440|HSPC068|ND1|NS-1|NS1-BP|Nd1-L|Nd1-S|mKIAA0850	-	1|1 G1	influenza virus NS1A binding protein	protein-coding	no	no	2315.66	yes
Kmt5c	NM_001358044	chr7	4740127	4747514	+	2797	1	Kmt5c||Kmt5c|NM_001358044|	385.67	442.59	541.7	340.5	422.86	-0.274035	0.0519408	1	Mm.247844	NM_146177	ENSMUSG00000059851	BC024816|Suv4-20h2|Suv420h2	-	7|7 A1	lysine methyltransferase 5C	protein-coding	no	no	426.664	yes
Zfp658	NM_001008549	chr7	43562370	43575461	+	3372	1	Zfp658||Zfp658|NM_001008549|	599.66	564.27	576.59	681.85	563.51	0.0908965	0.439266	1	Mm.333821	NM_001008549	ENSMUSG00000056592	-	-	7|7 B3	zinc finger protein 658	protein-coding	no	no	597.176	yes
Capza1	NM_001355044	chr3	104822781	104864505	-	2967	1	Capza1||Capza1|NM_001355044|	113.65	149.12	130.38	119.47	127.6	-0.09639	0.563091	1	Mm.19142	NM_009797	ENSMUSG00000070372	CAPZ|CAZ1|Cappa1|capZ alpha-1	-	3 F2.2|3 45.88 cM	capping protein (actin filament) muscle Z-line, alpha 1	protein-coding	no	no	128.044	yes
Cmpk1	NM_025647	chr4	114960613	114987228	-	1869	1	Cmpk1||Cmpk1|NM_025647|	151.12	199.23	186.38	152.75	154.61	-0.23215	0.119851	1	Mm.294159	NM_025647	ENSMUSG00000028719	0610011D08Rik|CK|Cmpk|UMP-CMPk	-	4|4 D1	cytidine monophosphate (UMP-CMP) kinase 1	protein-coding	no	no	168.818	yes
Vps33b	NM_178070	chr7	80269655	80291579	+	2523	1	Vps33b||Vps33b|NM_178070|	67.7	102.6	118.44	94.72	79.17	-0.163637	0.475295	1	Mm.322870	NM_178070	ENSMUSG00000030534	-	-	7|7 D2	vacuolar protein sorting 33B	protein-coding	no	no	92.526	yes
Cfp	NM_008823	chrX	20925454	20931555	-	1619	1	Cfp||Cfp|NM_008823|	10.88	19.09	25.71	29.01	27.94	0.574435	0.0886868	1	Mm.3064	NM_008823	ENSMUSG00000001128	BCFG|Pfc	-	X A1.3|X 16.44 cM	complement factor properdin	protein-coding	no	no	22.526	yes
Lrrc47	NM_201226	chr4	154011803	154021512	+	3382	1	Lrrc47||Lrrc47|NM_201226|	286.53	283.93	339.71	296.12	343.69	0.0589672	0.60955	1	Mm.260690	NM_201226	ENSMUSG00000029028	2900010D03Rik|AA960559|mKIAA1185	-	4|4 E2	leucine rich repeat containing 47	protein-coding	no	no	309.996	yes
Cd53	NM_007651	chr3	106758861	106790149	-	2787	1	Cd53||Cd53|NM_007651|	907.96	942.44	769.4	732.19	770.28	-0.230728	0.0587929	1	Mm.316861	NM_007651	ENSMUSG00000040747	AI323659|Ox-44|Tspan25	-	3 F2.3|3 46.53 cM	CD53 antigen	protein-coding	no	no	824.454	yes
Elac2	NM_001362982	chr11	64979035	65002074	+	3365	1	Elac2||Elac2|NM_001362982|	89.47	97.82	110.18	131.42	108.98	0.262732	0.113031	1	Mm.157711	NM_023479	ENSMUSG00000020549	1110017O07Rik|D11Wsu80e|Hpc2	-	11 B3|11 40.42 cM	elaC ribonuclease Z 2	protein-coding	no	no	107.574	yes
Mboat7	NM_029934	chr7	3677789	3692986	-	2326	1	Mboat7||Mboat7|NM_029934|	552.51	530.87	555.47	510.32	506.69	-0.11567	0.25442	1	Mm.397541	NM_029934	ENSMUSG00000035596	5730589L02Rik|BB1|LPLAT 7|Leng4|Lpiat|Lpiat1|m-mboa-7	-	7|7 A1	membrane bound O-acyltransferase domain containing 7	protein-coding	no	no	531.172	yes
Brf2	NM_025686	chr8	27123832	27128632	-	1376	1	Brf2||Brf2|NM_025686|	49.57	47.72	54.17	63.15	42.85	0.0614979	0.835262	1	Mm.334467	NM_025686	ENSMUSG00000031487	2700059M06Rik|5730512K07Rik|AU018504|AU022602|BRFU|TFIIIB50	-	8|8 A2	BRF2, RNA polymerase III transcription initiation factor 50kDa subunit	protein-coding	no	no	51.492	yes
Sarm1	NM_001168521	chr11	78472330	78497754	-	5147	1	Sarm1||Sarm1|NM_001168521|	38.69	36.98	41.32	42.67	34.46	-0.0259579	0.977377	1	Mm.210332	NM_172795	ENSMUSG00000050132	A830091I15Rik|C78606|MyD885|Sarm	-	11 B5|11 46.74 cM	sterile alpha and HEAT/Armadillo motif containing 1	protein-coding	no	no	38.824	yes
Vamp4	NM_001356527	chr1	162570515	162599080	+	5236	1	Vamp4||Vamp4|NM_001356527|	205.53	258.87	262.59	225.29	205.84	-0.181857	0.185975	1	Mm.10699	NM_016796	ENSMUSG00000026696	D1Ertd147e|Vamp-4	-	1 H2.1|1 70.29 cM	vesicle-associated membrane protein 4	protein-coding	no	no	231.624	yes
Enpp5	NM_001329619	chr17	44078802	44086561	+	4858	1	Enpp5||Enpp5|NM_001329619|	70.12	63.23	68.86	52.06	55.88	-0.333006	0.127388	1	Mm.30145	NM_032003	ENSMUSG00000023960	AW061004|D17Abb1e|E-NPP 5	-	17 B3|17 20.3 cM	ectonucleotide pyrophosphatase/phosphodiesterase 5	protein-coding	no	no	62.03	yes
Rnps1	NM_001357626	chr17	24414646	24425897	+	2277	1	Rnps1||Rnps1|NM_001357626|	83.42	85.89	105.59	95.58	102.46	0.0891899	0.607556	1	Mm.1951	NM_009070	ENSMUSG00000034681	-	-	17|17 A3.3	ribonucleic acid binding protein S1	protein-coding	no	no	94.588	yes
Rnf14	NM_001361268	chr18	38296805	38317849	+	3453	1	Rnf14||Rnf14|NM_001361268|	234.55	270.8	274.52	238.09	233.79	-0.153126	0.215444	1	Mm.228903	NM_020012	ENSMUSG00000060450	2310075C09Rik|2610005D23Rik|AA986456|AU041447|D18Ertd188e|D7Bwg0165e|Triad2	-	18 B3|18 20.2 cM	ring finger protein 14	protein-coding	no	no	250.35	yes
Hlx	NM_008250	chr1	184727145	184732493	-	2140	1	Hlx||Hlx|NM_008250|	400.18	392.49	493.96	468.5	528.11	0.200155	0.0832012	1	Mm.1347	NM_008250	ENSMUSG00000039377	Hlx1	-	1 H5|1 88.97 cM	H2.0-like homeobox	protein-coding	no	no	456.648	yes
Bbs2	NM_026116	chr8	94067952	94098509	-	2614	1	Bbs2||Bbs2|NM_026116|	49.57	58.46	65.19	28.16	52.16	-0.548943	0.0533252	1	Mm.292107	NM_026116	ENSMUSG00000031755	2410125H22Rik|AI447581	-	8|8 C5	Bardet-Biedl syndrome 2 (human)	protein-coding	no	no	50.708	yes
Tmem106b	NM_027992	chr6	13069759	13089269	+	6065	1	Tmem106b||Tmem106b|NM_027992|	656.48	643.01	574.75	609.31	540.22	-0.131402	0.261609	1	Mm.27742	NM_027992	ENSMUSG00000029571	2310036D22Rik|5830455K21Rik|6430519M21Rik|AI428776|AI661344	-	6|6 A1	transmembrane protein 106B	protein-coding	no	no	604.754	yes
Slc12a4	NM_001253804	chr8	105943590	105966115	-	3785	1	Slc12a4||Slc12a4|NM_001253804|	186.19	167.02	175.36	189.45	188.15	0.0895895	0.520912	1	Mm.292447	NM_009195	ENSMUSG00000017765	AW546649|KCC1|RBCKCC1	-	8 D3|8 53.06 cM	solute carrier family 12, member 4	protein-coding	no	no	181.234	yes
Inpp4a	NM_001290797	chr1	37299838	37410740	+	5811	1	Inpp4a||Inpp4a|NM_001290797|	350.61	386.52	399.39	407.91	326	-0.0566221	0.660778	1	Mm.5294	NM_030266	ENSMUSG00000026113	107kDa|9630012D15|D130048C09Rik|R74740	-	1 B|1 15.46 cM	inositol polyphosphate-4-phosphatase, type I	protein-coding	no	no	374.086	yes
Pomt2	NM_153415	chr12	87106861	87147902	-	5023	1	Pomt2||Pomt2|NM_153415|	182.56	149.12	177.2	210.78	174.17	0.171516	0.253869	1	Mm.388249	NM_153415	ENSMUSG00000034126	-	-	12|12 D2	protein-O-mannosyltransferase 2	protein-coding	no	no	178.766	yes
Gosr1	NM_001356321	chr11	76726602	76763578	-	4265	1	Gosr1||Gosr1|NM_001356321|	308.29	360.28	344.3	370.36	328.79	0.0396178	0.748817	1	Mm.20931	NM_016810	ENSMUSG00000010392	AI414660|AI426320|BB145494|GOS-28|GOSRI|GS28	-	11|11 B5	golgi SNAP receptor complex member 1	protein-coding	no	no	342.404	yes
Tmed5	NM_028876	chr5	108121556	108132620	-	3864	1	Tmed5||Tmed5|NM_028876|	761.67	762.3	704.21	674.16	703.22	-0.12142	0.252626	1	Mm.363960	NM_028876	ENSMUSG00000063406	3110020O18Rik|4432412D15Rik|p24gamma2	-	5|5 F	transmembrane p24 trafficking protein 5	protein-coding	no	no	721.112	yes
Rbms1	NM_001141931	chr2	60751953	60881438	-	2468	1	Rbms1||Rbms1|NM_001141931|	77.38	99.02	123.95	115.21	95.94	0.0571714	0.770173	1	Mm.259667	NM_020296	ENSMUSG00000026970	2600014B10Rik|AI255215|MSSP-1|MSSP-2|MSSP-3|YC1	-	2|2 C1.2	RNA binding motif, single stranded interacting protein 1	protein-coding	no	no	102.3	yes
Aamp	NM_001190444	chr1	74279840	74284738	-	1799	1	Aamp||Aamp|NM_001190444|	305.88	287.5	333.28	285.03	322.27	-0.0408246	0.758031	1	Mm.379371	NM_146110	ENSMUSG00000006299	AU040907|Aamp-rs	-	1 C3|1 38.53 cM	angio-associated migratory protein	protein-coding	no	no	306.792	yes
Lrch1	NM_001033439	chr14	74754673	74947877	-	4668	1	Lrch1||Lrch1|NM_001033439|	557.35	557.11	592.2	578.59	599.83	0.0373493	0.708253	1	Mm.288868	NM_001033439	ENSMUSG00000068015	4832412D13Rik|AI552548|AW215503|Chdc1|mKIAA1016	-	14|14 D3	leucine-rich repeats and calponin homology (CH) domain containing 1	protein-coding	no	no	577.016	yes
Zfp687	NM_001357863	chr3	95006590	95015457	-	4737	1	Zfp687||Zfp687|NM_001357863|	310.71	307.79	266.26	306.36	317.61	0.0723436	0.600992	1	Mm.389478	NM_030074	ENSMUSG00000019338	4931408L03Rik|Znf687|mKIAA1441	-	3|3 F2.1	zinc finger protein 687	protein-coding	no	no	301.746	yes
Sec16b	NM_033354	chr1	157506796	157568424	+	4540	1	Sec16b||Sec16b|NM_033354|	83.42	95.44	116.6	95.58	95.94	-0.0628134	0.766258	1	Mm.87114	NM_033354	ENSMUSG00000026589	Lztr2|Rgpr|Rgpr-p117	-	1|1 H1	SEC16 homolog B (S. cerevisiae)	protein-coding	no	no	97.396	yes
Rbm34	NM_172762	chr8	126947173	126971049	-	3380	1	Rbm34||Rbm34|NM_172762|	67.7	83.51	75.29	102.4	72.65	0.207617	0.337573	1	Mm.28199	NM_172762	ENSMUSG00000033931	4930547K05Rik|6330444B11|D8Ertd233e	-	8 E2|8 74.64 cM	RNA binding motif protein 34	protein-coding	no	no	80.31	yes
Mex3d	NM_198615	chr10	80380355	80387651	-	3255	1	Mex3d||Mex3d|NM_198615|	222.46	150.31	205.66	195.42	265.45	0.24012	0.169183	1	Mm.268389	NM_198615	ENSMUSG00000048696	BC059858|Rkhd1	-	10|10 C1	mex3 RNA binding family member D	protein-coding	no	no	207.86	yes
Glg1	NM_001368315	chr8	111153284	111259210	-	8170	1	Glg1||Glg1|NM_001368315|	1161.85	1208.47	1265.19	1134.99	1186.62	-0.0750474	0.442592	1	Mm.276271	NM_009149	ENSMUSG00000003316	AI593353|AW537898|CFR|CFR-1|ESL-1|MG-160|MG160|Selel	-	8 E1|8 57.98 cM	golgi apparatus protein 1	protein-coding	no	no	1191.42	yes
Cers6	NM_001347161	chr2	68861441	69114283	+	7042	1	Cers6||Cers6|NM_001347161|	282.91	258.87	269.93	268.81	251.48	-0.0667053	0.579293	1	Mm.222222	NM_172856	ENSMUSG00000027035	4732462C07Rik|AW544719|Lass6|T1L	-	2|2 C2	ceramide synthase 6	protein-coding	no	no	266.4	yes
Vac14	NR_151674	chr8	110618567	110720398	+	3123	1	Vac14||Vac14|NR_151674|	215.2	195.65	225.86	232.12	224.47	0.0913496	0.468307	1	Mm.274894	NM_146216	ENSMUSG00000010936	AA959718|BC032215|D8Wsu151e|Tax1bp2|Trx|ingls	-	8 D3-E1|8 57.59 cM	Vac14 homolog (S. cerevisiae)	protein-coding	no	no	218.66	yes
Prkce	NM_011104	chr17	86167785	86657919	+	6225	1	Prkce||Prkce|NM_011104|	276.86	288.7	321.35	256.87	280.36	-0.154509	0.204056	1	Mm.24614	NM_011104	ENSMUSG00000045038	5830406C15Rik|PKC[e]|PKCepsilon|Pkce|R75156	-	17|17 E4	protein kinase C, epsilon	protein-coding	no	no	284.828	yes
Gm3002	NR_033388	chr14	3814913	3830681	+	5206	1	Gm3002||Gm3002|NR_033388|	20.55	41.75	36.73	49.5	32.6	0.302703	0.348263	1	Mm.483675	NR_033388		-	-	14 A1|14	alpha-takusan pseudogene	pseudo	no	no	36.226	yes
Chtop	NM_023215	chr3	90498539	90509498	-	3712	1	Chtop||Chtop|NM_023215|	652.86	619.15	658.3	634.06	676.21	0.0126761	0.904916	1	Mm.154136	NM_023215	ENSMUSG00000001017	2500003M10Rik|Fop|Srag	-	3|3 F1	chromatin target of PRMT1	protein-coding	no	no	648.116	yes
Zfp984	NM_001127189	chr4	147753974	147809788	-	2718	1	Zfp984||Zfp984|NM_001127189|	108.81	150.31	114.77	100.7	107.11	-0.270023	0.135573	1	Mm.327194	NM_001127189	ENSMUSG00000078495	Gm13157	-	4|4 E1	zinc finger protein 984	protein-coding	no	no	116.34	yes
Sh2b3	NM_001306127	chr5	121815481	121836859	-	4345	1	Sh2b3||Sh2b3|NM_001306127|	1555.98	1480.47	1480.03	1499.38	1523.8	-0.00768695	0.941959	1	Mm.65493	NM_008507	ENSMUSG00000042594	AI429800|Lnk	-	5 F|5 61.99 cM	SH2B adaptor protein 3	protein-coding	no	no	1507.93	yes
Armt1	NM_024261	chr10	4432605	4455140	+	2281	1	Armt1||Armt1|NM_024261|	106.39	118.1	102.83	101.55	111.77	-0.0406923	0.835517	1	Mm.346733	NM_024261	ENSMUSG00000061759	1700052N19Rik|AW320013|AW536799	-	10|10 A1	acidic residue methyltransferase 1	protein-coding	no	no	108.128	yes
S100a10	NM_009112	chr3	93555117	93564645	+	645	1	S100a10||S100a10|NM_009112|	18.13	17.89	17.44	29.87	18.63	0.442717	0.23908	1	Mm.1	NM_009112	ENSMUSG00000041959	42C|AA409961|AL024248|CAL12|CLP11|Cal1l|p10|p11	-	3 F2.1|3 40.51 cM	S100 calcium binding protein A10 (calpactin)	protein-coding	no	no	20.392	yes
Adap2	NM_172133	chr11	80154162	80178827	+	1576	1	Adap2||Adap2|NM_172133|	652.86	665.67	619.74	566.64	631.5	-0.121813	0.260968	1	Mm.341520	NM_172133	ENSMUSG00000020709	Centa2	-	11 B5|11 47.56 cM	ArfGAP with dual PH domains 2	protein-coding	no	no	627.282	yes
Zfp664	NM_001081750	chr5	124862705	124888630	+	4071	1	Zfp664||Zfp664|NM_001081750|	238.17	198.03	237.8	235.53	221.68	0.0120002	0.947208	1	Mm.138617	NM_001081750	ENSMUSG00000079215	AW060232|D930038J03Rik|ZFOC1|Znf664	-	5|5 F	zinc finger protein 664	protein-coding	no	no	226.242	yes
Tspo	NM_009775	chr15	83563573	83574203	+	849	1	Tspo||Tspo|NM_009775|	81	95.44	90.9	105.82	85.69	0.0957032	0.632883	1	Mm.1508	NM_009775	ENSMUSG00000041736	Bzrp|IBP|PBR|Tspo1	-	15 E1|15 39.4 cM	translocator protein	protein-coding	no	no	91.77	yes
Dctn4	NM_001357462	chr18	60526154	60558766	+	3779	1	Dctn4||Dctn4|NM_001357462|	418.31	410.38	444.38	399.38	367.91	-0.157568	0.139462	1	Mm.272801	NM_026302	ENSMUSG00000024603	1110001K06Rik|4930547K17Rik|C130039E17Rik|p62	-	18|18 D3	dynactin 4	protein-coding	no	no	408.072	yes
Sirt7	NM_001363439	chr11	120618371	120625014	-	1849	1	Sirt7||Sirt7|NM_001363439|	325.22	313.75	343.38	320.01	329.72	-0.0251931	0.828522	1	Mm.292957	NM_153056	ENSMUSG00000025138	-	-	11|11 E2	sirtuin 7	protein-coding	no	no	326.416	yes
Dhx38	NM_178380	chr8	109547999	109565861	-	4422	1	Dhx38||Dhx38|NM_178380|	198.28	175.37	194.64	209.08	213.29	0.144209	0.273486	1	Mm.23705	NM_178380	ENSMUSG00000037993	5730550P09Rik|AI325984|AW540902|Ddx38|KIAA0224|Prp16	-	8|8 D3	DEAH (Asp-Glu-Ala-His) box polypeptide 38	protein-coding	no	no	198.132	yes
Coq3	NM_001356348	chr4	21879853	21912163	+	2651	1	Coq3||Coq3|NM_001356348|	30.22	40.56	44.07	44.38	37.26	0.0739802	0.765487	1	Mm.5662	NM_172687	ENSMUSG00000028247	4732433J24|C77934	-	4 A3|4 9.11 cM	coenzyme Q3 methyltransferase	protein-coding	no	no	39.298	yes
4933407K13Rik	NR_029443	chrX	75725458	75764699	-	3359	1	4933407K13Rik||4933407K13Rik|NR_029443|	26.6	47.72	39.48	50.35	44.71	0.313296	0.254536	1	Mm.162493	NR_029443	ENSMUSG00000087396	A130080L05Rik|Dxz4	-	X|X A7.3	RIKEN cDNA 4933407K13 gene	ncRNA	no	no	41.772	yes
Ilrun	NM_001033279	chr17	27751232	27820542	-	3803	1	Ilrun||Ilrun|NM_001033279|	482.39	478.38	598.62	492.4	531.84	-0.0367868	0.77508	1	Mm.196577	NM_001033279	ENSMUSG00000056692	AU020189|C030010A15|C80239|D17Wsu92e	-	17 A3.3|17 14.59 cM	inflammation and lipid regulator with UBA-like and NBR1-like domains	protein-coding	no	no	516.726	yes
Irak1	NM_001177973	chrX	74013914	74023921	-	3926	1	Irak1||Irak1|NM_001177973|	672.2	697.88	671.16	632.35	651.99	-0.0956917	0.343621	1	Mm.38241	NM_008363	ENSMUSG00000031392	AA408924|IRAK|IRAK-1|IRAK1-S|IRAK1b|Il1rak|Plpk|mPLK	-	X A7.3|X 37.61 cM	interleukin-1 receptor-associated kinase 1	protein-coding	no	no	665.116	yes
Cers5	NM_028015	chr15	99735592	99772515	-	1991	1	Cers5||Cers5|NM_028015|	182.56	211.15	200.15	183.48	188.15	-0.102936	0.436049	1	Mm.390821	NM_028015	ENSMUSG00000023021	2310081H14Rik|AU045339|AW544927|Lass5|Trh4	-	15|15 F1	ceramide synthase 5	protein-coding	no	no	193.098	yes
Prr14	NM_145589	chr7	127471614	127476758	+	2257	1	Prr14||Prr14|NM_145589|	394.13	386.52	459.07	413.89	422.86	0.00243053	0.973135	1	Mm.44183	NM_145589	ENSMUSG00000030822	BC006909	-	7|7 F3	proline rich 14	protein-coding	no	no	415.294	yes
Sart3	NM_001356621	chr5	113742444	113772400	-	4356	1	Sart3||Sart3|NM_001356621|	226.08	243.36	264.42	254.31	275.7	0.0991559	0.407725	1	Mm.29594	NM_016926	ENSMUSG00000018974	AU045857|mKIAA0156	-	5|5 F	squamous cell carcinoma antigen recognized by T cells 3	protein-coding	no	no	252.774	yes
Ap5b1	NM_001033448	chr19	5568024	5571261	+	3139	1	Ap5b1||Ap5b1|NM_001033448|	204.32	156.28	165.26	201.4	204.91	0.203536	0.179936	1	Mm.441906	NM_001033448	ENSMUSG00000049562	Gm962|beta-5	-	19|19 A	adaptor-related protein complex 5, beta 1 subunit	protein-coding	no	no	186.434	yes
Tm7sf3	NM_026281	chr6	146602276	146634592	-	3289	1	Tm7sf3||Tm7sf3|NM_026281|	269.61	342.38	293.8	342.2	294.33	0.0669392	0.629412	1	Mm.278037	NM_026281	ENSMUSG00000040234	2010003B14Rik|NARP1	-	6|6 G3	transmembrane 7 superfamily member 3	protein-coding	no	no	308.464	yes
Usf1	NM_009480	chr1	171411681	171418759	+	1819	1	Usf1||Usf1|NM_009480|	259.93	229.05	263.5	245.77	244.96	-0.0452307	0.73617	1	Mm.8	NM_009480	ENSMUSG00000026641	bHLHb11	-	1 H3|1 79.4 cM	upstream transcription factor 1	protein-coding	no	no	248.642	yes
Mpc1	NM_001364919	chr17	8284454	8297667	+	1125	1	Mpc1||Mpc1|NM_001364919|	42.31	54.88	43.15	52.91	46.57	0.0862342	0.773208	1	Mm.259910	NM_018819	ENSMUSG00000023861	0610006G08Rik|3830411I18Rik|Brp44l	-	17 A1|17 4.92 cM	mitochondrial pyruvate carrier 1	protein-coding	no	no	47.964	yes
Spsb3	NM_001163750	chr17	24886674	24892147	+	1940	1	Spsb3||Spsb3|NM_001163750|	135.41	124.07	158.84	145.07	122.02	-0.0778018	0.652743	1	Mm.274794	NM_027141	ENSMUSG00000024160	2310012N15Rik|3300001M01Rik|SSB3|Tce1|mKIAA4204	-	17|17 A3.3	splA/ryanodine receptor domain and SOCS box containing 3	protein-coding	no	no	137.082	yes
Ccl27a	NR_154591	chr4	41769470	41774176	-	2841	1	Ccl27a||Ccl27a|NR_154591|	21.76	23.86	22.95	16.21	26.08	-0.131859	0.741239	1	Mm.335946	NM_011336	ENSMUSG00000073888	ALP|AW558992|CTACK|CTAK|Ccl27|ESkine|ILC|PESKY|Scya27|Scya27a	-	4 A5|4 22.08 cM	chemokine (C-C motif) ligand 27A	protein-coding	no	no	22.172	yes
Reep3	NM_001204915	chr10	67009189	67096988	-	5533	1	Reep3||Reep3|NM_001204915|	1043.36	1079.63	938.33	986.5	910.92	-0.117867	0.298125	1	Mm.41272	NM_178606	ENSMUSG00000019873	D10Ucla1	-	10 B5.1|10 34.83 cM	receptor accessory protein 3	protein-coding	no	no	991.748	yes
Mettl5	NM_029280	chr2	69871195	69885615	-	958	1	Mettl5||Mettl5|NM_029280|	35.06	41.75	38.56	29.87	31.67	-0.332045	0.234286	1	Mm.10508	NM_029280	ENSMUSG00000051730	2810410A08Rik	-	2|2 C2	methyltransferase like 5	protein-coding	no	no	35.382	yes
Dctn3	NM_016890	chr4	41714798	41723163	-	953	1	Dctn3||Dctn3|NM_016890|	44.73	51.3	51.42	43.52	44.71	-0.169629	0.531434	1	Mm.29025	NM_016890	ENSMUSG00000028447	p24	-	4|4 A5	dynactin 3	protein-coding	no	no	47.136	yes
Zmym3	NM_019831	chrX	101404384	101420222	-	5381	1	Zmym3||Zmym3|NM_019831|	469.09	554.73	549.04	581.15	491.79	0.0220331	0.853659	1	Mm.23458	NM_019831	ENSMUSG00000031310	9030216B10Rik|AW122925|DXS6673El|Zfp261	-	X D|X 44.1 cM	zinc finger, MYM-type 3	protein-coding	no	no	529.16	yes
Usp19	NM_001168371	chr9	108490676	108502337	+	4659	1	Usp19||Usp19|NM_001168371|	582.74	583.36	628	643.44	657.58	0.108017	0.271475	1	Mm.289706	NM_027804	ENSMUSG00000006676	8430421I07Rik|AI047774|Zmynd9	-	9|9 F2	ubiquitin specific peptidase 19	protein-coding	no	no	619.024	yes
Tmem131	NM_018872	chr1	36792189	36939527	-	6467	1	Tmem131||Tmem131|NM_018872|	658.9	681.18	652.79	710.86	638.95	0.0116778	0.92472	1	Mm.186943	NM_018872	ENSMUSG00000026116	2610524E03Rik|CC28|D1Bwg0491e|Neg|RW1|YR-23|mKIAA0257	-	1 B|1 15.42 cM	transmembrane protein 131	protein-coding	no	no	668.536	yes
Actr2	NM_001362899	chr11	20062304	20112951	-	3665	1	Actr2||Actr2|NM_001362899|	1100.19	1195.35	1085.24	1003.57	1017.11	-0.170328	0.100715	1	Mm.259045	NM_146243	ENSMUSG00000020152	4921510D23Rik|AA409782|Arp2|D6Ertd746e	-	11 A3.1|11 12.88 cM	ARP2 actin-related protein 2	protein-coding	no	no	1080.29	yes
Ccdc88b	NM_001081291	chr19	6844623	6858211	-	4906	1	Ccdc88b||Ccdc88b|NM_001081291|	872.9	783.78	804.29	954.07	879.26	0.147718	0.17376	1	Mm.329596	NM_198008	ENSMUSG00000047810	2610041P08Rik|Ccdc88	-	19|19 A	coiled-coil domain containing 88B	protein-coding	no	no	858.86	yes
Bfar	NM_025976	chr16	13671858	13703612	+	2988	1	Bfar||Bfar|NM_025976|	280.49	299.43	285.54	283.32	283.15	-0.0369472	0.744474	1	Mm.223689	NM_025653	ENSMUSG00000022684	3010001A07Rik|3110001I22Rik|AI666707|AW107665|Bar|Rnf47	-	16|16 A1	bifunctional apoptosis regulator	protein-coding	no	no	286.386	yes
1600014C10Rik	NM_001085385	chr7	38183217	38197565	+	3330	1	1600014C10Rik||1600014C10Rik|NM_001085385|	382.04	423.5	375.52	401.09	376.29	-0.0279265	0.803773	1	Mm.187554	NM_028166		AI428873	-	7|7 B3	RIKEN cDNA 1600014C10 gene	protein-coding	no	no	391.688	yes
Gys1	NM_030678	chr7	45434839	45456617	+	3650	1	Gys1||Gys1|NM_030678|	81	78.74	83.55	92.16	88.48	0.143924	0.43746	1	Mm.275654	NM_030678	ENSMUSG00000003865	Gys3|MGS	-	7 B3|7 29.31 cM	glycogen synthase 1, muscle	protein-coding	no	no	84.786	yes
Aplp2	NM_001102455	chr9	31149557	31211848	-	3658	1	Aplp2||Aplp2|NM_001102455|	366.33	393.68	421.42	362.68	376.29	-0.106353	0.326985	1	Mm.19133	NM_009691	ENSMUSG00000031996	AI790698|APLP-2|CDEBP	-	9 A4|9 16.66 cM	amyloid beta (A4) precursor-like protein 2	protein-coding	no	no	384.08	yes
Zfp37	NM_001290353	chr4	62189537	62208202	-	3488	1	Zfp37||Zfp37|NM_001290353|	49.57	57.26	43.15	42.67	32.6	-0.405366	0.134073	1	Mm.5011	NM_009554	ENSMUSG00000028389	Tzn|Zfp-37	-	4 B3|4 33.04 cM	zinc finger protein 37	protein-coding	no	no	45.05	yes
Pmf1	NM_025928	chr3	88394138	88410397	-	1069	1	Pmf1||Pmf1|NM_025928|	30.22	41.75	28.46	26.45	39.12	-0.0378284	0.941171	1	Mm.36715	NM_025928	ENSMUSG00000028066	2600009M07Rik|AL033286|AW060657	-	3|3 F1	polyamine-modulated factor 1	protein-coding	no	no	33.2	yes
Bag5	NM_001324480	chr12	111709491	111712953	-	2288	1	Bag5||Bag5|NM_001324480|	139.03	104.98	132.21	115.21	122.02	-0.0951457	0.576431	1	Mm.44239	NM_027404	ENSMUSG00000049792	1600025G07Rik|4930405J06Rik|Bag-5	-	12|12 F1	BCL2-associated athanogene 5	protein-coding	no	no	122.69	yes
Cct8	NM_009840	chr16	87483325	87495869	-	2362	1	Cct8||Cct8|NM_009840|	220.04	178.94	213.93	199.69	204.91	-0.0280057	0.852717	1	Mm.328673	NM_009840	ENSMUSG00000025613	AI132397|Cctq|Tcpq	-	16|16 C3.3	chaperonin containing Tcp1, subunit 8 (theta)	protein-coding	no	no	203.502	yes
Zfp532	NM_001361053	chr18	65582418	65689436	+	6392	1	Zfp532||Zfp532|NM_001361053|	547.68	610.8	615.15	625.52	630.57	0.0744587	0.45988	1	Mm.286232	NM_207255	ENSMUSG00000042439	C530030I18Rik|Znf532|mKIAA1629	-	18|18 E1	zinc finger protein 532	protein-coding	no	no	605.944	yes
Rhot1	NM_001362868	chr11	80209051	80267907	+	4319	1	Rhot1||Rhot1|NM_001362868|	292.58	301.82	328.69	302.09	321.34	0.00361914	0.982819	1	Mm.489674	NM_021536	ENSMUSG00000017686	2210403N23Rik|AA415293|AF244542|AI834919|Arht1|C430039G08Rik|Miro1	-	11 B5|11 47.62 cM	ras homolog family member T1	protein-coding	no	no	309.304	yes
Mrpl37	NM_025500	chr4	107055874	107066866	-	1483	1	Mrpl37||Mrpl37|NM_025500|	141.45	121.68	129.46	139.95	122.95	-0.00103522	0.999348	1	Mm.29517	NM_025500	ENSMUSG00000028622	2300004O14Rik|AI132596|MRP-L2|Rpml2	-	4|4 C7	mitochondrial ribosomal protein L37	protein-coding	no	no	131.098	yes
Ppp2r3a	NM_001161362	chr9	101104989	101251832	-	6891	1	Ppp2r3a||Ppp2r3a|NM_001161362|	102.76	133.61	108.34	126.3	101.52	-0.0169815	0.94332	1	Mm.335386	NM_172144	ENSMUSG00000043154	3222402P14Rik|A730042E07|C530025M11Rik	-	9|9 E4	protein phosphatase 2, regulatory subunit B'', alpha	protein-coding	no	no	114.506	yes
1700021F05Rik	NM_026411	chr10	43525119	43541018	-	917	1	Mtres1||Mtres1|NM_026411|	26.6	27.44	33.05	29.01	23.29	-0.166374	0.59541	1	Mm.209953	NM_026411	ENSMUSG00000019797	-	-	10|10 B2	RIKEN cDNA 1700021F05 gene	protein-coding	no	no	27.878	yes
Hltf	NM_009210	chr3	20057811	20118491	+	4907	1	Hltf||Hltf|NM_009210|	448.54	456.91	434.28	419.01	429.38	-0.0852602	0.415956	1	Mm.209650	NM_009210	ENSMUSG00000002428	AF010600|BC057116|P113|Smarca3|Snf2l3	-	3 A2|3 6.15 cM	helicase-like transcription factor	protein-coding	no	no	437.624	yes
Trim12a	NM_023835	chr7	104299897	104315495	-	1510	1	Trim12a||Trim12a|NM_023835|	181.35	165.82	184.55	152.75	158.34	-0.201903	0.140869	1	Mm.458309	NM_023835	ENSMUSG00000066258	2310043C01Rik|Trim12	-	7|7 E3	tripartite motif-containing 12A	protein-coding	no	no	168.562	yes
Ablim1	NM_178688	chr19	57032733	57216032	-	7103	1	Ablim1||Ablim1|NM_178688|	146.29	164.63	178.12	193.72	142.51	0.0335468	0.839743	1	Mm.217161	NM_178688	ENSMUSG00000025085	2210411C18Rik|2610209L21Rik|4833406P10Rik|9330196J19Rik|AV079770|AW060987|AW215784|Limab1|mKIAA0059	-	19 D2|19 52.09 cM	actin-binding LIM protein 1	protein-coding	no	no	165.054	yes
Bcl2l12	NM_029410	chr7	44991222	44997579	-	1062	1	Bcl2l12||Bcl2l12|NM_029410|	38.69	54.88	61.52	55.47	58.68	0.118304	0.621644	1	Mm.261006	NM_029410	ENSMUSG00000003190	2810475P17Rik|5430429M05Rik|Bcl-L12|Bcl2-L12	-	7|7 B3	BCL2-like 12 (proline rich)	protein-coding	no	no	53.848	yes
Entpd6	NM_001370629	chr2	150749080	150771673	+	2538	1	Entpd6||Entpd6|NM_001370629|	146.29	163.44	162.51	158.73	164.86	0.0264047	0.849932	1	Mm.275524	NM_172117	ENSMUSG00000033068	2700026H11Rik|Cd39l2|NTPDase-6	-	2|2 G3	ectonucleoside triphosphate diphosphohydrolase 6	protein-coding	no	no	159.166	yes
Lipo3	NM_001013770	chr19	33555160	33590311	-	2821	1	Lipo3||Lipo3|NM_001013770|	95.51	100.21	92.73	98.99	91.28	-0.020943	0.902718	1	Mm.491242	NM_001013770	ENSMUSG00000024766	AI747699|Lipo1	-	19|19 C1	lipase, member O3	protein-coding	no	no	95.744	yes
Dmac1	NM_025849	chr4	75277351	75278292	-	728	1	Dmac1||Dmac1|NM_025849|	42.31	59.65	71.61	59.74	67.99	0.115464	0.608785	1	Mm.24332	NM_025849	ENSMUSG00000028398	1700027K24Rik|3110001D03Rik|Tmem261	-	4|4 C3	distal membrane arm assembly complex 1	protein-coding	no	no	60.26	yes
Sp4	NM_009239	chr12	118231686	118301440	-	9006	1	Sp4||Sp4|NM_009239|	431.61	378.17	336.96	459.97	382.81	0.13055	0.365215	1	Mm.34699	NM_009239	ENSMUSG00000025323	5730497N03Rik|HF-1b|HF1-b	-	12 F2|12 63.48 cM	trans-acting transcription factor 4	protein-coding	no	no	397.904	yes
Psmd5	NM_080554	chr2	34852089	34870962	-	2023	1	Psmd5||Psmd5|NM_080554|	132.99	121.68	157	121.18	129.47	-0.151317	0.355366	1	Mm.270632	NM_080554	ENSMUSG00000026869	1500032A03Rik|AW475925|S5b|W91691|mKIAA0072	-	2|2 B	proteasome (prosome, macropain) 26S subunit, non-ATPase, 5	protein-coding	no	no	132.464	yes
Brox	NM_027861	chr1	183276352	183297008	-	3419	1	Brox||Brox|NM_027861|	275.65	295.86	295.64	272.23	257.07	-0.138327	0.232207	1	Mm.392270	NM_027861	ENSMUSG00000046836	0610010K06Rik	-	1|1 H5	BRO1 domain and CAAX motif containing	protein-coding	no	no	279.29	yes
Aak1	NM_001040106	chr6	86849517	87003227	+	19304	1	Aak1||Aak1|NM_001040106|	678.25	690.73	582.1	671.6	596.11	-0.0485558	0.686928	1	Mm.221038	NM_177762	ENSMUSG00000057230	5530400K14Rik|9630042K20|AU067724|AU067726|BC028270|C79663|D6Ertd245e|R75501|mKIAA1048	-	6 D1|6 37.75 cM	AP2 associated kinase 1	protein-coding	no	no	643.758	yes
Gm32856	NR_144501	chr8	129263630	129271868	+	3780	1	Gm32856||Gm32856|NR_144501|	31.43	45.33	48.66	65.71	38.19	0.300888	0.309185	1		NM_001346808		-	-	8 E2|8	predicted gene, 32856	protein-coding	no	no	45.864	yes
Luzp1	NM_024452	chr4	136469761	136549318	+	7520	1	Luzp1||Luzp1|NM_024452|	234.55	178.94	234.12	238.09	264.52	0.202982	0.146662	1	Mm.485824	NM_024452	ENSMUSG00000001089	2700072H04Rik|AI266952|Luzp|mFLJ00226	-	4 D3|4 68.8 cM	leucine zipper protein 1	protein-coding	no	no	230.044	yes
Rb1	NM_009029	chr14	73195502	73325822	-	4603	1	Rb1||Rb1|NM_009029|	398.97	338.8	336.96	308.92	339.97	-0.154876	0.225682	1	Mm.273862	NM_009029	ENSMUSG00000022105	Rb|Rb-1|pRb|pp105	-	14 38.73 cM|14 D3	RB transcriptional corepressor 1	protein-coding	no	no	344.724	yes
Nelfcd	NM_020580	chr2	174415804	174427502	+	2250	1	Nelfcd||Nelfcd|NM_020580|	85.84	113.33	99.16	105.82	92.21	-0.0140318	0.955233	1	Mm.271709	NM_020580	ENSMUSG00000016253	2410003I03Rik|C77797|Th1|Th1l	-	2|2 H4	negative elongation factor complex member C/D, Th1l	protein-coding	no	no	99.272	yes
Napb	NM_019632	chr2	148694657	148732420	-	3672	1	Napb||Napb|NM_019632|	64.08	50.1	74.37	53.76	85.69	0.124021	0.626171	1	Mm.274308	NM_019632	ENSMUSG00000027438	Brp14|E161|I47|SNARE|b-SNAP	-	2|2 G3	N-ethylmaleimide sensitive fusion protein attachment protein beta	protein-coding	no	no	65.6	yes
Actr1b	NM_146107	chr1	36699202	36709925	-	2056	1	Actr1b||Actr1b|NM_146107|	309.5	294.66	316.76	295.27	323.2	-0.00330878	0.98391	1	Mm.28521	NM_146107	ENSMUSG00000037351	2310066K23Rik|AA960180|AI851923|Arp1b	-	1|1 B	ARP1 actin-related protein 1B, centractin beta	protein-coding	no	no	307.878	yes
Glipr1	NM_028608	chr10	111985448	111997264	-	1070	1	Glipr1||Glipr1|NM_028608|	45.94	47.72	62.43	44.38	52.16	-0.135348	0.653852	1	Mm.173790	NM_028608	ENSMUSG00000056888	2410114O14Rik|RTVP-1|RTVP1|mRTVP-1	-	10|10 D2	GLI pathogenesis-related 1 (glioma)	protein-coding	no	no	50.526	yes
Serpinb6a	NM_001243192	chr13	33917918	34002794	-	1489	1	Serpinb6a||Serpinb6a|NM_001243192|	30.22	50.1	55.09	29.01	36.33	-0.491184	0.11698	1	Mm.252210	NM_009254	ENSMUSG00000060147	4930482L21Rik|D330015H01Rik|PI-6|Serpinb6|Spi3|ovalbumin	-	13 A3.3|13 14.0 cM	serine (or cysteine) peptidase inhibitor, clade B, member 6a	protein-coding	no	no	40.15	yes
Rwdd3	NM_025637	chr3	121155402	121171695	-	1683	1	Rwdd3||Rwdd3|NM_025637|	19.34	17.89	13.77	34.13	18.63	0.643457	0.102222	1	Mm.263163	NM_025637	ENSMUSG00000028133	2510027J23Rik|3110037C01Rik|AI035684|AI662458|Rsume|X2CR1	-	3|3 G1	RWD domain containing 3	protein-coding	no	no	20.752	yes
	NM_001374776	chr16	32821707	32877729	-	5449	1	Rubcn||Rubcn|NM_001374776|	379.62	390.1	422.34	403.65	407.03	0.0148209	0.888503	1									no	no	400.548	yes
Odr4	NM_001357579	chr1	150361305	150393080	-	3208	1	Odr4||Odr4|NM_001357579|	211.57	211.15	235.96	203.1	204.91	-0.121095	0.344139	1	Mm.222093	NM_145511	ENSMUSG00000006010	1810053E15Rik|odr-4	-	1|1 G1	odr4 GPCR localization factor homolog	protein-coding	no	no	213.338	yes
Bub3	NM_001317350	chr7	131560494	131571892	+	2012	1	Bub3||Bub3|NM_001317350|	169.26	168.21	183.63	160.43	150.89	-0.170972	0.214742	1	Mm.927	NM_009774	ENSMUSG00000066979	AU019800|AU021329|AU043350|AW146323|C78067	-	7 F3|7 74.36 cM	BUB3 mitotic checkpoint protein	protein-coding	no	no	166.484	yes
Tubgcp4	NM_153387	chr2	121171168	121198770	+	4218	1	Tubgcp4||Tubgcp4|NM_153387|	206.74	186.1	208.42	193.72	213.29	0.00748529	0.97055	1	Mm.383499	NM_153387	ENSMUSG00000027263	4932441P04Rik|76p|D2Ertd435e|GCP-4	-	2 E5|2 60.37 cM	tubulin, gamma complex associated protein 4	protein-coding	no	no	201.654	yes
Ythdf3	NM_001358041	chr3	16183165	16217037	+	5287	1	Ythdf3||Ythdf3|NM_001358041|	905.54	857.74	814.39	819.24	837.34	-0.0658012	0.538115	1	Mm.23834	NM_172677	ENSMUSG00000047213	9130022A11Rik	-	3|3 A1	YTH N6-methyladenosine RNA binding protein 3	protein-coding	no	no	846.85	yes
BC065397	NR_033324	chrX	136742957	136803361	+	3207	1	BC065397||BC065397|NR_033324|	18.13	23.86	24.79	17.07	18.63	-0.338862	0.388612	1	Mm.443049	NM_001033001	ENSMUSG00000087368	R75336|parl7	-	X|X F1	cDNA sequence BC065397	ncRNA	no	no	20.496	yes
Prkcq	NM_008859	chr2	11172382	11301226	+	3278	1	Prkcq||Prkcq|NM_008859|	18.13	38.17	21.12	28.16	35.39	0.295731	0.420423	1	Mm.329993	NM_008859	ENSMUSG00000026778	A130035A12Rik|AW494342|PKC-0|PKC-theta|PKCtheta|Pkcq	-	2 A1|2 8.42 cM	protein kinase C, theta	protein-coding	no	no	28.194	yes
Impact	NM_008378	chr18	12971923	12992950	+	3742	1	Impact||Impact|NM_008378|	675.83	650.17	624.33	632.35	798.22	0.12356	0.310525	1	Mm.8154	NM_008378	ENSMUSG00000024423	E430016J11Rik	-	18|18 A1	impact, RWD domain protein	protein-coding	no	no	676.18	yes
Zfp809	NR_028420	chr9	22225703	22239693	+	1777	1	Zfp809||Zfp809|NR_028420|	90.67	73.96	70.7	96.43	73.58	0.11426	0.629184	1	Mm.290849	NM_172763	ENSMUSG00000057982	BB114266|C330026E23	-	9|9 A3	zinc finger protein 809	protein-coding	no	no	81.068	yes
Irgm1	NM_008326	chr11	48865245	48871420	-	2300	1	Irgm1||Irgm1|NM_008326|	313.13	314.94	376.44	412.18	333.45	0.14216	0.265284	1	Mm.29938	NM_008326	ENSMUSG00000046879	Ifggd3|Ifi1|Iigp3|Iipg3|Irgm	-	11|11 B1.2	immunity-related GTPase family M member 1	protein-coding	no	no	350.028	yes
Nfu1	NM_001170591	chr6	87009836	87028461	+	940	1	Nfu1||Nfu1|NM_001170591|	48.36	50.1	60.6	40.11	42.85	-0.375481	0.126982	1	Mm.23809	NM_020045	ENSMUSG00000029993	0610006G17Rik|CGI-33|Hirip5	-	6|6 D1	NFU1 iron-sulfur cluster scaffold	protein-coding	no	no	48.404	yes
Gskip	NM_178613	chr12	105685352	105703057	+	2781	1	Gskip||Gskip|NM_178613|	88.26	82.31	112.01	87.04	88.48	-0.1247	0.528912	1	Mm.248019	NM_178613	ENSMUSG00000044715	4933433P14Rik	-	12|12 E	GSK3B interacting protein	protein-coding	no	no	91.62	yes
Fgl2	NM_008013	chr5	21372673	21378386	+	3766	1	Fgl2||Fgl2|NM_008013|	118.48	113.33	117.52	114.35	93.14	-0.17347	0.302382	1	Mm.292100	NM_008013	ENSMUSG00000039899	AI385601|musfiblp	-	5 A3|5 9.83 cM	fibrinogen-like protein 2	protein-coding	no	no	111.364	yes
Tprgl	NR_151647	chr4	154157486	154160684	-	1778	1	Tprgl||Tprgl|NR_151647|	324.01	275.58	347.05	291	310.16	-0.0859811	0.506034	1	Mm.288737	NM_026388	ENSMUSG00000029030	1200015A19Rik|Svap30|Tprg1l|mover	-	4|4 E2	transformation related protein 63 regulated like	protein-coding	no	no	309.56	yes
Spryd7	NM_025697	chr14	61531851	61556886	-	4135	1	Spryd7||Spryd7|NM_025697|	36.27	51.3	55.09	50.35	55.88	0.135834	0.562363	1	Mm.282706	NM_025697	ENSMUSG00000021930	6330409N04Rik|Clld6	-	14|14 D1	SPRY domain containing 7	protein-coding	no	no	49.778	yes
Hgs	NM_008244	chr11	120467635	120483984	+	2862	1	Hgs||Hgs|NM_008244|	235.75	263.65	298.39	247.48	275.7	-0.041336	0.775948	1	Mm.7919	NM_008244	ENSMUSG00000025793	Hgr|Hrs|ZFYVE8|tn	-	11 E2|11 84.16 cM	HGF-regulated tyrosine kinase substrate	protein-coding	no	no	264.194	yes
Cdc37l1	NM_001302443	chr19	28990352	29020237	+	5478	1	Cdc37l1||Cdc37l1|NM_001302443|	217.62	255.29	215.76	279.91	230.06	0.144547	0.319522	1	Mm.78875	NM_025950	ENSMUSG00000024780	2700033A15Rik|BB159850|Cdc37l|Harc	-	19|19 C1	cell division cycle 37-like 1	protein-coding	no	no	239.728	yes
Pkm	NM_011099	chr9	59656368	59679375	+	2411	1	Pkm||Pkm|NM_011099|	429.19	428.27	441.62	423.27	437.77	-0.0210094	0.844631	1	Mm.326167	NM_011099	ENSMUSG00000032294	AA414905|AL024370|AL024424|Pk-2|Pk-3|Pk3|Pkm2	-	9 B|9 32.03 cM	pyruvate kinase, muscle	protein-coding	no	no	432.024	yes
Cdk2ap2	NM_026373	chr19	4097351	4099017	+	904	1	Cdk2ap2||Cdk2ap2|NM_026373|	120.9	137.19	149.66	121.18	131.33	-0.124911	0.435323	1	Mm.29609	NM_026373	ENSMUSG00000024856	5830466O21Rik|D19Ertd144e|Doc-1r	-	19|19 A	CDK2-associated protein 2	protein-coding	no	no	132.052	yes
Idh3b	NM_130884	chr2	130279309	130284451	-	1497	1	Idh3b||Idh3b|NM_130884|	163.21	169.4	174.45	159.58	149.96	-0.138227	0.310475	1	Mm.29590	NM_130884	ENSMUSG00000027406	C78231	-	2|2 F1	isocitrate dehydrogenase 3 (NAD+) beta	protein-coding	no	no	163.32	yes
1700010I14Rik	NM_025851	chr17	8988333	9008319	+	1859	1	1700010I14Rik||1700010I14Rik|NM_025851|	14.51	21.47	28.46	25.6	21.42	0.0980053	0.806283	1	Mm.67591	NM_025851	ENSMUSG00000023873	-	-	17|17 A1	RIKEN cDNA 1700010I14 gene	protein-coding	no	no	22.292	yes
Atxn7l2	NM_175183	chr3	108202228	108210527	-	2608	1	Atxn7l2||Atxn7l2|NM_175183|	97.93	108.56	104.67	103.26	108.04	0.0150467	0.955479	1	Mm.187326	NM_175183	ENSMUSG00000048997	2610528J18Rik	-	3|3 F2.3	ataxin 7-like 2	protein-coding	no	no	104.492	yes
Dguok	NM_013764	chr6	83480214	83506969	-	1097	1	Dguok||Dguok|NM_013764|	90.67	101.4	107.42	81.92	97.8	-0.170626	0.350812	1	Mm.42234	NM_013764	ENSMUSG00000014554	dGK|dGK1|dGK2|dGK3	-	6 C3|6 35.94 cM	deoxyguanosine kinase	protein-coding	no	no	95.842	yes
Birc3	NM_007464	chr9	7848701	7873170	-	2794	1	Birc3||Birc3|NM_007464|	371.16	297.05	366.34	350.74	407.03	0.120433	0.341801	1	Mm.2026	NM_007464	ENSMUSG00000032000	AW107670|Api1|Api2|Birc2|C-IAP2|HIAP2|IAP1|IAP2|MIAP1|MIAP2|MIHB|MIHC|RNF49|cIAP-1|cIAP-2|cIAP1|cIAP2	-	9|9 A1	baculoviral IAP repeat-containing 3	protein-coding	no	no	358.464	yes
Pigyl	NM_001082532	chr9	22156846	22158354	+	688	1	Pigyl||Pigyl|NM_001082532|	38.69	35.79	37.64	34.99	37.26	-0.0604036	0.874318	1	Mm.28924	NM_025457	ENSMUSG00000010607	1810008A14Rik|PIG-Y|Pigy	-	9|9 A3	phosphatidylinositol glycan anchor biosynthesis, class Y-like	protein-coding	no	no	36.874	yes
Bach1	NM_007520	chr16	87698954	87733346	+	5849	1	Bach1||Bach1|NM_007520|	1282.74	1126.16	1099.93	1220.32	1319.82	0.104381	0.366536	1	Mm.26147	NM_007520	ENSMUSG00000025612	6230421P05Rik|AI323795	-	16|16 C3.3	BTB and CNC homology 1, basic leucine zipper transcription factor 1	protein-coding	no	no	1209.79	yes
Vamp5	NM_016872	chr6	72368049	72380468	-	1643	1	Vamp5||Vamp5|NM_016872|	42.31	45.33	47.74	36.7	41.91	-0.216219	0.422876	1	Mm.440321	NM_016872	ENSMUSG00000073002	AF119384|Camp	-	6|6 C1	vesicle-associated membrane protein 5	protein-coding	no	no	42.798	yes
Eftud2	NM_001109995	chr11	102838472	102880975	-	3278	1	Eftud2||Eftud2|NM_001109995|	145.08	184.91	181.79	169.82	175.11	0.00091688	1	1	Mm.873	NM_011431	ENSMUSG00000020929	116kDa|Snrp116|U5-116kD	-	11|11 E1	elongation factor Tu GTP binding domain containing 2	protein-coding	no	no	171.342	yes
Asah2	NM_018830	chr19	31984651	32103140	-	4771	1	Asah2||Asah2|NM_018830|	112.44	145.54	133.13	58.03	130.4	-0.48726	0.0645258	1	Mm.491229	NM_018830	ENSMUSG00000024887	AI585898	-	19|19 C1	N-acylsphingosine amidohydrolase 2	protein-coding	no	no	115.908	yes
Zbtb18	NM_013915	chr1	177445821	177450764	+	4943	1	Zbtb18||Zbtb18|NM_013915|	1074.8	1051	1076.97	1181.92	1071.13	0.0651971	0.524604	1	Mm.330700	NM_013915	ENSMUSG00000063659	RP58|Zfp238|Znf238.|zfp-238	-	1|1 H4	zinc finger and BTB domain containing 18	protein-coding	no	no	1091.16	yes
Usp25	NM_013918	chr16	77014069	77116780	+	4366	1	Usp25||Usp25|NM_013918|	417.1	320.91	347.97	337.94	360.46	-0.0645984	0.631152	1	Mm.40986	NM_013918	ENSMUSG00000022867	-	-	16|16 C3.1	ubiquitin specific peptidase 25	protein-coding	no	no	356.876	yes
Wapl	NM_001301330	chr14	34673928	34747983	+	6296	1	Wapl||Wapl|NM_001301330|	632.3	510.59	558.23	582	544.88	-0.0216316	0.858516	1	Mm.27957	NM_001004436	ENSMUSG00000041408	A530089A20Rik|BC037674|DIF-2|FOE|Wapal	-	14|14 B	WAPL cohesin release factor	protein-coding	no	no	565.6	yes
Papss1	NM_001289479	chr3	131564768	131643671	+	2861	1	Papss1||Papss1|NM_001289479|	274.44	294.66	274.52	232.97	281.29	-0.142097	0.270318	1	Mm.244912	NM_011863	ENSMUSG00000028032	AI325286|Asapk|SK1	-	3 G3|3 61.05 cM	3'-phosphoadenosine 5'-phosphosulfate synthase 1	protein-coding	no	no	271.576	yes
Kdm4c	NM_144787	chr4	74251879	74405864	+	4214	1	Kdm4c||Kdm4c|NM_144787|	159.59	172.98	163.43	156.17	174.17	-0.0130325	0.948304	1	Mm.209059	NM_144787	ENSMUSG00000028397	2410141F18Rik|AA517467|Gasc1|Jmjd2c	-	4|4 C3	lysine (K)-specific demethylase 4C	protein-coding	no	no	165.268	yes
Rab39	NM_175562	chr9	53684110	53706232	-	2968	1	Rab39||Rab39|NM_175562|	360.28	363.85	333.28	337.94	299.92	-0.152818	0.199241	1	Mm.290285	NM_175562	ENSMUSG00000055069	C230094F14Rik|Rab39a	-	9|9 A5.3	RAB39, member RAS oncogene family	protein-coding	no	no	339.054	yes
H3f3b	NM_008211	chr11	116021961	116024504	-	1986	1	H3f3b||H3f3b|NM_008211|	805.19	685.96	653.71	605.89	663.17	-0.18616	0.135105	1	Mm.18516	NM_008211	ENSMUSG00000016559	9430068D06Rik|H3.3B	-	11|11 E2	H3 histone, family 3B	protein-coding	no	no	682.784	yes
Eef2k	NM_007908	chr7	120842831	120907219	+	6314	1	Eef2k||Eef2k|NM_007908|	1068.75	1036.69	1049.43	1041.12	1067.4	-0.00942343	0.92767	1	Mm.25997	NM_007908	ENSMUSG00000035064	C86191|eEF-2K	-	7|7 F2	eukaryotic elongation factor-2 kinase	protein-coding	no	no	1052.68	yes
Sfxn1	NM_027324	chr13	54071845	54108345	+	2789	1	Sfxn1||Sfxn1|NM_027324|	136.62	159.86	178.12	174.09	149.03	0.0153399	0.935012	1	Mm.134191	NM_027324	ENSMUSG00000021474	2810002O05Rik|A930015P12Rik|f	-	13 B1|13 28.4 cM	sideroflexin 1	protein-coding	no	no	159.544	yes
Tmem138	NM_028411	chr19	10570478	10577386	-	1605	1	Tmem138||Tmem138|NM_028411|	47.15	47.72	53.25	55.47	40.98	-0.0437562	0.900017	1	Mm.391194	NM_028411	ENSMUSG00000024666	1700113I01Rik|2900055D14Rik	-	19|19 A	transmembrane protein 138	protein-coding	no	no	48.914	yes
Skp2	NM_013787	chr15	9111982	9140454	-	3191	1	Skp2||Skp2|NM_013787|	53.2	52.49	55.09	59.74	53.09	0.0643395	0.826044	1	Mm.35584	NM_013787	ENSMUSG00000054115	4930500A04Rik|FBXL1|FWD1|p45	-	15|15 A1	S-phase kinase-associated protein 2 (p45)	protein-coding	no	no	54.722	yes
Etv1	NM_001347379	chr12	38780082	38868215	+	4230	1	Etv1||Etv1|NM_001347379|	146.29	163.44	139.56	150.19	127.6	-0.112907	0.458846	1	Mm.4866	NM_007960	ENSMUSG00000004151	ER81|Etsrp81	-	12 A3|12 17.99 cM	ets variant 1	protein-coding	no	no	145.416	yes
Smyd5	NM_144918	chr6	85431976	85446429	+	2468	1	Smyd5||Smyd5|NM_144918|	154.75	204	203.83	232.12	174.17	0.104682	0.521437	1	Mm.219946	NM_144918	ENSMUSG00000033706	AW536703|NN8-4AG|Rai15|Rrg1	-	6 C3|6 37.44 cM	SET and MYND domain containing 5	protein-coding	no	no	193.774	yes
Fcgr2b	NM_001077189	chr1	170960559	170976071	-	1531	1	Fcgr2b||Fcgr2b|NM_001077189|	487.23	478.38	452.64	448.87	417.27	-0.136565	0.211317	1	Mm.425062	NM_010187	ENSMUSG00000026656	AI528646|CD32|F630109E10Rik|Fc[g]RII|FcgRII|Fcgr2|Fcgr2a|Fcr-2|Fcr-3|Ly-17|Ly-m20|LyM-1|Lym-1|fcRII	-	1 H3|1 78.02 cM	Fc receptor, IgG, low affinity IIb	protein-coding	no	no	456.878	yes
Daglb	NM_144915	chr5	143464493	143504442	+	3213	1	Daglb||Daglb|NM_144915|	939.39	847.01	817.14	826.92	869.94	-0.0461498	0.679958	1	Mm.469963	NM_144915	ENSMUSG00000039206	E330036I19Rik	-	5|5 G2	diacylglycerol lipase, beta	protein-coding	no	no	860.08	yes
Pik3r2	NM_008841	chr8	70768176	70776712	-	3133	1	Pik3r2||Pik3r2|NM_008841|	309.5	263.65	301.15	349.03	306.44	0.157926	0.202049	1	Mm.12945	NM_008841	ENSMUSG00000031834	p85beta	-	8 B3.3|8 34.15 cM	phosphoinositide-3-kinase regulatory subunit 2	protein-coding	no	no	305.954	yes
Atp6v0e	NM_025272	chr17	26676396	26699646	+	789	1	Atp6v0e||Atp6v0e|NM_025272|	143.87	143.16	164.35	128.01	146.23	-0.152595	0.316863	1	Mm.22602	NM_025272	ENSMUSG00000015575	Atp6k|Atp6v0e1|M9.2	-	17|17 A3.3	ATPase, H+ transporting, lysosomal V0 subunit E	protein-coding	no	no	145.124	yes
H1f0	NM_008197	chr15	79028212	79030500	+	2288	1	H1f0||H1f0|NM_008197|	243.01	251.72	244.22	238.94	210.5	-0.140901	0.259906	1	Mm.24350	NM_008197	ENSMUSG00000096210	D130017D06Rik|H1(0)|H1fv	-	15 E1|15 37.7 cM	H1 histone family, member 0	protein-coding	no	no	237.678	yes
Stx12	NM_133887	chr4	132854064	132884458	-	2303	1	Stx12||Stx12|NM_133887|	221.25	220.7	229.53	224.44	212.36	-0.0465497	0.711994	1	Mm.28237	NM_133887	ENSMUSG00000028879	AI850350|AU041521|Stx13	-	4 D2.3|4 66.01 cM	syntaxin 12	protein-coding	no	no	221.656	yes
Utp4	NM_011574	chr8	106893640	106923094	+	2216	1	Utp4||Utp4|NM_011574|	64.08	69.19	75.29	69.12	92.21	0.193516	0.350128	1	Mm.10665	NM_011574	ENSMUSG00000041438	Cirh1a|Cirhin|Naic|Teg-292|Tex292	-	8|8 D3	UTP4 small subunit processome component	protein-coding	no	no	73.978	yes
Mocs3	NM_001160330	chr2	168230622	168232303	+	1681	1	Mocs3||Mocs3|NM_001160330|	70.12	57.26	69.78	73.39	78.24	0.190009	0.333429	1	Mm.482182	NM_001160330	ENSMUSG00000074576	1700020H17Rik|Uba4	-	2|2 H3	molybdenum cofactor synthesis 3	protein-coding	no	no	69.758	yes
Cd1d1	NM_007639	chr3	86995836	86999340	-	1832	1	Cd1d1||Cd1d1|NM_007639|	47.15	71.58	69.78	89.6	63.34	0.271361	0.251579	1	Mm.1894	NM_007639	ENSMUSG00000028076	AI747460|CD1.1|Cd1a|Cd1d|Ly-38	-	3 F1|3 37.91 cM	CD1d1 antigen	protein-coding	no	no	68.29	yes
BC035044	NM_001254946	chr6	128848044	128891124	-	2607	1	BC035044||BC035044|NM_001254946|	298.62	322.1	354.4	341.35	300.85	-0.0305934	0.814606	1	Mm.30745	NM_001254946	ENSMUSG00000090164	-	-	6|6 F3	cDNA sequence BC035044	protein-coding	no	no	323.464	yes
Clec4a1	NM_199311	chr6	122921848	122934619	+	1547	1	Clec4a1||Clec4a1|NM_199311|	22.97	41.75	56.92	30.72	37.26	-0.283405	0.45427	1	Mm.297275	NM_199311	ENSMUSG00000049037	BC049354|Dcir4	-	6|6 F2	C-type lectin domain family 4, member a1	protein-coding	no	no	37.924	yes
BC004004	NM_030561	chr17	29268788	29302887	+	2792	1	BC004004||BC004004|NM_030561|	170.47	187.3	199.24	189.45	176.04	-0.03656	0.81761	1	Mm.290116	NM_030561	ENSMUSG00000052712	2400006G15Rik	-	17|17 A3.3	cDNA sequence BC004004	protein-coding	no	no	184.5	yes
Abcb6	NM_023732	chr1	75171641	75180392	-	3005	1	Abcb6||Abcb6|NM_023732|	65.29	70.38	74.37	75.95	61.47	-0.03752	0.861212	1	Mm.28663	NM_023732	ENSMUSG00000026198	1200005B17Rik	-	1|1 C4	ATP-binding cassette, sub-family B (MDR/TAP), member 6	protein-coding	no	no	69.492	yes
Ggnbp2	NM_001364111	chr11	84832361	84870790	-	3099	1	Ggnbp2||Ggnbp2|NM_001364111|	285.32	380.56	351.65	330.26	340.9	-0.0279991	0.834179	1	Mm.356653	NM_153144	ENSMUSG00000020530	AI451896|C75939|D330017P12Rik|DIF-3|Zfp403	-	11|11 C	gametogenetin binding protein 2	protein-coding	no	no	337.738	yes
Dnajc9	NM_134081	chr14	20384638	20388910	-	1622	1	Dnajc9||Dnajc9|NM_134081|	27.81	20.28	30.3	22.19	28.87	-0.0609349	0.925597	1	Mm.2871	NM_134081	ENSMUSG00000021811	5330419I01Rik|AU020082	-	14|14 A3	DnaJ heat shock protein family (Hsp40) member C9	protein-coding	no	no	25.89	yes
Zfp141	NM_001309388	chr7	42473386	42505753	-	4083	1	Zfp141||Zfp141|NM_001309388|	140.24	151.51	165.26	186.89	153.68	0.148155	0.324447	1	Mm.333810	NM_001309388	ENSMUSG00000092416	-	-	7|7 B3	zinc finger protein 141	protein-coding	no	no	159.516	yes
Etv5	NM_001358428	chr16	22381313	22438368	-	4840	1	Etv5||Etv5|NM_001358428|	597.24	747.99	653.71	634.91	629.64	-0.0873511	0.447752	1	Mm.155708	NM_023794	ENSMUSG00000013089	1110005E01Rik|8430401F14Rik|ERM	-	16|16 B1	ets variant 5	protein-coding	no	no	652.698	yes
Dnajc10	NM_024181	chr2	80315466	80354055	+	4009	1	Dnajc10||Dnajc10|NM_024181|	172.89	167.02	173.53	170.67	143.44	-0.132319	0.358809	1	Mm.21762	NM_024181	ENSMUSG00000027006	1200006L06Rik|D2Ertd706e|ERdj5|JPDI	-	2|2 C3	DnaJ heat shock protein family (Hsp40) member C10	protein-coding	no	no	165.51	yes
Prr5l	NM_001083810	chr2	101714285	101797707	-	4279	1	Prr5l||Prr5l|NM_001083810|	47.15	64.42	78.04	63.15	67.06	0.0172464	0.947133	1	Mm.24138	NM_175181	ENSMUSG00000032841	2600010E01Rik|4833411O04Rik|Protor-2|Protor2	-	2|2 E2	proline rich 5 like	protein-coding	no	no	63.964	yes
Gtf3a	NM_025652	chr5	146948657	146955614	+	1281	1	Gtf3a||Gtf3a|NM_025652|	78.58	81.12	83.55	77.66	99.66	0.111814	0.552932	1	Mm.196528	NM_025652	ENSMUSG00000016503	2010015D03Rik|2610111I01Rik|5330403M05Rik	-	5|5 G3	general transcription factor III A	protein-coding	no	no	84.114	yes
Sympk	NM_026605	chr7	19024377	19054622	+	4068	1	Sympk||Sympk|NM_026605|	305.88	304.21	330.53	326.84	324.13	0.0404598	0.723199	1	Mm.130902	NM_026605	ENSMUSG00000023118	1500016F02Rik|4632415H16Rik|AA125406|AI449890|SPK|SYM	-	7|7 A3	symplekin	protein-coding	no	no	318.318	yes
Zfp688	NM_026999	chr7	127418966	127422034	-	1011	1	Zfp688||Zfp688|NM_026999|	33.85	45.33	52.33	38.4	46.57	-0.072151	0.827464	1	Mm.20301	NM_026999	ENSMUSG00000045251	2810407K09Rik|AI326029	-	7|7 F3	zinc finger protein 688	protein-coding	no	no	43.296	yes
Mphosph9	NM_001081323	chr5	124250959	124327972	-	7704	1	Mphosph9||Mphosph9|NM_001081323|	209.16	221.89	254.32	214.2	233.79	-0.0463893	0.741524	1	Mm.60224	NM_001081323	ENSMUSG00000038126	4930548D04Rik|9630025B04Rik|AW413446|AW547060|B930097C17Rik|C87456|MPP-9|MPP9	-	5|5 F	M-phase phosphoprotein 9	protein-coding	no	no	226.672	yes
Nfatc2	NM_001136073	chr2	168476410	168590365	-	6807	1	Nfatc2||Nfatc2|NM_001136073|	1008.3	1008.06	1008.11	1176.8	1098.14	0.161763	0.105014	1	Mm.116802	NM_010899	ENSMUSG00000027544	AI607462|NF-ATc2|NF-ATp|NFAT1|NFAT1-D|Nfatp	-	2 H3|2 88.91 cM	nuclear factor of activated T cells, cytoplasmic, calcineurin dependent 2	protein-coding	no	no	1059.88	yes
Ssbp1	NM_001286663	chr6	40471468	40481823	+	2005	1	Ssbp1||Ssbp1|NM_001286663|	70.12	75.16	89.98	64	73.58	-0.211666	0.316661	1	Mm.276356	NM_028358	ENSMUSG00000029911	2810480P10Rik|G630031O20Rik|MtSSB|mtDBP	-	6|6 B1	single-stranded DNA binding protein 1	protein-coding	no	no	74.568	yes
Casp2	NM_007610	chr6	42264985	42282508	+	3508	1	Casp2||Casp2|NM_007610|	288.95	299.43	298.39	274.79	267.32	-0.135964	0.233205	1	Mm.3921	NM_007610	ENSMUSG00000029863	CASP-2|ICH-1|NEDD-2|Nedd2	-	6 B2.1|6 20.54 cM	caspase 2	protein-coding	no	no	285.776	yes
Gon7	NM_001142938	chr12	102753275	102757810	-	1159	1	Gon7||Gon7|NM_001142938|	33.85	20.28	34.89	23.04	18.63	-0.525076	0.150338	1	Mm.291222	NM_001142938	ENSMUSG00000091931	-	-	12|12 E	GON7, KEOPS complex subunit homolog	protein-coding	no	no	26.138	yes
Zfp560	NM_001004190	chr9	20345136	20385158	-	4719	1	Zfp560||Zfp560|NM_001004190|	62.87	79.93	70.7	75.95	52.16	-0.155777	0.495114	1	Mm.379669	NM_001004190	ENSMUSG00000045519	2310030G09Rik|Znf560	-	9|9 A3	zinc finger protein 560	protein-coding	no	no	68.322	yes
Dhdh	NM_027903	chr7	45473563	45488805	-	2734	1	Dhdh||Dhdh|NM_027903|	107.6	118.1	105.59	93.02	83.83	-0.325311	0.0520762	1	Mm.34208	NM_027903	ENSMUSG00000011382	1300018L09Rik|AA591799|B830008H07Rik|Xld-1|Xld1	-	7 B3|7 29.32 cM	dihydrodiol dehydrogenase (dimeric)	protein-coding	no	no	101.628	yes
Ikzf5	NM_175115	chr7	131388649	131410478	-	4383	1	Ikzf5||Ikzf5|NM_175115|	163.21	158.66	203.83	180.92	162.07	-0.0484895	0.780509	1	Mm.334273	NM_175115	ENSMUSG00000040167	2610034F18Rik|PEGASUS|Zfpn1a5	-	7|7 F3	IKAROS family zinc finger 5	protein-coding	no	no	173.738	yes
Dnaaf5	NM_001081265	chr5	139150235	139186510	+	3413	1	Dnaaf5||Dnaaf5|NM_001081265|	118.48	97.82	125.78	110.94	113.63	-0.0398264	0.852093	1	Mm.5547	NM_001081265	ENSMUSG00000025857	BC053401|C76907|Heatr2	-	5|5 G2	dynein, axonemal assembly factor 5	protein-coding	no	no	113.33	yes
BC048403	NM_173022	chr10	121739930	121752865	+	3125	1	BC048403||BC048403|NM_173022|	66.49	112.14	84.47	104.96	84.76	0.106673	0.647401	1	Mm.209172	NM_173022	ENSMUSG00000053684	E030027L10	-	10|10 D2	cDNA sequence BC048403	protein-coding	no	no	90.564	yes
Igip	NM_001267796	chr18	36300101	36301478	+	1377	1	Igip||Igip|NM_001267796|	79.79	155.09	137.72	138.25	117.36	0.0297721	0.883473	1	Mm.426423	NM_001267796	ENSMUSG00000110185	6330403M23Rik	-	18|18 B2	IgA inducing protein	protein-coding	no	no	125.642	yes
Rnh1	NM_145135	chr7	141160326	141168936	-	1784	1	Rnh1||Rnh1|NM_145135|	276.86	285.12	298.39	261.13	252.41	-0.171817	0.131458	1	Mm.197493	NM_145135	ENSMUSG00000038650	AW546468|C80305|RNH	-	7|7 F5	ribonuclease/angiogenin inhibitor 1	protein-coding	no	no	274.782	yes
H2-Ob	NM_010389	chr17	34238905	34245908	+	2659	1	H2-Ob||H2-Ob|NM_010389|	288.95	275.58	278.19	221.02	273.84	-0.197082	0.135862	1	Mm.327358	NM_010389	ENSMUSG00000041538	A-beta-2|A-beta2|H-2Ab|H-2I|H-2Ob|H2-Ab|H2-Ab2|H2-IAb2|Ob|vic1	-	17 B1|17 17.98 cM	histocompatibility 2, O region beta locus	protein-coding	no	no	267.516	yes
Ift20	NM_018854	chr11	78536361	78541732	+	1125	1	Ift20||Ift20|NM_018854|	30.22	44.14	46.82	40.11	40.98	-0.0169601	1	1	Mm.358671	NM_018854	ENSMUSG00000001105	0610009H04Rik|AU015496|mIFT20	-	11|11 B5	intraflagellar transport 20	protein-coding	no	no	40.454	yes
Lnpep	NM_172827	chr17	17527723	17624489	-	5146	1	Lnpep||Lnpep|NM_172827|	664.95	423.5	318.59	623.82	451.74	0.177841	0.466627	1	Mm.328807	NM_172827	ENSMUSG00000023845	2010309L07Rik|4732490P18Rik|CAP|IRAP|PLAP|gp160|vp165	-	17|17 A3.2	leucyl/cystinyl aminopeptidase	protein-coding	no	no	496.52	yes
Amfr	NM_011787	chr8	93971588	94012640	-	3651	1	Amfr||Amfr|NM_011787|	860.81	844.62	851.11	752.67	776.8	-0.168999	0.0891057	1	Mm.34641	NM_011787	ENSMUSG00000031751	gp78	-	8 C5|8 45.96 cM	autocrine motility factor receptor	protein-coding	no	no	817.202	yes
Nek9	NM_145138	chr12	85299514	85339362	-	5343	1	Nek9||Nek9|NM_145138|	576.69	629.89	579.34	562.37	601.69	-0.0447059	0.674536	1	Mm.29071	NM_145138	ENSMUSG00000034290	C130021H08Rik	-	12|12 D1	NIMA (never in mitosis gene a)-related expressed kinase 9	protein-coding	no	no	589.996	yes
Uqcc1	NM_001355441	chr2	155846886	155930310	-	2652	1	Uqcc1||Uqcc1|NM_001355441|	148.71	138.38	127.62	143.37	144.37	0.0518733	0.773872	1	Mm.158827	NM_018888	ENSMUSG00000005882	2310079L17Rik|2410003P15Rik|3110038N19Rik|Bfzb|Bfzp|Cbp3|Uqcc	-	2|2 H1	ubiquinol-cytochrome c reductase complex assembly factor 1	protein-coding	no	no	140.49	yes
Il4i1b	NM_001171024	chr7	44816370	44840803	+	2283	1	Il4i1b||Il4i1b|NM_001171024|	71.33	62.03	39.48	53.76	84.76	0.25819	0.403502	1	Mm.2565	NM_001171024	ENSMUSG00000074141	Fig1|Gm21948|Il4i1|LAAO|LAO|Nup62-il4i1|mFIG1	-	7 B3|7	interleukin 4 induced 1B	protein-coding	no	no	62.272	yes
Gamt	NM_001347119	chr10	80258151	80261012	-	1025	1	Gamt||Gamt|NM_001347119|	18.13	25.05	25.71	10.24	29.81	-0.227856	0.667641	1	Mm.7329	NM_010255	ENSMUSG00000020150	AA571402|Spintz1	-	10 C1|10 39.72 cM	guanidinoacetate methyltransferase	protein-coding	no	no	21.788	yes
R3hdm1	NM_001357482	chr1	128141987	128237738	+	4690	1	R3hdm1||R3hdm1|NM_001357482|	296.2	303.01	325.02	327.7	332.52	0.0857348	0.44363	1	Mm.221041	NM_181750	ENSMUSG00000056211	R3hdm	-	1|1 E3	R3H domain containing 1	protein-coding	no	no	316.89	yes
Hsd17b12	NM_019657	chr2	94032697	94157909	-	1818	1	Hsd17b12||Hsd17b12|NM_019657|	177.72	224.28	214.84	177.5	199.32	-0.140717	0.321481	1	Mm.22505	NM_019657	ENSMUSG00000027195	2610510O05Rik|AI172963|KIK-I|Kik1	-	2|2 E1	hydroxysteroid (17-beta) dehydrogenase 12	protein-coding	no	no	198.732	yes
Cyren	NM_199145	chr6	34871771	34878065	-	3718	1	Cyren||Cyren|NM_199145|	100.35	165.82	171.69	162.14	129.47	-0.0142173	0.975959	1	Mm.248440	NM_199145	ENSMUSG00000046806	3110062M04Rik|AL023049|Mri	-	6|6 B1	cell cycle regulator of NHEJ	protein-coding	no	no	145.894	yes
Usp10	NM_009462	chr8	119910360	119957559	+	3703	1	Usp10||Usp10|NM_009462|	252.68	255.29	283.7	281.61	285.01	0.0874335	0.448205	1	Mm.256910	NM_009462	ENSMUSG00000031826	2610014N07Rik|UBPO|Uchrp|mKIAA0190	-	8|8 E1	ubiquitin specific peptidase 10	protein-coding	no	no	271.658	yes
Cs	NM_026444	chr10	128337727	128362482	+	2915	1	Cs||Cs|NM_026444|	401.39	440.2	442.54	436.93	394.92	-0.0527828	0.633197	1	Mm.58836	NM_026444	ENSMUSG00000005683	2610511A05Rik|9030605P22Rik|Ahl4|BB234005|Cis	-	10|10 D3	citrate synthase	protein-coding	no	no	423.196	yes
Gm10052	NR_002885	chr15	103240432	103244584	+	1369	1	Gm10052||Gm10052|NR_002885|	64.08	68	54.17	64	58.68	-0.0168888	0.96948	1	Mm.432031	NR_002885		XM_001481145	-	9 F4|9	heterogeneous nuclear ribonucleoprotein A1 pseudogene	pseudo	no	no	61.786	yes
Ano10	NM_133979	chr9	122175874	122294423	-	2628	1	Ano10||Ano10|NM_133979|	171.68	171.79	183.63	162.99	172.31	-0.0819121	0.568441	1	Mm.87676	NM_133979	ENSMUSG00000037949	AI604832|Tmem16k	-	9|9 F4	anoctamin 10	protein-coding	no	no	172.48	yes
Pes1	NM_022889	chr11	3963975	3980004	+	2882	1	Pes1||Pes1|NM_022889|	165.63	180.14	163.43	162.14	186.28	0.0267811	0.863985	1	Mm.28659	NM_022889	ENSMUSG00000020430	-	-	11|11 A1	pescadillo ribosomal biogenesis factor 1	protein-coding	no	no	171.524	yes
Abca9	NM_147220	chr11	110100822	110168153	-	6191	1	Abca9||Abca9|NM_147220|	1574.11	1510.29	1353.33	1324.43	1375.7	-0.14635	0.199425	1	Mm.291459	NM_147220	ENSMUSG00000041797	D630040K07Rik	-	11|11 E1	ATP-binding cassette, sub-family A (ABC1), member 9	protein-coding	no	no	1427.57	yes
Rnf121	NM_001360748	chr7	102019137	102065165	-	2193	1	Rnf121||Rnf121|NM_001360748|	114.85	119.3	118.44	122.03	137.85	0.131754	0.391092	1	Mm.101141	NM_029211	ENSMUSG00000070426	4930544L10Rik	-	7|7 E2	ring finger protein 121	protein-coding	no	no	122.494	yes
Lrrc8a	NM_177725	chr2	30237769	30263790	+	4247	1	Lrrc8a||Lrrc8a|NM_177725|	724.19	611.99	750.12	663.07	784.25	0.0427958	0.713864	1	Mm.389232	NM_177725	ENSMUSG00000007476	Lrrc8|SWELL1|ebo|mKIAA1437	-	2|2 B	leucine rich repeat containing 8A VRAC subunit A	protein-coding	no	no	706.724	yes
Itpr2	NM_010586	chr6	146108299	146502223	-	11613	1	Itpr2||Itpr2|NM_010586|	1210.2	1319.42	1373.53	1048.8	1307.71	-0.156496	0.176757	1	Mm.7800	NM_010586	ENSMUSG00000030287	AI649341|InsP3R-2|InsP3R-5|Ip3r2|Itpr5|insP3R2	-	6 G3|6 77.7 cM	inositol 1,4,5-triphosphate receptor 2	protein-coding	no	no	1251.93	yes
Wdr37	NM_172445	chr13	8802966	8871044	-	4528	1	Wdr37||Wdr37|NM_172445|	446.12	418.73	473.76	441.19	440.56	-0.0309841	0.781916	1	Mm.284654	NM_172445	ENSMUSG00000021147	-	-	13|13 A1	WD repeat domain 37	protein-coding	no	no	444.072	yes
Ric8b	NM_183172	chr10	84917613	85018337	+	4943	1	Ric8b||Ric8b|NM_183172|	215.2	217.12	233.21	237.24	220.75	0.0333247	0.798151	1	Mm.18936	NM_183172	ENSMUSG00000035620	BC051080|Ric-8|Ric-8b	-	10|10 C1	RIC8 guanine nucleotide exchange factor B	protein-coding	no	no	224.704	yes
Ccl6	NM_009139	chr11	83587886	83593087	-	1429	1	Ccl6||Ccl6|NM_009139|	322.8	324.49	264.42	227	286.88	-0.254489	0.0869614	1	Mm.137	NM_009139	ENSMUSG00000018927	MRP-1|Scya6|c10	-	11 C|11 50.85 cM	chemokine (C-C motif) ligand 6	protein-coding	no	no	285.118	yes
Rnmt	NM_001361003	chr18	68300420	68324852	+	5120	1	Rnmt||Rnmt|NM_001361003|	188.6	249.33	233.21	276.49	239.37	0.194319	0.162226	1	Mm.27544	NM_026440	ENSMUSG00000009535	2610002P10Rik|AI848273|Rg7mt1|mKIAA0398	-	18|18 E2	RNA (guanine-7-) methyltransferase	protein-coding	no	no	237.4	yes
Itpkc	NM_181593	chr7	27207170	27228617	-	3225	1	Itpkc||Itpkc|NM_181593|	275.65	230.24	299.31	294.41	312.02	0.15929	0.202293	1	Mm.30963	NM_181593	ENSMUSG00000003752	9130023N17Rik|IP3K C	-	7|7 A3	inositol 1,4,5-trisphosphate 3-kinase C	protein-coding	no	no	282.326	yes
Ltbr	NM_010736	chr6	125306571	125313885	-	2088	1	Ltbr||Ltbr|NM_010736|	374.79	385.33	375.52	381.46	358.59	-0.0431147	0.68981	1	Mm.3122	NM_010736	ENSMUSG00000030339	AI256028|LTbetaR|Ltar|TNF-R-III|TNFCR|TNFR-RP|TNFR2-RP|TNFRrp|Tnfbr|Tnfrsf3	-	6 F3|6 59.32 cM	lymphotoxin B receptor	protein-coding	no	no	375.138	yes
Polr3b	NM_027423	chr10	84622298	84727178	+	4914	1	Polr3b||Polr3b|NM_027423|	166.84	190.87	198.32	157.02	192.8	-0.101024	0.514348	1	Mm.335007	NM_027423	ENSMUSG00000034453	2700078H01Rik|A330032P03Rik|C128|C85372|RPC2	-	10|10 C1	polymerase (RNA) III (DNA directed) polypeptide B	protein-coding	no	no	181.17	yes
4632415L05Rik	NR_027985	chr3	19894871	19898984	+	4113	1	4632415L05Rik||4632415L05Rik|NR_027985|	132.99	169.4	134.05	136.54	135.99	-0.100885	0.534751	1	Mm.427103	NR_027985	ENSMUSG00000048106	AI662792	-	3|3 A2	RRS1 ribosome biogenesis regulator homolog pseudogene	pseudo	no	no	141.794	yes
Zxda	NR_003292	chrX	94791285	94798289	-	7004	1	Zxda||Zxda|NR_003292|	101.56	99.02	87.22	104.11	97.8	0.0709268	0.721936	1	Mm.426134	NR_003292		4933406P09Rik|AW413531	-	X|X C3	zinc finger, X-linked, duplicated A	pseudo	no	no	97.942	yes
Ethe1	NM_001364014	chr7	24593908	24608925	+	925	1	Ethe1||Ethe1|NM_001364014|	18.13	11.93	31.22	21.33	17.7	-0.103462	0.878589	1	Mm.29553	NM_023154	ENSMUSG00000064254	0610025L15Rik|Hsco	-	7|7 A3	ethylmalonic encephalopathy 1	protein-coding	no	no	20.062	yes
Vps26c	NM_007834	chr16	94497724	94526629	-	2390	1	Vps26c||Vps26c|NM_007834|	186.19	209.96	211.17	186.04	185.35	-0.137543	0.290748	1	Mm.7472	NM_007834	ENSMUSG00000022898	AW538125|Dcra|Dscr3	-	16|16 C4	VPS26 endosomal protein sorting factor C	protein-coding	no	no	195.742	yes
Bcl2l1	NM_001289716	chr2	152780664	152830717	-	2622	1	Bcl2l1||Bcl2l1|NM_001289716|	579.11	674.03	650.04	669.04	609.15	-0.000811741	1	1	Mm.238213	NM_009743	ENSMUSG00000007659	Bcl(X)L|Bcl-XL|Bcl2l|BclX|bcl-x|bcl2-L-1	-	2 75.41 cM|2 H1	BCL2-like 1	protein-coding	no	no	636.274	yes
Prpsap2	NM_001364086	chr11	61729650	61762088	-	1937	1	Prpsap2||Prpsap2|NM_001364086|	239.38	252.91	261.67	235.53	268.25	-0.0116574	0.936811	1	Mm.27703	NM_144806	ENSMUSG00000020528	A230054F23Rik|PAP41	-	11|11 B2	phosphoribosyl pyrophosphate synthetase-associated protein 2	protein-coding	no	no	251.548	yes
Ubxn7	NM_177633	chr16	32332252	32393747	+	10297	1	Ubxn7||Ubxn7|NM_177633|	702.43	669.25	580.26	729.63	620.32	0.0410764	0.761849	1	Mm.31275	NM_177633	ENSMUSG00000053774	A630090P18|AI196514|Ubxd7|mKIAA0794	-	16|16 B3	UBX domain protein 7	protein-coding	no	no	660.378	yes
Parp6	NM_001205239	chr9	59617284	59650290	+	2667	1	Parp6||Parp6|NM_001205239|	93.09	109.75	113.85	87.04	102.46	-0.174503	0.33963	1	Mm.439943	NM_029922	ENSMUSG00000025237	1700119G14Rik|2310028P13Rik|3110038K10Rik|ARTD17|C030013N01Rik|PARP-6	-	9|9 B	poly (ADP-ribose) polymerase family, member 6	protein-coding	no	no	101.238	yes
Mapk9	NM_016961	chr11	49846751	49886421	+	4659	1	Mapk9||Mapk9|NM_016961|	351.82	376.98	352.56	355.86	300.85	-0.143513	0.231322	1	Mm.68933	NM_016961	ENSMUSG00000020366	AI851083|JNK2|Prkm9|p54aSAPK	-	11|11 B1.2-B1.3	mitogen-activated protein kinase 9	protein-coding	no	no	347.614	yes
Ctns	NM_001357891	chr11	73183596	73199042	-	2701	1	Ctns||Ctns|NM_001357891|	412.27	424.7	446.21	389.14	423.79	-0.0875745	0.413198	1	Mm.259852	NM_031251	ENSMUSG00000005949	AI195360|AW049661	-	11|11 B4	cystinosis, nephropathic	protein-coding	no	no	419.222	yes
Mtfr1	NM_001356295	chr3	19188295	19220817	+	3357	1	Mtfr1||Mtfr1|NM_001356295|	81	54.88	67.94	64.86	60.54	-0.124986	0.590045	1	Mm.45125	NM_026182	ENSMUSG00000027601	1300002C08Rik|1700080D04Rik|2810026O10Rik|4930579E05Rik|Chppr|Fam54a2	-	3|3 A2	mitochondrial fission regulator 1	protein-coding	no	no	65.844	yes
Cul4a	NM_146207	chr8	13105623	13147939	+	3686	1	Cul4a||Cul4a|NM_146207|	216.41	217.12	242.39	211.64	214.23	-0.0966787	0.457839	1	Mm.212861	NM_146207	ENSMUSG00000031446	2810470J21Rik|AW495282	-	8|8 A1.1	cullin 4A	protein-coding	no	no	220.358	yes
Abhd17a	NM_145421	chr10	80583649	80590341	-	1464	1	Abhd17a||Abhd17a|NM_145421|	187.39	208.77	201.07	227	224.47	0.170258	0.181728	1	Mm.29802	NM_145421	ENSMUSG00000003346	1700013O15Rik|BC005632|D10Bwg1364e|Fam108a	-	10 C1|10 39.72 cM	abhydrolase domain containing 17A	protein-coding	no	no	209.74	yes
Safb2	NM_001029979	chr17	56562942	56584585	-	3233	1	Safb2||Safb2|NM_001029979|	304.67	242.17	318.59	279.91	325.06	0.0517733	0.699913	1	Mm.214973	NM_001029979	ENSMUSG00000042625	AA389433|AI255170|mKIAA0138	-	17|17 D	scaffold attachment factor B2	protein-coding	no	no	294.08	yes
Iscu	NM_001363317	chr5	113772801	113778288	+	1047	1	Iscu||Iscu|NM_001363317|	122.11	116.91	156.08	97.28	118.29	-0.312224	0.0792564	1	Mm.29497	NM_025526	ENSMUSG00000025825	2310020H20Rik|AA407971|ISCU2|Nifu|Nifun	-	5|5 F	iron-sulfur cluster assembly enzyme	protein-coding	no	no	122.134	yes
Hspb3	NM_019960	chr13	113662896	113663676	-	780	1	Hspb3||Hspb3|NM_019960|	50.78	53.68	57.84	50.35	63.34	0.0514161	0.815629	1	Mm.41410	NM_019960	ENSMUSG00000051456	2310035K17Rik|AI844863|Hsbp3|spb3	-	13|13 D2.2	heat shock protein 3	protein-coding	no	no	55.198	yes
Rufy1	NM_172557	chr11	50389286	50431125	-	2653	1	Rufy1||Rufy1|NM_172557|	130.57	144.35	153.33	148.49	109.91	-0.153616	0.358137	1	Mm.390400	NM_172557	ENSMUSG00000020375	3000002E04Rik|Rabip4|ZFYVE12	-	11|11 B1.3	RUN and FYVE domain containing 1	protein-coding	no	no	137.33	yes
Tha1	NM_027919	chr11	117867949	117873526	-	1827	1	Tha1||Tha1|NM_027919|	116.06	107.37	136.8	88.75	124.81	-0.191753	0.315122	1	Mm.3200	NM_027919	ENSMUSG00000017713	1300017K07Rik|GLY1	-	11|11 E2	threonine aldolase 1	protein-coding	no	no	114.758	yes
Ptov1	NM_133949	chr7	44863067	44869668	-	1741	1	Ptov1||Ptov1|NM_133949|	314.34	300.63	315.84	267.96	306.44	-0.125382	0.290484	1	Mm.42855	NM_133949	ENSMUSG00000038502	1110030G05Rik|AU041779|Gcap3	-	7 B3|7	prostate tumor over expressed gene 1	protein-coding	no	no	301.042	yes
Sugt1	NM_026474	chr14	79587660	79630797	+	2999	1	Sugt1||Sugt1|NM_026474|	88.26	91.86	123.95	126.3	99.66	0.137909	0.460884	1	Mm.18972	NM_026474	ENSMUSG00000022024	2410174K12Rik|SGT1	-	14|14 D3	SGT1, suppressor of G2 allele of SKP1 (S. cerevisiae)	protein-coding	no	no	106.006	yes
Ddx21	NM_019553	chr10	62580247	62602298	-	4714	1	Ddx21||Ddx21|NM_019553|	454.58	380.56	435.2	401.94	466.64	0.0219979	0.851945	1	Mm.413275	NM_019553	ENSMUSG00000020075	AI255159|AL022742|D10Ertd645e|D10Wsu42e	-	10 B4|10 32.43 cM	DEAD (Asp-Glu-Ala-Asp) box polypeptide 21	protein-coding	no	no	427.784	yes
Xpa	NM_011728	chr4	46175222	46196311	-	944	1	Xpa||Xpa|NM_011728|	42.31	27.44	21.12	29.87	30.74	0.00622421	1	1	Mm.247036	NM_011728	ENSMUSG00000028329	AI573865|Xpac	-	4 B1|4 24.49 cM	xeroderma pigmentosum, complementation group A	protein-coding	no	no	30.296	yes
Rnf20	NM_001163263	chr4	49632060	49656886	+	4273	1	Rnf20||Rnf20|NM_001163263|	261.14	294.66	344.3	337.94	336.24	0.151449	0.202293	1	Mm.24765	NM_182999	ENSMUSG00000028309	4833430L21Rik|AW540162|C79397|mKIAA4116	-	4|4 B1	ring finger protein 20	protein-coding	no	no	314.856	yes
Mrpl46	NM_023331	chr7	78775341	78783089	-	1022	1	Mrpl46||Mrpl46|NM_023331|	26.6	26.25	34.89	40.96	40.05	0.442324	0.109669	1	Mm.193181	NM_023331	ENSMUSG00000030612	3110052F15Rik|C15orf4|C80107|LIECG2|P2ECSL	-	7|7 D2	mitochondrial ribosomal protein L46	protein-coding	no	no	33.75	yes
Nrde2	NM_001290303	chr12	100125450	100159653	-	3698	1	Nrde2||Nrde2|NM_001290303|	145.08	141.96	144.15	186.04	136.92	0.160759	0.339573	1	Mm.224076	NM_183155	ENSMUSG00000021179	6720454P05Rik	-	12|12 E	nrde-2 necessary for RNA interference, domain containing	protein-coding	no	no	150.83	yes
Cdk13	NM_001081058	chr13	17715962	17805097	-	7054	1	Cdk13||Cdk13|NM_001081058|	712.1	639.43	616.07	714.27	665.96	0.0614518	0.602656	1	Mm.193924	NM_027118	ENSMUSG00000041297	2310015O17Rik|Cdc2l5	-	13|13 A2	cyclin-dependent kinase 13	protein-coding	no	no	669.566	yes
Trmo	NM_001347095	chr4	46379924	46389437	-	1458	1	Trmo||Trmo|NM_001347095|	51.99	40.56	50.5	58.88	43.78	0.0971605	0.737176	1	Mm.45973	NM_029086	ENSMUSG00000028331	5830415F09Rik|AV014846|Nap1	-	4|4 B1	tRNA methyltransferase O	protein-coding	no	no	49.142	yes
5031425E22Rik	NR_040469	chr5	23431808	23434353	-	2545	1	5031425E22Rik||5031425E22Rik|NR_040469|	84.63	82.31	89.98	75.1	78.24	-0.174108	0.339397	1	Mm.425231	NR_040469	ENSMUSG00000073147	-	-	5|5 A3	RIKEN cDNA 5031425E22 gene	ncRNA	no	no	82.052	yes
Mthfsl	NM_001359992	chr9	88688605	88719587	-	737	1	Mthfsl||Mthfsl|NM_001359992|	20.55	17.89	33.97	22.19	20.49	-0.213331	0.649148	1	Mm.347377	NM_001128601	ENSMUSG00000079427	Gm2382	-	9 E3.1|9	5, 10-methenyltetrahydrofolate synthetase-like	protein-coding	no	no	23.018	yes
Cracr2a	NM_001368877	chr6	127561336	127674234	+	7576	1	Cracr2a||Cracr2a|NM_001368877|	141.45	182.52	178.12	178.35	153.68	-0.0233356	0.906915	1	Mm.296093	NM_001033464	ENSMUSG00000061414	Efcab4b|Gm1073|Gm462	-	6|6 F3	calcium release activated channel regulator 2A	protein-coding	no	no	166.824	yes
Pip4k2b	NM_054051	chr11	97715157	97744704	-	5034	1	Pip4k2b||Pip4k2b|NM_054051|	712.1	789.74	753.79	739.87	734.89	-0.040185	0.694333	1	Mm.39700	NM_054051	ENSMUSG00000018547	AI848124|PI5P4Kbeta|Pip5k2b|c11	-	11 D|11 61.07 cM	phosphatidylinositol-5-phosphate 4-kinase, type II, beta	protein-coding	no	no	746.078	yes
Ints13	NM_001362106	chr6	146549632	146577835	-	3046	1	Ints13||Ints13|NM_001362106|	118.48	108.56	112.01	108.38	144.37	0.146306	0.398811	1	Mm.271774	NM_138757	ENSMUSG00000040250	4933424B01Rik|Asun|Spata30	-	6|6 G3	integrator complex subunit 13	protein-coding	no	no	118.36	yes
Traf5	NM_011633	chr1	191997203	192092599	-	2091	1	Traf5||Traf5|NM_011633|	172.89	162.24	208.42	214.2	208.64	0.203985	0.127123	1	Mm.380491	NM_011633		-	-	1 H6|1 97.11 cM	TNF receptor-associated factor 5	protein-coding	no	no	193.278	yes
Cpsf1	NM_001164173	chr15	76595808	76607591	-	4418	1	Cpsf1||Cpsf1|NM_001164173|	307.08	324.49	376.44	413.03	364.18	0.195804	0.0936615	1	Mm.45141	NM_053193	ENSMUSG00000034022	CPSF160	-	15|15 D3	cleavage and polyadenylation specific factor 1	protein-coding	no	no	357.044	yes
Atp6v0a1	NM_001362636	chr11	101009441	101063717	+	4047	1	Atp6v0a1||Atp6v0a1|NM_001362636|	886.19	1083.21	1003.52	950.66	948.18	-0.0739564	0.499205	1	Mm.340818	NM_016920	ENSMUSG00000019302	AA959968|ATP6a1|Atp6n1|Atp6n1a|Atpv0a1|Vpp-1|Vpp1	-	11 D|11 64.04 cM	ATPase, H+ transporting, lysosomal V0 subunit A1	protein-coding	no	no	974.352	yes
Slc22a17	NM_001360406	chr14	54906731	54913132	-	2375	1	Slc22a17||Slc22a17|NM_001360406|	434.03	501.05	512.32	611.02	496.44	0.187589	0.116944	1	Mm.27435	NM_021551	ENSMUSG00000022199	1700094C23Rik|24p3R|AU041908|AW555662|BOIT|Boct	-	14|14 C2	solute carrier family 22 (organic cation transporter), member 17	protein-coding	no	no	510.972	yes
Adora3	NM_009631	chr3	105904421	105908928	+	2369	1	Adora3||Adora3|NM_009631|	605.71	595.29	583.93	588.83	559.78	-0.0623452	0.54558	1	Mm.235024	NM_009631	ENSMUSG00000000562	A3AR|A3R|AA3R|ARA3|Gpcr2	-	3 F2.2|3 46.45 cM	adenosine A3 receptor	protein-coding	no	no	586.708	yes
Shb	NM_001033306	chr4	45423276	45530828	-	2733	1	Shb||Shb|NM_001033306|	174.1	132.42	182.71	137.39	174.17	-0.0851473	0.643244	1	Mm.251716	NM_001033306	ENSMUSG00000044813	BC028832	-	4|4 B1	src homology 2 domain-containing transforming protein B	protein-coding	no	no	160.158	yes
Spindoc	NM_001033139	chr19	7356464	7383026	-	3172	1	Spindoc||Spindoc|NM_001033139|	101.56	109.75	134.05	128.86	125.74	0.124048	0.425667	1	Mm.34766	NM_001033139	ENSMUSG00000024970	1700105P06Rik|AI846148|SPIN-DOC	-	19|19 A	spindlin interactor and repressor of chromatin binding	protein-coding	no	no	119.992	yes
Frmd4a	NM_001177843	chr2	4400976	4614043	+	6713	1	Frmd4a||Frmd4a|NM_001177843|	1982.75	1754.85	1734.36	1917.53	1831.16	0.0249513	0.826526	1	Mm.37932	NM_172475	ENSMUSG00000026657	2700017I06Rik|5330420J21|AI594879|C230040M21Rik|Frmd4|Gm13190|mKIAA1294	-	2|2 A1	FERM domain containing 4A	protein-coding	no	no	1844.13	yes
Gpatch1	NM_026181	chr7	35276544	35318440	-	3018	1	Gpatch1||Gpatch1|NM_026181|	59.24	72.77	82.63	94.72	80.1	0.270613	0.168745	1	Mm.358705	NM_026181	ENSMUSG00000063808	1300003A17Rik|ECGP|Gpatc1	-	7|7 B2	G patch domain containing 1	protein-coding	no	no	77.892	yes
Blm	NM_001042527	chr7	80454993	80535119	-	4555	1	Blm||Blm|NM_001042527|	37.48	44.14	41.32	34.99	33.53	-0.266993	0.313714	1	Mm.12932	NM_007550	ENSMUSG00000030528	-	-	7 D2|7 45.65 cM	Bloom syndrome, RecQ like helicase	protein-coding	no	no	38.292	yes
Taf11	NM_026836	chr17	27901122	27909242	-	2196	1	Taf11||Taf11|NM_026836|	79.79	69.19	99.16	64	75.44	-0.271035	0.216459	1	Mm.267998	NM_026836	ENSMUSG00000024218	1110038O14Rik|AI115401|AL024207|AW552398|PRO214|TAF2I|TAFII28	-	17|17 A3.3	TATA-box binding protein associated factor 11	protein-coding	no	no	77.516	yes
Snx27	NM_029721	chr3	94497542	94582716	-	6240	1	Snx27||Snx27|NM_029721|	558.56	514.17	504.06	482.16	450.8	-0.183007	0.0984793	1	Mm.28160	NM_029721	ENSMUSG00000028136	5730552M22Rik|ESTM45|ESTM47|R75405	-	3|3 F2.1	sorting nexin family member 27	protein-coding	no	no	501.95	yes
Tead3	NM_011566	chr17	28331673	28350805	-	2589	1	Tead3||Tead3|NM_011566|	47.15	66.81	71.61	67.42	59.61	0.0197449	0.959427	1	Mm.6655	NM_011566	ENSMUSG00000002249	DTEF-1|ETFR-1|TEAD-3|TEF-5|Tcf13r2	-	17 A3.3|17 14.66 cM	TEA domain family member 3	protein-coding	no	no	62.52	yes
Dennd1c	NM_153551	chr17	57066055	57078510	-	2474	1	Dennd1c||Dennd1c|NM_153551|	427.98	594.1	561.9	500.08	527.18	-0.0522836	0.696332	1	Mm.284447	NM_153551	ENSMUSG00000002668	4432409M07Rik	-	17|17 D	DENN/MADD domain containing 1C	protein-coding	no	no	522.248	yes
Ankrd13d	NM_026720	chr19	4270180	4283137	-	2112	1	Ankrd13d||Ankrd13d|NM_026720|	91.88	94.24	124.87	113.5	108.98	0.0790569	0.646268	1	Mm.23642	NM_026720	ENSMUSG00000005986	0710001P18Rik|AI430801	-	19|19 A	ankyrin repeat domain 13 family, member D	protein-coding	no	no	106.694	yes
Mitf	NM_001113198	chr6	97807058	98021358	+	4871	1	Mitf||Mitf|NM_001113198|	307.08	292.28	338.79	343.91	342.76	0.119871	0.278757	1	Mm.333284	NM_008601	ENSMUSG00000035158	BCC2|Bhlhe32|Gsfbcc2|Vitiligo|Wh|bw|mi|vit	-	6 D3|6 45.05 cM	melanogenesis associated transcription factor	protein-coding	no	no	324.964	yes
Bms1	NM_194339	chr6	118383381	118419417	-	4243	1	Bms1||Bms1|NM_194339|	193.44	145.54	201.07	207.37	173.24	0.0663476	0.683118	1	Mm.25269	NM_194339	ENSMUSG00000030138	AA408648|AU020092|AU043373|BB007109|BC030906|Bms1l|mKIAA0187	-	6|6 F1	BMS1, ribosome biogenesis factor	protein-coding	no	no	184.132	yes
Med27	NM_026896	chr2	29346810	29524790	+	1245	1	Med27||Med27|NM_026896|	53.2	70.38	66.11	60.59	61.47	-0.06473	0.807535	1	Mm.330109	NM_026896	ENSMUSG00000026799	1500015J03Rik|2310042P07Rik|AA682045|Crsp8|D2Ertd434e	-	2 B|2 19.84 cM	mediator complex subunit 27	protein-coding	no	no	62.35	yes
Acp2	NM_001357067	chr2	91202912	91214098	+	4632	1	Acp2||Acp2|NM_001357067|	1111.07	1201.32	1090.74	1047.94	1028.28	-0.140548	0.176144	1	Mm.45570	NM_007387	ENSMUSG00000002103	Acp-2|LAP	-	2 E1|2 50.54 cM	acid phosphatase 2, lysosomal	protein-coding	no	no	1095.87	yes
Itprip	NM_001362459	chr19	47894590	47919323	-	3981	1	Itprip||Itprip|NM_001362459|	122.11	115.72	157	138.25	162.07	0.166724	0.284284	1	Mm.29457	NM_001001738	ENSMUSG00000117975	4833424O12Rik|DANGER	-	19|19 D1	inositol 1,4,5-triphosphate receptor interacting protein	protein-coding	no	no	139.03	yes
Stx17	NM_026343	chr4	48124919	48186506	+	5761	1	Stx17||Stx17|NM_026343|	275.65	294.66	244.22	265.4	267.32	-0.0355861	0.777037	1	Mm.171334	NM_026343	ENSMUSG00000061455	4833418L03Rik|6330411F21Rik|9030425C21Rik|AW048351	-	4|4 B1	syntaxin 17	protein-coding	no	no	269.45	yes
Zfp955a	NM_029952	chr17	33239507	33255145	-	3748	1	Zfp955a||Zfp955a|NM_029952|	76.17	52.49	64.27	69.12	64.27	0.0434182	0.906307	1	Mm.460572	NM_029952	ENSMUSG00000094441	AI842447|Zfp883a	-	17|17 B1	zinc finger protein 955A	protein-coding	no	no	65.264	yes
Mbtps1	NM_001167910	chr8	119508152	119558761	-	4180	1	Mbtps1||Mbtps1|NM_001167910|	482.39	475.99	469.17	480.45	431.25	-0.0723179	0.500769	1	Mm.206934	NM_019709	ENSMUSG00000031835	0610038M03Rik|AV003995|S1P|SKI-1|Ski1|mKIAA0091	-	8|8 E1	membrane-bound transcription factor peptidase, site 1	protein-coding	no	no	467.85	yes
Rnpepl1	NM_181405	chr1	92910825	92920585	+	3018	1	Rnpepl1||Rnpepl1|NM_181405|	562.18	565.47	596.79	603.33	596.11	0.0484828	0.626534	1	Mm.200971	NM_181405	ENSMUSG00000026269	1110014H17Rik|AI894167	-	1|1 D	arginyl aminopeptidase (aminopeptidase B)-like 1	protein-coding	no	no	584.776	yes
Tnf	NM_013693	chr17	35199367	35202007	-	1646	1	Tnf||Tnf|NM_013693|	656.48	601.25	470.09	686.11	680.86	0.233281	0.106755	1	Mm.1293	NM_013693	ENSMUSG00000024401	DIF|TNF-a|TNF-alpha|TNFSF2|TNFalpha|Tnfa|Tnfsf1a|Tnlg1f	-	17 B1|17 18.59 cM	tumor necrosis factor	protein-coding	no	no	618.958	yes
Wdr60	NM_146039	chr12	116207050	116263025	-	3682	1	Wdr60||Wdr60|NM_146039|	39.9	36.98	50.5	49.5	36.33	-0.00205642	1	1	Mm.31382	NM_146039	ENSMUSG00000042050	D430033N04Rik	-	12|12 F2	WD repeat domain 60	protein-coding	no	no	42.642	yes
Rps11	NM_013725	chr7	45122388	45124389	-	593	1	Rps11||Rps11|NM_013725|	79.79	73.96	79.88	75.1	70.79	-0.104888	0.581251	1	Mm.196538	NM_013725	ENSMUSG00000003429	-	-	7|7 B3	ribosomal protein S11	protein-coding	no	no	75.904	yes
Wdr6	NM_031392	chr9	108572311	108578713	-	4126	1	Wdr6||Wdr6|NM_031392|	258.73	242.17	258.91	244.06	274.77	0.0207002	0.887963	1	Mm.335454	NM_031392	ENSMUSG00000066357	-	-	9|9 F2	WD repeat domain 6	protein-coding	no	no	255.728	yes
Chil3	NM_009892	chr3	106147554	106167564	-	1518	1	Chil3||Chil3|NM_009892|	45.94	31.02	25.71	19.63	29.81	-0.473868	0.188613	1	Mm.387173	NM_009892	ENSMUSG00000040809	AI505981|Chi3l3|ECF-L|Ym1	-	3 F2.2|3 46.49 cM	chitinase-like 3	protein-coding	no	no	30.422	yes
Gadd45gip1	NM_183358	chr8	84832282	84835482	+	1731	1	Gadd45gip1||Gadd45gip1|NM_183358|	70.12	71.58	76.21	61.44	76.38	-0.0937314	0.678184	1	Mm.489649	NM_183358	ENSMUSG00000033751	2310040G17Rik|AI425883|Crif1|MRP-L59|Plinp1	-	8|8 C2	growth arrest and DNA-damage-inducible, gamma interacting protein 1	protein-coding	no	no	71.146	yes
2310011J03Rik	NM_025521	chr10	80318255	80320548	-	1656	1	2310011J03Rik||2310011J03Rik|NM_025521|	135.41	109.75	162.51	122.89	138.78	-0.0765881	0.700709	1	Mm.383824	NM_025521	ENSMUSG00000020133	AI452186|AW545358	-	10|10 C1	RIKEN cDNA 2310011J03 gene	protein-coding	no	no	133.868	yes
Serpine1	NM_008871	chr5	137061506	137072272	-	3005	1	Serpine1||Serpine1|NM_008871|	819.7	557.11	719.82	610.16	753.51	-0.0510463	0.748124	1	Mm.250422	NM_008871	ENSMUSG00000037411	PAI-1|PAI1|Planh1	-	5|5 G2	serine (or cysteine) peptidase inhibitor, clade E, member 1	protein-coding	no	no	692.06	yes
Mul1	NM_026689	chr4	138434672	138442265	+	3725	1	Mul1||Mul1|NM_026689|	252.68	211.15	251.57	235.53	247.76	0.00459372	0.974211	1	Mm.103413	NM_026689	ENSMUSG00000041241	0610009K11Rik|AV000801|Gide	-	4|4 D3	mitochondrial ubiquitin ligase activator of NFKB 1	protein-coding	no	no	239.738	yes
Nup85	NM_001002929	chr11	115564444	115583924	+	2122	1	Nup85||Nup85|NM_001002929|	72.54	82.31	108.34	89.6	92.21	0.0262978	0.876475	1	Mm.4379	NM_001002929	ENSMUSG00000020739	Pcnt1|frount	-	11|11 E2	nucleoporin 85	protein-coding	no	no	89	yes
Ccnk	NM_009832	chr12	108179738	108203359	+	2609	1	Ccnk||Ccnk|NM_009832|	290.16	307.79	349.81	320.87	316.68	-0.00248188	1	1	Mm.474441	NM_009832	ENSMUSG00000021258	AW123198|AW413594|CPR4|CycK	-	12 F1|12 59.23 cM	cyclin K	protein-coding	no	no	317.062	yes
Ghitm	NM_001199122	chr14	37120445	37135139	-	2935	1	Ghitm||Ghitm|NM_001199122|	402.6	403.22	414.08	386.58	389.33	-0.0799921	0.446632	1	Mm.182912	NM_078478	ENSMUSG00000041028	1010001P14Rik|C77840|MICS1|PTD010|Tmbim5	-	14 B|14 21.29 cM	growth hormone inducible transmembrane protein	protein-coding	no	no	399.162	yes
Dync1li1	NM_146229	chr9	114688831	114723777	+	2010	1	Dync1li1||Dync1li1|NM_146229|	191.02	164.63	179.95	164.7	163	-0.134652	0.336852	1	Mm.128627	NM_146229	ENSMUSG00000032435	1110053F02Rik|Dnclic1|LIC-1	-	9|9 F3	dynein cytoplasmic 1 light intermediate chain 1	protein-coding	no	no	172.66	yes
Rtl5	NM_001278534	chrX	102066542	102071307	-	4327	1	Rtl5||Rtl5|NM_001278534|	32.64	47.72	58.76	56.32	48.43	0.151253	0.582693	1	Mm.23297	NM_183318	ENSMUSG00000049191	6430402L03Rik|Mar5|Mart5|Rgag4|mKIAA2001	-	X|X D	retrotransposon Gag like 5	protein-coding	no	no	48.774	yes
Mrpl30	NM_027098	chr1	37890477	37898338	+	761	1	Mrpl30||Mrpl30|NM_027098|	31.43	35.79	28.46	28.16	36.33	0.00904661	1	1	Mm.26614	NM_027098	ENSMUSG00000026087	2310001L22Rik|L30mt|MRP-L28|MRP-L30|Rpml28	-	1|1 B	mitochondrial ribosomal protein L30	protein-coding	no	no	32.034	yes
Ndufa9	NM_025358	chr6	126821863	126849144	-	1301	1	Ndufa9||Ndufa9|NM_025358|	96.72	124.07	117.52	111.79	102.46	-0.0855272	0.628767	1	Mm.29939	NM_025358	ENSMUSG00000000399	1010001N11Rik	-	6|6 F3	NADH:ubiquinone oxidoreductase subunit A9	protein-coding	no	no	110.512	yes
Rrbp1	NM_024281	chr2	143947395	144011263	-	5130	1	Rrbp1||Rrbp1|NM_024281|	1291.21	1363.56	1326.7	1265.55	1310.5	-0.0561537	0.569671	1	Mm.13705	NM_024281	ENSMUSG00000027422	1700087N07Rik|5730465C04Rik|ES/130|mKIAA1398|mRRp0|mRRp1.8|mRRp10|mRRp15a|mRRp15b|mRRp16.8|mRRp2|mRRp41|mRRp47|mRRp5.4|p180	-	2|2 G1	ribosome binding protein 1	protein-coding	no	no	1311.5	yes
Rps4l	NR_003634	chr6	148354656	148355596	+	940	1	Rps4l||Rps4l|NR_003634|	94.3	77.54	106.5	93.02	98.73	0.0260883	0.875682	1	Mm.391542	NM_025405	ENSMUSG00000063171	1110033J19Rik|AA407494|Rps4y2	-	6|6 G3	ribosomal protein S4-like	pseudo	no	no	94.018	yes
Shtn1	NM_001114312	chr19	58973358	59076069	-	4048	1	Shtn1||Shtn1|NM_001114312|	19.34	15.51	16.53	29.87	21.42	0.579881	0.103294	1	Mm.37338	NM_175172	ENSMUSG00000041362	4930506M07Rik|Shootin1|mKIAA1598	-	19|19 D2-D3	shootin 1	protein-coding	no	no	20.534	yes
Txlng	NM_178935	chrX	162778917	162829454	-	3845	1	Txlng||Txlng|NM_178935|	70.12	79.93	100.08	87.04	98.73	0.130281	0.475773	1	Mm.270186	NM_178935	ENSMUSG00000038344	4932441K18Rik|Fiat|Lrp	-	X|X F4	taxilin gamma	protein-coding	no	no	87.18	yes
Erc1	NR_104484	chr6	119570796	119848150	-	8654	1	Erc1||Erc1|NR_104484|	55.61	32.21	45.91	37.55	42.85	-0.16353	0.590088	1	Mm.288860	NM_053204	ENSMUSG00000030172	4930404L01Rik|5033405M01Rik|9630025C19Rik|B430107L16Rik|CAST2|ELKS|Elks1|RAB6IP2A|RAB6IP2B|Rab6ip2|mKIAA1081	-	6|6 F1	ELKS/RAB6-interacting/CAST family member 1	protein-coding	no	no	42.826	yes
Bbx	NM_001347240	chr16	50191844	50432466	-	8840	1	Bbx||Bbx|NM_001347240|	349.4	300.63	318.59	338.79	302.71	-0.0196437	0.879508	1	Mm.28940	NM_027444	ENSMUSG00000022641	5530401J07Rik|5730403O13Rik	-	16|16 B5	bobby sox HMG box containing	protein-coding	no	no	322.024	yes
Snhg3	NR_003270	chr4	132351933	132353686	-	432	1	Snhg3||Snhg3|NR_003270|	25.39	34.6	43.15	23.04	27.94	-0.461087	0.176881	1	Mm.486919	NR_002904	ENSMUSG00000085241	Rnu17d|U17HG	-	4|4 D2.3	small nucleolar RNA host gene 3	ncRNA	no	no	30.824	yes
Ift52	NM_001356522	chr2	163017353	163046139	+	2345	1	Ift52||Ift52|NM_001356522|	93.09	136	110.18	109.23	95	-0.154305	0.419377	1	Mm.34034	NM_172150	ENSMUSG00000017858	BC037708|NGD5	-	2|2 H2	intraflagellar transport 52	protein-coding	no	no	108.7	yes
Fam160b1	NM_145505	chr19	57361009	57389594	+	5597	1	Fam160b1||Fam160b1|NM_145505|	414.69	460.48	461.82	528.24	470.36	0.152519	0.158683	1	Mm.358870	NM_145505	ENSMUSG00000033478	AI450540|mKIAA1600	-	19|19 D2	family with sequence similarity 160, member B1	protein-coding	no	no	467.118	yes
Tmem209	NM_001311093	chr6	30481233	30509783	-	3491	1	Tmem209||Tmem209|NM_001311093|	207.95	189.68	181.79	238.94	215.16	0.226637	0.103447	1	Mm.45418	NM_178625	ENSMUSG00000029782	2700094F01Rik|AI428435	-	6|6 A3.3	transmembrane protein 209	protein-coding	no	no	206.704	yes
Mtif3	NM_001256100	chr5	146951573	146963797	-	5090	1	Mtif3||Mtif3|NM_001256100|	131.78	106.17	131.29	103.26	116.43	-0.18081	0.272121	1	Mm.486234	NM_029581	ENSMUSG00000016510	2810012L14Rik|AI414549	-	5|5 G3	mitochondrial translational initiation factor 3	protein-coding	no	no	117.786	yes
Safb	NM_001163300	chr17	56584982	56606294	+	3142	1	Safb||Safb|NM_001163300|	192.23	165.82	246.06	212.49	216.09	0.0702642	0.630938	1	Mm.255066	NM_001163300	ENSMUSG00000071054	3110021E02Rik|5330423C17Rik|AU018122|D18386|E130307D12|HAP|HET|SAF-B1|SAFB1	-	17|17 D	scaffold attachment factor B	protein-coding	no	no	206.538	yes
Flot2	NM_001284228	chr11	78037931	78060434	+	2757	1	Flot2||Flot2|NM_001284228|	139.03	180.14	137.72	151.9	140.64	-0.0636194	0.695383	1	Mm.130227	NM_008028	ENSMUSG00000061981	AI573412|Esa|reggie-2	-	11 B5|11 46.74 cM	flotillin 2	protein-coding	no	no	149.886	yes
Ctnnbip1	NM_023465	chr4	149518241	149566437	+	2660	1	Ctnnbip1||Ctnnbip1|NM_023465|	149.92	151.51	199.24	223.58	161.13	0.190882	0.260877	1	Mm.299735	NM_023465	ENSMUSG00000028988	1110008O09Rik|2310001I19Rik|AW457332|Catnbip1|Icat	-	4|4 E2	catenin beta interacting protein 1	protein-coding	no	no	177.076	yes
Arhgap25	NM_001037727	chr6	87458545	87533259	-	3674	1	Arhgap25||Arhgap25|NM_001037727|	631.1	554.73	637.19	610.16	639.88	0.0268815	0.801076	1	Mm.119564	NM_175476	ENSMUSG00000030047	A130039I20Rik	-	6|6 D1	Rho GTPase activating protein 25	protein-coding	no	no	614.612	yes
Srek1	NM_172592	chr13	103741613	103764582	-	4046	1	Srek1||Srek1|NM_172592|	415.89	486.73	419.59	408.77	419.14	-0.101237	0.376739	1	Mm.458176	NM_172592	ENSMUSG00000032621	8430401B01|AI450757|AI462342|SRrp508|SRrp86|Sfrs12|Srsf12	-	13|13 D1	splicing regulatory glutamine/lysine-rich protein 1	protein-coding	no	no	430.024	yes
Zfp354a	NM_001347495	chr11	51059257	51072799	+	4309	1	Zfp354a||Zfp354a|NM_001347495|	45.94	34.6	44.07	29.87	33.53	-0.405454	0.15719	1	Mm.4792	NM_009329	ENSMUSG00000020364	AW488485|Tcf17|Znf354a|kid1	-	11 B1.3|11 30.97 cM	zinc finger protein 354A	protein-coding	no	no	37.602	yes
Chmp3	NM_025783	chr6	71543852	71581579	+	2588	1	Chmp3||Chmp3|NM_025783|	333.68	396.06	400.31	359.27	381.88	-0.0376956	0.757374	1	Mm.181278	NM_025783	ENSMUSG00000053119	25.1|4921505F14Rik|9130011K15Rik|CGI-49|D6Ertd286e|NEDF|Vps24	-	6 C1|6 32.17 cM	charged multivesicular body protein 3	protein-coding	no	no	374.24	yes
Ephx1	NM_001312918	chr1	180989556	181017569	-	1680	1	Ephx1||Ephx1|NM_001312918|	88.26	72.77	100.99	43.52	81.96	-0.500831	0.0597293	1	Mm.9075	NM_010145	ENSMUSG00000038776	EH|Eph-1|Eph1|Epxh1|mEH	-	1 H4|1 84.48 cM	epoxide hydrolase 1, microsomal	protein-coding	no	no	77.5	yes
Cd80	NM_001359898	chr16	38458933	38495958	+	2677	1	Cd80||Cd80|NM_001359898|	122.11	140.77	135.88	188.6	140.64	0.300246	0.0683602	1	Mm.89474	NM_009855	ENSMUSG00000075122	B71|Cd28l|Ly-53|Ly53|MIC17|TSA1	-	16 B4|16 26.86 cM	CD80 antigen	protein-coding	no	no	145.6	yes
Aldh5a1	NM_172532	chr13	24907579	24937661	-	5628	1	Aldh5a1||Aldh5a1|NM_172532|	39.9	42.95	37.64	52.91	45.64	0.292427	0.250161	1	Mm.393311	NM_172532	ENSMUSG00000035936	6330403E24Rik|Ahd-1|Ahd1|D630032B01Rik|SSADH|Ssdh1	-	13 A3.1|13 10.77 cM	aldhehyde dehydrogenase family 5, subfamily A1	protein-coding	no	no	43.808	yes
Ccdc17	NM_001037916	chr4	116596730	116600266	+	1978	1	Ccdc17||Ccdc17|NM_001037916|	36.27	40.56	58.76	29.87	35.39	-0.499844	0.0964465	1	Mm.388905	NM_001037916	ENSMUSG00000034035	1100001F07Rik	-	4|4 D1	coiled-coil domain containing 17	protein-coding	no	no	40.17	yes
Trim24	NM_145076	chr6	37870811	37968445	+	6154	1	Trim24||Trim24|NM_145076|	245.43	251.72	238.72	255.16	259.86	0.0604638	0.644469	1	Mm.41063	NM_145076	ENSMUSG00000029833	A130082H20Rik|AI447469|D430004I05Rik|TIF1|TIF1-alpha|TIF1alpha|Tif1a	-	6|6 B1	tripartite motif-containing 24	protein-coding	no	no	250.178	yes
E030024N20Rik	NR_033228	chr19	16164098	16170458	+	6360	1	E030024N20Rik||E030024N20Rik|NR_033228|	14.51	53.68	50.5	38.4	29.81	-0.226079	0.624465	1	Mm.405662	NR_033228		9030417F11Rik|Ppia-ps8	-	19|19 A	peptidylprolyl isomerase A pseudogene 8	pseudo	no	no	37.38	yes
Copb1	NM_033370	chr7	114215559	114254680	-	3272	1	Copb1||Copb1|NM_033370|	367.53	362.66	369.09	392.55	396.78	0.0953372	0.371202	1	Mm.277024	NM_033370	ENSMUSG00000030754	2610019B04Rik	-	7 F1|7 59.31 cM	coatomer protein complex, subunit beta 1	protein-coding	no	no	377.722	yes
Rbck1	NM_001083921	chr2	152316334	152332425	-	2374	1	Rbck1||Rbck1|NM_001083921|	372.37	409.19	422.34	347.32	415.41	-0.0885439	0.464705	1	Mm.182145	NM_019705	ENSMUSG00000027466	AL033326|HOIL-1|HOIL-1L|UIP28|Ubce7ip3	-	2|2 G3	RanBP-type and C3HC4-type zinc finger containing 1	protein-coding	no	no	393.326	yes
Nosip	NM_025533	chr7	45062429	45078503	+	2117	1	Nosip||Nosip|NM_025533|	166.84	165.82	215.76	222.73	182.56	0.132611	0.366511	1	Mm.272139	NM_025533	ENSMUSG00000003421	2310061K06Rik|CGI-25	-	7|7 B3	nitric oxide synthase interacting protein	protein-coding	no	no	190.742	yes
Ube2m	NM_001168469	chr7	13035120	13038275	-	1215	1	Ube2m||Ube2m|NM_001168469|	140.24	169.4	190.05	183.48	187.21	0.13532	0.334934	1	Mm.196580	NM_145578	ENSMUSG00000005575	2510040H03Rik|UBC12|Ubc-rs2	-	7 A1|7 7.73 cM	ubiquitin-conjugating enzyme E2M	protein-coding	no	no	174.076	yes
Zfp821	NM_001286391	chr8	109705546	109724932	+	2132	1	Zfp821||Zfp821|NM_001286391|	45.94	38.17	65.19	64.86	59.61	0.293713	0.22017	1	Mm.180410	NM_029468	ENSMUSG00000031728	4930566A11Rik|Znf821	-	8|8 D3	zinc finger protein 821	protein-coding	no	no	54.754	yes
Trmt112	NM_001166370	chr19	6909698	6911026	+	1025	1	Trmt112||Trmt112|NM_001166370|	39.9	31.02	60.6	24.75	51.23	-0.237402	0.530318	1	Mm.318804	NM_026306	ENSMUSG00000038812	0610038D11Rik|Trm112p	-	19|19 A	tRNA methyltransferase 11-2	protein-coding	no	no	41.5	yes
Ppp1r15a	NM_008654	chr7	45522917	45526268	-	2328	1	Ppp1r15a||Ppp1r15a|NM_008654|	1088.1	774.23	849.27	878.12	981.71	0.0251661	0.863963	1	Mm.4048	NM_008654	ENSMUSG00000040435	9630030H21|Gadd34|Myd116	-	7|7 B3	protein phosphatase 1, regulatory subunit 15A	protein-coding	no	no	914.286	yes
Arpp19	NM_001142655	chr9	75037614	75060313	+	3956	1	Arpp19||Arpp19|NM_001142655|	164.42	165.82	156.08	229.56	163.93	0.272881	0.100684	1	Mm.247837	NM_021548	ENSMUSG00000007656	19kDa|2700024H10Rik|ARPP-19|AW559096|Arpp12	-	9|9 D	cAMP-regulated phosphoprotein 19	protein-coding	no	no	175.962	yes
Lrif1	NM_001286685	chr3	106721682	106736576	+	3620	1	Lrif1||Lrif1|NM_001286685|	275.65	320.91	288.29	287.59	244.96	-0.15604	0.223028	1	Mm.259638	NM_028081	ENSMUSG00000056260	2010012G17Rik|4933421E11Rik|AI450568	-	3|3 F2.3	ligand dependent nuclear receptor interacting factor 1	protein-coding	no	no	283.48	yes
Zbed5	NM_001359408	chr5	129895723	129903622	+	2573	1	Zbed5||Zbed5|NM_001359408|	29.02	44.14	37.64	20.48	33.53	-0.470729	0.15701	1	Mm.422716	NM_183088	ENSMUSG00000034173	2410018M08Rik|Scand3	-	5|5 G1.3	zinc finger, BED type containing 5	protein-coding	no	no	32.962	yes
Ubr7	NM_025666	chr12	102757975	102777701	+	3226	1	Ubr7||Ubr7|NM_025666|	158.38	168.21	168.94	144.22	162.07	-0.123035	0.38741	1	Mm.34261	NM_025666	ENSMUSG00000041712	5730410I19Rik|AA589405|AW557761	-	12|12 E	ubiquitin protein ligase E3 component n-recognin 7 (putative)	protein-coding	no	no	160.364	yes
Ttc33	NM_001355620	chr15	5185490	5218332	+	1693	1	Ttc33||Ttc33|NM_001355620|	84.63	84.7	75.29	63.15	76.38	-0.233596	0.256013	1	Mm.254979	NM_026213	ENSMUSG00000022151	2410099M07Rik|2900001O04Rik|AI507072|AW538342|Osrf	-	15|15 A1	tetratricopeptide repeat domain 33	protein-coding	no	no	76.83	yes
Mrm1	NM_145433	chr11	84813061	84819515	-	2468	1	Mrm1||Mrm1|NM_145433|	77.38	75.16	94.57	73.39	81.03	-0.115632	0.594026	1	Mm.280825	NM_145433	ENSMUSG00000018405	A530065E19Rik	-	11|11 C	mitochondrial rRNA methyltransferase 1	protein-coding	no	no	80.306	yes
Coq9	NM_026452	chr8	94838413	94854895	+	1680	1	Coq9||Coq9|NM_026452|	91.88	102.6	120.28	109.23	112.7	0.0596233	0.691588	1	Mm.169234	NM_026452	ENSMUSG00000031782	2310005O14Rik|C78387	-	8|8 C5	coenzyme Q9	protein-coding	no	no	107.338	yes
Ndufa6	NM_025987	chr15	82350139	82354291	-	555	1	Ndufa6||Ndufa6|NM_025987|	37.48	45.33	41.32	37.55	36.33	-0.172184	0.50632	1	Mm.27570	NM_025987	ENSMUSG00000022450	14kDa|2700038D15Rik|B230217P19Rik	-	15|15 E1	NADH:ubiquinone oxidoreductase subunit A6	protein-coding	no	no	39.602	yes
Trim30a	NM_001357467	chr7	104409026	104446125	-	3793	1	Trim30a||Trim30a|NM_001357467|	574.27	578.59	595.87	565.79	518.8	-0.115771	0.259901	1	Mm.295578	NM_009099	ENSMUSG00000030921	Rpt-1|Rpt1|Trim30	-	7 E3|7 55.69 cM	tripartite motif-containing 30A	protein-coding	no	no	566.664	yes
Edn1	NM_010104	chr13	42301476	42307990	+	2130	1	Edn1||Edn1|NM_010104|	60.45	38.17	34.89	31.57	30.74	-0.513566	0.102648	1	Mm.14543	NM_010104	ENSMUSG00000021367	ET-1|PPET1|preproET	-	13 A4|13 20.82 cM	endothelin 1	protein-coding	no	no	39.164	yes
Nf2	NM_001252250	chr11	4765845	4849544	-	4740	1	Nf2||Nf2|NM_001252250|	473.93	527.29	549.04	439.49	502.03	-0.148964	0.1778	1	Mm.297109	NM_010898	ENSMUSG00000009073	merlin	-	11 A1|11 3.0 cM	neurofibromin 2	protein-coding	no	no	498.356	yes
Zfp286	NM_001364098	chr11	62778387	62789468	-	3231	1	Zfp286||Zfp286|NM_001364098|	33.85	41.75	46.82	44.38	40.05	0.0291737	0.947716	1	Mm.168530	NM_138949	ENSMUSG00000047342	BC027023	-	11|11 B2	zinc finger protein 286	protein-coding	no	no	41.37	yes
Abhd17c	NM_133722	chr7	84109356	84151893	-	2233	1	Abhd17c||Abhd17c|NM_133722|	435.24	466.45	441.62	401.94	428.45	-0.120877	0.256486	1	Mm.23914	NM_133722	ENSMUSG00000038459	2210412D01Rik|AL023007|Fam108c|Fam108c1	-	7|7 D3	abhydrolase domain containing 17C	protein-coding	no	no	434.74	yes
Cntn2	NM_177129	chr1	132509425	132542940	-	9490	1	Cntn2||Cntn2|NM_177129|	4.84	39.37	28.46	29.87	54.95	0.788909	0.104994	1	Mm.260861	NM_011531	ENSMUSG00000053024	D130012K04Rik|TAG-1|TAG1|Tax	-	1|1 E4	contactin 2	protein-coding	no	no	31.498	yes
Lrrc39	NM_175413	chr3	116562973	116583134	+	3075	1	Lrrc39||Lrrc39|NM_175413|	53.2	73.96	78.04	63.15	75.44	-0.00345265	1	1	Mm.216027	NM_027321	ENSMUSG00000027961	2010005E21Rik|9430028I06Rik|Myomasp	-	3|3 G1	leucine rich repeat containing 39	protein-coding	no	no	68.758	yes
Flot1	NM_008027	chr17	35823357	35832787	+	1669	1	Flot1||Flot1|NM_008027|	170.47	171.79	184.55	164.7	174.17	-0.0662406	0.636889	1	Mm.2931	NM_008027	ENSMUSG00000059714	reggie-2	-	17|17 B1	flotillin 1	protein-coding	no	no	173.136	yes
Exosc1	NM_025644	chr19	41922980	41933314	-	1607	1	Exosc1||Exosc1|NM_025644|	33.85	59.65	69.78	60.59	58.68	0.108095	0.646957	1	Mm.289086	NM_025644	ENSMUSG00000034321	2610035C18Rik|2610104C07Rik|2610312F07Rik|AI447561	-	19|19 C3	exosome component 1	protein-coding	no	no	56.51	yes
Pde4dip	NR_110360	chr3	97738844	97768014	-	6681	1	Pde4dip||Pde4dip|NR_110360|	609.33	542.8	473.76	570.91	523.46	0.00192895	1	1	Mm.129840	NM_031401	ENSMUSG00000038170	4732458A06Rik|9430063L05Rik|C87016|D130016K21Rik|D3Bwg1078e|Usmg4|mKIAA0454	-	3 F2.2|3 42.28 cM	phosphodiesterase 4D interacting protein (myomegalin)	protein-coding	no	no	544.052	yes
Nudt19	NM_033080	chr7	35547185	35555928	-	1917	1	Nudt19||Nudt19|NM_033080|	61.66	53.68	68.86	51.2	48.43	-0.31863	0.171393	1	Mm.410206	NM_033080	ENSMUSG00000034875	D7Rp2|D7Rp2-r|D7Rp2-s|D7Rp2e|RP2-r|RP2-s	-	7 B2|7 21.37 cM	nudix (nucleoside diphosphate linked moiety X)-type motif 19	protein-coding	no	no	56.766	yes
Poldip3	NM_178627	chr15	83125968	83149378	-	3284	1	Poldip3||Poldip3|NM_178627|	576.69	565.47	585.77	558.11	553.26	-0.064026	0.525668	1	Mm.23758	NM_178627	ENSMUSG00000041815	1110008P04Rik|AA408269|AL022852|C77954|PDIP46|SKAR|mKIAA1649	-	15|15 E1	polymerase (DNA-directed), delta interacting protein 3	protein-coding	no	no	567.86	yes
Ube2l3	NM_009456	chr16	17152015	17201492	-	2602	1	Ube2l3||Ube2l3|NM_009456|	363.91	400.84	413.16	370.36	384.67	-0.0703547	0.532114	1	Mm.3074	NM_009456	ENSMUSG00000038965	C79827|UbcM4|Ubce7	-	16 A3|16 10.63 cM	ubiquitin-conjugating enzyme E2L 3	protein-coding	no	no	386.588	yes
Arhgap4	NM_001162423	chrX	73894352	73911298	-	3245	1	Arhgap4||Arhgap4|NM_001162423|	695.17	718.17	721.65	679.28	713.46	-0.0441729	0.660926	1	Mm.482337	NM_138630	ENSMUSG00000031389	A130009C12Rik|A530015A20Rik|Rgc1|c1|mKIAA0131	-	X|X A7.3	Rho GTPase activating protein 4	protein-coding	no	no	705.546	yes
Hsf2	NM_008297	chr10	57486385	57513143	+	2600	1	Hsf2||Hsf2|NM_008297|	93.09	113.33	105.59	116.06	105.25	0.0799082	0.659137	1	Mm.261395	NM_008297	ENSMUSG00000019878	AI661205	-	10|10 B4	heat shock factor 2	protein-coding	no	no	106.664	yes
Api5	NM_001305258	chr2	94411727	94438186	-	3719	1	Api5||Api5|NM_001305258|	429.19	382.94	399.39	359.27	388.4	-0.123902	0.276487	1	Mm.181824	NM_007466	ENSMUSG00000027193	AAC-11|AI196452|API-5	-	2|2 E1	apoptosis inhibitor 5	protein-coding	no	no	391.838	yes
Nek6	NM_021606	chr2	38511697	38587490	+	3149	1	Nek6||Nek6|NM_021606|	531.96	579.78	544.45	501.78	498.31	-0.154167	0.136436	1	Mm.143818	NM_021606	ENSMUSG00000026749	1300007C09Rik	-	2 B|2 24.41 cM	NIMA (never in mitosis gene a)-related expressed kinase 6	protein-coding	no	no	531.256	yes
Rnaseh2a	NM_027187	chr8	84956610	84966076	-	2094	1	Rnaseh2a||Rnaseh2a|NM_027187|	35.06	41.75	46.82	43.52	46.57	0.105639	0.667401	1	Mm.182470	NM_027187	ENSMUSG00000052926	2400006P09Rik|RNASEHI|RNHIA|RNHL	-	8|8 C3	ribonuclease H2, large subunit	protein-coding	no	no	42.744	yes
Epb41l2	NM_013511	chr10	25408368	25523518	+	4240	1	Epb41l2||Epb41l2|NM_013511|	2092.77	2000.6	1708.65	1741.73	1803.22	-0.141445	0.250337	1	Mm.306026	NM_013511	ENSMUSG00000019978	4.1G|AW555191|D10Ertd398e|Epb4.1l2|NBL2	-	10 A4|10 12.26 cM	erythrocyte membrane protein band 4.1 like 2	protein-coding	no	no	1869.39	yes
Wdr45	NM_001290792	chrX	7722220	7728201	+	1580	1	Wdr45||Wdr45|NM_001290792|	79.79	90.67	95.49	94.72	89.42	0.0397661	0.841267	1	Mm.305725	NM_172372	ENSMUSG00000039382	C79260|DXImx38e|JM5|Sfc19|WIPI-4|Wdrx1	-	X A1.1|X 3.48 cM	WD repeat domain 45	protein-coding	no	no	90.018	yes
Tfrc	NM_001357298	chr16	32609122	32632794	+	4971	1	Tfrc||Tfrc|NM_001357298|	119.69	106.17	122.11	122.89	163.93	0.287942	0.0830131	1	Mm.28683	NM_011638	ENSMUSG00000022797	2610028K12Rik|CD71|E430033M20Rik|Mtvr1|TFR|TFR1|TR|Trfr|p90	-	16 B3|16 23.06 cM	transferrin receptor	protein-coding	no	no	126.958	yes
Adcy8	NM_009623	chr15	64699035	64922296	-	5004	1	Adcy8||Adcy8|NM_009623|	118.48	91.86	90.9	61.44	89.42	-0.42588	0.0515552	1	Mm.1425	NM_009623	ENSMUSG00000022376	AC8|AW060868	-	15 D1|15 29.03 cM	adenylate cyclase 8	protein-coding	no	no	90.42	yes
Nap1l4	NM_001285489	chr7	143513579	143549120	-	2248	1	Nap1l4||Nap1l4|NM_001285489|	305.88	312.56	302.07	254.31	285.94	-0.196052	0.0970973	1	Mm.294625	NM_008672	ENSMUSG00000059119	2810410H14Rik|AI316776|D7Wsu30e|Nap2	-	7 F5|7 88.24 cM	nucleosome assembly protein 1-like 4	protein-coding	no	no	292.152	yes
Arhgap22	NM_153800	chr14	33216823	33369936	+	2577	1	Arhgap22||Arhgap22|NM_153800|	565.81	540.41	578.42	588.83	544.88	0.00157327	0.996866	1	Mm.318350	NM_153800	ENSMUSG00000063506	B230341L19Rik|RHOGAP2|p68RacGAP	-	14|14 B	Rho GTPase activating protein 22	protein-coding	no	no	563.67	yes
Tspan5	NR_121195	chr3	138742208	138904433	+	3089	1	Tspan5||Tspan5|NR_121195|	94.3	94.24	115.68	81.92	98.73	-0.18968	0.316688	1	Mm.31927	NM_019571	ENSMUSG00000028152	2810455A09Rik|4930505M03Rik|NET-4|Tm4sf9	-	3|3 H1	tetraspanin 5	protein-coding	no	no	96.974	yes
Cdk4	NM_009870	chr10	127063535	127067288	+	1405	1	Cdk4||Cdk4|NM_009870|	155.96	146.73	189.14	160.43	182.56	0.0440003	0.736105	1	Mm.6839	NM_009870	ENSMUSG00000006728	Crk3	-	10|10 D3	cyclin-dependent kinase 4	protein-coding	no	no	166.964	yes
Mettl21a	NM_025964	chr1	64606473	64617764	-	3264	1	Mettl21a||Mettl21a|NM_025964|	103.97	100.21	123.95	98.99	108.04	-0.100512	0.57714	1	Mm.46394	NM_025964	ENSMUSG00000025956	2310038H17Rik|AI464204|Fam119a	-	1|1 C2	methyltransferase like 21A	protein-coding	no	no	107.032	yes
Batf3	NM_030060	chr1	191098414	191108943	+	707	1	Batf3||Batf3|NM_030060|	78.58	88.28	97.32	93.02	84.76	-0.0026046	1	1	Mm.6922	NM_030060	ENSMUSG00000026630	9130211I03Rik|Snft	-	1|1 H6	basic leucine zipper transcription factor, ATF-like 3	protein-coding	no	no	88.392	yes
Megf8	NM_001160400	chr7	25317164	25365917	+	9959	1	Megf8||Megf8|NM_001160400|	536.79	510.59	560.98	532.5	527.18	-0.0300183	0.777997	1	Mm.38527	NM_001160400	ENSMUSG00000045039	AW049492|Egfl4|b2b1702.2Clo|b2b1702Clo|b2b288Clo|m687Ddg|mKIAA0817	-	7|7 A3	multiple EGF-like-domains 8	protein-coding	no	no	533.608	yes
Junb	NM_008416	chr8	84976909	84978748	-	1839	1	Junb||Junb|NM_008416|	1782.06	1623.63	1335.89	1281.77	1413.89	-0.246532	0.0763311	1	Mm.1167	NM_008416	ENSMUSG00000052837	-	-	8 C3|8 41.41 cM	jun B proto-oncogene	protein-coding	no	no	1487.45	yes
Srpk1	NM_016795	chr17	28589588	28622521	-	2494	1	Srpk1||Srpk1|NM_016795|	191.02	178.94	184.55	180.06	190.94	-0.00623233	0.983511	1	Mm.15252	NM_016795	ENSMUSG00000004865	AU017960	-	17|17 A3.3	serine/arginine-rich protein specific kinase 1	protein-coding	no	no	185.102	yes
Lamtor4	NM_001081108	chr5	138255482	138259395	+	870	1	Lamtor4||Lamtor4|NM_001081108|	79.79	72.77	87.22	63.15	88.48	-0.0976895	0.693396	1	Mm.206901	NM_001081108	ENSMUSG00000050552	0910001L09Rik|AV006840	-	5|5 G2	late endosomal/lysosomal adaptor, MAPK and MTOR activator 4	protein-coding	no	no	78.282	yes
Snx4	NM_080557	chr16	33251456	33299562	+	2415	1	Snx4||Snx4|NM_080557|	199.48	209.96	223.11	184.33	192.8	-0.175906	0.166123	1	Mm.28196	NM_080557	ENSMUSG00000022808	1810036H14Rik|AI037066	-	16|16 B3	sorting nexin 4	protein-coding	no	no	201.936	yes
Bad	NM_007522	chr19	6941861	6951905	+	1451	1	Bad||Bad|NM_007522|	70.12	78.74	84.47	63.15	65.2	-0.293998	0.152272	1	Mm.4387	NM_007522	ENSMUSG00000024959	AI325008|Bbc2	-	19|19 A	BCL2-associated agonist of cell death	protein-coding	no	no	72.336	yes
Usp20	NM_028846	chr2	30982279	31022655	+	4108	1	Usp20||Usp20|NM_028846|	108.81	100.21	119.36	122.89	115.5	0.10722	0.506438	1	Mm.346654	NM_028846	ENSMUSG00000026854	1700055M05Rik|AI467231|Vdu2	-	2|2 B	ubiquitin specific peptidase 20	protein-coding	no	no	113.354	yes
Tmem143	NM_144801	chr7	45897069	45917413	+	2154	1	Tmem143||Tmem143|NM_144801|	114.85	116.91	132.21	105.82	132.26	-0.0474347	0.811387	1	Mm.163766	NM_144801	ENSMUSG00000002781	2310076O21Rik|AI481604	-	7|7 B3	transmembrane protein 143	protein-coding	no	no	120.41	yes
Rars	NM_025936	chr11	35808381	35834528	-	2102	1	Rars||Rars|NM_025936|	125.74	120.49	112.93	125.45	132.26	0.0989377	0.557868	1	Mm.284906	NM_025936	ENSMUSG00000018848	2610011N19Rik|2610037E21Rik|AL033339|AW985894	-	11|11 A4	arginyl-tRNA synthetase	protein-coding	no	no	123.374	yes
Lrba	NM_030695	chr3	86224690	86782694	+	9770	1	Lrba||Lrba|NM_030695|	696.38	644.2	599.54	552.13	588.65	-0.193883	0.0909214	1	Mm.439825	NM_030695	ENSMUSG00000028080	C80285|D3Ertd775e|Lab300|Lba	-	3|3 F1	LPS-responsive beige-like anchor	protein-coding	no	no	616.18	yes
Smchd1	NM_028887	chr17	71344491	71475343	-	6955	1	Smchd1||Smchd1|NM_028887|	350.61	316.14	280.95	340.5	308.3	0.0296894	0.858956	1	Mm.194450	NM_028887	ENSMUSG00000024054	4931400A14Rik|AW554188|MommeD1|mKIAA0650	-	17|17 E1.3	SMC hinge domain containing 1	protein-coding	no	no	319.3	yes
Vwa7	NM_138582	chr17	35016579	35026741	+	4280	1	Vwa7||Vwa7|NM_138582|	58.03	63.23	50.5	49.5	50.3	-0.199878	0.39219	1	Mm.56895	NM_138582	ENSMUSG00000007030	C6orf27|D17H6S56E-3|G7c|NG37	-	17 B1|17 18.55 cM	von Willebrand factor A domain containing 7	protein-coding	no	no	54.312	yes
Tomm34	NM_025996	chr2	164053540	164071102	-	2289	1	Tomm34||Tomm34|NM_025996|	380.83	415.15	445.3	362.68	393.06	-0.145812	0.191045	1	Mm.23173	NM_025996	ENSMUSG00000018322	2610100K07Rik|TOM34	-	2|2 H3	translocase of outer mitochondrial membrane 34	protein-coding	no	no	399.404	yes
Nup93	NM_001357266	chr8	94214564	94315066	+	2870	1	Nup93||Nup93|NM_001357266|	73.75	69.19	74.37	89.6	86.62	0.271037	0.14177	1	Mm.458170	NM_172410	ENSMUSG00000032939	2410008G02Rik	-	8|8 C5	nucleoporin 93	protein-coding	no	no	78.706	yes
Arap1	NM_001040112	chr7	101378122	101412586	+	5253	1	Arap1||Arap1|NM_001040112|	702.43	666.87	742.77	714.27	714.4	0.00777079	0.938783	1	Mm.277687	NM_027180	ENSMUSG00000032812	2410002L19Rik|Centd2|mKIAA0782	-	7|7 E2	ArfGAP with RhoGAP domain, ankyrin repeat and PH domain 1	protein-coding	no	no	708.148	yes
Aph1a	NM_146104	chr3	95893921	95898592	+	3204	1	Aph1a||Aph1a|NM_146104|	61.66	85.89	73.45	54.62	67.06	-0.289606	0.191898	1	Mm.306954	NM_146104	ENSMUSG00000015750	6530402N02Rik|APH-1a	-	3|3 F2.1	aph1 homolog A, gamma secretase subunit	protein-coding	no	no	68.536	yes
B3galt6	NM_080445	chr4	155989466	155992678	-	3212	1	B3galt6||B3galt6|NM_080445|	79.79	70.38	90.9	72.54	75.44	-0.139094	0.488244	1	Mm.440185	NM_080445	ENSMUSG00000050796	BB129894|GalTII	-	4|4 E2	UDP-Gal:betaGal beta 1,3-galactosyltransferase, polypeptide 6	protein-coding	no	no	77.81	yes
	NM_001373939	chr8	124671327	124721972	-	3259	1	Ttc13||Ttc13|NM_001373939|	236.96	263.65	263.5	253.45	241.24	-0.0540949	0.672578	1									no	no	251.76	yes
Srgap3	NM_080448	chr6	112717972	112947266	-	8843	1	Srgap3||Srgap3|NM_080448|	56.82	60.84	54.17	60.59	59.61	0.0641363	0.81694	1	Mm.236401	NM_080448	ENSMUSG00000030257	AI452337|Arhgap14|D130026O08Rik|Gbi|MEGAP|WRP|mKIAA0411	-	6|6 E3	SLIT-ROBO Rho GTPase activating protein 3	protein-coding	no	no	58.406	yes
Vdac3	NM_001198998	chr8	22577075	22593813	-	1406	1	Vdac3||Vdac3|NM_001198998|	42.31	52.49	47.74	40.96	44.71	-0.161424	0.545364	1	Mm.227704	NM_011696	ENSMUSG00000008892	-	-	8 A2|8 11.42 cM	voltage-dependent anion channel 3	protein-coding	no	no	45.642	yes
Wdr25	NM_177602	chr12	108894272	109028452	+	2644	1	Wdr25||Wdr25|NM_177602|	38.69	36.98	43.15	29.01	53.09	0.0266383	0.918632	1	Mm.342082	NM_177602	ENSMUSG00000040877	B930090D16Rik	-	12|12 F1	WD repeat domain 25	protein-coding	no	no	40.184	yes
L2hgdh	NM_145443	chr12	69690436	69724874	-	3319	1	L2hgdh||L2hgdh|NM_145443|	42.31	45.33	47.74	50.35	38.19	-0.0366063	0.928053	1	Mm.103362	NM_145443	ENSMUSG00000020988	BC016226	-	12|12 C2	L-2-hydroxyglutarate dehydrogenase	protein-coding	no	no	44.784	yes
Zfp383	NM_001243908	chr7	29908517	29916813	+	2611	1	Zfp383||Zfp383|NM_001243908|	49.57	84.7	57.84	64.86	56.82	-0.0779706	0.790088	1	Mm.333743	NM_001243908	ENSMUSG00000099689	1110003H10Rik	-	7|7 B1	zinc finger protein 383	protein-coding	no	no	62.758	yes
Pick1	NM_001045558	chr15	79229382	79249466	+	1952	1	Pick1||Pick1|NM_001045558|	56.82	44.14	72.53	62.3	65.2	0.113465	0.605334	1	Mm.259464	NM_008837	ENSMUSG00000068206	Prkcabp	-	15|15 E1	protein interacting with C kinase 1	protein-coding	no	no	60.198	yes
Glod4	NM_001362901	chr11	76220395	76243699	-	3067	1	Glod4||Glod4|NM_001362901|	163.21	162.24	175.36	140.81	145.3	-0.2369	0.0814792	1	Mm.482113	NM_026029	ENSMUSG00000017286	1700082G03Rik|2700085E05Rik|C81254	-	11|11 B5	glyoxalase domain containing 4	protein-coding	no	no	157.384	yes
Ppp2r5c	NM_001364204	chr12	110447224	110583074	+	4458	1	Ppp2r5c||Ppp2r5c|NM_001364204|	639.56	594.1	597.71	525.68	556.05	-0.187216	0.0776751	1	Mm.240396	NM_012023	ENSMUSG00000017843	2610043M05Rik|2700063L20Rik|AI060890|AW545884|C85228|D12Bwg0916e	-	12 F1|12 60.56 cM	protein phosphatase 2, regulatory subunit B', gamma	protein-coding	no	no	582.62	yes
Prpf6	NM_133701	chr2	181601319	181655661	+	3014	1	Prpf6||Prpf6|NM_133701|	197.07	168.21	213.93	179.21	188.15	-0.0891465	0.549078	1	Mm.292001	NM_133701	ENSMUSG00000002455	1190003A07Rik|2610031L17Rik|ANT-1|U5-102K	-	2|2 H4	pre-mRNA splicing factor 6	protein-coding	no	no	189.314	yes
Ovca2	NM_027136	chr11	75175943	75178808	-	2639	1	Ovca2||Ovca2|NM_027136|	217.62	196.84	254.32	215.05	223.54	-0.0418432	0.778481	1	Mm.41496	NM_027136	ENSMUSG00000038268	9030414M07Rik	-	11|11 B5	candidate tumor suppressor in ovarian cancer 2	protein-coding	no	no	221.474	yes
Bcl7b	NM_009745	chr5	135168372	135181852	+	1655	1	Bcl7b||Bcl7b|NM_009745|	177.72	158.66	199.24	156.17	169.52	-0.151198	0.307294	1	Mm.405834	NM_009745	ENSMUSG00000029681	-	-	5|5 G2	B cell CLL/lymphoma 7B	protein-coding	no	no	172.262	yes
Taz	NM_001173547	chrX	74282718	74290151	+	1814	1	Taz||Taz|NM_001173547|	317.97	344.77	325.02	277.35	308.3	-0.181341	0.119353	1	Mm.268483	NM_181516	ENSMUSG00000009995	5031411C02Rik|9130012G04Rik|AW107266|AW552613|G4.5	-	X A7.3|X 37.95 cM	tafazzin	protein-coding	no	no	314.682	yes
[truncated: 23,839 more rows]

## Sheet: WT_Basal_WT_CPZ_CD11clo
Gene	ID	chr	start	end	strand	Length	Copies	Annotation/Divergence	WT_Basal_rep1/	WT_Basal_rep2/	WT_Basal_rep3/	WT_CPZ_CD11clo_rep1/	WT_Basal vs. WT_CPZ_CD11clo Log2 Fold Change	WT_Basal vs. WT_CPZ_CD11clo p-value	WT_Basal vs. WT_CPZ_CD11clo adj. p-value	Unigene	RefSeq	Ensembl	alias	orf	chromosome	description	type	Upregulated	Downregulated	BaseMean	HasReads
[truncated: 25,239 more rows]

[truncated: 4 more sheets: WT_Basal_WT_CPZ_CD11chi, WT_CPZ_CD11clo_WT_CPZ_CD11chi, WT_CPZ_CD11clo_KO_CPZ_CD11clo, WT_CPZ_CD11chi_KO_CPZ_CD11clo]
